# Supplementary material for: Correlation and agreement of regional cerebral oxygen saturation measured from sensor sites at frontal and temporal areas in adult patients undergoing cardiovascular anesthesia
Source: PeerJ. 2022 Sep 15;10:e14058. doi: 10.7717/peerj.14058 (PMC9482766; doi:10.7717/peerj.14058)
Supplement: Supplemental Information 1 [file peerj-10-14058-s001.xlsx]

## Sheet: Data_overall
ID	HN	Sex		Age	Dx	Valve		OP1	OP2	BW	HT	HT2	BMI	EF	FC				ASA				U/D														MAP	HR	SpO2	CVP	Nasal temp	ETCO2	Hb	Hct	PaO2	PaCO2	P/F ratio	BS	Anesth Time
		M	F												I	II	III	IV	I	II	III	IV	HT	DM	MI	DLP	CHF	AF	AV block	CKD	old CVA	Liver imp	Vascular Dz	Anemia	coag	Others
1	HC8783		1	59	CAD			OPCAB		65	1.56	2.4336	26.7094								1		1	1	1												75	97	100	8	35.2	32	10	30	223	41	446	154	435
2	KL1295		1	54	Adult congenital heart disease			VSD closure	PFO closure	65	1.53	2.3409	27.7671							1																	89	60	95	21	36.5	30	11.8	36	168	34	336	101	300
3	FL7521		1	55	Rt. Upper Lung Mass			VATs Rt. UL lobectomy		66	1.54	2.3716	27.8293							1			1													SVT	95	48	100		35.8	43	11.9	36	218	51	436	102	360
4	KB0557		1	21	Rt. Bronchial Carcinoid Tumor			Rt. Middle Lobe Lobectomy	Bronchoscopy	52	1.65	2.7225	19.1001							1																bipolar disorders	85	61	99	8	35.7	27	13.6	41	149	36	372.5	86	300
5	AK4203		1	60	Rt. Middle Lung Nudule			VATs Rt. Middle Lung Lobectomy		65	1.6	2.56	25.3906							1						1										Allergic rhinitis	95	46	100		35.9	32	13.5	41	242	40	484	109	220
6	CB6404	1		67	Aortic dissection type B	Endoleak type IIIB	S/P graft replacement	EVAR		55	1.69	2.8561	19.257								1		1							1						HBV	115	60	100		35.2	30	10.1	30	259	36	518	93	220
7	AQ2677		1	76	Thoracic aortic aneurysm			TEVAR		53	1.59	2.5281	20.9644								1															Asthma, sensory hearing loss	65	74	100		36.3	34	10.1	30	88	34	176	96	165
8	KL3818	1		63	severe AR	Ascend Ao dilatation		Bentall		82	1.73	2.9929	27.3982								1		1														60	77	100	6	36.6	33	15.2	46	127	41	254	106	306
9	JZ7326	1		38	Ebstein's Anomaly	PFO	SPVAE TR	Cone operation		80	1.8	3.24	24.6914																								108	67	100	5	35.6	32	15.4	48	80	32	380	107	281
10	GB0773		1	55	Lt. Lower Lung Nodule			VATs Lt. Lower lung Lobectomy	LN dissection	67	1.58	2.4964	26.8386							1						1											118	91	100		36	32	12.2	37	150	43	300	119	280
11	KL5650	1		51	Severe MR, TR			MV repair	TVA	56	1.65	2.7225	20.5693								1																87	80	88	25	35.6	26	13.8	41	159	34	265	117	315
12	HT3001		1	21	MG			VATs Thymectomy		47	1.61	2.5921	18.132							1																	95	74	100		35.4	28	11.3	36	79	32	131	110	195
13	KL4067	1		77	TVD	Severe AS	Mild AR	CABG	AVR	57	1.64	2.6896	21.1927												1					1							115	70	100	5	35	30	10	30	95	38	452	105	512
14	KL5188	1		59	DVD			CABG on Pump Beating Heart		64	1.64	2.6896	23.7954								1		1	1	1					1							74	80	98	9	35.5	31	9.1	27	91	38	182	245	565
15	IL6958		1	53	Pericardial effeusion	CA Lung Advance stage		Pericardiaopleural Shunt		46	1.55	2.4025	19.1467								1																98	92	100		36.5	38	11.4	34	178	42	356	150	100
16	KL7917		1	47	Severe MR & TR			MVR & TVA		49	1.5	2.25	21.7778																							Pulmonary hypertension, Hypothyroid	99	73	100	6	35.5	39	11.3	35	244	35	488	214	315
17	KL7913	1		71	Severe MR			MV repair		58	1.7	2.89	20.0692										1														65	70	100	8	35.8	356	10.9	34.3	235	39	470	146	315
18	KL9030	1		70	Severe AR, Mod MR	Mild TR		AVR, MVR		70	1.68	2.8224	24.8016								1		1														76	86	100	8	36.8	35	16	49	331	35	550	140	380
19	GO1969	1		78	MG			VaATs Total Thymectomy		78	1.73	2.9929	26.0617							1																	68	70	100		35.5	38	14.7	45	203	36	400	119	250
20	KL9262	1		48	Valve					65	1.7	2.89	22.4913							1																	68	80	100	17	35.5	35	13.2	39	99	38	470	108	350
21	FE9503	1		68	SVD	Severe AS	Aortic root aneurysm	CABGX1, AVR	Aortic root graft replacement	70	1.65	2.7225	25.7117																				1				88	70	100		36	36	12.8	38	128	42	320	110	435
		11	10																	8	8	0	7	2	3	2	0	0	0	3	0	0	1	0	0
Mean				56.7143						62.381	1.63429	2.67649	23.3188																								87.5238	72.6667	99.0476	10.5	35.8048	48.4286	12.3	37.3	168.857	37.9524	370.786	125.571	314.238
SD				15.8781						10.3512	0.0766532	0.251582	3.2585																								17.7246	13.23	2.78345	6.68105	0.496464	70.5971	1.99499	6.2466	70.5537	4.46628	118.829	39.4672	110.879
Median				59						65	1.64	2.6896	23.7954																								88	73	100	8	35.7	32	11.9	36	159	38	380	110	306
Mode				59						65	1.65	2.7225	#N/A																								95	70	100	8	35.5	32	10	30	#N/A	34	470	119	315
[truncated: 192 more columns]

## Sheet: ID 1
Date	Time	Technology	CO	sCO	CI	sCI	SV	SVI	PR	SYSART	DIAART	MAP	SVR	SVRI	SVV	PRV	PPV	EDV	sEDV	EDVI	sEDVI	RVEF	sRVEF	ScvO₂/SvO₂	SQI	StO₂ A1	TPI A1	StO₂ A2	TPI A2	StO₂ B1	TPI B1	StO₂ B2	TPI B2
		1-F, 4-SG	L/min	L/min	L/min/m²	L/min/m²	mL/b	mL/b/m²	bpm	mmHg	mmHg	mmHg	dyne-s/cm⁵	dyne-s-m²/cm⁵	%		%	mL	mL	mL/m²	mL/m²	% EFU	% EFU	%		%		%		%		%
10/03/2021	9:39:31 pm	4																									65535		65535
10/03/2021	9:39:51 pm	4																									65535		65535
10/03/2021	9:40:11 pm	4																									65535		65535
10/03/2021	9:40:31 pm	4																									65535		65535
10/03/2021	9:40:51 pm	4																									65535		65535
10/03/2021	9:41:11 pm	4																									65535		65535
10/03/2021	9:41:31 pm	4																									65535		65535
10/03/2021	9:41:51 pm	4
10/03/2021	9:42:11 pm	4
10/03/2021	9:42:31 pm	4
10/03/2021	9:42:51 pm	4
10/03/2021	9:43:11 pm	4
10/03/2021	9:43:31 pm	4
10/03/2021	9:43:51 pm	4
10/03/2021	9:44:11 pm	4
10/03/2021	9:44:31 pm	4
10/03/2021	9:44:51 pm	4
10/03/2021	9:45:11 pm	4
10/03/2021	9:45:31 pm	4
10/03/2021	9:45:51 pm	4
10/03/2021	9:46:11 pm	4
10/03/2021	9:46:31 pm	4
10/03/2021	9:46:51 pm	4
10/03/2021	9:47:11 pm	4
10/03/2021	9:47:31 pm	4
10/03/2021	9:47:51 pm	4
10/03/2021	9:48:11 pm	4
10/03/2021	9:48:31 pm	4
10/03/2021	9:48:51 pm	4
10/03/2021	9:49:11 pm	4
10/03/2021	9:49:31 pm	4
10/03/2021	9:49:51 pm	4
10/03/2021	9:50:11 pm	4
10/03/2021	9:50:31 pm	4
10/03/2021	9:50:51 pm	4
10/03/2021	9:51:11 pm	4
10/03/2021	9:51:31 pm	4
10/03/2021	9:51:51 pm	4																								73	4	70	4	74	4	64	4
10/03/2021	9:52:11 pm	4																								73	4	71	4	74	4	62	4
10/03/2021	9:52:31 pm	4																								73	4	71	4	74	4	62	4
10/03/2021	9:52:51 pm	4																								74	4	70	4	74	4	62	4
10/03/2021	9:53:11 pm	4																								73	4	70	4	74	4	64	4
10/03/2021	9:53:31 pm	4																								73	4	70	4	74	4	64	4
10/03/2021	9:53:51 pm	4																								72	4	70	4	73	4	64	4
10/03/2021	9:54:11 pm	4																								72	4	71	4	74	4	70	4
10/03/2021	9:54:31 pm	4																								72	4	71	4	74	4	70	4
10/03/2021	9:54:51 pm	4																								72	4	70	4	74	4	68	4
10/03/2021	9:55:11 pm	4																								71	4	70	4	74	4	66	4
10/03/2021	9:55:31 pm	4																								71	4	70	4	74	4	68	4
10/03/2021	9:55:51 pm	4																								71	4	69	4	74	4	68	4
10/03/2021	9:56:11 pm	4																								71	4	68	4	74	4	68	4
10/03/2021	9:56:31 pm	4																								72	4	67	4	73	4	68	4
10/03/2021	9:56:51 pm	4																								73	4	68	4	74	4	68	4
10/03/2021	9:57:11 pm	4																								73	4	69	4	74	4	68	4
10/03/2021	9:57:31 pm	4																								74	4	69	4	75	4	68	4
10/03/2021	9:57:51 pm	4																								75	4	71	4	76	4	68	4
10/03/2021	9:58:11 pm	4																								76	4	73	4	76	4	68	4
10/03/2021	9:58:31 pm	4																								74	4	76	3	76	4	68	4
10/03/2021	9:58:51 pm	4																								74	4	77	4	76	4	68	4
10/03/2021	9:59:11 pm	4																								74	4	79	3	78	4	72	4
10/03/2021	9:59:31 pm	4																								72	4	77	4	79	4	72	4
10/03/2021	9:59:51 pm	4																								72	4	81	3	82	4	72	4
10/03/2021	10:00:11 pm	4																								72	4	81	3	83	4	72	4
10/03/2021	10:00:31 pm	4																								73	4	81	4	83	4	72	4
10/03/2021	10:00:51 pm	4																								74	4	80	4	84	4	72	4
10/03/2021	10:01:11 pm	4																								75	4	82	3	84	4	72	4
10/03/2021	10:01:31 pm	4																								75	4	81	3	85	4	72	4
10/03/2021	10:01:51 pm	4																								75	4	83	3	85	4	72	4
10/03/2021	10:02:11 pm	4																								75	4	82	3	86	4	72	4
10/03/2021	10:02:31 pm	4																								75	4	82	4	87	4	72	4
10/03/2021	10:02:51 pm	4																								75	4	82	3	88	4	72	4
10/03/2021	10:03:11 pm	4																								75	4	83	3	87	4	72	4
10/03/2021	10:03:31 pm	4																								74	4	83	3	88	4	72	4
10/03/2021	10:03:51 pm	4																								75	4	82	3	88	4	72	4
10/03/2021	10:04:11 pm	4																								75	4	81	3	88	4	72	4
10/03/2021	10:04:31 pm	4																								76	4	83	3	86	4	72	4
10/03/2021	10:04:51 pm	4																								79	4	82	3	90	4	72	4
10/03/2021	10:05:11 pm	4																								81	4	83	3	91	3	72	4
10/03/2021	10:05:31 pm	4																								81	4	82	3	92	2	72	4
10/03/2021	10:05:51 pm	4																								79	4	77	4	91	3	70	4
10/03/2021	10:06:11 pm	4																								78	4	78	3	90	3	66	4
10/03/2021	10:06:31 pm	4																								78	4	75	4	90	3	63	4
10/03/2021	10:06:51 pm	4																								78	4	76	3	90	3	63	4
10/03/2021	10:07:11 pm	4																								78	4	75	4	90	4	63	4
10/03/2021	10:07:31 pm	4																								77	4	73	4	89	4	63	4
10/03/2021	10:07:51 pm	4																								77	4	74	4	89	4	63	4
10/03/2021	10:08:11 pm	4																								77	4	71	4	89	4	63	3
10/03/2021	10:08:31 pm	4																								78	4	71	4	89	4	63	2
10/03/2021	10:08:51 pm	4																								79	4	70	4	89	4	64	3
10/03/2021	10:09:11 pm	4																								79	4	69	4	92	2	64	4
10/03/2021	10:09:31 pm	4																								79	4	68	4	91	3	64	3
10/03/2021	10:09:51 pm	4																								79	4	65	4	91	3	63	3
10/03/2021	10:10:11 pm	4																								78	4	65	4	91	3	63	3
10/03/2021	10:10:31 pm	4																								78	4	65	4	90	3	64	3
10/03/2021	10:10:51 pm	4																								79	4	66	4	90	3	61	3
10/03/2021	10:11:11 pm	4																								79	4	65	4	90	3	62	3
10/03/2021	10:11:31 pm	4																								79	4	64	4	90	3	62	3
10/03/2021	10:11:51 pm	4																								80	4	65	4	90	3	63	3
10/03/2021	10:12:11 pm	4																								80	4	65	4	90	3	63	3
10/03/2021	10:12:31 pm	4																								80	4	66	4	89	4	63	3
10/03/2021	10:12:51 pm	4																								80	4	66	4	89	4	61	4
10/03/2021	10:13:11 pm	4																								80	4	65	4	89	4	63	3
10/03/2021	10:13:31 pm	4																								80	4	66	4	89	4	64	3
10/03/2021	10:13:51 pm	4																								80	4	67	4	89	4	64	2
10/03/2021	10:14:11 pm	4																								80	4	68	4	89	4	65	3
10/03/2021	10:14:31 pm	4																								80	4	69	4	90	3	66	3
10/03/2021	10:14:51 pm	4																								81	4	70	4	90	4	65	3
10/03/2021	10:15:11 pm	4																								81	4	70	4	90	3	64	3
10/03/2021	10:15:31 pm	4																								80	4	70	4	90	4	65	3
10/03/2021	10:15:51 pm	4																								80	4	69	4	90	4	67	3
10/03/2021	10:16:11 pm	4																								80	4	70	4	89	4	67	3
10/03/2021	10:16:31 pm	4																								79	4	70	4	89	4	67	3
10/03/2021	10:16:51 pm	4																								79	4	71	4	89	4	67	3
10/03/2021	10:17:11 pm	4																								79	4	71	4	89	3	66	3
10/03/2021	10:17:31 pm	4																								79	4	71	4	89	4	64	4
10/03/2021	10:17:51 pm	4																								79	4	71	4	89	4	63	4
10/03/2021	10:18:11 pm	4																								79	4	71	4	89	3	65	3
10/03/2021	10:18:31 pm	4																								79	4	71	4	89	4	65	3
10/03/2021	10:18:51 pm	4																								78	4	71	4	88	4	64	3
10/03/2021	10:19:11 pm	4																								79	4	72	4	88	4	64	3
10/03/2021	10:19:31 pm	4																								79	4	70	4	89	3	68	4
10/03/2021	10:19:51 pm	4																								79	4	70	4	89	3	68	4
10/03/2021	10:20:11 pm	4																								78	4	70	4	88	4	68	4
10/03/2021	10:20:31 pm	4																								79	4	70	4	88	4	64	4
10/03/2021	10:20:51 pm	4																								79	4	71	4	88	4	62	4
10/03/2021	10:21:11 pm	4																								79	4	71	4	88	4	62	4
10/03/2021	10:21:31 pm	4																								79	4	70	4	87	4	62	4
10/03/2021	10:21:51 pm	4																								79	4	70	4	87	4	64	4
10/03/2021	10:22:11 pm	4																								79	4	70	4	87	4	64	4
10/03/2021	10:22:31 pm	4																								78	4	70	4	87	4	64	4
10/03/2021	10:22:51 pm	4																								79	4	71	4	87	4	70	4
10/03/2021	10:23:11 pm	4																								78	4	71	4	87	4	70	4
10/03/2021	10:23:31 pm	4																								78	4	70	4	86	4	68	4
10/03/2021	10:23:51 pm	4																								78	4	70	4	86	4	66	4
10/03/2021	10:24:11 pm	4																								78	4	70	4	86	4	68	4
10/03/2021	10:24:31 pm	4																								78	4	69	4	86	4	68	4
10/03/2021	10:24:51 pm	4																								78	4	68	4	86	4	68	4
10/03/2021	10:25:11 pm	4																								78	4	67	4	86	4	68	4
10/03/2021	10:25:31 pm	4																								77	4	68	4	88	3	68	4
10/03/2021	10:25:51 pm	4																								77	4	69	4	87	4	68	4
10/03/2021	10:26:11 pm	4																								77	4	69	4	86	4	68	4
10/03/2021	10:26:31 pm	4																								77	4	71	4	88	4	68	4
10/03/2021	10:26:51 pm	4																								77	4	73	4	85	4	68	4
10/03/2021	10:27:11 pm	4																								77	4	76	3	85	4	68	4
10/03/2021	10:27:31 pm	4																								76	4	77	4	84	4	68	4
10/03/2021	10:27:51 pm	4																								76	4	79	3	84	4	72	4
10/03/2021	10:28:11 pm	4																								77	4	77	4	83	4	72	4
10/03/2021	10:28:31 pm	4																								76	4	81	3	84	4	72	4
10/03/2021	10:28:51 pm	4																								76	4	81	3	84	4	72	4
10/03/2021	10:29:11 pm	4																								76	4	81	4	83	4	72	4
10/03/2021	10:29:31 pm	4																								77	4	80	4	84	4	72	4
10/03/2021	10:29:51 pm	4																								77	4	82	3	83	4	72	4
10/03/2021	10:30:11 pm	4																								77	4	81	3	83	4	72	4
10/03/2021	10:30:31 pm	4																								77	4	83	3	81	4	72	4
10/03/2021	10:30:51 pm	4																								77	4	82	3	82	4	72	4
10/03/2021	10:31:11 pm	4																								76	4	82	4	84	4	72	4
10/03/2021	10:31:31 pm	4																								76	4	82	3	83	4	72	4
10/03/2021	10:31:51 pm	4																								76	4	83	3	83	4	72	4
10/03/2021	10:32:11 pm	4																								76	4	83	3	83	4	72	4
10/03/2021	10:32:31 pm	4																								76	4	82	3	82	4	72	4
10/03/2021	10:32:51 pm	4																								76	4	81	3	82	4	72	4
10/03/2021	10:33:11 pm	4																								76	4	83	3	82	4	72	4
10/03/2021	10:33:31 pm	4																								75	4	82	3	82	4	72	4
10/03/2021	10:33:51 pm	4																								75	4	83	3	82	4	72	4
10/03/2021	10:34:11 pm	4																								75	4	82	3	81	4	72	4
10/03/2021	10:34:31 pm	4																								75	4	77	4	81	4	70	4
10/03/2021	10:34:51 pm	4																								75	4	78	3	81	4	66	4
10/03/2021	10:35:11 pm	4																								74	4	75	4	81	4	63	4
10/03/2021	10:35:31 pm	4																								74	4	76	3	81	4	63	4
10/03/2021	10:35:51 pm	4																								74	4	75	4	85	3	63	4
10/03/2021	10:36:11 pm	4																								74	4	73	4	82	4	63	4
10/03/2021	10:36:31 pm	4																								74	4	74	4	82	4	63	4
10/03/2021	10:36:51 pm	4																								75	4	71	4	84	3	63	3
10/03/2021	10:37:11 pm	4																								74	4	71	4	83	4	63	2
10/03/2021	10:37:31 pm	4																								74	4	70	4	82	4	64	3
10/03/2021	10:37:51 pm	4																								74	4	69	4	84	4	64	4
10/03/2021	10:38:11 pm	4																								75	4	68	4	84	4	64	3
10/03/2021	10:38:31 pm	4																								75	4	65	4	87	3	63	3
10/03/2021	10:38:51 pm	4																								77	4	65	4	88	2	63	3
10/03/2021	10:39:11 pm	4																								79	4	65	4	92	2	64	3
10/03/2021	10:39:31 pm	4																								77	4	66	4	92	3	61	3
10/03/2021	10:39:51 pm	4																								77	4	65	4	91	3	62	3
10/03/2021	10:40:11 pm	4																								77	4	64	4	91	3	62	3
10/03/2021	10:40:31 pm	4																								77	4	65	4	90	3	63	3
10/03/2021	10:40:51 pm	4																								76	4	65	4	90	3	63	3
10/03/2021	10:41:11 pm	4																								77	4	66	4	90	3	63	3
10/03/2021	10:41:31 pm	4																								76	4	66	4	91	2	61	4
10/03/2021	10:41:51 pm	4																								77	4	65	4	90	3	63	3
10/03/2021	10:42:11 pm	4																								78	4	66	4	90	3	64	3
10/03/2021	10:42:31 pm	4																								79	4	67	4	91	3	64	2
10/03/2021	10:42:51 pm	4																								79	4	68	4	91	3	65	3
10/03/2021	10:43:11 pm	4																								80	4	69	4	92	2	66	3
10/03/2021	10:43:31 pm	4																								81	4	70	4	92	3	65	3
10/03/2021	10:43:51 pm	4																								80	4	70	4	92	2	64	3
10/03/2021	10:44:11 pm	4																								81	4	70	4	92	2	65	3
10/03/2021	10:44:31 pm	4																								80	4	69	4	91	4	67	3
10/03/2021	10:44:51 pm	4																								82	4	70	4	92	3	67	3
10/03/2021	10:45:11 pm	4																								81	4	70	4	90	4	67	3
10/03/2021	10:45:31 pm	4																								82	4	71	4	89	4	67	3
10/03/2021	10:45:51 pm	4																								81	4	71	4	92	3	66	3
10/03/2021	10:46:11 pm	4																								81	4	71	4	93	1	64	4
10/03/2021	10:46:31 pm	4																								82	4	71	4	93	2	63	4
10/03/2021	10:46:51 pm	4																								83	4	71	4	91	3	65	3
10/03/2021	10:47:11 pm	4																								82	4	71	4	92	2	65	3
10/03/2021	10:47:31 pm	4																								82	4	71	4	91	3	64	3
10/03/2021	10:47:51 pm	4																								87	4	72	4	96	1	64	3
10/03/2021	10:48:11 pm	4																								82	4	70	4	86	1	68	4
10/03/2021	10:48:31 pm	4																								83	4	70	4	86	1	68	4
10/03/2021	10:48:51 pm	4																								78	4	70	4	81	1	68	4
10/03/2021	10:49:11 pm	4																								80	4	70	4	79	3	64	4
10/03/2021	10:49:31 pm	4																								78	4	71	4	89	2	62	4
10/03/2021	10:49:51 pm	4																								77	2	71	4	78	4	62	4
10/03/2021	10:50:11 pm	4																								73	4	70	4	78	4	62	4
10/03/2021	10:50:31 pm	4																								81	4	70	4	91	1	64	4
10/03/2021	10:50:51 pm	4																								80	4	70	4	68	4	64	4
10/03/2021	10:51:11 pm	4																								86	4	70	4	69	3	64	4
10/03/2021	10:51:31 pm	4																								81	4	71	4	81	2	70	4
10/03/2021	10:51:51 pm	4																								81	4	71	4	82	2	70	4
10/03/2021	10:52:11 pm	4																								83	4	70	4	88	1	68	4
10/03/2021	10:52:31 pm	4																								81	4	70	4	73	4	66	4
10/03/2021	10:52:51 pm	4																								82	4	70	4	88	3	68	4
10/03/2021	10:53:11 pm	4																								83	4	69	4	87	2	68	4
10/03/2021	10:53:31 pm	4																								79	4	68	4	87	1	68	4
10/03/2021	10:53:51 pm	4																								84	4	67	4	82	1	68	4
10/03/2021	10:54:11 pm	4																								80	4	68	4	76	3	68	4
10/03/2021	10:54:31 pm	4																								75	3	69	4	96	4	68	4
10/03/2021	10:54:51 pm	4																								81	4	69	4	96	3	68	4
10/03/2021	10:55:11 pm	4																								84	4	71	4	91	1	68	4
10/03/2021	10:55:31 pm	4																								79	4	73	4	73	1	68	4
10/03/2021	10:55:51 pm	4																								78	4	76	3	86	3	68	4
10/03/2021	10:56:11 pm	4																								78	4	77	4	88	4	68	4
10/03/2021	10:56:31 pm	4																								88	4	79	3	73	1	72	4
10/03/2021	10:56:51 pm	4																								79	4	77	4	89	1	72	4
10/03/2021	10:57:11 pm	4																								81	4	81	3	94	3	72	4
10/03/2021	10:57:31 pm	4																								78	4	81	3	94	3	72	4
10/03/2021	10:57:51 pm	4																								80	4	81	4	86	1	72	4
10/03/2021	10:58:11 pm	4																								82	4	80	4	91	1	72	4
10/03/2021	10:58:31 pm	4																								82	4	82	3	91	1	72	4
10/03/2021	10:58:51 pm	4																								81	4	81	3	81	4	72	4
10/03/2021	10:59:11 pm	4																								81	4	83	3	90	3	72	4
10/03/2021	10:59:31 pm	4																								81	4	82	3	88	1	72	4
10/03/2021	10:59:51 pm	4																								78	4	82	4	88	3	72	4
10/03/2021	11:00:11 pm	4																								78	4	82	3	87	2	72	4
10/03/2021	11:00:31 pm	4																								79	4	83	3	88	3	72	4
10/03/2021	11:00:51 pm	4																								80	4	83	3	86	3	72	4
10/03/2021	11:01:11 pm	4																								78	4	82	3	83	1	72	4
10/03/2021	11:01:31 pm	4																								76	4	81	3	77	1	72	4
10/03/2021	11:01:51 pm	4																								76	4	83	3	77	1	72	4
10/03/2021	11:02:11 pm	4																								79	4	82	3	77	1	72	4
10/03/2021	11:02:31 pm	4																								79	4	83	3	77	1	72	4
10/03/2021	11:02:51 pm	4																								79	4	82	3	89	1	72	4
10/03/2021	11:03:11 pm	4																								79	4	77	4	89	1	70	4
10/03/2021	11:03:31 pm	4																								80	4	78	3	87	3	66	4
10/03/2021	11:03:51 pm	4																								79	4	75	4	89	4	63	4
10/03/2021	11:04:11 pm	4																								80	4	76	3	89	4	63	4
10/03/2021	11:04:31 pm	4																								80	4	75	4	89	4	63	4
10/03/2021	11:04:51 pm	4																								80	4	73	4	89	3	63	4
10/03/2021	11:05:11 pm	4																								80	4	74	4	89	3	63	4
10/03/2021	11:05:31 pm	4																								80	4	71	4	88	3	63	3
10/03/2021	11:05:51 pm	4																								80	4	71	4	89	3	63	2
10/03/2021	11:06:11 pm	4																								79	4	70	4	90	3	64	3
10/03/2021	11:06:31 pm	4																								79	4	69	4	89	3	64	4
10/03/2021	11:06:51 pm	4																								80	4	68	4	89	3	64	3
10/03/2021	11:07:11 pm	4																								79	4	65	4	89	3	63	3
10/03/2021	11:07:31 pm	4																								80	4	65	4	89	3	63	3
10/03/2021	11:07:51 pm	4																								78	4	65	4	89	4	64	3
10/03/2021	11:08:11 pm	4																								79	4	66	4	89	3	61	3
10/03/2021	11:08:31 pm	4																								79	4	65	4	89	3	62	3
10/03/2021	11:08:51 pm	4																								79	4	64	4	89	4	62	3
10/03/2021	11:09:11 pm	4																								80	4	65	4	89	3	63	3
10/03/2021	11:09:31 pm	4																								79	4	65	4	90	3	63	3
10/03/2021	11:09:51 pm	4																								80	4	66	4	90	3	63	3
10/03/2021	11:10:11 pm	4																								79	4	66	4	90	3	61	4
10/03/2021	11:10:31 pm	4																								80	4	65	4	90	3	63	3
10/03/2021	11:10:51 pm	4																								78	4	66	4	90	3	64	3
10/03/2021	11:11:11 pm	4																								80	4	67	4	90	3	64	2
10/03/2021	11:11:31 pm	4																								80	4	68	4	90	3	65	3
10/03/2021	11:11:51 pm	4																								79	4	69	4	90	3	66	3
10/03/2021	11:12:11 pm	4																								79	4	70	4	90	3	65	3
10/03/2021	11:12:31 pm	4																								80	4	70	4	90	3	64	3
10/03/2021	11:12:51 pm	4																								79	4	70	4	90	3	65	3
10/03/2021	11:13:11 pm	4																								80	4	69	4	90	3	67	3
10/03/2021	11:13:31 pm	4																								80	4	70	4	89	3	67	3
10/03/2021	11:13:51 pm	4																								80	4	70	4	90	3	67	3
10/03/2021	11:14:11 pm	4																								80	4	71	4	90	3	67	3
10/03/2021	11:14:31 pm	4																								80	4	71	4	90	3	66	3
10/03/2021	11:14:51 pm	4																								80	4	71	4	90	3	64	4
10/03/2021	11:15:11 pm	4																								80	4	71	4	90	3	63	4
10/03/2021	11:15:31 pm	4																								80	4	71	4	90	3	65	3
10/03/2021	11:15:51 pm	4																								80	4	71	4	90	3	65	3
10/03/2021	11:16:11 pm	4																								80	4	71	4	90	3	64	3
10/03/2021	11:16:31 pm	4																								80	4	72	4	90	3	64	3
10/03/2021	11:16:51 pm	4																								80	4	66	4	90	3	63	3
10/03/2021	11:17:11 pm	4																								80	4	66	4	90	3	61	4
10/03/2021	11:17:31 pm	4																								80	4	65	4	90	3	63	3
10/03/2021	11:17:51 pm	4																								81	4	66	4	90	3	64	3
10/03/2021	11:18:11 pm	4																								81	4	67	4	90	3	64	2
10/03/2021	11:18:31 pm	4																								81	4	68	4	90	3	65	3
10/03/2021	11:18:51 pm	4																								81	4	69	4	90	3	66	3
10/03/2021	11:19:11 pm	4																								81	4	70	4	91	3	65	3
10/03/2021	11:19:31 pm	4																								80	4	70	4	90	3	64	3
10/03/2021	11:19:51 pm	4																								80	4	70	4	90	3	65	3
10/03/2021	11:20:11 pm	4																								81	4	69	4	91	3	67	3
10/03/2021	11:20:31 pm	4																								81	4	70	4	91	3	67	3
10/03/2021	11:20:51 pm	4																								81	4	70	4	90	3	67	3
10/03/2021	11:21:11 pm	4																								81	4	71	4	90	3	67	3
10/03/2021	11:21:31 pm	4																								82	4	71	4	90	3	66	3
10/03/2021	11:21:51 pm	4																								81	4	71	4	91	3	64	4
10/03/2021	11:22:11 pm	4																								81	4	71	4	91	3	63	4
10/03/2021	11:22:31 pm	4																								81	4	71	4	91	3	65	3
10/03/2021	11:22:51 pm	4																								82	4	71	4	91	3	65	3
10/03/2021	11:23:11 pm	4																								82	4	71	4	91	3	64	3
10/03/2021	11:23:31 pm	4																								82	4	72	4	91	3	64	3
10/03/2021	11:23:51 pm	4																								81	4	70	4	91	3	68	4
10/03/2021	11:24:11 pm	4																								82	4	70	4	91	3	68	4
10/03/2021	11:24:31 pm	4																								83	4	70	4	91	3	68	4
10/03/2021	11:24:51 pm	4																								83	4	70	4	91	3	64	4
10/03/2021	11:25:11 pm	4																								82	4	71	4	91	3	62	4
10/03/2021	11:25:31 pm	4																								82	4	71	4	91	3	62	4
10/03/2021	11:25:51 pm	4																								83	4	70	4	92	3	62	4
10/03/2021	11:26:11 pm	4																								83	4	70	4	92	3	64	4
10/03/2021	11:26:31 pm	4																								83	4	70	4	92	3	64	4
10/03/2021	11:26:51 pm	4																								83	4	70	4	93	2	64	4
10/03/2021	11:27:11 pm	4																								83	4	71	4	93	2	70	4
10/03/2021	11:27:31 pm	4																								83	4	71	4	93	3	70	4
10/03/2021	11:27:51 pm	4																								83	4	70	4	93	3	68	4
10/03/2021	11:28:11 pm	4																								84	4	70	4	93	3	66	4
10/03/2021	11:28:31 pm	4																								84	4	70	4	93	3	68	4
10/03/2021	11:28:51 pm	4																								84	4	69	4	94	2	68	4
10/03/2021	11:29:11 pm	4																								84	4	68	4	94	2	68	4
10/03/2021	11:29:31 pm	4																								84	4	67	4	93	3	68	4
10/03/2021	11:29:51 pm	4																								84	4	68	4	94	2	68	4
10/03/2021	11:30:11 pm	4																								85	4	69	4	94	2	68	4
10/03/2021	11:30:31 pm	4																								85	4	69	4	94	2	68	4
10/03/2021	11:30:51 pm	4																								84	4	71	4	94	2	68	4
10/03/2021	11:31:11 pm	4																								85	4	73	4	94	2	68	4
10/03/2021	11:31:31 pm	4																								86	4	76	3	93	3	68	4
10/03/2021	11:31:51 pm	4																								84	4	77	4	94	2	68	4
10/03/2021	11:32:11 pm	4																								85	4	79	3	94	2	72	4
10/03/2021	11:32:31 pm	4																								85	4	77	4	93	2	72	4
10/03/2021	11:32:51 pm	4																								85	4	81	3	93	2	72	4
10/03/2021	11:33:11 pm	4																								84	4	81	3	94	2	72	4
10/03/2021	11:33:31 pm	4																								85	4	81	4	94	2	72	4
10/03/2021	11:33:51 pm	4																								84	4	80	4	94	3	72	4
10/03/2021	11:34:11 pm	4																								85	4	82	3	93	3	72	4
10/03/2021	11:34:31 pm	4																								85	4	81	3	94	2	72	4
10/03/2021	11:34:51 pm	4																								84	4	83	3	93	3	72	4
10/03/2021	11:35:11 pm	4																								85	4	82	3	93	3	72	4
10/03/2021	11:35:31 pm	4																								84	4	82	4	93	2	72	4
10/03/2021	11:35:51 pm	4																								84	4	82	3	94	2	72	4
10/03/2021	11:36:11 pm	4																								84	4	83	3	93	3	72	4
10/03/2021	11:36:31 pm	4																								84	4	83	3	93	3	72	4
10/03/2021	11:36:51 pm	4																								84	4	82	3	93	2	72	4
10/03/2021	11:37:11 pm	4																								84	4	81	3	93	3	72	4
10/03/2021	11:37:31 pm	4																								85	4	83	3	93	3	72	4
10/03/2021	11:37:51 pm	4																								85	4	82	3	93	3	72	4
10/03/2021	11:38:11 pm	4																								83	4	83	3	93	2	72	4
10/03/2021	11:38:31 pm	4																								85	4	82	3	93	2	72	4
10/03/2021	11:38:51 pm	4																								84	4	77	4	93	3	70	4
10/03/2021	11:39:11 pm	4																								84	4	78	3	93	3	66	4
10/03/2021	11:39:31 pm	4																								84	4	75	4	93	3	63	4
10/03/2021	11:39:51 pm	4																								84	4	76	3	93	3	63	4
10/03/2021	11:40:11 pm	4																								84	4	75	4	93	3	63	4
10/03/2021	11:40:31 pm	4																								84	4	73	4	93	2	63	4
10/03/2021	11:40:51 pm	4																								83	4	74	4	93	2	63	4
10/03/2021	11:41:11 pm	4																								83	4	71	4	93	2	63	3
10/03/2021	11:41:31 pm	4																								83	4	71	4	93	2	63	2
10/03/2021	11:41:51 pm	4																								84	4	70	4	93	2	64	3
10/03/2021	11:42:11 pm	4																								84	4	69	4	93	3	64	4
10/03/2021	11:42:31 pm	4																								84	4	68	4	93	3	64	3
10/03/2021	11:42:51 pm	4																								84	4	65	4	93	3	63	3
10/03/2021	11:43:11 pm	4																								84	4	65	4	93	2	63	3
10/03/2021	11:43:31 pm	4																								84	4	65	4	93	2	64	3
10/03/2021	11:43:51 pm	4																								84	4	66	4	93	2	61	3
10/03/2021	11:44:11 pm	4																								85	4	65	4	93	2	62	3
10/03/2021	11:44:31 pm	4																								85	4	64	4	93	3	62	3
10/03/2021	11:44:51 pm	4																								85	4	65	4	93	3	63	3
10/03/2021	11:45:11 pm	4																								84	4	65	4	93	3	63	3
10/03/2021	11:45:31 pm	4																								84	4	66	4	94	2	63	3
10/03/2021	11:45:51 pm	4																								85	4	66	4	93	2	61	4
10/03/2021	11:46:11 pm	4																								86	4	65	4	93	2	63	3
10/03/2021	11:46:31 pm	4																								84	4	66	4	93	2	64	3
10/03/2021	11:46:51 pm	4																								84	4	67	4	94	3	64	2
10/03/2021	11:47:11 pm	4																								85	4	68	4	93	2	65	3
10/03/2021	11:47:31 pm	4																								84	4	69	4	94	2	66	3
10/03/2021	11:47:51 pm	4																								86	4	70	4	94	2	65	3
10/03/2021	11:48:11 pm	4																								86	4	70	4	94	2	64	3
10/03/2021	11:48:31 pm	4																								85	4	70	4	94	2	65	3
10/03/2021	11:48:51 pm	4																								85	4	69	4	94	2	67	3
10/03/2021	11:49:11 pm	4																								85	4	70	4	93	2	67	3
10/03/2021	11:49:31 pm	4																								85	4	70	4	94	2	67	3
10/03/2021	11:49:51 pm	4																								84	4	71	4	95	2	67	3
10/03/2021	11:50:11 pm	4																								86	4	71	4	94	2	66	3
10/03/2021	11:50:31 pm	4																								86	4	71	4	95	2	64	4
10/03/2021	11:50:51 pm	4																								86	4	71	4	94	2	63	4
10/03/2021	11:51:11 pm	4																								87	4	71	4	94	2	65	3
10/03/2021	11:51:31 pm	4																								86	4	71	4	95	2	65	3
10/03/2021	11:51:51 pm	4																								86	4	71	4	94	2	64	3
10/03/2021	11:52:11 pm	4																								87	4	72	4	95	2	64	3
10/03/2021	11:52:31 pm	4																								85	4	72	4	95	2	64	4
10/03/2021	11:52:51 pm	4																								86	4	72	4	96	2	63	4
10/03/2021	11:53:11 pm	4																								86	4	72	4	95	2	65	3
10/03/2021	11:53:31 pm	4																								86	4	72	4	94	2	65	3
10/03/2021	11:53:51 pm	4																								86	4	72	4	95	2	64	3
10/03/2021	11:54:11 pm	4																								86	4	71	4	94	2	64	3
10/03/2021	11:54:31 pm	4																								86	4	72	4	95	2	64	4
10/03/2021	11:54:51 pm	4																								87	4	72	4	95	2	63	4
10/03/2021	11:55:11 pm	4																								87	4	72	4	95	2	65	3
10/03/2021	11:55:31 pm	4																								86	4	72	4	96	2	65	3
10/03/2021	11:55:51 pm	4																								86	4	72	4	95	2	64	3
10/03/2021	11:56:11 pm	4																								86	4	73	4	95	2	64	3
10/03/2021	11:56:31 pm	4																								85	4	72	4	94	2	64	4
10/03/2021	11:56:51 pm	4																								84	4	73	4	94	2	63	4
10/03/2021	11:57:11 pm	4																								84	4	73	4	93	2	65	3
10/03/2021	11:57:31 pm	4																								84	4	73	4	92	3	65	3
10/03/2021	11:57:51 pm	4																								83	4	73	4	92	3	64	3
10/03/2021	11:58:11 pm	4																								84	4	73	4	91	3	64	3
10/03/2021	11:58:31 pm	4																								83	4	73	4	91	3	66	3
10/03/2021	11:58:51 pm	4																								83	4	73	4	91	3	66	3
10/03/2021	11:59:11 pm	4																								83	4	73	4	92	2	66	3
10/03/2021	11:59:31 pm	4																								83	4	73	4	92	2	68	3
10/03/2021	11:59:51 pm	4																								83	4	74	4	91	2	68	3
10/04/2021	12:00:11 am	4																								83	4	74	4	91	2	68	3
10/04/2021	12:00:31 am	4																								83	4	74	4	91	2	66	3
10/04/2021	12:00:51 am	4																								82	4	74	4	91	2	64	3
10/04/2021	12:01:11 am	4																								82	4	74	4	91	2	66	3
10/04/2021	12:01:31 am	4																								81	4	74	4	91	2	66	3
10/04/2021	12:01:51 am	4																								81	4	74	4	90	2	66	3
10/04/2021	12:02:11 am	4																								81	4	75	4	90	2	68	3
10/04/2021	12:02:31 am	4																								80	4	75	4	88	3	68	3
10/04/2021	12:02:51 am	4																								81	4	74	4	90	2	68	3
10/04/2021	12:03:11 am	4																								81	4	75	4	90	3	66	3
10/04/2021	12:03:31 am	4																								81	4	75	4	90	3	64	3
10/04/2021	12:03:51 am	4																								81	4	75	4	89	2	66	3
10/04/2021	12:04:11 am	4																								81	4	75	4	90	2	66	3
10/04/2021	12:04:31 am	4																								81	4	75	4	89	3	66	3
10/04/2021	12:04:51 am	4																								81	4	75	4	89	3	68	3
10/04/2021	12:05:11 am	4																								80	4	75	4	89	3	68	3
10/04/2021	12:05:31 am	4																								81	4	75	4	89	3	68	3
10/04/2021	12:05:51 am	4																								81	4	74	4	89	3	68	3
10/04/2021	12:06:11 am	4																								81	4	75	4	88	3	68	3
10/04/2021	12:06:31 am	4																								82	4	76	4	89	3	68	3
10/04/2021	12:06:51 am	4																								81	4	75	4	89	3	68	3
10/04/2021	12:07:11 am	4																								82	4	75	4	89	3	68	3
10/04/2021	12:07:31 am	4																								81	4	77	4	89	3	68	3
10/04/2021	12:07:51 am	4																								81	4	76	4	89	3	70	3
10/04/2021	12:08:11 am	4																								81	4	76	4	89	3	70	3
10/04/2021	12:08:31 am	4																								81	4	75	4	89	3	72	3
10/04/2021	12:08:51 am	4																								82	4	76	4	89	3	72	3
10/04/2021	12:09:11 am	4																								81	4	75	4	89	3	72	3
10/04/2021	12:09:31 am	4																								82	4	76	4	89	3	72	3
10/04/2021	12:09:51 am	4																								82	4	75	4	89	3	72	3
10/04/2021	12:10:11 am	4																								83	4	76	4	89	3	71	3
10/04/2021	12:10:31 am	4																								83	4	75	4	89	3	71	3
10/04/2021	12:10:51 am	4																								83	4	76	4	89	3	71	3
10/04/2021	12:11:11 am	4																								83	4	76	4	89	3	68	3
10/04/2021	12:11:31 am	4																								83	4	75	4	89	3	70	3
10/04/2021	12:11:51 am	4																								84	4	76	4	89	3	70	3
10/04/2021	12:12:11 am	4																								85	4	76	4	89	3	72	3
10/04/2021	12:12:31 am	4																								85	4	75	4	89	3	72	3
10/04/2021	12:12:51 am	4																								85	4	76	4	90	3	72	3
10/04/2021	12:13:11 am	4																								85	4	75	4	90	3	72	3
10/04/2021	12:13:31 am	4																								86	4	75	4	90	3	72	3
10/04/2021	12:13:51 am	4																								86	4	75	4	90	3	71	3
10/04/2021	12:14:11 am	4																								86	4	75	4	90	3	71	3
10/04/2021	12:14:31 am	4																								86	4	75	4	90	3	71	3
10/04/2021	12:14:51 am	4																								86	4	74	4	90	3	68	3
10/04/2021	12:15:11 am	4																								87	4	74	4	90	3	70	3
10/04/2021	12:15:31 am	4																								87	4	73	4	90	3	70	3
10/04/2021	12:15:51 am	4																								87	4	73	4	90	3	72	3
10/04/2021	12:16:11 am	4																								86	4	73	4	91	2	72	3
10/04/2021	12:16:31 am	4																								87	4	73	4	91	3	72	3
10/04/2021	12:16:51 am	4																								87	4	73	4	91	2	72	3
10/04/2021	12:17:11 am	4																								87	4	72	4	91	2	72	3
10/04/2021	12:17:31 am	4																								87	4	73	4	91	3	71	3
10/04/2021	12:17:51 am	4																								87	4	73	4	91	3	71	3
10/04/2021	12:18:11 am	4																								87	4	73	4	91	2	71	3
10/04/2021	12:18:31 am	4																								87	4	73	4	91	2	72	3
10/04/2021	12:18:51 am	4																								87	4	73	4	91	3	72	3
10/04/2021	12:19:11 am	4																								87	4	73	4	91	2	72	3
10/04/2021	12:19:31 am	4																								87	4	73	4	91	2	72	3
10/04/2021	12:19:51 am	4																								87	4	73	4	91	2	72	3
10/04/2021	12:20:11 am	4																								87	4	73	4	91	2	71	3
10/04/2021	12:20:31 am	4																								87	4	73	4	91	2	71	3
10/04/2021	12:20:51 am	4																								86	4	73	4	92	2	71	3
10/04/2021	12:21:11 am	4																								87	4	74	4	92	2	68	3
10/04/2021	12:21:31 am	4																								87	4	73	4	91	3	70	3
10/04/2021	12:21:51 am	4																								87	4	73	4	91	2	70	3
10/04/2021	12:22:11 am	4																								87	4	73	4	91	2	72	3
10/04/2021	12:22:31 am	4																								87	4	73	4	91	2	72	3
10/04/2021	12:22:51 am	4																								87	4	73	4	92	2	72	3
10/04/2021	12:23:11 am	4																								87	4	73	4	91	2	72	3
10/04/2021	12:23:31 am	4																								87	4	74	4	91	2	72	3
10/04/2021	12:23:51 am	4																								87	4	74	4	92	2	71	3
10/04/2021	12:24:11 am	4																								87	4	74	4	92	2	71	3
10/04/2021	12:24:31 am	4																								88	4	74	4	92	2	71	3
10/04/2021	12:24:51 am	4																								88	4	74	4	92	2	72	3
10/04/2021	12:25:11 am	4																								88	4	74	4	92	2	72	3
10/04/2021	12:25:31 am	4																								88	4	75	4	92	2	72	3
10/04/2021	12:25:51 am	4																								88	4	75	4	93	2	72	3
10/04/2021	12:26:11 am	4																								88	4	74	4	93	2	72	3
10/04/2021	12:26:31 am	4																								88	4	75	4	93	2	71	3
10/04/2021	12:26:51 am	4																								88	4	75	4	93	2	71	3
10/04/2021	12:27:11 am	4																								88	4	75	4	93	2	71	3
10/04/2021	12:27:31 am	4																								88	4	75	4	93	2	68	3
10/04/2021	12:27:51 am	4																								88	4	76	4	93	2	70	3
10/04/2021	12:28:11 am	4																								88	4	76	4	93	2	70	3
10/04/2021	12:28:31 am	4																								88	4	76	4	93	2	72	3
10/04/2021	12:28:51 am	4																								88	4	76	4	93	2	72	3
10/04/2021	12:29:11 am	4																								88	4	77	4	93	2	72	3
10/04/2021	12:29:31 am	4																								88	4	77	4	93	2	72	3
10/04/2021	12:29:51 am	4																								88	4	77	4	93	2	72	3
10/04/2021	12:30:11 am	4																								88	4	77	4	93	2	71	3
10/04/2021	12:30:31 am	4																								88	4	77	4	93	2	71	3
10/04/2021	12:30:51 am	4																								88	4	77	4	93	2	71	3
10/04/2021	12:31:11 am	4																								88	4	77	4	93	2	74	3
10/04/2021	12:31:31 am	4																								88	4	77	4	93	2	74	3
10/04/2021	12:31:51 am	4																								88	4	77	4	94	1	74	3
10/04/2021	12:32:11 am	4																								88	4	77	4	94	1	73	3
10/04/2021	12:32:31 am	4																								88	4	77	4	94	1	73	3
10/04/2021	12:32:51 am	4																								88	4	77	4	94	1	73	3
10/04/2021	12:33:11 am	4																								88	4	78	4	94	1	75	3
10/04/2021	12:33:31 am	4																								88	4	77	4	94	1	76	3
10/04/2021	12:33:51 am	4																								88	4	77	4	94	1	75	3
10/04/2021	12:34:11 am	4																								88	4	77	4	94	1	74	3
10/04/2021	12:34:31 am	4																								88	4	77	4	94	1	74	3
10/04/2021	12:34:51 am	4																								88	4	78	4	94	2	74	3
10/04/2021	12:35:11 am	4																								88	4	78	4	94	1	74	3
10/04/2021	12:35:31 am	4																								88	4	78	4	94	1	74	3
10/04/2021	12:35:51 am	4																								88	4	79	4	95	1	73	3
10/04/2021	12:36:11 am	4																								88	4	79	4	95	1	73	3
10/04/2021	12:36:31 am	4																								88	4	79	4	94	1	73	3
10/04/2021	12:36:51 am	4																								88	4	79	4	92	2	75	3
10/04/2021	12:37:11 am	4																								88	4	79	4	94	1	76	3
10/04/2021	12:37:31 am	4																								88	4	79	4	94	1	75	3
10/04/2021	12:37:51 am	4																								88	4	79	4	94	1	74	3
10/04/2021	12:38:11 am	4																								88	4	79	4	94	1	74	3
10/04/2021	12:38:31 am	4																								88	4	79	4	94	1	76	3
10/04/2021	12:38:51 am	4																								88	4	79	4	94	2	76	3
10/04/2021	12:39:11 am	4																								88	4	79	4	94	1	76	3
10/04/2021	12:39:31 am	4																								88	4	80	4	94	1	77	3
10/04/2021	12:39:51 am	4																								88	4	79	4	94	1	77	3
10/04/2021	12:40:11 am	4																								88	4	80	4	94	1	77	3
10/04/2021	12:40:31 am	4																								88	4	79	4	95	1	77	3
10/04/2021	12:40:51 am	4																								88	4	80	4	95	1	77	3
10/04/2021	12:41:11 am	4																								88	4	80	4	95	1	77	3
10/04/2021	12:41:31 am	4																								88	4	80	4	95	1	76	3
10/04/2021	12:41:51 am	4																								88	4	80	4	95	1	76	3
10/04/2021	12:42:11 am	4																								88	4	80	4	95	1	76	3
10/04/2021	12:42:31 am	4																								88	4	80	4	95	1	76	3
10/04/2021	12:42:51 am	4																								88	4	80	4	95	1	77	3
10/04/2021	12:43:11 am	4																								88	4	80	4	95	1	77	3
10/04/2021	12:43:31 am	4																								88	4	80	4	95	1	77	3
10/04/2021	12:43:51 am	4																								88	4	81	4	95	1	77	3
10/04/2021	12:44:11 am	4																								88	4	81	4	95	1	76	3
10/04/2021	12:44:31 am	4																								88	4	81	4	95	1	76	3
10/04/2021	12:44:51 am	4																								88	4	81	4	95	1	76	3
10/04/2021	12:45:11 am	4																								88	4	81	4	95	1	77	3
10/04/2021	12:45:31 am	4																								88	4	82	4	95	1	77	3
10/04/2021	12:45:51 am	4																								88	4	81	4	95	1	77	3
10/04/2021	12:46:11 am	4																								88	4	81	4	95	1	77	3
10/04/2021	12:46:31 am	4																								88	4	82	4	95	1	77	3
10/04/2021	12:46:51 am	4																								88	4	82	4	95	1	77	3
10/04/2021	12:47:11 am	4																								88	4	82	4	95	1	76	3
10/04/2021	12:47:31 am	4																								88	4	82	4	95	1	76	3
10/04/2021	12:47:51 am	4																								88	4	81	4	95	1	76	3
10/04/2021	12:48:11 am	4																								88	4	81	4	95	1	76	3
10/04/2021	12:48:31 am	4																								88	4	80	4	95	1	77	3
10/04/2021	12:48:51 am	4																								88	4	83	4	95	1	77	3
10/04/2021	12:49:11 am	4																								88	4	77	4	95	1	77	3
10/04/2021	12:49:31 am	4																								88	4	73	4	95	1	77	3
10/04/2021	12:49:51 am	4																								88	4	72	4	95	1	76	3
10/04/2021	12:50:11 am	4																								88	4	72	4	95	1	76	3
10/04/2021	12:50:31 am	4																								88	4	72	4	95	1	76	3
10/04/2021	12:50:51 am	4																								88	4	72	4	95	1	77	3
10/04/2021	12:51:11 am	4																								87	4	72	4	95	1	77	3
10/04/2021	12:51:31 am	4																								88	4	72	4	96	1	77	3
10/04/2021	12:51:51 am	4																								88	4	72	4	96	1	77	3
10/04/2021	12:52:11 am	4																								88	4	73	4	96	1	77	3
10/04/2021	12:52:31 am	4																								88	4	73	4	96	1	77	3
10/04/2021	12:52:51 am	4																								88	4	74	4	95	2	76	3
10/04/2021	12:53:11 am	4																								87	4	75	4	95	1	76	3
10/04/2021	12:53:31 am	4																								88	4	75	4	95	1	76	3
10/04/2021	12:53:51 am	4																								88	4	75	4	95	1	76	3
10/04/2021	12:54:11 am	4																								88	4	76	4	95	1	77	3
10/04/2021	12:54:31 am	4																								88	4	75	4	95	1	77	3
10/04/2021	12:54:51 am	4																								88	4	76	4	95	1	77	3
10/04/2021	12:55:11 am	4																								88	4	76	4	95	1	77	3
10/04/2021	12:55:31 am	4																								88	4	76	4	95	1	76	3
10/04/2021	12:55:51 am	4																								88	4	77	4	95	1	76	3
10/04/2021	12:56:11 am	4																								88	4	77	4	95	1	76	3
10/04/2021	12:56:31 am	4																								88	4	77	4	95	1	77	3
10/04/2021	12:56:51 am	4																								88	4	77	4	95	1	77	3
10/04/2021	12:57:11 am	4																								87	4	78	4	95	1	77	3
10/04/2021	12:57:31 am	4																								87	4	78	4	95	1	77	3
10/04/2021	12:57:51 am	4																								87	4	78	4	95	1	77	3
10/04/2021	12:58:11 am	4																								88	4	78	4	95	1	77	3
10/04/2021	12:58:31 am	4																								87	4	78	4	95	1	76	3
10/04/2021	12:58:51 am	4																								87	4	77	4	95	1	76	3
10/04/2021	12:59:11 am	4																								87	4	77	4	95	1	76	3
10/04/2021	12:59:31 am	4																								87	4	77	4	95	1	76	3
10/04/2021	12:59:51 am	4																								87	4	76	4	95	1	77	3
10/04/2021	1:00:11 am	4																								87	4	76	4	95	1	77	3
10/04/2021	1:00:31 am	4																								87	4	76	4	95	1	77	3
10/04/2021	1:00:51 am	4																								87	4	75	4	95	1	77	3
10/04/2021	1:01:11 am	4																								87	4	75	4	95	1	77	3
10/04/2021	1:01:31 am	4																								86	4	75	4	95	1	77	3
10/04/2021	1:01:51 am	4																								87	4	75	4	95	1	77	3
10/04/2021	1:02:11 am	4																								87	4	75	4	95	1	77	3
10/04/2021	1:02:31 am	4																								87	4	76	4	94	1	77	3
10/04/2021	1:02:51 am	4																								87	4	76	4	94	1	77	3
10/04/2021	1:03:11 am	4																								87	4	78	4	94	1	76	3
10/04/2021	1:03:31 am	4																								86	4	75	4	94	1	76	3
10/04/2021	1:03:51 am	4																								85	4	75	4	94	1	76	3
10/04/2021	1:04:11 am	4																								86	4	75	4	94	1	76	3
10/04/2021	1:04:31 am	4																								86	4	74	4	93	2	77	3
10/04/2021	1:04:51 am	4																								86	4	73	4	94	1	77	3
10/04/2021	1:05:11 am	4																								86	4	71	4	93	1	77	3
10/04/2021	1:05:31 am	4																								86	4	70	4	94	1	77	3
10/04/2021	1:05:51 am	4																								86	4	70	4	93	1	76	3
10/04/2021	1:06:11 am	4																								85	4	68	4	94	1	76	3
10/04/2021	1:06:31 am	4																								86	4	69	4	94	1	76	3
10/04/2021	1:06:51 am	4																								86	4	69	4	94	1	77	3
10/04/2021	1:07:11 am	4																								85	4	70	4	94	1	77	3
10/04/2021	1:07:31 am	4																								86	4	70	4	94	1	77	3
10/04/2021	1:07:51 am	4																								86	4	70	4	94	1	77	3
10/04/2021	1:08:11 am	4																								85	4	70	4	94	1	77	3
10/04/2021	1:08:31 am	4																								86	4	70	4	93	1	77	3
10/04/2021	1:08:51 am	4																								86	4	70	4	93	1	76	3
10/04/2021	1:09:11 am	4																								86	4	70	4	93	1	76	3
10/04/2021	1:09:31 am	4																								85	4	70	4	93	1	76	3
10/04/2021	1:09:51 am	4																								85	4	71	4	94	1	76	3
10/04/2021	1:10:11 am	4																								86	4	71	4	93	1	72	3
10/04/2021	1:10:31 am	4																								85	4	71	4	93	1	72	3
10/04/2021	1:10:51 am	4																								85	4	70	4	92	1	72	3
10/04/2021	1:11:11 am	4																								84	4	70	4	93	1	71	3
10/04/2021	1:11:31 am	4																								85	4	70	4	92	2	71	3
10/04/2021	1:11:51 am	4																								85	4	70	4	92	2	71	3
10/04/2021	1:12:11 am	4																								85	4	70	4	92	2	74	3
10/04/2021	1:12:31 am	4																								85	4	70	4	92	2	74	3
10/04/2021	1:12:51 am	4																								84	4	71	4	92	2	74	3
10/04/2021	1:13:11 am	4																								84	4	71	4	92	2	73	3
10/04/2021	1:13:31 am	4																								84	4	72	4	92	2	73	3
10/04/2021	1:13:51 am	4																								84	4	71	4	92	2	73	3
10/04/2021	1:14:11 am	4																								84	4	72	4	92	2	75	3
10/04/2021	1:14:31 am	4																								84	4	72	4	93	2	76	3
10/04/2021	1:14:51 am	4																								85	4	72	4	93	2	75	3
10/04/2021	1:15:11 am	4																								85	4	72	4	93	2	74	3
10/04/2021	1:15:31 am	4																								85	4	73	4	93	2	74	3
10/04/2021	1:15:51 am	4																								86	4	74	4	93	2	74	3
10/04/2021	1:16:11 am	4																								85	4	74	4	93	2	74	3
10/04/2021	1:16:31 am	4																								85	4	74	4	93	1	74	3
10/04/2021	1:16:51 am	4																								85	4	74	4	93	1	73	3
10/04/2021	1:17:11 am	4																								85	4	75	4	93	2	73	3
10/04/2021	1:17:31 am	4																								85	4	75	4	93	1	73	3
10/04/2021	1:17:51 am	4																								85	4	76	4	93	1	75	3
10/04/2021	1:18:11 am	4																								85	4	76	4	93	1	76	3
10/04/2021	1:18:31 am	4																								85	4	77	4	93	2	77	3
10/04/2021	1:18:51 am	4																								85	4	78	4	93	1	74	3
10/04/2021	1:19:11 am	4																								85	4	78	4	93	1	78	3
10/04/2021	1:19:31 am	4																								85	4	77	4	93	2	74	3
10/04/2021	1:19:51 am	4																								85	4	78	4	93	1	74	3
10/04/2021	1:20:11 am	4																								85	4	78	4	93	2	76	3
10/04/2021	1:20:31 am	4																								85	4	78	4	93	1	76	3
10/04/2021	1:20:51 am	4																								85	4	78	4	93	2	76	3
10/04/2021	1:21:11 am	4																								83	4	79	4	93	2	75	3
10/04/2021	1:21:31 am	4																								84	4	78	4	92	2	76	3
10/04/2021	1:21:51 am	4																								83	4	79	4	92	2	77	3
10/04/2021	1:22:11 am	4																								83	4	78	4	92	2	76	3
10/04/2021	1:22:31 am	4																								83	4	78	4	92	2	78	3
10/04/2021	1:22:51 am	4																								83	4	79	4	91	2	78	3
10/04/2021	1:23:11 am	4																								83	4	80	4	91	2	78	3
10/04/2021	1:23:31 am	4																								83	4	79	4	90	2	78	3
10/04/2021	1:23:51 am	4																								83	4	81	4	90	2	78	3
10/04/2021	1:24:11 am	4																								83	4	80	4	90	2	78	3
10/04/2021	1:24:31 am	4																								83	4	81	4	90	2	80	3
10/04/2021	1:24:51 am	4																								84	4	81	4	90	2	80	3
10/04/2021	1:25:11 am	4																								84	4	81	4	91	2	80	3
10/04/2021	1:25:31 am	4																								84	4	81	4	91	2	80	3
10/04/2021	1:25:51 am	4																								82	4	81	4	91	2	78	3
10/04/2021	1:26:11 am	4																								83	4	81	4	90	2	78	3
10/04/2021	1:26:31 am	4																								82	4	81	4	90	2	78	3
10/04/2021	1:26:51 am	4																								83	4	81	4	90	2	78	3
10/04/2021	1:27:11 am	4																								82	4	80	4	90	2	78	3
10/04/2021	1:27:31 am	4																								83	4	82	3	89	2	78	3
10/04/2021	1:27:51 am	4																								82	4	81	4	89	2	80	3
10/04/2021	1:28:11 am	4																								81	4	80	4	89	2	80	3
10/04/2021	1:28:31 am	4																								82	4	80	4	89	2	80	3
10/04/2021	1:28:51 am	4																								82	4	80	4	89	2	80	3
10/04/2021	1:29:11 am	4																								81	4	80	4	89	2	78	3
10/04/2021	1:29:31 am	4																								81	4	80	4	89	2	78	3
10/04/2021	1:29:51 am	4																								81	4	80	4	89	2	78	3
10/04/2021	1:30:11 am	4																								81	4	81	4	88	2	78	3
10/04/2021	1:30:31 am	4																								80	4	81	4	88	2	78	3
10/04/2021	1:30:51 am	4																								80	4	81	4	87	2	78	3
10/04/2021	1:31:11 am	4																								79	4	81	4	86	2	80	3
10/04/2021	1:31:31 am	4																								80	4	81	4	86	2	80	3
10/04/2021	1:31:51 am	4																								80	4	83	3	86	3	80	3
10/04/2021	1:32:11 am	4																								80	4	81	4	86	2	80	3
10/04/2021	1:32:31 am	4																								80	4	82	4	86	2	78	3
10/04/2021	1:32:51 am	4																								80	4	82	4	86	3	78	3
10/04/2021	1:33:11 am	4																								79	4	82	4	86	2	78	3
10/04/2021	1:33:31 am	4																								79	4	82	4	86	2	78	3
10/04/2021	1:33:51 am	4																								79	4	82	4	85	3	78	3
10/04/2021	1:34:11 am	4																								79	4	83	4	85	2	78	3
10/04/2021	1:34:31 am	4																								79	4	82	4	85	3	80	3
10/04/2021	1:34:51 am	4																								79	4	82	4	85	3	80	3
10/04/2021	1:35:11 am	4																								79	4	82	3	84	3	80	3
10/04/2021	1:35:31 am	4																								79	4	82	4	83	3	80	3
10/04/2021	1:35:51 am	4																								79	4	82	4	83	3	80	3
10/04/2021	1:36:11 am	4																								79	4	83	4	84	3	80	3
10/04/2021	1:36:31 am	4																								79	4	82	4	83	3	80	3
10/04/2021	1:36:51 am	4																								80	4	82	4	84	2	80	3
10/04/2021	1:37:11 am	4																								80	4	79	4	85	2	77	3
10/04/2021	1:37:31 am	4																								80	4	78	4	86	2	76	3
10/04/2021	1:37:51 am	4																								80	4	78	4	85	3	78	3
10/04/2021	1:38:11 am	4																								80	4	79	4	85	3	78	3
10/04/2021	1:38:31 am	4																								81	4	80	4	85	3	78	3
10/04/2021	1:38:51 am	4																								81	4	79	4	85	3	78	3
10/04/2021	1:39:11 am	4																								81	4	81	4	86	3	78	3
10/04/2021	1:39:31 am	4																								81	4	80	4	85	3	78	3
10/04/2021	1:39:51 am	4																								80	4	81	4	84	3	80	3
10/04/2021	1:40:11 am	4																								80	4	81	4	84	3	80	3
10/04/2021	1:40:31 am	4																								80	4	81	4	85	3	80	3
10/04/2021	1:40:51 am	4																								79	4	81	4	86	3	80	3
10/04/2021	1:41:11 am	4																								79	4	81	4	85	3	78	3
10/04/2021	1:41:31 am	4																								80	4	81	4	85	3	78	3
10/04/2021	1:41:51 am	4																								80	4	81	4	85	3	78	3
10/04/2021	1:42:11 am	4																								79	4	81	4	84	3	78	3
10/04/2021	1:42:31 am	4																								79	4	80	4	84	3	78	3
10/04/2021	1:42:51 am	4																								80	4	82	3	84	3	78	3
10/04/2021	1:43:11 am	4																								80	4	81	4	84	3	80	3
10/04/2021	1:43:31 am	4																								80	4	80	4	85	3	80	3
10/04/2021	1:43:51 am	4																								80	4	80	4	86	3	80	3
10/04/2021	1:44:11 am	4																								80	4	80	4	87	3	80	3
10/04/2021	1:44:31 am	4																								80	4	80	4	86	3	78	3
10/04/2021	1:44:51 am	4																								80	4	80	4	86	3	78	3
10/04/2021	1:45:11 am	4																								81	4	80	4	86	3	78	3
10/04/2021	1:45:31 am	4																								80	4	81	4	87	3	78	3
10/04/2021	1:45:51 am	4																								80	4	81	4	87	3	78	3
10/04/2021	1:46:11 am	4																								80	4	81	4	86	3	78	3
10/04/2021	1:46:31 am	4																								81	4	81	4	87	3	80	3
10/04/2021	1:46:51 am	4																								80	4	81	4	88	3	80	3
10/04/2021	1:47:11 am	4																								81	4	83	3	88	3	80	3
10/04/2021	1:47:31 am	4																								81	4	81	4	88	3	80	3
10/04/2021	1:47:51 am	4																								81	4	82	4	88	3	78	3
10/04/2021	1:48:11 am	4																								82	4	82	4	88	2	78	3
10/04/2021	1:48:31 am	4																								81	4	82	4	89	3	78	3
10/04/2021	1:48:51 am	4																								81	4	82	4	88	2	78	3
10/04/2021	1:49:11 am	4																								81	4	82	4	88	3	78	3
10/04/2021	1:49:31 am	4																								81	4	83	4	88	3	78	3
10/04/2021	1:49:51 am	4																								82	4	82	4	88	3	80	3
10/04/2021	1:50:11 am	4																								81	4	82	4	88	3	80	3
10/04/2021	1:50:31 am	4																								81	4	82	3	88	3	80	3
10/04/2021	1:50:51 am	4																								81	4	82	4	88	2	80	3
10/04/2021	1:51:11 am	4																								82	4	82	4	88	3	80	3
10/04/2021	1:51:31 am	4																								82	4	83	4	89	2	80	3
10/04/2021	1:51:51 am	4																								82	4	82	4	88	3	80	3
10/04/2021	1:52:11 am	4																								82	4	82	4	89	2	80	3
10/04/2021	1:52:31 am	4																								82	4	79	4	88	3	77	3
10/04/2021	1:52:51 am	4																								82	4	78	4	89	3	76	3
10/04/2021	1:53:11 am	4																								83	4	78	4	89	3	78	3
10/04/2021	1:53:31 am	4																								82	4	79	4	88	3	78	3
10/04/2021	1:53:51 am	4																								82	4	80	4	87	3	78	3
10/04/2021	1:54:11 am	4																								83	4	79	4	87	4	78	3
10/04/2021	1:54:31 am	4																								83	4	81	4	86	4	78	3
10/04/2021	1:54:51 am	4																								82	4	80	4	86	3	78	3
10/04/2021	1:55:11 am	4																								82	4	81	4	84	4	80	3
10/04/2021	1:55:31 am	4																								81	4	81	4	84	4	80	3
10/04/2021	1:55:51 am	4																								81	4	81	4	84	4	80	3
10/04/2021	1:56:11 am	4																								82	4	81	4	84	3	80	3
10/04/2021	1:56:31 am	4																								81	4	81	4	84	3	78	3
10/04/2021	1:56:51 am	4																								80	4	81	4	84	4	78	3
10/04/2021	1:57:11 am	4																								81	4	81	4	83	4	78	3
10/04/2021	1:57:31 am	4																								81	4	81	4	83	3	78	3
10/04/2021	1:57:51 am	4																								81	4	80	4	83	4	78	3
10/04/2021	1:58:11 am	4																								81	4	82	3	84	3	78	3
10/04/2021	1:58:31 am	4																								81	4	81	4	86	3	80	3
10/04/2021	1:58:51 am	4																								81	4	80	4	85	3	80	3
10/04/2021	1:59:11 am	4																								82	4	80	4	85	3	80	3
10/04/2021	1:59:31 am	4																								82	4	80	4	85	3	80	3
10/04/2021	1:59:51 am	4																								82	4	80	4	85	3	78	3
10/04/2021	2:00:11 am	4																								82	4	80	4	86	3	78	3
10/04/2021	2:00:31 am	4																								81	4	80	4	86	3	78	3
10/04/2021	2:00:51 am	4																								81	4	81	4	85	3	78	3
10/04/2021	2:01:11 am	4																								82	4	81	4	85	3	78	3
10/04/2021	2:01:31 am	4																								82	4	81	4	85	3	78	3
10/04/2021	2:01:51 am	4																								82	4	81	4	86	3	80	3
10/04/2021	2:02:11 am	4																								81	4	81	4	86	3	80	3
10/04/2021	2:02:31 am	4																								82	4	83	3	86	3	80	3
10/04/2021	2:02:51 am	4																								82	4	81	4	86	3	80	3
10/04/2021	2:03:11 am	4																								82	4	82	4	86	3	78	3
10/04/2021	2:03:31 am	4																								83	4	82	4	87	3	78	3
10/04/2021	2:03:51 am	4																								82	4	82	4	87	3	78	3
10/04/2021	2:04:11 am	4																								82	4	82	4	87	3	78	3
10/04/2021	2:04:31 am	4																								82	4	82	4	87	3	78	3
10/04/2021	2:04:51 am	4																								83	4	83	4	87	3	78	3
10/04/2021	2:05:11 am	4																								83	4	82	4	88	3	80	3
10/04/2021	2:05:31 am	4																								82	4	82	4	88	3	80	3
10/04/2021	2:05:51 am	4																								82	4	82	3	88	3	80	3
10/04/2021	2:06:11 am	4																								83	4	82	4	88	3	80	3
10/04/2021	2:06:31 am	4																								83	4	82	4	88	3	80	3
10/04/2021	2:06:51 am	4																								82	4	83	4	88	3	80	3
10/04/2021	2:07:11 am	4																								82	4	82	4	87	3	80	3
10/04/2021	2:07:31 am	4																								82	4	82	4	88	3	80	3
10/04/2021	2:07:51 am	4																								81	4	79	4	89	3	77	3
10/04/2021	2:08:11 am	4																								81	4	78	4	89	3	76	3
10/04/2021	2:08:31 am	4																								82	4	78	4	89	3	78	3
10/04/2021	2:08:51 am	4																								82	4	79	4	89	3	78	3
10/04/2021	2:09:11 am	4																								82	4	80	4	89	3	78	3
10/04/2021	2:09:31 am	4																								82	4	79	4	89	3	78	3
10/04/2021	2:09:51 am	4																								82	4	81	4	90	3	78	3
10/04/2021	2:10:11 am	4																								81	4	80	4	90	3	78	3
10/04/2021	2:10:31 am	4																								81	4	81	4	89	3	80	3
10/04/2021	2:10:51 am	4																								82	4	81	4	89	3	80	3
10/04/2021	2:11:11 am	4																								82	4	81	4	89	3	80	3
10/04/2021	2:11:31 am	4																								82	4	81	4	89	3	80	3
10/04/2021	2:11:51 am	4																								82	4	81	4	89	3	78	3
10/04/2021	2:12:11 am	4																								83	4	81	4	89	3	78	3
10/04/2021	2:12:31 am	4																								82	4	81	4	89	3	78	3
10/04/2021	2:12:51 am	4																								82	4	81	4	89	3	78	3
10/04/2021	2:13:11 am	4																								82	4	80	4	89	3	78	3
10/04/2021	2:13:31 am	4																								83	4	82	3	89	3	78	3
10/04/2021	2:13:51 am	4																								83	4	81	4	89	3	80	3
10/04/2021	2:14:11 am	4																								82	4	80	4	89	3	80	3
10/04/2021	2:14:31 am	4																								82	4	80	4	89	3	80	3
10/04/2021	2:14:51 am	4																								82	4	80	4	89	3	80	3
10/04/2021	2:15:11 am	4																								82	4	80	4	89	3	78	3
10/04/2021	2:15:31 am	4																								82	4	80	4	89	3	78	3
10/04/2021	2:15:51 am	4																								83	4	80	4	89	3	78	3
10/04/2021	2:16:11 am	4																								84	4	81	4	89	3	78	3
10/04/2021	2:16:31 am	4																								80	4	81	4	89	3	78	3
10/04/2021	2:16:51 am	4																								81	4	81	4	89	3	78	3
10/04/2021	2:17:11 am	4																								81	4	81	4	88	3	80	3
10/04/2021	2:17:31 am	4																								82	4	81	4	86	3	80	3
10/04/2021	2:17:51 am	4																								82	4	83	3	87	3	80	3
10/04/2021	2:18:11 am	4																								82	4	81	4	88	3	80	3
10/04/2021	2:18:31 am	4																								82	4	82	4	88	3	78	3
10/04/2021	2:18:51 am	4																								80	4	82	4	88	3	78	3
10/04/2021	2:19:11 am	4																								79	4	82	4	86	3	78	3
10/04/2021	2:19:31 am	4																								78	4	82	4	84	3	78	3
10/04/2021	2:19:51 am	4																								78	4	82	4	81	4	78	3
10/04/2021	2:20:11 am	4																								80	4	83	4	81	3	78	3
10/04/2021	2:20:31 am	4																								79	4	82	4	82	3	80	3
10/04/2021	2:20:51 am	4																								78	4	82	4	82	3	80	3
10/04/2021	2:21:11 am	4																								79	4	82	3	82	3	80	3
10/04/2021	2:21:31 am	4																								80	4	82	4	84	3	80	3
10/04/2021	2:21:51 am	4																								80	4	82	4	85	3	80	3
10/04/2021	2:22:11 am	4																								80	4	83	4	85	3	80	3
10/04/2021	2:22:31 am	4																								81	4	82	4	85	3	80	3
10/04/2021	2:22:51 am	4																								81	4	82	4	86	3	80	3
10/04/2021	2:23:11 am	4																								82	4	79	4	88	3	77	3
10/04/2021	2:23:31 am	4																								83	4	78	4	88	3	76	3
10/04/2021	2:23:51 am	4																								82	4	78	4	87	3	78	3
10/04/2021	2:24:11 am	4																								81	4	79	4	88	3	78	3
10/04/2021	2:24:31 am	4																								82	4	80	4	87	3	78	3
10/04/2021	2:24:51 am	4																								82	4	79	4	88	3	78	3
10/04/2021	2:25:11 am	4																								83	4	81	4	88	3	78	3
10/04/2021	2:25:31 am	4																								83	4	80	4	88	3	78	3
10/04/2021	2:25:51 am	4																								82	4	81	4	88	3	80	3
10/04/2021	2:26:11 am	4																								81	4	81	4	88	3	80	3
10/04/2021	2:26:31 am	4																								81	4	81	4	88	3	80	3
10/04/2021	2:26:51 am	4																								82	4	81	4	88	3	80	3
10/04/2021	2:27:11 am	4																								82	4	81	4	88	3	78	3
10/04/2021	2:27:31 am	4																								81	4	81	4	88	3	78	3
10/04/2021	2:27:51 am	4																								81	4	81	4	88	3	78	3
10/04/2021	2:28:11 am	4																								81	4	81	4	88	3	78	3
10/04/2021	2:28:31 am	4																								81	4	80	4	88	3	78	3
10/04/2021	2:28:51 am	4																								82	4	82	3	88	3	78	3
10/04/2021	2:29:11 am	4																								82	4	81	4	88	3	80	3
10/04/2021	2:29:31 am	4																								82	4	80	4	89	3	80	3
10/04/2021	2:29:51 am	4																								81	4	80	4	89	2	80	3
10/04/2021	2:30:11 am	4																								81	4	80	4	89	2	80	3
10/04/2021	2:30:31 am	4																								81	4	80	4	89	3	78	3
10/04/2021	2:30:51 am	4																								82	4	80	4	89	3	78	3
10/04/2021	2:31:11 am	4																								82	4	80	4	89	2	78	3
10/04/2021	2:31:31 am	4																								82	4	81	4	89	3	78	3
10/04/2021	2:31:51 am	4																								82	4	81	4	89	3	78	3
10/04/2021	2:32:11 am	4																								81	4	81	4	89	2	78	3
10/04/2021	2:32:31 am	4																								81	4	81	4	89	2	80	3
10/04/2021	2:32:51 am	4																								81	4	81	4	89	2	80	3
10/04/2021	2:33:11 am	4																								81	4	83	3	89	2	80	3
10/04/2021	2:33:31 am	4																								82	4	81	4	89	2	80	3
10/04/2021	2:33:51 am	4																								82	4	82	4	90	2	78	3
10/04/2021	2:34:11 am	4																								83	4	82	4	90	2	78	3
10/04/2021	2:34:31 am	4																								84	4	82	4	90	2	78	3
10/04/2021	2:34:51 am	4																								83	4	82	4	90	2	78	3
10/04/2021	2:35:11 am	4																								83	4	82	4	90	2	78	3
10/04/2021	2:35:31 am	4																								83	4	83	4	90	2	78	3
10/04/2021	2:35:51 am	4																								83	4	82	4	90	2	80	3
10/04/2021	2:36:11 am	4																								84	4	82	4	90	2	80	3
10/04/2021	2:36:31 am	4																								83	4	82	3	90	2	80	3
10/04/2021	2:36:51 am	4																								83	4	82	4	90	2	80	3
10/04/2021	2:37:11 am	4																								83	4	82	4	90	2	80	3
10/04/2021	2:37:31 am	4																								83	4	83	4	90	2	80	3
10/04/2021	2:37:51 am	4																								83	4	82	4	90	2	80	3
10/04/2021	2:38:11 am	4																								84	4	82	4	90	2	80	3
10/04/2021	2:38:31 am	4																								85	4	79	4	90	2	77	3
10/04/2021	2:38:51 am	4																								86	4	78	4	90	2	76	3
10/04/2021	2:39:11 am	4																								86	4	78	4	89	2	78	3
10/04/2021	2:39:31 am	4																								84	4	79	4	89	2	78	3
10/04/2021	2:39:51 am	4																								83	4	80	4	89	2	78	3
10/04/2021	2:40:11 am	4																								83	4	79	4	89	2	78	3
10/04/2021	2:40:31 am	4																								82	4	81	4	89	2	78	3
10/04/2021	2:40:51 am	4																								82	4	80	4	88	2	78	3
10/04/2021	2:41:11 am	4																								81	4	81	4	88	2	80	3
10/04/2021	2:41:31 am	4																								82	4	81	4	88	2	80	3
10/04/2021	2:41:51 am	4																								81	4	81	4	87	2	80	3
10/04/2021	2:42:11 am	4																								81	4	81	4	86	2	80	3
10/04/2021	2:42:31 am	4																								80	4	81	4	86	2	78	3
10/04/2021	2:42:51 am	4																								80	4	81	4	85	3	78	3
10/04/2021	2:43:11 am	4																								80	4	81	4	85	2	78	3
10/04/2021	2:43:31 am	4																								79	4	81	4	85	3	78	3
10/04/2021	2:43:51 am	4																								79	4	80	4	84	3	78	3
10/04/2021	2:44:11 am	4																								79	4	82	3	84	3	78	3
10/04/2021	2:44:31 am	4																								80	4	81	4	84	3	80	3
10/04/2021	2:44:51 am	4																								80	4	80	4	84	3	80	3
10/04/2021	2:45:11 am	4																								81	4	80	4	84	3	80	3
10/04/2021	2:45:31 am	4																								80	4	80	4	84	3	80	3
10/04/2021	2:45:51 am	4																								81	4	80	4	83	3	78	3
10/04/2021	2:46:11 am	4																								80	4	80	4	83	3	78	3
10/04/2021	2:46:31 am	4																								79	4	80	4	82	3	78	3
10/04/2021	2:46:51 am	4																								78	4	81	4	81	3	78	3
10/04/2021	2:47:11 am	4																								78	4	81	4	81	3	78	3
10/04/2021	2:47:31 am	4																								78	4	81	4	81	3	78	3
10/04/2021	2:47:51 am	4																								78	4	81	4	81	3	80	3
10/04/2021	2:48:11 am	4																								79	4	81	4	81	3	80	3
10/04/2021	2:48:31 am	4																								78	4	83	3	82	3	80	3
10/04/2021	2:48:51 am	4																								78	4	81	4	82	3	80	3
10/04/2021	2:49:11 am	4																								77	4	82	4	81	3	78	3
10/04/2021	2:49:31 am	4																								77	4	82	4	81	2	78	3
10/04/2021	2:49:51 am	4																								78	4	82	4	81	3	78	3
10/04/2021	2:50:11 am	4																								78	4	82	4	82	3	78	3
10/04/2021	2:50:31 am	4																								77	4	82	4	84	2	78	3
10/04/2021	2:50:51 am	4																								77	4	83	4	82	3	78	3
10/04/2021	2:51:11 am	4																								77	4	82	4	80	3	80	3
10/04/2021	2:51:31 am	4																								75	4	82	4	79	3	80	3
10/04/2021	2:51:51 am	4																								75	4	82	3	77	3	80	3
10/04/2021	2:52:11 am	4																								75	4	82	4	77	3	80	3
10/04/2021	2:52:31 am	4																								75	4	82	4	76	3	80	3
10/04/2021	2:52:51 am	4																								75	4	83	4	75	3	80	3
10/04/2021	2:53:11 am	4																								75	4	82	4	75	3	80	3
10/04/2021	2:53:31 am	4																								76	4	82	4	75	3	80	3
10/04/2021	2:53:51 am	4																								76	4	79	4	75	3	77	3
10/04/2021	2:54:11 am	4																								77	4	78	4	75	3	76	3
10/04/2021	2:54:31 am	4																								78	4	78	4	76	3	78	3
10/04/2021	2:54:51 am	4																								78	4	79	4	76	3	78	3
10/04/2021	2:55:11 am	4																								77	4	80	4	76	3	78	3
10/04/2021	2:55:31 am	4																								77	4	79	4	76	3	78	3
10/04/2021	2:55:51 am	4																								77	4	81	4	77	3	78	3
10/04/2021	2:56:11 am	4																								77	4	80	4	77	3	78	3
10/04/2021	2:56:31 am	4																								77	4	81	4	78	3	80	3
10/04/2021	2:56:51 am	4																								78	4	81	4	77	3	80	3
10/04/2021	2:57:11 am	4																								78	4	81	4	78	3	80	3
10/04/2021	2:57:31 am	4																								77	4	81	4	77	3	80	3
10/04/2021	2:57:51 am	4																								78	4	81	4	78	3	78	3
10/04/2021	2:58:11 am	4																								77	4	81	4	80	3	78	3
10/04/2021	2:58:31 am	4																								77	4	81	4	80	3	78	3
10/04/2021	2:58:51 am	4																								77	4	81	4	78	3	78	3
10/04/2021	2:59:11 am	4																								76	4	80	4	78	3	78	3
10/04/2021	2:59:31 am	4																								76	4	82	3	77	3	78	3
10/04/2021	2:59:51 am	4																								75	4	81	4	76	3	80	3
10/04/2021	3:00:11 am	4																								75	4	80	4	76	3	80	3
10/04/2021	3:00:31 am	4																								75	4	80	4	76	3	80	3
10/04/2021	3:00:51 am	4																								75	4	80	4	76	3	80	3
10/04/2021	3:01:11 am	4																								75	4	80	4	76	3	78	3
10/04/2021	3:01:31 am	4																								76	4	80	4	76	3	78	3
10/04/2021	3:01:51 am	4																								76	4	80	4	77	3	78	3
10/04/2021	3:02:11 am	4																								76	4	81	4	77	3	78	3
10/04/2021	3:02:31 am	4																								76	4	81	4	78	3	78	3
10/04/2021	3:02:51 am	4																								76	4	81	4	77	3	78	3
10/04/2021	3:03:11 am	4																								76	4	81	4	78	3	80	3
10/04/2021	3:03:31 am	4																								76	4	81	4	78	3	80	3
10/04/2021	3:03:51 am	4																								76	4	83	3	78	3	80	3
10/04/2021	3:04:11 am	4																								77	4	81	4	78	3	80	3
10/04/2021	3:04:31 am	4																								77	4	82	4	78	3	78	3
10/04/2021	3:04:51 am	4																								78	4	82	4	79	3	78	3
10/04/2021	3:05:11 am	4																								77	4	82	4	79	3	78	3
10/04/2021	3:05:31 am	4																								77	4	82	4	80	3	78	3
10/04/2021	3:05:51 am	4																								77	4	82	4	81	3	78	3
10/04/2021	3:06:11 am	4																								77	4	83	4	81	3	78	3
10/04/2021	3:06:31 am	4																								77	4	82	4	80	3	80	3
10/04/2021	3:06:51 am	4																								77	4	82	4	80	3	80	3
10/04/2021	3:07:11 am	4																								77	4	82	3	81	3	80	3
10/04/2021	3:07:31 am	4																								77	4	82	4	80	3	80	3
10/04/2021	3:07:51 am	4																								78	4	82	4	80	3	80	3
10/04/2021	3:08:11 am	4																								78	4	83	4	81	3	80	3
10/04/2021	3:08:31 am	4																								79	4	82	4	81	3	80	3
10/04/2021	3:08:51 am	4																								79	4	82	4	81	3	80	3
10/04/2021	3:09:11 am	4																								79	4	79	4	82	3	77	3
10/04/2021	3:09:31 am	4																								79	4	78	4	82	3	76	3
10/04/2021	3:09:51 am	4																								79	4	78	4	82	3	78	3
10/04/2021	3:10:11 am	4																								78	4	79	4	82	3	78	3
10/04/2021	3:10:31 am	4																								79	4	80	4	83	3	78	3
10/04/2021	3:10:51 am	4																								79	4	79	4	82	3	78	3
10/04/2021	3:11:11 am	4																								79	4	81	4	83	3	78	3
10/04/2021	3:11:31 am	4																								79	4	80	4	84	3	78	3
10/04/2021	3:11:51 am	4																								79	4	81	4	84	3	80	3
10/04/2021	3:12:11 am	4																								79	4	81	4	83	3	80	3
10/04/2021	3:12:31 am	4																								79	4	81	4	83	3	80	3
10/04/2021	3:12:51 am	4																								79	4	81	4	83	3	80	3
10/04/2021	3:13:11 am	4																								79	4	81	4	83	3	78	3
10/04/2021	3:13:31 am	4																								80	4	81	4	83	3	78	3
10/04/2021	3:13:51 am	4																								79	4	81	4	83	3	78	3
10/04/2021	3:14:11 am	4																								80	4	81	4	83	3	78	3
10/04/2021	3:14:31 am	4																								79	4	80	4	83	3	78	3
10/04/2021	3:14:51 am	4																								79	4	82	3	83	3	78	3
10/04/2021	3:15:11 am	4																								79	4	81	4	83	3	80	3
10/04/2021	3:15:31 am	4																								79	4	80	4	83	3	80	3
10/04/2021	3:15:51 am	4																								80	4	80	4	83	3	80	3
10/04/2021	3:16:11 am	4																								80	4	80	4	83	3	80	3
10/04/2021	3:16:31 am	4																								80	4	80	4	83	3	78	3
10/04/2021	3:16:51 am	4																								79	4	80	4	84	3	78	3
10/04/2021	3:17:11 am	4																								79	4	80	4	82	3	78	3
10/04/2021	3:17:31 am	4																								79	4	81	4	82	3	78	3
10/04/2021	3:17:51 am	4																								79	4	81	4	82	3	78	3
10/04/2021	3:18:11 am	4																								79	4	81	4	81	3	78	3
10/04/2021	3:18:31 am	4																								79	4	81	4	81	3	80	3
10/04/2021	3:18:51 am	4																								79	4	81	4	82	3	80	3
10/04/2021	3:19:11 am	4																								79	4	83	3	80	3	80	3
10/04/2021	3:19:31 am	4																								80	4	81	4	81	3	80	3
10/04/2021	3:19:51 am	4																								79	4	82	4	81	3	78	3
10/04/2021	3:20:11 am	4																								77	4	82	4	80	3	78	3
10/04/2021	3:20:31 am	4																								80	4	82	4	80	3	78	3
10/04/2021	3:20:51 am	4																								77	4	82	4	81	3	78	3
10/04/2021	3:21:11 am	4																								80	4	82	4	80	3	78	3
10/04/2021	3:21:31 am	4																								79	4	83	4	81	3	78	3
10/04/2021	3:21:51 am	4																								77	4	82	4	81	3	80	3
10/04/2021	3:22:11 am	4																								79	4	82	4	80	3	80	3
10/04/2021	3:22:31 am	4																								78	4	82	3	81	3	80	3
10/04/2021	3:22:51 am	4																								78	4	82	4	80	3	80	3
10/04/2021	3:23:11 am	4																								78	4	82	4	79	3	80	3
10/04/2021	3:23:31 am	4																								79	4	83	4	80	3	80	3
10/04/2021	3:23:51 am	4																								78	4	82	4	80	3	80	3
10/04/2021	3:24:11 am	4																								78	4	82	4	80	3	80	3
10/04/2021	3:24:31 am	4																								78	4	81	4	81	3	78	3
10/04/2021	3:24:51 am	4																								79	4	81	4	81	3	78	3
10/04/2021	3:25:11 am	4																								80	4	81	4	82	3	80	3
10/04/2021	3:25:31 am	4																								81	4	81	4	83	3	80	3
10/04/2021	3:25:51 am	4																								81	4	83	3	84	3	80	3
10/04/2021	3:26:11 am	4																								81	4	81	4	84	3	80	3
10/04/2021	3:26:31 am	4																								80	4	82	4	84	3	78	3
10/04/2021	3:26:51 am	4																								81	4	82	4	82	3	78	3
10/04/2021	3:27:11 am	4																								81	4	82	4	83	3	78	3
10/04/2021	3:27:31 am	4																								81	4	82	4	84	3	78	3
10/04/2021	3:27:51 am	4																								82	4	82	4	85	3	78	3
10/04/2021	3:28:11 am	4																								82	4	83	4	86	3	78	3
10/04/2021	3:28:31 am	4																								81	4	82	4	87	3	80	3
10/04/2021	3:28:51 am	4																								81	4	82	4	85	3	80	3
10/04/2021	3:29:11 am	4																								80	4	82	3	84	3	80	3
10/04/2021	3:29:31 am	4																								80	4	82	4	83	3	80	3
10/04/2021	3:29:51 am	4																								80	4	82	4	83	3	80	3
10/04/2021	3:30:11 am	4																								80	4	83	4	83	3	80	3
10/04/2021	3:30:31 am	4																								80	4	82	4	83	3	80	3
10/04/2021	3:30:51 am	4																								81	4	82	4	83	3	80	3
10/04/2021	3:31:11 am	4																								81	4	79	4	84	3	77	3
10/04/2021	3:31:31 am	4																								82	4	78	4	85	3	76	3
10/04/2021	3:31:51 am	4																								81	4	78	4	85	3	78	3
10/04/2021	3:32:11 am	4																								81	4	79	4	85	3	78	3
10/04/2021	3:32:31 am	4																								81	4	80	4	85	3	78	3
10/04/2021	3:32:51 am	4																								81	4	79	4	85	3	78	3
10/04/2021	3:33:11 am	4																								81	4	81	4	85	3	78	3
10/04/2021	3:33:31 am	4																								82	4	80	4	85	3	78	3
10/04/2021	3:33:51 am	4																								82	4	81	4	85	3	80	3
10/04/2021	3:34:11 am	4																								82	4	81	4	86	3	80	3
10/04/2021	3:34:31 am	4																								81	4	81	4	86	3	80	3
10/04/2021	3:34:51 am	4																								81	4	81	4	85	3	80	3
10/04/2021	3:35:11 am	4																								81	4	81	4	85	3	78	3
10/04/2021	3:35:31 am	4																								81	4	81	4	85	3	78	3
10/04/2021	3:35:51 am	4																								81	4	81	4	86	3	78	3
10/04/2021	3:36:11 am	4																								82	4	81	4	86	3	78	3
10/04/2021	3:36:31 am	4																								82	4	80	4	87	3	78	3
10/04/2021	3:36:51 am	4																								81	4	82	3	87	3	78	3
10/04/2021	3:37:11 am	4																								81	4	81	4	85	3	80	3
10/04/2021	3:37:31 am	4																								80	4	80	4	84	3	80	3
10/04/2021	3:37:51 am	4																								80	4	80	4	84	3	80	3
10/04/2021	3:38:11 am	4																								80	4	80	4	84	3	80	3
10/04/2021	3:38:31 am	4																								80	4	80	4	84	3	78	3
10/04/2021	3:38:51 am	4																								80	4	80	4	85	3	78	3
10/04/2021	3:39:11 am	4																								80	4	80	4	85	3	78	3
10/04/2021	3:39:31 am	4																								81	4	81	4	86	3	78	3
10/04/2021	3:39:51 am	4																								82	4	81	4	86	3	78	3
10/04/2021	3:40:11 am	4																								81	4	81	4	87	3	78	3
10/04/2021	3:40:31 am	4																								82	4	81	4	87	3	80	3
10/04/2021	3:40:51 am	4																								82	4	81	4	87	3	80	3
10/04/2021	3:41:11 am	4																								82	4	83	3	87	3	80	3
10/04/2021	3:41:31 am	4																								83	4	81	4	87	3	80	3
10/04/2021	3:41:51 am	4																								82	4	82	4	88	3	78	3
10/04/2021	3:42:11 am	4																								82	4	82	4	87	3	78	3
10/04/2021	3:42:31 am	4																								81	4	82	4	86	3	78	3
10/04/2021	3:42:51 am	4																								81	4	82	4	85	3	78	3
10/04/2021	3:43:11 am	4																								80	4	82	4	85	3	78	3
10/04/2021	3:43:31 am	4																								80	4	83	4	85	3	78	3
10/04/2021	3:43:51 am	4																								81	4	82	4	85	3	80	3
10/04/2021	3:44:11 am	4																								81	4	82	4	85	3	80	3
10/04/2021	3:44:31 am	4																								80	4	82	3	86	3	80	3
10/04/2021	3:44:51 am	4																								76	4	82	4	85	3	80	3
10/04/2021	3:45:11 am	4																								80	4	82	4	82	3	80	3
10/04/2021	3:45:31 am	4																								81	4	83	4	84	3	80	3
10/04/2021	3:45:51 am	4																								80	4	82	4	84	3	80	3
10/04/2021	3:46:11 am	4																								81	4	82	4	84	3	80	3
10/04/2021	3:46:31 am	4																								80	4	79	4	83	3	77	3
10/04/2021	3:46:51 am	4																								79	4	78	4	83	3	76	3
10/04/2021	3:47:11 am	4																								78	4	78	4	82	3	78	3
10/04/2021	3:47:31 am	4																								79	4	79	4	82	3	78	3
10/04/2021	3:47:51 am	4																								79	4	80	4	81	3	78	3
10/04/2021	3:48:11 am	4																								79	4	79	4	82	3	78	3
10/04/2021	3:48:31 am	4																								79	4	81	4	82	3	78	3
10/04/2021	3:48:51 am	4																								79	4	80	4	82	3	78	3
10/04/2021	3:49:11 am	4																								80	4	81	4	82	3	80	3
10/04/2021	3:49:31 am	4																								79	4	81	4	82	3	80	3
10/04/2021	3:49:51 am	4																								79	4	81	4	82	3	80	3
10/04/2021	3:50:11 am	4																								80	4	81	4	82	3	80	3
10/04/2021	3:50:31 am	4																								81	4	81	4	83	3	78	3
10/04/2021	3:50:51 am	4																								80	4	81	4	82	3	78	3
10/04/2021	3:51:11 am	4																								80	4	81	4	81	3	78	3
10/04/2021	3:51:31 am	4																								79	4	81	4	81	3	78	3
10/04/2021	3:51:51 am	4																								80	4	80	4	81	3	78	3
10/04/2021	3:52:11 am	4																								80	4	82	3	81	4	78	3
10/04/2021	3:52:31 am	4																								80	4	81	4	80	4	80	3
10/04/2021	3:52:51 am	4																								79	4	80	4	81	3	80	3
10/04/2021	3:53:11 am	4																								80	4	80	4	80	4	80	3
10/04/2021	3:53:31 am	4																								80	4	80	4	80	3	80	3
10/04/2021	3:53:51 am	4																								79	4	80	4	79	3	78	3
10/04/2021	3:54:11 am	4																								79	4	80	4	80	3	78	3
10/04/2021	3:54:31 am	4																								79	4	80	4	81	3	78	3
10/04/2021	3:54:51 am	4																								78	4	81	4	81	3	78	3
10/04/2021	3:55:11 am	4																								78	4	81	4	81	3	78	3
10/04/2021	3:55:31 am	4																								78	4	81	4	80	3	78	3
10/04/2021	3:55:51 am	4																								79	4	81	4	80	3	80	3
10/04/2021	3:56:11 am	4																								79	4	81	4	80	3	80	3
10/04/2021	3:56:31 am	4																								78	4	83	3	80	3	80	3
10/04/2021	3:56:51 am	4																								78	4	81	4	79	4	80	3
10/04/2021	3:57:11 am	4																								79	4	82	4	79	4	78	3
10/04/2021	3:57:31 am	4																								79	4	82	4	79	3	78	3
10/04/2021	3:57:51 am	4																								80	4	82	4	81	3	78	3
10/04/2021	3:58:11 am	4																								79	4	82	4	83	3	78	3
10/04/2021	3:58:31 am	4																								78	4	82	4	82	3	78	3
10/04/2021	3:58:51 am	4																								79	4	83	4	81	3	78	3
10/04/2021	3:59:11 am	4																								79	4	82	4	81	3	80	3
10/04/2021	3:59:31 am	4																								79	4	82	4	81	3	80	3
10/04/2021	3:59:51 am	4																								79	4	82	3	81	3	80	3
10/04/2021	4:00:11 am	4																								79	4	82	4	80	3	80	3
10/04/2021	4:00:31 am	4																								80	4	82	4	80	4	80	3
10/04/2021	4:00:51 am	4																								81	4	83	4	81	3	80	3
10/04/2021	4:01:11 am	4																								81	4	82	4	81	3	80	3
10/04/2021	4:01:31 am	4																								82	4	82	4	81	3	80	3
10/04/2021	4:01:51 am	4																								83	4	79	4	82	4	77	3
10/04/2021	4:02:11 am	4																								83	4	78	4	82	3	76	3
10/04/2021	4:02:31 am	4																								84	4	78	4	82	3	78	3
10/04/2021	4:02:51 am	4																								84	4	79	4	82	3	78	3
10/04/2021	4:03:11 am	4																								83	4	80	4	82	3	78	3
10/04/2021	4:03:31 am	4																								83	4	79	4	82	3	78	3
10/04/2021	4:03:51 am	4																								82	4	81	4	81	3	78	3
10/04/2021	4:04:11 am	4																								82	4	80	4	82	3	78	3
10/04/2021	4:04:31 am	4																								83	4	81	4	82	3	80	3
10/04/2021	4:04:51 am	4																								83	4	81	4	82	3	80	3
10/04/2021	4:05:11 am	4																								83	4	81	4	82	4	80	3
10/04/2021	4:05:31 am	4																								82	4	81	4	82	3	80	3
10/04/2021	4:05:51 am	4																								83	4	81	4	82	3	78	3
10/04/2021	4:06:11 am	4																								83	4	81	4	82	3	78	3
10/04/2021	4:06:31 am	4																								82	4	81	4	81	3	78	3
10/04/2021	4:06:51 am	4																								81	4	81	4	81	3	78	3
10/04/2021	4:07:11 am	4																								82	4	80	4	80	4	78	3
10/04/2021	4:07:31 am	4																								81	4	82	3	80	3	78	3
10/04/2021	4:07:51 am	4																								81	4	81	4	80	3	80	3
10/04/2021	4:08:11 am	4																								81	4	80	4	81	3	80	3
10/04/2021	4:08:31 am	4																								80	4	80	4	81	3	80	3
10/04/2021	4:08:51 am	4																								80	4	80	4	80	4	80	3
10/04/2021	4:09:11 am	4																								80	4	80	4	79	3	78	3
10/04/2021	4:09:31 am	4																								80	4	80	4	79	3	78	3
10/04/2021	4:09:51 am	4																								80	4	80	4	78	4	78	3
10/04/2021	4:10:11 am	4																								80	4	81	4	78	4	78	3
10/04/2021	4:10:31 am	4																								80	4	81	4	78	3	78	3
10/04/2021	4:10:51 am	4																								81	4	81	4	78	4	78	3
10/04/2021	4:11:11 am	4																								81	4	81	4	79	4	80	3
10/04/2021	4:11:31 am	4																								81	4	81	4	79	4	80	3
10/04/2021	4:11:51 am	4																								81	4	83	3	80	3	80	3
10/04/2021	4:12:11 am	4																								81	4	81	4	80	3	80	3
10/04/2021	4:12:31 am	4																								82	4	82	4	80	3	78	3
10/04/2021	4:12:51 am	4																								82	4	82	4	80	3	78	3
10/04/2021	4:13:11 am	4																								82	4	82	4	80	4	78	3
10/04/2021	4:13:31 am	4																								81	4	82	4	80	4	78	3

## Sheet: ID 2
Date	Time	Technology	CO	sCO	CI	sCI	SV	SVI	PR	SYSART	DIAART	MAP	SVR	SVRI	SVV	PRV	PPV	EDV	sEDV	EDVI	sEDVI	RVEF	sRVEF	ScvO₂/SvO₂	SQI	StO₂ A1	TPI A1	StO₂ A2	TPI A2	StO₂ B1	TPI B1	StO₂ B2	TPI B2
		1-F, 4-SG	L/min	L/min	L/min/m²	L/min/m²	mL/b	mL/b/m²	bpm	mmHg	mmHg	mmHg	dyne-s/cm⁵	dyne-s-m²/cm⁵	%		%	mL	mL	mL/m²	mL/m²	% EFU	% EFU	%		%		%		%		%
05.10.2021	07:51:10	4																									65535		65535		65535		65535
05.10.2021	07:51:30	4																									65535		65535		65535		65535
05.10.2021	07:51:50	4																									65535		65535		65535		65535
05.10.2021	07:52:10	4																									65535		65535		65535		65535
05.10.2021	07:52:30	4																									65535		65535		65535		65535
05.10.2021	07:52:50	4																									65535		65535		65535		65535
05.10.2021	07:53:10	4																									65535		65535		65535		65535
05.10.2021	07:53:30	4
05.10.2021	07:53:50	4
05.10.2021	07:54:10	4
05.10.2021	07:54:30	4
05.10.2021	07:54:50	4
05.10.2021	07:55:10	4
05.10.2021	07:55:30	4
05.10.2021	07:55:50	4
05.10.2021	07:56:10	4
05.10.2021	07:56:30	4
05.10.2021	07:56:50	4
05.10.2021	07:57:10	4
05.10.2021	07:57:30	4
05.10.2021	07:57:50	4
05.10.2021	07:58:10	4
05.10.2021	07:58:30	4
05.10.2021	07:58:50	4
05.10.2021	07:59:10	4
05.10.2021	07:59:30	4
05.10.2021	07:59:50	4
05.10.2021	08:00:10	4
05.10.2021	08:00:30	4
05.10.2021	08:00:50	4
05.10.2021	08:01:10	4
05.10.2021	08:01:30	4
05.10.2021	08:01:50	4
05.10.2021	08:02:10	4
05.10.2021	08:02:30	4
05.10.2021	08:02:50	4
05.10.2021	08:03:10	4
05.10.2021	08:03:30	4
05.10.2021	08:03:50	4
05.10.2021	08:04:10	4
05.10.2021	08:04:30	4
05.10.2021	08:04:50	4
05.10.2021	08:05:10	4
05.10.2021	08:05:30	4
05.10.2021	08:05:50	4
05.10.2021	08:06:10	4
05.10.2021	08:06:30	4
05.10.2021	08:06:50	4
05.10.2021	08:07:10	4
05.10.2021	08:07:30	4
05.10.2021	08:07:50	4
05.10.2021	08:08:10	4
05.10.2021	08:08:30	4
05.10.2021	08:08:50	4
05.10.2021	08:09:10	4
05.10.2021	08:09:30	4
05.10.2021	08:09:50	4
05.10.2021	08:10:10	4
05.10.2021	08:10:30	4
05.10.2021	08:10:50	4
05.10.2021	08:11:10	4
05.10.2021	08:11:30	4
05.10.2021	08:11:50	4
05.10.2021	08:12:10	4
05.10.2021	08:12:30	4
05.10.2021	08:12:50	4
05.10.2021	08:13:10	4
05.10.2021	08:13:30	4
05.10.2021	08:13:50	4
05.10.2021	08:14:10	4
05.10.2021	08:14:30	4
05.10.2021	08:14:50	4
05.10.2021	08:15:10	4
05.10.2021	08:15:30	4
05.10.2021	08:15:50	4
05.10.2021	08:16:10	4
05.10.2021	08:16:30	4
05.10.2021	08:16:50	4
05.10.2021	08:17:10	4
05.10.2021	08:17:30	4
05.10.2021	08:17:50	4
05.10.2021	08:18:10	4
05.10.2021	08:18:30	4
05.10.2021	08:18:50	4
05.10.2021	08:19:10	4
05.10.2021	08:19:30	4
05.10.2021	08:19:50	4
05.10.2021	08:20:10	4
05.10.2021	08:20:30	4
05.10.2021	08:20:50	4
05.10.2021	08:21:10	4
05.10.2021	08:21:30	4
05.10.2021	08:21:50	4
05.10.2021	08:22:10	4
05.10.2021	08:22:30	4
05.10.2021	08:22:50	4
05.10.2021	08:23:10	4
05.10.2021	08:23:30	4
05.10.2021	08:23:50	4
05.10.2021	08:24:10	4
05.10.2021	08:24:30	4
05.10.2021	08:24:50	4
05.10.2021	08:25:10	4
05.10.2021	08:25:30	4
05.10.2021	08:25:50	4
05.10.2021	08:26:10	4
05.10.2021	08:26:30	4
05.10.2021	08:26:50	4
05.10.2021	08:27:10	4
05.10.2021	08:27:30	4
05.10.2021	08:27:50	4
05.10.2021	08:28:10	4
05.10.2021	08:28:30	4
05.10.2021	08:28:50	4
05.10.2021	08:29:10	4
05.10.2021	08:29:30	4
05.10.2021	08:29:50	4
05.10.2021	08:30:10	4
05.10.2021	08:30:30	4
05.10.2021	08:30:50	4
05.10.2021	08:31:10	4
05.10.2021	08:31:30	4
05.10.2021	08:31:50	4
05.10.2021	08:32:10	4
05.10.2021	08:32:30	4
05.10.2021	08:32:50	4
05.10.2021	08:33:10	4
05.10.2021	08:33:30	4
05.10.2021	08:33:50	4
05.10.2021	08:34:10	4
05.10.2021	08:34:30	4
05.10.2021	08:34:50	4
05.10.2021	08:35:10	4
05.10.2021	08:35:30	4
05.10.2021	08:35:50	4
05.10.2021	08:36:10	4
05.10.2021	08:36:30	4
05.10.2021	08:36:50	4
05.10.2021	08:37:10	4
05.10.2021	08:37:30	4
05.10.2021	08:37:50	4
05.10.2021	08:38:10	4
05.10.2021	08:38:30	4
05.10.2021	08:38:50	4
05.10.2021	08:39:10	4
05.10.2021	08:39:30	4
05.10.2021	08:39:50	4
05.10.2021	08:40:10	4
05.10.2021	08:40:30	4
05.10.2021	08:40:50	4
05.10.2021	08:41:10	4
05.10.2021	08:41:30	4
05.10.2021	08:41:50	4
05.10.2021	08:42:10	4
05.10.2021	08:42:30	4
05.10.2021	08:42:50	4
05.10.2021	08:43:10	4
05.10.2021	08:43:30	4
05.10.2021	08:43:50	4
05.10.2021	08:44:10	4
05.10.2021	08:44:30	4
05.10.2021	08:44:50	4
05.10.2021	08:45:10	4
05.10.2021	08:45:30	4
05.10.2021	08:45:50	4
05.10.2021	08:46:10	4
05.10.2021	08:46:30	4
05.10.2021	08:46:50	4
05.10.2021	08:47:10	4
05.10.2021	08:47:30	4
05.10.2021	08:47:50	4
05.10.2021	08:48:10	4
05.10.2021	08:48:30	4
05.10.2021	08:48:50	4
05.10.2021	08:49:10	4
05.10.2021	08:49:30	4
05.10.2021	08:49:50	4
05.10.2021	08:50:10	4
05.10.2021	08:50:30	4
05.10.2021	08:50:50	4
05.10.2021	08:51:10	4
05.10.2021	08:51:30	4
05.10.2021	08:51:50	4
05.10.2021	08:52:10	4
05.10.2021	08:52:30	4
05.10.2021	08:52:50	4
05.10.2021	08:53:10	4
05.10.2021	08:53:30	4
05.10.2021	08:53:50	4
05.10.2021	08:54:10	4
05.10.2021	08:54:30	4
05.10.2021	08:54:50	4
05.10.2021	08:55:10	4
05.10.2021	08:55:30	4
05.10.2021	08:55:50	4
05.10.2021	08:56:10	4
05.10.2021	08:56:30	4
05.10.2021	08:56:50	4
05.10.2021	08:57:10	4
05.10.2021	08:57:30	4
05.10.2021	08:57:50	4
05.10.2021	08:58:10	4
05.10.2021	08:58:30	4
05.10.2021	08:58:50	4
05.10.2021	08:59:10	4																								70	4	70	4	79	4	68	4
05.10.2021	08:59:30	4																								70	4	70	4	77	2	68	4
05.10.2021	08:59:50	4																								70	4	70	4	77	2	68	4
05.10.2021	09:00:10	4																								70	4	70	4	74	3	64	4
05.10.2021	09:00:30	4																								70	4	71	4	74	2	62	4
05.10.2021	09:00:50	4																								70	4	71	4	76	1	62	4
05.10.2021	09:01:10	4																								70	4	70	4	74	2	62	4
05.10.2021	09:01:30	4																								70	4	70	4	74	2	64	4
05.10.2021	09:01:50	4																								71	4	70	4	73	2	64	4
05.10.2021	09:02:10	4																								70	4	70	4	73	2	64	4
05.10.2021	09:02:30	4																								72	4	71	4	78	3	70	4
05.10.2021	09:02:50	4																								70	4	71	4	80	3	70	4
05.10.2021	09:03:10	4																								70	4	70	4	77	4	68	4
05.10.2021	09:03:30	4																								73	4	70	4	77	4	66	4
05.10.2021	09:03:50	4																								73	4	70	4	78	4	68	4
05.10.2021	09:04:10	4																								72	4	69	4	77	4	68	4
05.10.2021	09:04:30	4																								71	4	68	4	76	4	68	4
05.10.2021	09:04:50	4																								70	4	67	4	74	4	68	4
05.10.2021	09:05:10	4																								70	4	68	4	75	4	68	4
05.10.2021	09:05:30	4																								71	4	69	4	74	4	68	4
05.10.2021	09:05:50	4																								70	4	69	4	70	4	68	4
05.10.2021	09:06:10	4																								73	4	71	4	72	4	68	4
05.10.2021	09:06:30	4																								73	4	73	4	73	4	68	4
05.10.2021	09:06:50	4																								75	4	76	3	75	4	68	4
05.10.2021	09:07:10	4																								76	4	77	4	76	4	68	4
05.10.2021	09:07:30	4																								77	4	79	3	79	3	72	4
05.10.2021	09:07:50	4																								79	4	77	4	78	3	72	4
05.10.2021	09:08:10	4																								78	4	81	3	80	3	72	4
05.10.2021	09:08:30	4																								79	4	81	3	83	3	72	4
05.10.2021	09:08:50	4																								80	4	81	4	82	3	72	4
05.10.2021	09:09:10	4																								80	4	80	4	81	3	72	4
05.10.2021	09:09:30	4																								80	4	82	3	83	3	72	4
05.10.2021	09:09:50	4																								81	4	81	3	84	3	72	4
05.10.2021	09:10:10	4																								80	4	83	3	83	3	72	4
05.10.2021	09:10:30	4																								82	4	82	3	85	3	72	4
05.10.2021	09:10:50	4																								81	4	82	4	85	3	72	4
05.10.2021	09:11:10	4																								81	4	82	3	84	3	72	4
05.10.2021	09:11:30	4																								81	4	83	3	83	3	72	4
05.10.2021	09:11:50	4																								82	4	83	3	84	3	72	4
05.10.2021	09:12:10	4																								81	4	82	3	85	2	72	4
05.10.2021	09:12:30	4																								81	4	81	3	84	3	72	4
05.10.2021	09:12:50	4																								81	4	83	3	84	3	72	4
05.10.2021	09:13:10	4																								81	4	82	3	82	2	72	4
05.10.2021	09:13:30	4																								81	4	83	3	82	3	72	4
05.10.2021	09:13:50	4																								82	4	82	3	83	4	72	4
05.10.2021	09:14:10	4																								80	4	77	4	80	4	70	4
05.10.2021	09:14:30	4																								78	4	78	3	76	4	66	4
05.10.2021	09:14:50	4																								74	4	75	4	72	4	63	4
05.10.2021	09:15:10	4																								74	4	76	3	73	4	63	4
05.10.2021	09:15:30	4																								72	4	75	4	71	4	63	4
05.10.2021	09:15:50	4																								73	4	73	4	71	4	63	4
05.10.2021	09:16:10	4																								73	4	74	4	72	4	63	4
05.10.2021	09:16:30	4																								70	4	71	4	73	4	63	3
05.10.2021	09:16:50	4																								70	4	71	4	74	4	63	2
05.10.2021	09:17:10	4																								70	4	70	4	73	4	64	3
05.10.2021	09:17:30	4																								69	4	69	4	73	4	64	4
05.10.2021	09:17:50	4																								68	4	68	4	73	4	64	3
05.10.2021	09:18:10	4																								66	4	65	4	73	4	63	3
05.10.2021	09:18:30	4																								64	4	65	4	70	4	63	3
05.10.2021	09:18:50	4																								63	4	65	4	68	4	64	3
05.10.2021	09:19:10	4																								64	4	66	4	68	4	61	3
05.10.2021	09:19:30	4																								63	4	65	4	67	4	62	3
05.10.2021	09:19:50	4																								63	4	64	4	66	4	62	3
05.10.2021	09:20:10	4																								63	4	65	4	66	4	63	3
05.10.2021	09:20:30	4																								63	4	65	4	66	4	63	3
05.10.2021	09:20:50	4																								63	4	66	4	66	4	63	3
05.10.2021	09:21:10	4																								63	4	66	4	66	4	61	4
05.10.2021	09:21:30	4																								63	4	65	4	65	4	63	3
05.10.2021	09:21:50	4																								62	4	66	4	65	4	64	3
05.10.2021	09:22:10	4																								64	4	67	4	66	4	64	2
05.10.2021	09:22:30	4																								63	4	68	4	66	4	65	3
05.10.2021	09:22:50	4																								63	4	69	4	66	4	66	3
05.10.2021	09:23:10	4																								64	4	70	4	66	4	65	3
05.10.2021	09:23:30	4																								66	4	70	4	68	4	64	3
05.10.2021	09:23:50	4																								67	4	70	4	70	4	65	3
05.10.2021	09:24:10	4																								66	4	69	4	69	4	67	3
05.10.2021	09:24:30	4																								66	4	70	4	68	4	67	3
05.10.2021	09:24:50	4																								67	4	70	4	68	4	67	3
05.10.2021	09:25:10	4																								67	4	71	4	68	4	67	3
05.10.2021	09:25:30	4																								67	4	71	4	69	4	66	3
05.10.2021	09:25:50	4																								67	4	71	4	70	4	64	4
05.10.2021	09:26:10	4																								68	4	71	4	70	4	63	4
05.10.2021	09:26:30	4																								68	4	71	4	71	4	65	3
05.10.2021	09:26:50	4																								68	4	71	4	71	4	65	3
05.10.2021	09:27:10	4																								69	4	71	4	71	4	64	3
05.10.2021	09:27:30	4																								69	4	72	4	71	4	64	3
05.10.2021	09:27:50	4																								70	4	70	4	79	4	68	4
05.10.2021	09:28:10	4																								70	4	70	4	77	2	68	4
05.10.2021	09:28:30	4																								70	4	70	4	77	2	68	4
05.10.2021	09:28:50	4																								70	4	70	4	74	3	64	4
05.10.2021	09:29:10	4																								70	4	71	4	74	2	62	4
05.10.2021	09:29:30	4																								70	4	71	4	76	1	62	4
05.10.2021	09:29:50	4																								70	4	70	4	74	2	62	4
05.10.2021	09:30:10	4																								70	4	70	4	74	2	64	4
05.10.2021	09:30:30	4																								71	4	70	4	73	2	64	4
05.10.2021	09:30:50	4																								70	4	70	4	73	2	64	4
05.10.2021	09:31:10	4																								72	4	71	4	78	3	70	4
05.10.2021	09:31:30	4																								70	4	71	4	80	3	70	4
05.10.2021	09:31:50	4																								70	4	70	4	77	4	68	4
05.10.2021	09:32:10	4																								73	4	70	4	77	4	66	4
05.10.2021	09:32:30	4																								73	4	70	4	78	4	68	4
05.10.2021	09:32:50	4																								72	4	69	4	77	4	68	4
05.10.2021	09:33:10	4																								71	4	68	4	76	4	68	4
05.10.2021	09:33:30	4																								70	4	67	4	74	4	68	4
05.10.2021	09:33:50	4																								70	4	68	4	75	4	68	4
05.10.2021	09:34:10	4																								71	4	69	4	74	4	68	4
05.10.2021	09:34:30	4																								70	4	69	4	70	4	68	4
05.10.2021	09:34:50	4																								73	4	71	4	72	4	68	4
05.10.2021	09:35:10	4																								73	4	73	4	73	4	68	4
05.10.2021	09:35:30	4																								75	4	76	3	75	4	68	4
05.10.2021	09:35:50	4																								76	4	77	4	76	4	68	4
05.10.2021	09:36:10	4																								77	4	79	3	79	3	72	4
05.10.2021	09:36:30	4																								79	4	77	4	78	3	72	4
05.10.2021	09:36:50	4																								78	4	81	3	80	3	72	4
05.10.2021	09:37:10	4																								79	4	81	3	83	3	72	4
05.10.2021	09:37:30	4																								80	4	81	4	82	3	72	4
05.10.2021	09:37:50	4																								80	4	80	4	81	3	72	4
05.10.2021	09:38:10	4																								80	4	82	3	83	3	72	4
05.10.2021	09:38:30	4																								81	4	81	3	84	3	72	4
05.10.2021	09:38:50	4																								80	4	83	3	83	3	72	4
05.10.2021	09:39:10	4																								82	4	82	3	85	3	72	4
05.10.2021	09:39:30	4																								81	4	82	4	85	3	72	4
05.10.2021	09:39:50	4																								81	4	82	3	84	3	72	4
05.10.2021	09:40:10	4																								81	4	83	3	83	3	72	4
05.10.2021	09:40:30	4																								82	4	83	3	84	3	72	4
05.10.2021	09:40:50	4																								81	4	82	3	85	2	72	4
05.10.2021	09:41:10	4																								81	4	81	3	84	3	72	4
05.10.2021	09:41:30	4																								81	4	83	3	84	3	72	4
05.10.2021	09:41:50	4																								81	4	82	3	82	2	72	4
05.10.2021	09:42:10	4																								81	4	83	3	82	3	72	4
05.10.2021	09:42:30	4																								82	4	82	3	83	4	72	4
05.10.2021	09:42:50	4																								80	4	77	4	80	4	70	4
05.10.2021	09:43:10	4																								78	4	78	3	76	4	66	4
05.10.2021	09:43:30	4																								74	4	75	4	72	4	63	4
05.10.2021	09:43:50	4																								74	4	76	3	73	4	63	4
05.10.2021	09:44:10	4																								72	4	75	4	71	4	63	4
05.10.2021	09:44:30	4																								73	4	73	4	71	4	63	4
05.10.2021	09:44:50	4																								73	4	74	4	72	4	63	4
05.10.2021	09:45:10	4																								70	4	71	4	73	4	63	3
05.10.2021	09:45:30	4																								70	4	71	4	74	4	63	2
05.10.2021	09:45:50	4																								70	4	70	4	73	4	64	3
05.10.2021	09:46:10	4																								69	4	69	4	73	4	64	4
05.10.2021	09:46:30	4																								68	4	68	4	73	4	64	3
05.10.2021	09:46:50	4																								66	4	65	4	73	4	63	3
05.10.2021	09:47:10	4																								64	4	65	4	70	4	63	3
05.10.2021	09:47:30	4																								63	4	65	4	68	4	64	3
05.10.2021	09:47:50	4																								64	4	66	4	68	4	61	3
05.10.2021	09:48:10	4																								63	4	65	4	67	4	62	3
05.10.2021	09:48:30	4																								63	4	64	4	66	4	62	3
05.10.2021	09:48:50	4																								63	4	65	4	66	4	63	3
05.10.2021	09:49:10	4																								63	4	65	4	66	4	63	3
05.10.2021	09:49:30	4																								63	4	66	4	66	4	63	3
05.10.2021	09:49:50	4																								63	4	66	4	66	4	61	4
05.10.2021	09:50:10	4																								63	4	65	4	65	4	63	3
05.10.2021	09:50:30	4																								62	4	66	4	65	4	64	3
05.10.2021	09:50:50	4																								64	4	67	4	66	4	64	2
05.10.2021	09:51:10	4																								63	4	68	4	66	4	65	3
05.10.2021	09:51:30	4																								63	4	69	4	66	4	66	3
05.10.2021	09:51:50	4																								64	4	70	4	66	4	65	3
05.10.2021	09:52:10	4																								66	4	70	4	68	4	64	3
05.10.2021	09:52:30	4																								67	4	70	4	70	4	65	3
05.10.2021	09:52:50	4																								66	4	69	4	69	4	67	3
05.10.2021	09:53:10	4																								66	4	70	4	68	4	67	3
05.10.2021	09:53:30	4																								67	4	70	4	68	4	67	3
05.10.2021	09:53:50	4																								67	4	71	4	68	4	67	3
05.10.2021	09:54:10	4																								67	4	71	4	69	4	66	3
05.10.2021	09:54:30	4																								67	4	71	4	70	4	64	4
05.10.2021	09:54:50	4																								68	4	71	4	70	4	63	4
05.10.2021	09:55:10	4																								68	4	71	4	71	4	65	3
05.10.2021	09:55:30	4																								68	4	71	4	71	4	65	3
05.10.2021	09:55:50	4																								69	4	71	4	71	4	64	3
05.10.2021	09:56:10	4																								69	4	72	4	71	4	64	3
05.10.2021	09:56:30	4																								70	4	70	4	79	4	68	4
05.10.2021	09:56:50	4																								70	4	70	4	77	2	68	4
05.10.2021	09:57:10	4																								70	4	70	4	77	2	68	4
05.10.2021	09:57:30	4																								70	4	70	4	74	3	64	4
05.10.2021	09:57:50	4																								70	4	71	4	74	2	62	4
05.10.2021	09:58:10	4																								70	4	71	4	76	1	62	4
05.10.2021	09:58:30	4																								70	4	70	4	74	2	62	4
05.10.2021	09:58:50	4																								70	4	70	4	74	2	64	4
05.10.2021	09:59:10	4																								71	4	70	4	73	2	64	4
05.10.2021	09:59:30	4																								70	4	70	4	73	2	64	4
05.10.2021	09:59:50	4																								72	4	71	4	78	3	70	4
05.10.2021	10:00:10	4																								70	4	71	4	80	3	70	4
05.10.2021	10:00:30	4																								70	4	70	4	77	4	68	4
05.10.2021	10:00:50	4																								73	4	70	4	77	4	66	4
05.10.2021	10:01:10	4																								73	4	70	4	78	4	68	4
05.10.2021	10:01:30	4																								72	4	69	4	77	4	68	4
05.10.2021	10:01:50	4																								71	4	68	4	76	4	68	4
05.10.2021	10:02:10	4																								70	4	67	4	74	4	68	4
05.10.2021	10:02:30	4																								70	4	68	4	75	4	68	4
05.10.2021	10:02:50	4																								71	4	69	4	74	4	68	4
05.10.2021	10:03:10	4																								70	4	69	4	70	4	68	4
05.10.2021	10:03:30	4																								73	4	71	4	72	4	68	4
05.10.2021	10:03:50	4																								73	4	73	4	73	4	68	4
05.10.2021	10:04:10	4																								75	4	76	3	75	4	68	4
05.10.2021	10:04:30	4																								76	4	77	4	76	4	68	4
05.10.2021	10:04:50	4																								77	4	79	3	79	3	72	4
05.10.2021	10:05:10	4																								79	4	77	4	78	3	72	4
05.10.2021	10:05:30	4																								78	4	81	3	80	3	72	4
05.10.2021	10:05:50	4																								79	4	81	3	83	3	72	4
05.10.2021	10:06:10	4																								80	4	81	4	82	3	72	4
05.10.2021	10:06:30	4																								80	4	80	4	81	3	72	4
05.10.2021	10:06:50	4																								80	4	82	3	83	3	72	4
05.10.2021	10:07:10	4																								81	4	81	3	84	3	72	4
05.10.2021	10:07:30	4																								80	4	83	3	83	3	72	4
05.10.2021	10:07:50	4																								82	4	82	3	85	3	72	4
05.10.2021	10:08:10	4																								81	4	82	4	85	3	72	4
05.10.2021	10:08:30	4																								81	4	82	3	84	3	72	4
05.10.2021	10:08:50	4																								81	4	83	3	83	3	72	4
05.10.2021	10:09:10	4																								82	4	83	3	84	3	72	4
05.10.2021	10:09:30	4																								81	4	82	3	85	2	72	4
05.10.2021	10:09:50	4																								81	4	81	3	84	3	72	4
05.10.2021	10:10:10	4																								81	4	83	3	84	3	72	4
05.10.2021	10:10:30	4																								81	4	82	3	82	2	72	4
05.10.2021	10:10:50	4																								81	4	83	3	82	3	72	4
05.10.2021	10:11:10	4																								82	4	82	3	83	4	72	4
05.10.2021	10:11:30	4																								80	4	77	4	80	4	70	4
05.10.2021	10:11:50	4																								78	4	78	3	76	4	66	4
05.10.2021	10:12:10	4																								74	4	75	4	72	4	63	4
05.10.2021	10:12:30	4																								74	4	76	3	73	4	63	4
05.10.2021	10:12:50	4																								72	4	75	4	71	4	63	4
05.10.2021	10:13:10	4																								73	4	73	4	71	4	63	4
05.10.2021	10:13:30	4																								73	4	74	4	72	4	63	4
05.10.2021	10:13:50	4																								70	4	71	4	73	4	63	3
05.10.2021	10:14:10	4																								70	4	71	4	74	4	63	2
05.10.2021	10:14:30	4																								70	4	70	4	73	4	64	3
05.10.2021	10:14:50	4																								69	4	69	4	73	4	64	4
05.10.2021	10:15:10	4																								68	4	68	4	73	4	64	3
05.10.2021	10:15:30	4																								66	4	65	4	73	4	63	3
05.10.2021	10:15:50	4																								64	4	65	4	70	4	63	3
05.10.2021	10:16:10	4																								63	4	65	4	68	4	64	3
05.10.2021	10:16:30	4																								64	4	66	4	68	4	61	3
05.10.2021	10:16:50	4																								63	4	65	4	67	4	62	3
05.10.2021	10:17:10	4																								63	4	64	4	66	4	62	3
05.10.2021	10:17:30	4																								63	4	65	4	66	4	63	3
05.10.2021	10:17:50	4																								63	4	65	4	66	4	63	3
05.10.2021	10:18:10	4																								63	4	66	4	66	4	63	3
05.10.2021	10:18:30	4																								63	4	66	4	66	4	61	4
05.10.2021	10:18:50	4																								63	4	65	4	65	4	63	3
05.10.2021	10:19:10	4																								62	4	66	4	65	4	64	3
05.10.2021	10:19:30	4																								64	4	67	4	66	4	64	2
05.10.2021	10:19:50	4																								63	4	68	4	66	4	65	3
05.10.2021	10:20:10	4																								63	4	69	4	66	4	66	3
05.10.2021	10:20:30	4																								64	4	70	4	66	4	65	3
05.10.2021	10:20:50	4																								66	4	70	4	68	4	64	3
05.10.2021	10:21:10	4																								67	4	70	4	70	4	65	3
05.10.2021	10:21:30	4																								66	4	69	4	69	4	67	3
05.10.2021	10:21:50	4																								66	4	70	4	68	4	67	3
05.10.2021	10:22:10	4																								67	4	70	4	68	4	67	3
05.10.2021	10:22:30	4																								67	4	71	4	68	4	67	3
05.10.2021	10:22:50	4																								67	4	71	4	69	4	66	3
05.10.2021	10:23:10	4																								67	4	71	4	70	4	64	4
05.10.2021	10:23:30	4																								68	4	71	4	70	4	63	4
05.10.2021	10:23:50	4																								68	4	71	4	71	4	65	3
05.10.2021	10:24:10	4																								68	4	71	4	71	4	65	3
05.10.2021	10:24:30	4																								69	4	71	4	71	4	64	3
05.10.2021	10:24:50	4																								69	4	72	4	71	4	64	3
05.10.2021	10:25:10	4																								63	4	66	4	66	4	63	3
05.10.2021	10:25:30	4																								63	4	66	4	66	4	61	4
05.10.2021	10:25:50	4																								63	4	65	4	65	4	63	3
05.10.2021	10:26:10	4																								62	4	66	4	65	4	64	3
05.10.2021	10:26:30	4																								64	4	67	4	66	4	64	2
05.10.2021	10:26:50	4																								63	4	68	4	66	4	65	3
05.10.2021	10:27:10	4																								63	4	69	4	66	4	66	3
05.10.2021	10:27:30	4																								64	4	70	4	66	4	65	3
05.10.2021	10:27:50	4																								66	4	70	4	68	4	64	3
05.10.2021	10:28:10	4																								67	4	70	4	70	4	65	3
05.10.2021	10:28:30	4																								66	4	69	4	69	4	67	3
05.10.2021	10:28:50	4																								66	4	70	4	68	4	67	3
05.10.2021	10:29:10	4																								67	4	70	4	68	4	67	3
05.10.2021	10:29:30	4																								67	4	71	4	68	4	67	3
05.10.2021	10:29:50	4																								67	4	71	4	69	4	66	3
05.10.2021	10:30:10	4																								67	4	71	4	70	4	64	4
05.10.2021	10:30:30	4																								68	4	71	4	70	4	63	4
05.10.2021	10:30:50	4																								68	4	71	4	71	4	65	3
05.10.2021	10:31:10	4																								68	4	71	4	71	4	65	3
05.10.2021	10:31:30	4																								69	4	71	4	71	4	64	3
05.10.2021	10:31:50	4																								69	4	72	4	71	4	64	3
05.10.2021	10:32:10	4																								70	4	70	4	79	4	68	4
05.10.2021	10:32:30	4																								70	4	70	4	77	2	68	4
05.10.2021	10:32:50	4																								70	4	70	4	77	2	68	4
05.10.2021	10:33:10	4																								70	4	70	4	74	3	64	4
05.10.2021	10:33:30	4																								70	4	71	4	74	2	62	4
05.10.2021	10:33:50	4																								70	4	71	4	76	1	62	4
05.10.2021	10:34:10	4																								70	4	70	4	74	2	62	4
05.10.2021	10:34:30	4																								70	4	70	4	74	2	64	4
05.10.2021	10:34:50	4																								71	4	70	4	73	2	64	4
05.10.2021	10:35:10	4																								70	4	70	4	73	2	64	4
05.10.2021	10:35:30	4																								72	4	71	4	78	3	70	4
05.10.2021	10:35:50	4																								70	4	71	4	80	3	70	4
05.10.2021	10:36:10	4																								70	4	70	4	77	4	68	4
05.10.2021	10:36:30	4																								73	4	70	4	77	4	66	4
05.10.2021	10:36:50	4																								73	4	70	4	78	4	68	4
05.10.2021	10:37:10	4																								72	4	69	4	77	4	68	4
05.10.2021	10:37:30	4																								71	4	68	4	76	4	68	4
05.10.2021	10:37:50	4																								70	4	67	4	74	4	68	4
05.10.2021	10:38:10	4																								70	4	68	4	75	4	68	4
05.10.2021	10:38:30	4																								71	4	69	4	74	4	68	4
05.10.2021	10:38:50	4																								70	4	69	4	70	4	68	4
05.10.2021	10:39:10	4																								73	4	71	4	72	4	68	4
05.10.2021	10:39:30	4																								73	4	73	4	73	4	68	4
05.10.2021	10:39:50	4																								75	4	76	3	75	4	68	4
05.10.2021	10:40:10	4																								76	4	77	4	76	4	68	4
05.10.2021	10:40:30	4																								77	4	79	3	79	3	72	4
05.10.2021	10:40:50	4																								79	4	77	4	78	3	72	4
05.10.2021	10:41:10	4																								78	4	81	3	80	3	72	4
05.10.2021	10:41:30	4																								79	4	81	3	83	3	72	4
05.10.2021	10:41:50	4																								80	4	81	4	82	3	72	4
05.10.2021	10:42:10	4																								80	4	80	4	81	3	72	4
05.10.2021	10:42:30	4																								80	4	82	3	83	3	72	4
05.10.2021	10:42:50	4																								81	4	81	3	84	3	72	4
05.10.2021	10:43:10	4																								80	4	83	3	83	3	72	4
05.10.2021	10:43:30	4																								82	4	82	3	85	3	72	4
05.10.2021	10:43:50	4																								81	4	82	4	85	3	72	4
05.10.2021	10:44:10	4																								81	4	82	3	84	3	72	4
05.10.2021	10:44:30	4																								81	4	83	3	83	3	72	4
05.10.2021	10:44:50	4																								82	4	83	3	84	3	72	4
05.10.2021	10:45:10	4																								81	4	82	3	85	2	72	4
05.10.2021	10:45:30	4																								81	4	81	3	84	3	72	4
05.10.2021	10:45:50	4																								81	4	83	3	84	3	72	4
05.10.2021	10:46:10	4																								81	4	82	3	82	2	72	4
05.10.2021	10:46:30	4																								81	4	83	3	82	3	72	4
05.10.2021	10:46:50	4																								82	4	82	3	83	4	72	4
05.10.2021	10:47:10	4																								80	4	77	4	80	4	70	4
05.10.2021	10:47:30	4																								78	4	78	3	76	4	66	4
05.10.2021	10:47:50	4																								74	4	75	4	72	4	63	4
05.10.2021	10:48:10	4																								74	4	76	3	73	4	63	4
05.10.2021	10:48:30	4																								72	4	75	4	71	4	63	4
05.10.2021	10:48:50	4																								73	4	73	4	71	4	63	4
05.10.2021	10:49:10	4																								73	4	74	4	72	4	63	4
05.10.2021	10:49:30	4																								70	4	71	4	73	4	63	3
05.10.2021	10:49:50	4																								70	4	71	4	74	4	63	2
05.10.2021	10:50:10	4																								70	4	70	4	73	4	64	3
05.10.2021	10:50:30	4																								69	4	69	4	73	4	64	4
05.10.2021	10:50:50	4																								68	4	68	4	73	4	64	3
05.10.2021	10:51:10	4																								66	4	65	4	73	4	63	3
05.10.2021	10:51:30	4																								64	4	65	4	70	4	63	3
05.10.2021	10:51:50	4																								63	4	65	4	68	4	64	3
05.10.2021	10:52:10	4																								64	4	66	4	68	4	61	3
05.10.2021	10:52:30	4																								63	4	65	4	67	4	62	3
05.10.2021	10:52:50	4																								63	4	64	4	66	4	62	3
05.10.2021	10:53:10	4																								63	4	65	4	66	4	63	3
05.10.2021	10:53:30	4																								63	4	65	4	66	4	63	3
05.10.2021	10:53:50	4																								63	4	66	4	66	4	63	3
05.10.2021	10:54:10	4																								63	4	66	4	66	4	61	4
05.10.2021	10:54:30	4																								63	4	65	4	65	4	63	3
05.10.2021	10:54:50	4																								62	4	66	4	65	4	64	3
05.10.2021	10:55:10	4																								64	4	67	4	66	4	64	2
05.10.2021	10:55:30	4																								63	4	68	4	66	4	65	3
05.10.2021	10:55:50	4																								63	4	69	4	66	4	66	3
05.10.2021	10:56:10	4																								64	4	70	4	66	4	65	3
05.10.2021	10:56:30	4																								66	4	70	4	68	4	64	3
05.10.2021	10:56:50	4																								67	4	70	4	70	4	65	3
05.10.2021	10:57:10	4																								66	4	69	4	69	4	67	3
05.10.2021	10:57:30	4																								66	4	70	4	68	4	67	3
05.10.2021	10:57:50	4																								67	4	70	4	68	4	67	3
05.10.2021	10:58:10	4																								67	4	71	4	68	4	67	3
05.10.2021	10:58:30	4																								67	4	71	4	69	4	66	3
05.10.2021	10:58:50	4																								67	4	71	4	70	4	64	4
05.10.2021	10:59:10	4																								68	4	71	4	70	4	63	4
05.10.2021	10:59:30	4																								68	4	71	4	71	4	65	3
05.10.2021	10:59:50	4																								68	4	71	4	71	4	65	3
05.10.2021	11:00:10	4																								69	4	71	4	71	4	64	3
05.10.2021	11:00:30	4																								69	4	72	4	71	4	64	3
05.10.2021	11:00:50	4																								70	4	72	4	70	4	64	4
05.10.2021	11:01:10	4																								70	4	72	4	70	4	63	4
05.10.2021	11:01:30	4																								70	4	72	4	70	4	65	3
05.10.2021	11:01:50	4																								71	4	72	4	69	4	65	3
05.10.2021	11:02:10	4																								70	4	72	4	69	4	64	3
05.10.2021	11:02:30	4																								71	4	71	4	69	4	64	3
05.10.2021	11:02:50	4																								71	4	72	4	69	4	64	4
05.10.2021	11:03:10	4																								71	4	72	4	69	4	63	4
05.10.2021	11:03:30	4																								71	4	72	4	69	4	65	3
05.10.2021	11:03:50	4																								72	4	72	4	70	4	65	3
05.10.2021	11:04:10	4																								71	4	72	4	70	4	64	3
05.10.2021	11:04:30	4																								72	4	73	4	70	4	64	3
05.10.2021	11:04:50	4																								72	4	72	4	70	4	64	4
05.10.2021	11:05:10	4																								72	4	73	4	70	4	63	4
05.10.2021	11:05:30	4																								73	4	73	4	70	4	65	3
05.10.2021	11:05:50	4																								72	4	73	4	70	4	65	3
05.10.2021	11:06:10	4																								73	4	73	4	70	4	64	3
05.10.2021	11:06:30	4																								73	4	73	4	70	4	64	3
05.10.2021	11:06:50	4																								73	4	73	4	70	4	66	3
05.10.2021	11:07:10	4																								73	4	73	4	71	4	66	3
05.10.2021	11:07:30	4																								73	4	73	4	71	4	66	3
05.10.2021	11:07:50	4																								73	4	73	4	71	4	68	3
05.10.2021	11:08:10	4																								73	4	74	4	71	4	68	3
05.10.2021	11:08:30	4																								73	4	74	4	65	1	68	3
05.10.2021	11:08:50	4																								74	4	74	4	68	4	66	3
05.10.2021	11:09:10	4																								73	4	74	4	68	4	64	3
05.10.2021	11:09:30	4																								74	4	74	4	70	4	66	3
05.10.2021	11:09:50	4																								74	4	74	4	71	4	66	3
05.10.2021	11:10:10	4																								74	4	74	4	71	0	66	3
05.10.2021	11:10:30	4																								74	4	75	4	75	4	68	3
05.10.2021	11:10:50	4																								74	4	75	4	73	4	68	3
05.10.2021	11:11:10	4																								74	4	74	4	74	4	68	3
05.10.2021	11:11:30	4																								74	4	75	4	74	4	66	3
05.10.2021	11:11:50	4																								75	4	75	4	71	1	64	3
05.10.2021	11:12:10	4																								74	4	75	4	70	1	66	3
05.10.2021	11:12:30	4																								75	4	75	4	74	4	66	3
05.10.2021	11:12:50	4																								75	4	75	4	86	4	66	3
05.10.2021	11:13:10	4																								74	4	75	4	72	0	68	3
05.10.2021	11:13:30	4																								75	4	75	4	74	4	68	3
05.10.2021	11:13:50	4																								75	4	75	4	74	0	68	3
05.10.2021	11:14:10	4																								74	4	74	4	72	4	68	3
05.10.2021	11:14:30	4																								75	4	75	4	72	0	68	3
05.10.2021	11:14:50	4																								75	4	76	4	72	0	68	3
05.10.2021	11:15:10	4																								75	4	75	4	72	4	68	3
05.10.2021	11:15:30	4																								75	4	75	4	72	0	68	3
05.10.2021	11:15:50	4																								76	4	77	4	72	0	68	3
05.10.2021	11:16:10	4																								75	4	76	4	71	4	70	3
05.10.2021	11:16:30	4																								76	4	76	4	73	4	70	3
05.10.2021	11:16:50	4																								76	4	75	4	74	4	72	3
05.10.2021	11:17:10	4																								76	4	76	4	74	4	72	3
05.10.2021	11:17:30	4																								76	4	75	4	74	4	72	3
05.10.2021	11:17:50	4																								75	4	76	4	74	4	72	3
05.10.2021	11:18:10	4																								76	4	75	4	74	4	72	3
05.10.2021	11:18:30	4																								76	4	76	4	73	4	71	3
05.10.2021	11:18:50	4																								75	4	75	4	73	4	71	3
05.10.2021	11:19:10	4																								75	4	76	4	73	4	71	3
05.10.2021	11:19:30	4																								75	4	76	4	74	4	68	3
05.10.2021	11:19:50	4																								76	4	75	4	74	4	70	3
05.10.2021	11:20:10	4																								75	4	76	4	74	4	70	3
05.10.2021	11:20:30	4																								75	4	76	4	74	4	72	3
05.10.2021	11:20:50	4																								75	4	75	4	74	4	72	3
05.10.2021	11:21:10	4																								76	4	76	4	74	4	72	3
05.10.2021	11:21:30	4																								75	4	75	4	74	4	72	3
05.10.2021	11:21:50	4																								75	4	75	4	74	4	72	3
05.10.2021	11:22:10	4																								75	4	75	4	73	4	71	3
05.10.2021	11:22:30	4																								75	4	75	4	73	4	71	3
05.10.2021	11:22:50	4																								75	4	75	4	73	4	71	3
05.10.2021	11:23:10	4																								74	4	74	4	72	4	68	3
05.10.2021	11:23:30	4																								73	4	74	4	72	4	70	3
05.10.2021	11:23:50	4																								73	4	73	4	72	4	70	3
05.10.2021	11:24:10	4																								73	4	73	4	72	4	72	3
05.10.2021	11:24:30	4																								73	4	73	4	73	4	72	3
05.10.2021	11:24:50	4																								72	4	73	4	72	4	72	3
05.10.2021	11:25:10	4																								72	4	73	4	72	4	72	3
05.10.2021	11:25:30	4																								72	4	72	4	72	4	72	3
05.10.2021	11:25:50	4																								72	4	73	4	73	4	71	3
05.10.2021	11:26:10	4																								72	4	73	4	73	4	71	3
05.10.2021	11:26:30	4																								72	4	73	4	72	4	71	3
05.10.2021	11:26:50	4																								72	4	73	4	73	4	72	3
05.10.2021	11:27:10	4																								72	4	73	4	73	4	72	3
05.10.2021	11:27:30	4																								72	4	73	4	73	4	72	3
05.10.2021	11:27:50	4																								73	4	73	4	73	4	72	3
05.10.2021	11:28:10	4																								72	4	73	4	73	4	72	3
05.10.2021	11:28:30	4																								73	4	73	4	73	4	71	3
05.10.2021	11:28:50	4																								73	4	73	4	73	4	71	3
05.10.2021	11:29:10	4																								73	4	73	4	73	4	71	3
05.10.2021	11:29:30	4																								73	4	74	4	73	4	68	3
05.10.2021	11:29:50	4																								73	4	73	4	73	4	70	3
05.10.2021	11:30:10	4																								73	4	73	4	73	4	70	3
05.10.2021	11:30:30	4																								73	4	73	4	73	4	72	3
05.10.2021	11:30:50	4																								73	4	73	4	73	4	72	3
05.10.2021	11:31:10	4																								73	4	73	4	73	4	72	3
05.10.2021	11:31:30	4																								73	4	73	4	73	4	72	3
05.10.2021	11:31:50	4																								73	4	74	4	73	4	72	3
05.10.2021	11:32:10	4																								73	4	74	4	73	4	71	3
05.10.2021	11:32:30	4																								73	4	74	4	73	4	71	3
05.10.2021	11:32:50	4																								74	4	74	4	73	4	71	3
05.10.2021	11:33:10	4																								73	4	74	4	73	4	72	3
05.10.2021	11:33:30	4																								73	4	74	4	73	4	72	3
05.10.2021	11:33:50	4																								74	4	75	4	73	4	72	3
05.10.2021	11:34:10	4																								74	4	75	4	73	4	72	3
05.10.2021	11:34:30	4																								74	4	74	4	74	4	72	3
05.10.2021	11:34:50	4																								74	4	75	4	73	4	71	3
05.10.2021	11:35:10	4																								74	4	75	4	73	4	71	3
05.10.2021	11:35:30	4																								74	4	75	4	74	4	71	3
05.10.2021	11:35:50	4																								74	4	75	4	74	4	68	3
05.10.2021	11:36:10	4																								74	4	76	4	75	4	70	3
05.10.2021	11:36:30	4																								75	4	76	4	75	4	70	3
05.10.2021	11:36:50	4																								75	4	76	4	75	4	72	3
05.10.2021	11:37:10	4																								76	4	76	4	75	4	72	3
05.10.2021	11:37:30	4																								75	4	77	4	76	4	72	3
05.10.2021	11:37:50	4																								76	4	77	4	76	4	72	3
05.10.2021	11:38:10	4																								76	4	77	4	77	4	72	3
05.10.2021	11:38:30	4																								76	4	77	4	76	4	71	3
05.10.2021	11:38:50	4																								76	4	77	4	76	4	71	3
05.10.2021	11:39:10	4																								76	4	77	4	77	4	71	3
05.10.2021	11:39:30	4																								76	4	77	4	77	4	74	3
05.10.2021	11:39:50	4																								76	4	77	4	77	4	74	3
05.10.2021	11:40:10	4																								76	4	77	4	77	4	74	3
05.10.2021	11:40:30	4																								77	4	77	4	77	4	73	3
05.10.2021	11:40:50	4																								76	4	77	4	77	4	73	3
05.10.2021	11:41:10	4																								76	4	77	4	77	4	73	3
05.10.2021	11:41:30	4																								77	4	78	4	78	4	75	3
05.10.2021	11:41:50	4																								77	4	77	4	77	4	76	3
05.10.2021	11:42:10	4																								77	4	77	4	77	4	75	3
05.10.2021	11:42:30	4																								76	4	77	4	78	4	74	3
05.10.2021	11:42:50	4																								77	4	77	4	78	4	74	3
05.10.2021	11:43:10	4																								77	4	78	4	78	4	74	3
05.10.2021	11:43:30	4																								78	4	78	4	78	4	74	3
05.10.2021	11:43:50	4																								78	4	78	4	78	4	74	3
05.10.2021	11:44:10	4																								78	4	79	4	78	4	73	3
05.10.2021	11:44:30	4																								78	4	79	4	79	4	73	3
05.10.2021	11:44:50	4																								78	4	79	4	79	4	73	3
05.10.2021	11:45:10	4																								78	4	79	4	79	4	75	3
05.10.2021	11:45:30	4																								78	4	79	4	79	4	76	3
05.10.2021	11:45:50	4																								78	4	79	4	79	4	75	3
05.10.2021	11:46:10	4																								78	4	79	4	79	4	74	3
05.10.2021	11:46:30	4																								78	4	79	4	79	4	74	3
05.10.2021	11:46:50	4																								78	4	79	4	79	4	76	3
05.10.2021	11:47:10	4																								79	4	79	4	79	4	76	3
05.10.2021	11:47:30	4																								78	4	79	4	79	4	76	3
05.10.2021	11:47:50	4																								79	4	80	4	79	4	77	3
05.10.2021	11:48:10	4																								79	4	79	4	79	4	77	3
05.10.2021	11:48:30	4																								80	4	80	4	80	4	77	3
05.10.2021	11:48:50	4																								80	4	79	4	79	4	77	3
05.10.2021	11:49:10	4																								79	4	80	4	79	4	77	3
05.10.2021	11:49:30	4																								79	4	80	4	79	4	77	3
05.10.2021	11:49:50	4																								79	4	80	4	79	4	76	3
05.10.2021	11:50:10	4																								79	4	80	4	79	4	76	3
05.10.2021	11:50:30	4																								79	4	80	4	79	4	76	3
05.10.2021	11:50:50	4																								79	4	80	4	79	4	76	3
05.10.2021	11:51:10	4																								80	4	80	4	80	4	77	3
05.10.2021	11:51:30	4																								79	4	80	4	79	4	77	3
05.10.2021	11:51:50	4																								80	4	80	4	80	4	77	3
05.10.2021	11:52:10	4																								80	4	81	4	80	4	77	3
05.10.2021	11:52:30	4																								80	4	81	4	80	4	76	3
05.10.2021	11:52:50	4																								80	4	81	4	80	4	76	3
05.10.2021	11:53:10	4																								80	4	81	4	80	4	76	3
05.10.2021	11:53:30	4																								81	4	81	4	80	4	77	3
05.10.2021	11:53:50	4																								81	4	82	4	80	4	77	3
05.10.2021	11:54:10	4																								80	4	81	4	80	4	77	3
05.10.2021	11:54:30	4																								81	4	81	4	80	4	77	3
05.10.2021	11:54:50	4																								81	4	82	4	80	4	77	3
05.10.2021	11:55:10	4																								81	4	82	4	80	4	77	3
05.10.2021	11:55:30	4																								81	4	82	4	80	4	76	3
05.10.2021	11:55:50	4																								80	4	82	4	79	4	76	3
05.10.2021	11:56:10	4																								80	4	81	4	78	4	76	3
05.10.2021	11:56:30	4																								79	4	81	4	79	3	76	3
05.10.2021	11:56:50	4																								78	4	80	4	85	2	77	3
05.10.2021	11:57:10	4																								79	4	83	4	88	1	77	3
05.10.2021	11:57:30	4																								76	4	77	4	81	2	77	3
05.10.2021	11:57:50	4																								72	4	73	4	79	3	77	3
05.10.2021	11:58:10	4																								70	4	72	4	75	3	76	3
05.10.2021	11:58:30	4																								70	4	72	4	73	4	76	3
05.10.2021	11:58:50	4																								69	4	72	4	73	3	76	3
05.10.2021	11:59:10	4																								69	4	72	4	72	3	77	3
05.10.2021	11:59:30	4																								69	4	72	4	72	4	77	3
05.10.2021	11:59:50	4																								69	4	72	4	72	3	77	3
05.10.2021	12:00:10	4																								69	4	72	4	72	4	77	3
05.10.2021	12:00:30	4																								69	4	73	4	73	3	77	3
05.10.2021	12:00:50	4																								69	4	73	4	74	3	77	3
05.10.2021	12:01:10	4																								70	4	74	4	74	3	76	3
05.10.2021	12:01:30	4																								70	4	75	4	75	3	76	3
05.10.2021	12:01:50	4																								71	4	75	4	75	3	76	3
05.10.2021	12:02:10	4																								71	4	75	4	76	3	76	3
05.10.2021	12:02:30	4																								72	4	76	4	76	3	77	3
05.10.2021	12:02:50	4																								72	4	75	4	76	3	77	3
05.10.2021	12:03:10	4																								72	4	76	4	76	3	77	3
05.10.2021	12:03:30	4																								73	4	76	4	75	3	77	3
05.10.2021	12:03:50	4																								73	4	76	4	76	3	76	3
05.10.2021	12:04:10	4																								73	4	77	4	76	3	76	3
05.10.2021	12:04:30	4																								73	4	77	4	76	3	76	3
05.10.2021	12:04:50	4																								73	4	77	4	76	3	77	3
05.10.2021	12:05:10	4																								73	4	77	4	77	3	77	3
05.10.2021	12:05:30	4																								74	4	78	4	76	3	77	3
05.10.2021	12:05:50	4																								74	4	78	4	77	3	77	3
05.10.2021	12:06:10	4																								74	4	78	4	77	3	77	3
05.10.2021	12:06:30	4																								74	4	78	4	76	3	77	3
05.10.2021	12:06:50	4																								74	4	78	4	75	3	76	3
05.10.2021	12:07:10	4																								74	4	77	4	74	3	76	3
05.10.2021	12:07:30	4																								74	4	77	4	74	3	76	3
05.10.2021	12:07:50	4																								73	4	77	4	73	3	76	3
05.10.2021	12:08:10	4																								73	4	76	4	74	4	77	3
05.10.2021	12:08:30	4																								73	4	76	4	75	3	77	3
05.10.2021	12:08:50	4																								72	4	76	4	74	3	77	3
05.10.2021	12:09:10	4																								72	4	75	4	76	3	77	3
05.10.2021	12:09:30	4																								72	4	75	4	77	3	77	3
05.10.2021	12:09:50	4																								72	4	75	4	76	3	77	3
05.10.2021	12:10:10	4																								72	4	75	4	76	3	77	3
05.10.2021	12:10:30	4																								72	4	75	4	76	3	77	3
05.10.2021	12:10:50	4																								72	4	76	4	76	3	77	3
05.10.2021	12:11:10	4																								72	4	76	4	76	3	77	3
05.10.2021	12:11:30	4																								76	2	78	4	77	1	76	3
05.10.2021	12:11:50	4																								72	4	75	4	78	3	76	3
05.10.2021	12:12:10	4																								73	4	75	4	77	3	76	3
05.10.2021	12:12:30	4																								73	4	75	4	79	3	76	3
05.10.2021	12:12:50	4																								73	4	74	4	77	3	77	3
05.10.2021	12:13:10	4																								72	4	73	4	76	3	77	3
05.10.2021	12:13:30	4																								70	4	71	4	75	3	77	3
05.10.2021	12:13:50	4																								70	4	70	4	74	3	77	3
05.10.2021	12:14:10	4																								69	4	70	4	74	3	76	3
05.10.2021	12:14:30	4																								67	4	68	4	73	3	76	3
05.10.2021	12:14:50	4																								67	4	69	4	75	3	76	3
05.10.2021	12:15:10	4																								68	4	69	4	75	3	77	3
05.10.2021	12:15:30	4																								68	4	70	4	75	3	77	3
05.10.2021	12:15:50	4																								69	4	70	4	76	3	77	3
05.10.2021	12:16:10	4																								69	4	70	4	74	3	77	3
05.10.2021	12:16:30	4																								68	4	70	4	75	3	77	3
05.10.2021	12:16:50	4																								69	4	70	4	74	3	77	3
05.10.2021	12:17:10	4																								69	4	70	4	74	3	76	3
05.10.2021	12:17:30	4																								69	4	70	4	73	3	76	3
05.10.2021	12:17:50	4																								69	4	70	4	73	3	76	3
05.10.2021	12:18:10	4																								69	4	71	4	72	3	76	3
05.10.2021	12:18:30	4																								69	4	71	4	71	3	72	3
05.10.2021	12:18:50	4																								68	4	71	4	70	3	72	3
05.10.2021	12:19:10	4																								67	4	70	4	68	3	72	3
05.10.2021	12:19:30	4																								67	4	70	4	68	4	71	3
05.10.2021	12:19:50	4																								68	4	70	4	67	3	71	3
05.10.2021	12:20:10	4																								68	4	70	4	67	4	71	3
05.10.2021	12:20:30	4																								68	4	70	4	68	4	74	3
05.10.2021	12:20:50	4																								68	4	70	4	68	3	74	3
05.10.2021	12:21:10	4																								69	4	71	4	69	3	74	3
05.10.2021	12:21:30	4																								69	4	71	4	69	4	73	3
05.10.2021	12:21:50	4																								70	4	72	4	71	3	73	3
05.10.2021	12:22:10	4																								70	4	71	4	71	3	73	3
05.10.2021	12:22:30	4																								70	4	72	4	72	3	75	3
05.10.2021	12:22:50	4																								71	4	72	4	72	3	76	3
05.10.2021	12:23:10	4																								71	4	72	4	72	3	75	3
05.10.2021	12:23:30	4																								71	4	72	4	73	3	74	3
05.10.2021	12:23:50	4																								72	4	73	4	73	3	74	3
05.10.2021	12:24:10	4																								73	4	74	4	74	3	74	3
05.10.2021	12:24:30	4																								73	4	74	4	75	3	74	3
05.10.2021	12:24:50	4																								73	4	74	4	76	3	74	3
05.10.2021	12:25:10	4																								73	4	74	4	76	3	73	3
05.10.2021	12:25:30	4																								73	4	75	4	76	3	73	3
05.10.2021	12:25:50	4																								74	4	75	4	77	3	73	3
05.10.2021	12:26:10	4																								75	4	76	4	76	3	75	3
05.10.2021	12:26:30	4																								75	4	76	4	77	3	76	3
05.10.2021	12:26:50	4																								76	4	77	4	78	3	77	3
05.10.2021	12:27:10	4																								77	4	78	4	79	3	74	3
05.10.2021	12:27:30	4																								77	4	78	4	80	3	78	3
05.10.2021	12:27:50	4																								76	4	77	4	79	3	74	3
05.10.2021	12:28:10	4																								76	4	78	4	79	3	74	3
05.10.2021	12:28:30	4																								77	4	78	4	79	3	76	3
05.10.2021	12:28:50	4																								77	4	78	4	79	3	76	3
05.10.2021	12:29:10	4																								77	4	78	4	78	3	76	3
05.10.2021	12:29:30	4																								77	4	79	4	79	3	75	3
05.10.2021	12:29:50	4																								78	4	78	4	79	3	76	3
05.10.2021	12:30:10	4																								77	4	79	4	79	3	77	3
05.10.2021	12:30:30	4																								78	4	78	4	80	3	76	3
05.10.2021	12:30:50	4																								77	4	78	4	78	3	78	3
05.10.2021	12:31:10	4																								78	4	79	4	80	3	78	3
05.10.2021	12:31:30	4																								78	4	80	4	80	3	78	3
05.10.2021	12:31:50	4																								79	4	79	4	79	3	78	3
05.10.2021	12:32:10	4																								78	4	81	4	81	3	78	3
05.10.2021	12:32:30	4																								80	4	80	4	80	3	78	3
05.10.2021	12:32:50	4																								79	4	81	4	81	3	80	3
05.10.2021	12:33:10	4																								80	4	81	4	82	3	80	3
05.10.2021	12:33:30	4																								80	4	81	4	83	3	80	3
05.10.2021	12:33:50	4																								80	4	81	4	83	3	80	3
05.10.2021	12:34:10	4																								80	4	81	4	83	3	78	3
05.10.2021	12:34:30	4																								80	4	81	4	82	3	78	3
05.10.2021	12:34:50	4																								78	4	81	4	84	3	78	3
05.10.2021	12:35:10	4																								79	4	81	4	84	3	78	3
05.10.2021	12:35:30	4																								79	4	80	4	82	3	78	3
05.10.2021	12:35:50	4																								86	4	82	3	82	2	78	3
05.10.2021	12:36:10	4																								80	4	81	4	82	3	80	3
05.10.2021	12:36:30	4																								80	4	80	4	82	3	80	3
05.10.2021	12:36:50	4																								79	4	80	4	81	3	80	3
05.10.2021	12:37:10	4																								78	4	80	4	81	3	80	3
05.10.2021	12:37:30	4																								78	4	80	4	81	3	78	3
05.10.2021	12:37:50	4																								78	4	80	4	81	3	78	3
05.10.2021	12:38:10	4																								79	4	80	4	81	3	78	3
05.10.2021	12:38:30	4																								79	4	81	4	81	3	78	3
05.10.2021	12:38:50	4																								79	4	81	4	82	3	78	3
05.10.2021	12:39:10	4																								79	4	81	4	81	3	78	3
05.10.2021	12:39:30	4																								79	4	81	4	83	3	80	3
05.10.2021	12:39:50	4																								80	4	81	4	82	2	80	3
05.10.2021	12:40:10	4																								79	4	83	3	82	3	80	3
05.10.2021	12:40:30	4																								80	4	81	4	82	3	80	3
05.10.2021	12:40:50	4																								79	4	82	4	82	3	78	3
05.10.2021	12:41:10	4																								79	4	82	4	82	3	78	3
05.10.2021	12:41:30	4																								80	4	82	4	82	2	78	3
05.10.2021	12:41:50	4																								80	4	82	4	81	3	78	3
05.10.2021	12:42:10	4																								80	4	82	4	82	3	78	3
05.10.2021	12:42:30	4																								80	4	83	4	81	3	78	3
05.10.2021	12:42:50	4																								81	4	82	4	81	3	80	3
05.10.2021	12:43:10	4																								80	4	82	4	82	2	80	3
05.10.2021	12:43:30	4																								80	4	82	3	80	3	80	3
05.10.2021	12:43:50	4																								80	4	82	4	82	2	80	3
05.10.2021	12:44:10	4																								81	4	82	4	80	3	80	3
05.10.2021	12:44:30	4																								80	4	83	4	82	3	80	3
05.10.2021	12:44:50	4																								81	4	82	4	80	2	80	3
05.10.2021	12:45:10	4																								80	4	82	4	82	3	80	3

## Sheet: ID 3
Date	Time	Technology	CO	sCO	CI	sCI	SV	SVI	PR	SYSART	DIAART	MAP	SVR	SVRI	SVV	PRV	PPV	EDV	sEDV	EDVI	sEDVI	RVEF	sRVEF	ScvO₂/SvO₂	SQI	StO₂ A1	TPI A1	StO₂ A2	TPI A2	StO₂ B1	TPI B1	StO₂ B2	TPI B2
		1-F, 4-SG	L/min	L/min	L/min/m²	L/min/m²	mL/b	mL/b/m²	bpm	mmHg	mmHg	mmHg	dyne-s/cm⁵	dyne-s-m²/cm⁵	%		%	mL	mL	mL/m²	mL/m²	% EFU	% EFU	%		%		%		%		%
10/06/2021	11:40:04 am	4																									65535		65535		65535		65535
10/06/2021	11:40:24 am	4																									65535		65535		65535		65535
10/06/2021	11:40:44 am	4																									65535		65535		65535		65535
10/06/2021	11:41:04 am	4																									65535		65535		65535		65535
10/06/2021	11:41:24 am	4																									65535		65535		65535		65535
10/06/2021	11:41:44 am	4																									65535		65535		65535		65535
10/06/2021	11:42:04 am	4																									65535		65535		65535		65535
10/06/2021	11:42:24 am	4
10/06/2021	11:42:44 am	4
10/06/2021	11:43:04 am	4
10/06/2021	11:43:24 am	4
10/06/2021	11:43:44 am	4
10/06/2021	11:44:04 am	4
10/06/2021	11:44:24 am	4
10/06/2021	11:44:44 am	4																								69	4	68	4	60	4	57	4
10/06/2021	11:45:04 am	4																								69	4	68	4	60	4	57	4
10/06/2021	11:45:24 am	4																								68	4	68	4	60	4	57	4
10/06/2021	11:45:44 am	4																								68	4	68	4	61	4	57	4
10/06/2021	11:46:04 am	4																								68	4	68	4	60	4	57	4
10/06/2021	11:46:24 am	4																								68	4	68	4	60	4	57	4
10/06/2021	11:46:44 am	4																								69	4	68	4	61	4	57	4
10/06/2021	11:47:04 am	4																								68	4	68	4	60	4	56	4
10/06/2021	11:47:24 am	4																								69	4	68	4	61	4	57	4
10/06/2021	11:47:44 am	4																								69	4	68	4	61	4	63	4
10/06/2021	11:48:04 am	4																								69	4	68	4	60	4	71	4
10/06/2021	11:48:24 am	4																								69	4	69	4	61	4	70	4
10/06/2021	11:48:44 am	4																								69	4	69	4	61	4	68	4
10/06/2021	11:49:04 am	4																								69	4	69	4	61	4	66	4
10/06/2021	11:49:24 am	4																								69	4	69	4	61	4	64	4
10/06/2021	11:49:44 am	4																								69	4	68	4	61	4	62	4
10/06/2021	11:50:04 am	4																								69	4	68	4	61	4	62	4
10/06/2021	11:50:24 am	4																								69	4	68	4	62	4	62	4
10/06/2021	11:50:44 am	4																								69	4	68	4	62	4	62	4
10/06/2021	11:51:04 am	4																								69	4	69	4	62	4	62	4
10/06/2021	11:51:24 am	4																								69	4	68	4	62	4	62	4
10/06/2021	11:51:44 am	4																								69	4	68	4	62	4	62	4
10/06/2021	11:52:04 am	4																								69	4	68	4	62	4	62	4
10/06/2021	11:52:24 am	4																								69	4	68	4	71	4	65	4
10/06/2021	11:52:44 am	4																								69	4	68	4	63	4	65	4
10/06/2021	11:53:04 am	4																								69	4	68	4	61	4	65	4
10/06/2021	11:53:24 am	4																								69	4	68	4	61	4	64	4
10/06/2021	11:53:44 am	4																								69	4	68	4	61	4	64	4
10/06/2021	11:54:04 am	4																								68	4	68	4	61	4	64	4
10/06/2021	11:54:24 am	4																								68	4	67	4	61	4	64	4
10/06/2021	11:54:44 am	4																								68	4	67	4	61	4	64	4
10/06/2021	11:55:04 am	4																								67	4	67	4	61	4	61	4
10/06/2021	11:55:24 am	4																								67	4	67	4	60	4	62	4
10/06/2021	11:55:44 am	4																								67	4	67	4	60	4	63	4
10/06/2021	11:56:04 am	4																								67	4	67	4	60	4	64	4
10/06/2021	11:56:24 am	4																								67	4	67	4	61	4	64	4
10/06/2021	11:56:44 am	4																								67	4	67	4	61	4	64	4
10/06/2021	11:57:04 am	4																								67	4	66	4	61	4	63	4
10/06/2021	11:57:24 am	4																								67	4	66	4	60	4	64	4
10/06/2021	11:57:44 am	4																								67	4	67	4	60	4	64	4
10/06/2021	11:58:04 am	4																								67	4	67	4	60	4	63	4
10/06/2021	11:58:24 am	4																								67	4	67	4	60	4	63	4
10/06/2021	11:58:44 am	4																								68	4	67	4	60	4	63	4
10/06/2021	11:59:04 am	4																								68	4	68	4	60	4	63	4
10/06/2021	11:59:24 am	4																								68	4	67	4	59	4	63	4
10/06/2021	11:59:44 am	4																								68	4	68	4	60	4	63	4
10/06/2021	12:00:04 pm	4																								68	4	68	4	60	4	63	4
10/06/2021	12:00:24 pm	4																								68	4	68	4	60	4	62	4
10/06/2021	12:00:44 pm	4																								68	4	68	4	60	4	63	4
10/06/2021	12:01:04 pm	4																								68	4	68	4	60	4	62	4
10/06/2021	12:01:24 pm	4																								69	4	66	4	61	4	62	4
10/06/2021	12:01:44 pm	4																								69	4	66	4	61	4	62	4
10/06/2021	12:02:04 pm	4																								69	4	66	4	62	4	62	4
10/06/2021	12:02:24 pm	4																								68	4	66	4	62	4	61	4
10/06/2021	12:02:44 pm	4																								67	4	66	4	61	4	62	4
10/06/2021	12:03:04 pm	4																								67	4	65	4	61	4	61	4
10/06/2021	12:03:24 pm	4																								68	4	66	4	61	4	61	4
10/06/2021	12:03:44 pm	4																								68	4	66	4	61	4	61	4
10/06/2021	12:04:04 pm	4																								69	4	67	4	61	4	61	4
10/06/2021	12:04:24 pm	4																								69	4	66	4	61	4	61	4
10/06/2021	12:04:44 pm	4																								69	4	67	4	61	4	61	4
10/06/2021	12:05:04 pm	4																								69	4	67	4	60	4	61	4
10/06/2021	12:05:24 pm	4																								69	4	67	4	60	4	61	4
10/06/2021	12:05:44 pm	4																								69	4	67	4	60	4	61	4
10/06/2021	12:06:04 pm	4																								69	4	67	4	60	4	61	4
10/06/2021	12:06:24 pm	4																								69	4	67	4	61	4	61	4
10/06/2021	12:06:44 pm	4																								69	4	67	4	61	4	62	4
10/06/2021	12:07:04 pm	4																								69	4	67	4	60	4	62	4
10/06/2021	12:07:24 pm	4																								68	4	65	4	60	4	62	4
10/06/2021	12:07:44 pm	4																								67	4	65	4	59	4	61	4
10/06/2021	12:08:04 pm	4																								66	4	64	4	58	4	61	4
10/06/2021	12:08:24 pm	4																								66	4	64	4	59	4	61	4
10/06/2021	12:08:44 pm	4																								66	4	64	4	60	4	62	4
10/06/2021	12:09:04 pm	4																								67	4	65	4	60	4	63	4
10/06/2021	12:09:24 pm	4																								68	4	66	4	62	4	64	4
10/06/2021	12:09:44 pm	4																								68	4	66	4	62	4	65	4
10/06/2021	12:10:04 pm	4																								69	4	67	4	63	4	65	4
10/06/2021	12:10:24 pm	4																								68	4	66	4	63	4	66	4
10/06/2021	12:10:44 pm	4																								69	4	67	4	63	4	66	4
10/06/2021	12:11:04 pm	4																								69	4	67	4	63	4	65	4
10/06/2021	12:11:24 pm	4																								68	4	67	4	63	4	66	4
10/06/2021	12:11:44 pm	4																								68	4	67	4	62	4	66	4
10/06/2021	12:12:04 pm	4																								69	4	67	4	63	4	66	4
10/06/2021	12:12:24 pm	4																								70	4	67	4	63	4	66	4
10/06/2021	12:12:44 pm	4																								70	4	68	4	63	4	66	4
10/06/2021	12:13:04 pm	4																								70	4	68	4	63	4	66	4
10/06/2021	12:13:24 pm	4																								70	4	68	4	63	4	65	4
10/06/2021	12:13:44 pm	4																								70	4	69	4	63	4	65	4
10/06/2021	12:14:04 pm	4																								70	4	69	4	63	4	64	4
10/06/2021	12:14:24 pm	4																								71	4	70	4	64	4	65	4
10/06/2021	12:14:44 pm	4																								70	4	68	4	63	4	65	4
10/06/2021	12:15:04 pm	4																								70	4	68	4	63	4	65	4
10/06/2021	12:15:24 pm	4																								71	4	68	4	63	4	65	4
10/06/2021	12:15:44 pm	4																								71	4	69	4	63	4	64	4
10/06/2021	12:16:04 pm	4																								71	4	69	4	63	4	64	4
10/06/2021	12:16:24 pm	4																								71	4	70	4	63	4	64	4
10/06/2021	12:16:44 pm	4																								71	4	70	4	63	4	64	4
10/06/2021	12:17:04 pm	4																								72	4	70	4	64	4	63	4
10/06/2021	12:17:24 pm	4																								72	4	70	4	64	4	63	4
10/06/2021	12:17:44 pm	4																								72	4	70	4	64	4	63	4
10/06/2021	12:18:04 pm	4																								72	4	70	4	63	4	62	4
10/06/2021	12:18:24 pm	4																								72	4	70	4	63	4	62	4
10/06/2021	12:18:44 pm	4																								72	4	70	4	64	4	62	4
10/06/2021	12:19:04 pm	4																								73	4	70	4	64	4	62	4
10/06/2021	12:19:24 pm	4																								73	4	71	4	65	4	62	4
10/06/2021	12:19:44 pm	4																								73	4	70	4	65	4	62	4
10/06/2021	12:20:04 pm	4																								72	4	71	4	64	4	62	4
10/06/2021	12:20:24 pm	4																								73	4	70	4	64	4	62	4
10/06/2021	12:20:44 pm	4																								72	4	70	4	63	4	62	4
10/06/2021	12:21:04 pm	4																								73	4	70	4	63	4	62	4
10/06/2021	12:21:24 pm	4																								72	4	70	4	62	4	62	4
10/06/2021	12:21:44 pm	4																								73	4	70	4	63	4	62	4
10/06/2021	12:22:04 pm	4																								72	4	70	4	64	4	61	4
10/06/2021	12:22:24 pm	4																								72	4	70	4	63	4	62	4
10/06/2021	12:22:44 pm	4																								72	4	70	4	64	4	62	4
10/06/2021	12:23:04 pm	4																								73	4	70	4	64	4	62	4
10/06/2021	12:23:24 pm	4																								72	4	70	4	63	4	62	4
10/06/2021	12:23:44 pm	4																								71	4	70	4	63	4	63	4
10/06/2021	12:24:04 pm	4																								69	4	68	4	62	4	62	4
10/06/2021	12:24:24 pm	4																								69	4	68	4	62	4	63	4
10/06/2021	12:24:44 pm	4																								68	4	66	4	62	4	64	4
10/06/2021	12:25:04 pm	4																								67	4	66	4	63	4	65	4
10/06/2021	12:25:24 pm	4																								68	4	67	4	64	4	66	4
10/06/2021	12:25:44 pm	4																								68	4	67	4	65	4	67	4
10/06/2021	12:26:04 pm	4																								69	4	68	4	67	4	68	4
10/06/2021	12:26:24 pm	4																								70	4	68	4	68	4	70	4
10/06/2021	12:26:44 pm	4																								71	4	69	4	69	4	70	4
10/06/2021	12:27:04 pm	4																								71	4	70	4	69	4	69	4
10/06/2021	12:27:24 pm	4																								71	4	71	4	69	4	69	4
10/06/2021	12:27:44 pm	4																								72	4	71	4	69	4	69	4
10/06/2021	12:28:04 pm	4																								72	4	71	4	68	4	68	4
10/06/2021	12:28:24 pm	4																								73	4	71	4	68	4	68	4
10/06/2021	12:28:44 pm	4																								73	4	72	4	68	4	67	4
10/06/2021	12:29:04 pm	4																								73	4	72	4	67	4	67	4
10/06/2021	12:29:24 pm	4																								74	4	72	4	67	4	66	4
10/06/2021	12:29:44 pm	4																								74	4	72	4	68	4	66	4
10/06/2021	12:30:04 pm	4																								74	4	73	4	67	4	66	4
10/06/2021	12:30:24 pm	4																								74	4	73	4	67	4	65	4
10/06/2021	12:30:44 pm	4																								74	4	73	4	67	4	65	4
10/06/2021	12:31:04 pm	4																								74	4	73	4	67	4	64	4
10/06/2021	12:31:24 pm	4																								74	4	73	4	66	4	64	4
10/06/2021	12:31:44 pm	4																								75	4	74	4	66	4	64	4
10/06/2021	12:32:04 pm	4																								75	4	73	4	66	4	64	4
10/06/2021	12:32:24 pm	4																								75	4	74	4	67	4	63	4
10/06/2021	12:32:44 pm	4																								74	4	73	4	66	4	63	4
10/06/2021	12:33:04 pm	4																								74	4	74	4	66	4	63	4
10/06/2021	12:33:24 pm	4																								74	4	73	4	65	4	63	4
10/06/2021	12:33:44 pm	4																								74	4	73	4	66	4	63	4
10/06/2021	12:34:04 pm	4																								74	4	73	4	66	4	63	4
10/06/2021	12:34:24 pm	4																								74	4	72	4	65	4	63	4
10/06/2021	12:34:44 pm	4																								74	4	73	4	65	4	63	4
10/06/2021	12:35:04 pm	4																								74	4	73	4	64	4	62	4
10/06/2021	12:35:24 pm	4																								74	4	73	4	65	4	62	4
10/06/2021	12:35:44 pm	4																								74	4	72	4	65	4	62	4
10/06/2021	12:36:04 pm	4																								74	4	72	4	65	4	62	4
10/06/2021	12:36:24 pm	4																								73	4	71	4	64	4	62	4
10/06/2021	12:36:44 pm	4																								73	4	71	4	64	4	62	4
10/06/2021	12:37:04 pm	4																								73	4	71	4	64	4	62	4
10/06/2021	12:37:24 pm	4																								73	4	71	4	63	4	61	4
10/06/2021	12:37:44 pm	4																								72	4	71	4	63	4	61	4
10/06/2021	12:38:04 pm	4																								72	4	70	4	63	4	61	4
10/06/2021	12:38:24 pm	4																								71	4	70	4	63	4	61	4
10/06/2021	12:38:44 pm	4																								71	4	70	4	63	4	61	4
10/06/2021	12:39:04 pm	4																								72	4	70	4	63	4	61	4
10/06/2021	12:39:24 pm	4																								72	4	70	4	63	4	64	4
10/06/2021	12:39:44 pm	4																								72	4	70	4	63	4	64	4
10/06/2021	12:40:04 pm	4																								72	4	70	4	64	4	64	4
10/06/2021	12:40:24 pm	4																								73	4	71	4	64	4	64	4
10/06/2021	12:40:44 pm	4																								73	4	70	4	64	4	64	4
10/06/2021	12:41:04 pm	4																								72	4	71	4	64	4	64	4
10/06/2021	12:41:24 pm	4																								73	4	71	4	64	4	64	4
10/06/2021	12:41:44 pm	4																								73	4	71	4	64	4	64	4
10/06/2021	12:42:04 pm	4																								73	4	71	4	64	4	64	4
10/06/2021	12:42:24 pm	4																								73	4	71	4	64	4	64	4
10/06/2021	12:42:44 pm	4																								73	4	71	4	64	4	64	4
10/06/2021	12:43:04 pm	4																								73	4	71	4	64	4	64	4
10/06/2021	12:43:24 pm	4																								73	4	71	4	64	4	64	4
10/06/2021	12:43:44 pm	4																								73	4	71	4	64	4	64	4
10/06/2021	12:44:04 pm	4																								73	4	71	4	64	4	64	4
10/06/2021	12:44:24 pm	4																								73	4	71	4	64	4	64	4
10/06/2021	12:44:44 pm	4																								72	4	71	4	64	4	64	4
10/06/2021	12:45:04 pm	4																								72	4	70	4	64	4	64	4
10/06/2021	12:45:24 pm	4																								72	4	71	4	64	4	64	4
10/06/2021	12:45:44 pm	4																								72	4	70	4	64	4	64	4
10/06/2021	12:46:04 pm	4																								72	4	70	4	64	4	64	4
10/06/2021	12:46:24 pm	4																								73	4	69	4	64	4	64	4
10/06/2021	12:46:44 pm	4																								72	4	70	4	64	4	64	4
10/06/2021	12:47:04 pm	4																								72	4	70	4	64	4	64	4
10/06/2021	12:47:24 pm	4																								72	4	70	4	64	4	64	4
10/06/2021	12:47:44 pm	4																								72	4	71	4	63	4	64	4
10/06/2021	12:48:04 pm	4																								73	4	70	4	63	4	64	4
10/06/2021	12:48:24 pm	4																								72	4	71	4	64	4	64	4
10/06/2021	12:48:44 pm	4																								73	4	71	4	65	4	63	4
10/06/2021	12:49:04 pm	4																								73	4	71	4	65	4	65	4
10/06/2021	12:49:24 pm	4																								72	4	70	4	64	4	65	4
10/06/2021	12:49:44 pm	4																								73	4	70	4	65	4	65	4
10/06/2021	12:50:04 pm	4																								73	4	70	4	65	4	64	4
10/06/2021	12:50:24 pm	4																								73	4	70	4	64	4	64	4
10/06/2021	12:50:44 pm	4																								72	4	71	4	64	4	64	4
10/06/2021	12:51:04 pm	4																								72	4	70	4	65	4	64	4
10/06/2021	12:51:24 pm	4																								72	4	70	4	65	4	64	4
10/06/2021	12:51:44 pm	4																								72	4	70	4	65	4	64	4
10/06/2021	12:52:04 pm	4																								71	4	70	4	65	4	65	4
10/06/2021	12:52:24 pm	4																								71	4	69	4	65	4	65	4
10/06/2021	12:52:44 pm	4																								71	4	70	4	65	4	65	4
10/06/2021	12:53:04 pm	4																								71	4	70	4	65	4	66	4
10/06/2021	12:53:24 pm	4																								71	4	70	4	66	4	65	4
10/06/2021	12:53:44 pm	4																								72	4	70	4	65	4	65	4
10/06/2021	12:54:04 pm	4																								72	4	70	4	66	4	65	4
10/06/2021	12:54:24 pm	4																								72	4	69	4	65	4	65	4
10/06/2021	12:54:44 pm	4																								72	4	69	4	66	4	66	4
10/06/2021	12:55:04 pm	4																								72	4	69	4	65	4	66	4
10/06/2021	12:55:24 pm	4																								72	4	69	4	65	4	66	4
10/06/2021	12:55:44 pm	4																								72	4	69	4	65	4	66	4
10/06/2021	12:56:04 pm	4																								71	4	69	4	65	4	65	4
10/06/2021	12:56:24 pm	4																								71	4	69	4	65	4	65	4
10/06/2021	12:56:44 pm	4																								71	4	69	4	64	4	64	4
10/06/2021	12:57:04 pm	4																								71	4	69	4	64	4	64	4
10/06/2021	12:57:24 pm	4																								71	4	68	4	64	4	63	4
10/06/2021	12:57:44 pm	4																								71	4	69	4	64	4	63	4
10/06/2021	12:58:04 pm	4																								71	4	68	4	64	4	64	4
10/06/2021	12:58:24 pm	4																								70	4	68	4	63	4	63	4
10/06/2021	12:58:44 pm	4																								71	4	68	4	64	4	63	4
10/06/2021	12:59:04 pm	4																								71	4	69	4	64	4	64	4
10/06/2021	12:59:24 pm	4																								71	4	70	4	64	4	64	4
10/06/2021	12:59:44 pm	4																								72	4	70	4	64	4	64	4
10/06/2021	1:00:04 pm	4																								72	4	70	4	65	4	64	4
10/06/2021	1:00:24 pm	4																								72	4	70	4	65	4	64	4
10/06/2021	1:00:44 pm	4																								73	4	71	4	64	4	64	4
10/06/2021	1:01:04 pm	4																								73	4	71	4	65	4	64	4
10/06/2021	1:01:24 pm	4																								73	4	72	4	66	4	64	4
10/06/2021	1:01:44 pm	4																								74	4	71	4	66	4	64	4
10/06/2021	1:02:04 pm	4																								74	4	72	4	66	4	64	4
10/06/2021	1:02:24 pm	4																								75	4	72	4	67	4	64	4
10/06/2021	1:02:44 pm	4																								74	4	72	4	68	4	65	4
10/06/2021	1:03:04 pm	4																								73	4	71	4	67	4	66	4
10/06/2021	1:03:24 pm	4																								72	4	70	4	68	4	67	4
10/06/2021	1:03:44 pm	4																								72	4	70	4	68	4	68	4
10/06/2021	1:04:04 pm	4																								72	4	71	4	69	4	70	4
10/06/2021	1:04:24 pm	4																								73	4	71	4	71	4	71	4
10/06/2021	1:04:44 pm	4																								73	4	72	4	72	4	73	4
10/06/2021	1:05:04 pm	4																								74	4	74	4	74	4	75	4
10/06/2021	1:05:24 pm	4																								75	4	74	4	75	4	75	4
10/06/2021	1:05:44 pm	4																								75	4	75	4	75	4	75	4
10/06/2021	1:06:04 pm	4																								76	4	76	4	76	4	75	4
10/06/2021	1:06:24 pm	4																								77	4	77	4	77	4	75	4
10/06/2021	1:06:44 pm	4																								77	4	76	4	77	4	75	4
10/06/2021	1:07:04 pm	4																								77	4	77	4	77	4	75	4
10/06/2021	1:07:24 pm	4																								78	4	76	4	77	4	74	4
10/06/2021	1:07:44 pm	4																								78	4	76	4	76	4	73	4
10/06/2021	1:08:04 pm	4																								78	4	77	4	76	4	72	4
10/06/2021	1:08:24 pm	4																								79	4	77	4	76	4	72	4
10/06/2021	1:08:44 pm	4																								79	4	77	4	75	4	71	4
10/06/2021	1:09:04 pm	4																								78	4	77	4	75	4	70	4
10/06/2021	1:09:24 pm	4																								78	4	77	4	75	4	69	4
10/06/2021	1:09:44 pm	4																								78	4	76	4	73	4	68	4
10/06/2021	1:10:04 pm	4																								77	4	76	4	72	4	68	4
10/06/2021	1:10:24 pm	4																								77	4	76	4	72	4	67	4
10/06/2021	1:10:44 pm	4																								77	4	75	4	71	4	66	4
10/06/2021	1:11:04 pm	4																								77	4	75	4	71	4	66	4
10/06/2021	1:11:24 pm	4																								77	4	75	4	70	4	66	4
10/06/2021	1:11:44 pm	4																								77	4	76	4	71	4	66	4
10/06/2021	1:12:04 pm	4																								77	4	75	4	71	4	66	4
10/06/2021	1:12:24 pm	4																								77	4	75	4	70	4	65	4
10/06/2021	1:12:44 pm	4																								76	4	75	4	70	4	65	4
10/06/2021	1:13:04 pm	4																								77	4	76	4	70	4	65	4
10/06/2021	1:13:24 pm	4																								77	4	75	4	70	4	65	4
10/06/2021	1:13:44 pm	4																								76	4	75	4	70	4	65	4
10/06/2021	1:14:04 pm	4																								77	4	75	4	69	4	65	4
10/06/2021	1:14:24 pm	4																								77	4	76	4	69	4	64	4
10/06/2021	1:14:44 pm	4																								76	4	74	4	69	4	64	4
10/06/2021	1:15:04 pm	4																								75	4	74	4	68	4	64	4
10/06/2021	1:15:24 pm	4																								75	4	73	4	68	4	64	4
10/06/2021	1:15:44 pm	4																								76	4	74	4	69	4	64	4
10/06/2021	1:16:04 pm	4																								76	4	74	4	69	4	65	4
10/06/2021	1:16:24 pm	4																								75	4	74	4	69	4	64	4
10/06/2021	1:16:44 pm	4																								76	4	74	4	70	4	64	4
10/06/2021	1:17:04 pm	4																								76	4	74	4	70	4	64	4
10/06/2021	1:17:24 pm	4																								75	4	74	4	70	4	65	4
10/06/2021	1:17:44 pm	4																								75	4	74	4	70	4	65	4
10/06/2021	1:18:04 pm	4																								76	4	75	4	70	4	65	4
10/06/2021	1:18:24 pm	4																								76	4	74	4	70	4	65	4
10/06/2021	1:18:44 pm	4																								76	4	75	4	71	4	65	4
10/06/2021	1:19:04 pm	4																								77	4	75	4	71	4	65	4
10/06/2021	1:19:24 pm	4																								76	4	75	4	71	4	64	4
10/06/2021	1:19:44 pm	4																								76	4	74	4	70	4	64	4
10/06/2021	1:20:04 pm	4																								76	4	75	4	70	4	64	4
10/06/2021	1:20:24 pm	4																								76	4	75	4	70	4	64	4
10/06/2021	1:20:44 pm	4																								77	4	75	4	70	4	64	4
10/06/2021	1:21:04 pm	4																								76	4	75	4	70	4	64	4
10/06/2021	1:21:24 pm	4																								76	4	74	4	69	4	63	4
10/06/2021	1:21:44 pm	4																								76	4	75	4	69	4	63	4
10/06/2021	1:22:04 pm	4																								75	4	74	4	69	4	64	4
10/06/2021	1:22:24 pm	4																								75	4	74	4	69	4	64	4
10/06/2021	1:22:44 pm	4																								75	4	74	4	69	4	63	4
10/06/2021	1:23:04 pm	4																								75	4	74	4	69	4	63	4
10/06/2021	1:23:24 pm	4																								75	4	73	4	69	4	63	4
10/06/2021	1:23:44 pm	4																								75	4	74	4	69	4	64	4
10/06/2021	1:24:04 pm	4																								76	4	73	4	69	4	65	4
10/06/2021	1:24:24 pm	4																								76	4	74	4	70	4	65	4
10/06/2021	1:24:44 pm	4																								76	4	74	4	71	4	65	4
10/06/2021	1:25:04 pm	4																								75	4	73	4	70	4	64	4
10/06/2021	1:25:24 pm	4																								75	4	73	4	69	4	66	4
10/06/2021	1:25:44 pm	4																								75	4	74	4	70	4	66	4
10/06/2021	1:26:04 pm	4																								76	4	75	4	70	4	67	4
10/06/2021	1:26:24 pm	4																								76	4	75	4	70	4	68	4
10/06/2021	1:26:44 pm	4																								76	4	75	4	71	4	69	4
10/06/2021	1:27:04 pm	4																								77	4	75	4	72	4	69	4
10/06/2021	1:27:24 pm	4																								77	4	76	4	72	4	69	4
10/06/2021	1:27:44 pm	4																								78	4	76	4	72	4	69	4
10/06/2021	1:28:04 pm	4																								78	4	77	4	71	4	69	4
10/06/2021	1:28:24 pm	4																								78	4	77	4	72	4	69	4
10/06/2021	1:28:44 pm	4																								78	4	78	4	72	4	68	4
10/06/2021	1:29:04 pm	4																								78	4	77	4	72	4	68	4
10/06/2021	1:29:24 pm	4																								77	4	76	4	71	4	68	4
10/06/2021	1:29:44 pm	4																								77	4	76	4	71	4	67	4
10/06/2021	1:30:04 pm	4																								78	4	76	4	70	4	67	4
10/06/2021	1:30:24 pm	4																								78	4	76	4	71	4	67	4
10/06/2021	1:30:44 pm	4																								77	4	76	4	69	4	66	4
10/06/2021	1:31:04 pm	4																								77	4	76	4	71	4	66	4
10/06/2021	1:31:24 pm	4																								77	4	74	4	71	4	66	4
10/06/2021	1:31:44 pm	4																								77	4	74	4	71	4	65	4
10/06/2021	1:32:04 pm	4																								76	4	74	4	70	4	64	4
10/06/2021	1:32:24 pm	4																								76	4	74	4	70	4	63	4
10/06/2021	1:32:44 pm	4																								75	4	73	4	70	4	63	4
10/06/2021	1:33:04 pm	4																								75	4	73	4	69	4	63	4
10/06/2021	1:33:24 pm	4																								75	4	73	4	69	4	63	4
10/06/2021	1:33:44 pm	4																								75	4	73	4	69	4	62	4
10/06/2021	1:34:04 pm	4																								75	4	73	4	69	4	62	4
10/06/2021	1:34:24 pm	4																								75	4	73	4	70	4	62	4
10/06/2021	1:34:44 pm	4																								76	4	74	4	70	4	63	4
10/06/2021	1:35:04 pm	4																								76	4	74	4	70	4	64	4
10/06/2021	1:35:24 pm	4																								76	4	74	4	71	4	63	4
10/06/2021	1:35:44 pm	4																								76	4	74	4	71	4	63	4
10/06/2021	1:36:04 pm	4																								77	4	76	4	72	4	63	4
10/06/2021	1:36:24 pm	4																								77	4	75	4	72	4	65	4
10/06/2021	1:36:44 pm	4																								77	4	75	4	72	4	65	4
10/06/2021	1:37:04 pm	4																								77	4	75	4	72	4	65	4
10/06/2021	1:37:24 pm	4																								77	4	76	4	72	4	65	4
10/06/2021	1:37:44 pm	4																								78	4	76	4	72	4	65	4
10/06/2021	1:38:04 pm	4																								78	4	76	4	72	4	64	4
10/06/2021	1:38:24 pm	4																								77	4	76	4	72	4	64	4
10/06/2021	1:38:44 pm	4																								78	4	76	4	71	4	63	4
10/06/2021	1:39:04 pm	4																								78	4	76	4	72	4	64	4
10/06/2021	1:39:24 pm	4																								77	4	76	4	71	4	63	4
10/06/2021	1:39:44 pm	4																								78	4	76	4	71	4	63	4
10/06/2021	1:40:04 pm	4																								78	4	76	4	71	4	62	4
10/06/2021	1:40:24 pm	4																								77	4	77	4	71	4	62	4
10/06/2021	1:40:44 pm	4																								77	4	76	4	71	4	62	4
10/06/2021	1:41:04 pm	4																								77	4	76	4	71	4	65	4
10/06/2021	1:41:24 pm	4																								77	4	75	4	70	4	65	4
10/06/2021	1:41:44 pm	4																								77	4	76	4	70	4	65	4
10/06/2021	1:42:04 pm	4																								77	4	76	4	71	4	65	4
10/06/2021	1:42:24 pm	4																								77	4	75	4	69	4	65	4
10/06/2021	1:42:44 pm	4																								76	4	75	4	69	4	65	4
10/06/2021	1:43:04 pm	4																								76	4	74	4	69	4	65	4
10/06/2021	1:43:24 pm	4																								76	4	75	4	69	4	65	4
10/06/2021	1:43:44 pm	4																								74	4	76	4	70	4	65	4
10/06/2021	1:44:04 pm	4																								76	4	74	4	69	4	65	4
10/06/2021	1:44:24 pm	4																								76	4	75	4	69	4	65	4
10/06/2021	1:44:44 pm	4																								75	4	75	4	69	4	65	4
10/06/2021	1:45:04 pm	4																								76	4	75	4	70	4	65	4
10/06/2021	1:45:24 pm	4																								76	4	75	4	71	4	65	4
10/06/2021	1:45:44 pm	4																								76	4	74	4	71	4	65	4
10/06/2021	1:46:04 pm	4																								76	4	74	4	72	4	65	4
10/06/2021	1:46:24 pm	4																								76	4	74	4	72	4	65	4
10/06/2021	1:46:44 pm	4																								76	4	75	4	72	4	65	4
10/06/2021	1:47:04 pm	4																								77	4	75	4	73	4	65	4
10/06/2021	1:47:24 pm	4																								77	4	75	4	73	4	65	4
10/06/2021	1:47:44 pm	4																								77	4	75	4	73	4	65	4
10/06/2021	1:48:04 pm	4																								76	4	74	4	72	4	65	4
10/06/2021	1:48:24 pm	4																								76	4	74	4	73	4	65	4
10/06/2021	1:48:44 pm	4																								76	4	74	4	73	4	65	4
10/06/2021	1:49:04 pm	4																								76	4	74	4	73	4	65	4
10/06/2021	1:49:24 pm	4																								76	4	74	4	73	4	65	4
10/06/2021	1:49:44 pm	4																								77	4	74	4	73	4	65	4
10/06/2021	1:50:04 pm	4																								76	4	74	4	72	4	65	4
10/06/2021	1:50:24 pm	4																								75	4	73	4	72	4	65	4
10/06/2021	1:50:44 pm	4																								75	4	73	4	71	4	65	4
10/06/2021	1:51:04 pm	4																								75	4	74	4	72	4	63	4
10/06/2021	1:51:24 pm	4																								75	4	75	4	72	4	64	4
10/06/2021	1:51:44 pm	4																								76	4	75	4	73	4	65	4
10/06/2021	1:52:04 pm	4																								77	4	75	4	73	4	65	4
10/06/2021	1:52:24 pm	4																								77	4	75	4	73	4	65	4
10/06/2021	1:52:44 pm	4																								77	4	76	4	74	4	66	4
10/06/2021	1:53:04 pm	4																								78	4	76	4	74	4	66	4
10/06/2021	1:53:24 pm	4																								78	4	77	4	75	4	67	4
10/06/2021	1:53:44 pm	4																								78	4	78	4	74	4	68	4
10/06/2021	1:54:04 pm	4																								78	4	78	4	76	4	68	4
10/06/2021	1:54:24 pm	4																								79	4	76	4	77	4	68	4
10/06/2021	1:54:44 pm	4																								78	4	78	4	76	4	68	4
10/06/2021	1:55:04 pm	4																								78	4	77	4	76	4	68	4
10/06/2021	1:55:24 pm	4																								79	4	77	4	76	4	68	4
10/06/2021	1:55:44 pm	4																								79	4	77	4	75	4	68	4
10/06/2021	1:56:04 pm	4																								79	4	78	4	75	4	68	4
10/06/2021	1:56:24 pm	4																								79	4	78	4	76	4	68	4
10/06/2021	1:56:44 pm	4																								79	4	77	4	75	4	67	4
10/06/2021	1:57:04 pm	4																								79	4	78	4	76	4	67	4
10/06/2021	1:57:24 pm	4																								79	4	77	4	76	4	67	4
10/06/2021	1:57:44 pm	4																								79	4	78	4	76	4	67	4
10/06/2021	1:58:04 pm	4																								79	4	77	4	76	4	66	4
10/06/2021	1:58:24 pm	4																								80	4	78	4	76	4	66	4
10/06/2021	1:58:44 pm	4																								79	4	78	4	76	4	66	4
10/06/2021	1:59:04 pm	4																								79	4	78	4	75	4	66	4
10/06/2021	1:59:24 pm	4																								79	4	77	4	76	4	66	4
10/06/2021	1:59:44 pm	4																								79	4	77	4	75	4	66	4
10/06/2021	2:00:04 pm	4																								79	4	78	4	76	4	66	4
10/06/2021	2:00:24 pm	4																								79	4	78	4	77	4	65	4
10/06/2021	2:00:44 pm	4																								78	4	77	4	76	4	65	4
10/06/2021	2:01:04 pm	4																								78	4	76	4	75	4	65	4
10/06/2021	2:01:24 pm	4																								77	4	76	4	74	4	66	4
10/06/2021	2:01:44 pm	4																								77	4	75	4	73	4	67	4
10/06/2021	2:02:04 pm	4																								77	4	77	4	74	4	67	4
10/06/2021	2:02:24 pm	4																								77	4	76	4	74	4	68	4
10/06/2021	2:02:44 pm	4																								77	4	76	4	75	4	68	4
10/06/2021	2:03:04 pm	4																								77	4	75	4	75	4	69	4
10/06/2021	2:03:24 pm	4																								77	4	76	4	75	4	69	4
10/06/2021	2:03:44 pm	4																								78	4	76	4	75	4	69	4
10/06/2021	2:04:04 pm	4																								78	4	77	4	76	4	69	4
10/06/2021	2:04:24 pm	4																								78	4	77	4	76	4	69	4
10/06/2021	2:04:44 pm	4																								78	4	77	4	76	4	69	4
10/06/2021	2:05:04 pm	4																								77	4	78	4	76	4	68	4
10/06/2021	2:05:24 pm	4																								78	4	77	4	76	4	70	4
10/06/2021	2:05:44 pm	4																								79	4	77	4	78	4	69	4
10/06/2021	2:06:04 pm	4																								79	4	79	4	78	4	69	4
10/06/2021	2:06:24 pm	4																								79	4	79	4	76	4	70	4
10/06/2021	2:06:44 pm	4																								79	4	78	4	77	4	69	4
10/06/2021	2:07:04 pm	4																								77	4	77	4	77	4	69	4
10/06/2021	2:07:24 pm	4																								81	4	78	4	74	4	70	4
10/06/2021	2:07:44 pm	4																								79	4	78	4	76	4	69	4
10/06/2021	2:08:04 pm	4																								79	4	78	4	76	4	70	4
10/06/2021	2:08:24 pm	4																								79	4	77	4	76	4	70	4
10/06/2021	2:08:44 pm	4																								79	4	79	4	77	4	69	4
10/06/2021	2:09:04 pm	4																								79	4	79	4	76	4	70	4
10/06/2021	2:09:24 pm	4																								80	4	78	4	77	4	70	4
10/06/2021	2:09:44 pm	4																								80	4	78	4	76	4	70	4
10/06/2021	2:10:04 pm	4																								80	4	78	4	77	4	71	4
10/06/2021	2:10:24 pm	4																								80	4	78	4	78	4	71	4
10/06/2021	2:10:44 pm	4																								80	4	79	4	79	4	73	4
10/06/2021	2:11:04 pm	4																								79	4	78	4	79	4	74	4
10/06/2021	2:11:24 pm	4																								79	4	78	4	79	4	75	4
10/06/2021	2:11:44 pm	4																								79	4	78	4	80	4	77	4
10/06/2021	2:12:04 pm	4																								79	4	79	4	81	4	78	4
10/06/2021	2:12:24 pm	4																								79	4	78	4	82	4	79	4
10/06/2021	2:12:44 pm	4																								79	4	79	4	82	4	80	4
10/06/2021	2:13:04 pm	4																								80	4	78	4	83	4	80	4
10/06/2021	2:13:24 pm	4																								80	4	78	4	83	4	79	4
10/06/2021	2:13:44 pm	4																								80	4	78	4	83	4	79	4
10/06/2021	2:14:04 pm	4																								80	4	78	4	83	4	78	4
10/06/2021	2:14:24 pm	4																								80	4	79	4	83	4	78	4
10/06/2021	2:14:44 pm	4																								80	4	79	4	83	4	77	4
10/06/2021	2:15:04 pm	4																								81	4	79	4	83	4	77	4
10/06/2021	2:15:24 pm	4																								80	4	79	4	82	4	76	4
10/06/2021	2:15:44 pm	4																								80	4	79	4	82	4	76	4
10/06/2021	2:16:04 pm	4																								80	4	79	4	82	4	75	4
10/06/2021	2:16:24 pm	4																								81	4	79	4	80	4	76	4
10/06/2021	2:16:44 pm	4																								81	4	79	4	81	4	75	4
10/06/2021	2:17:04 pm	4																								81	4	81	4	82	4	76	4
10/06/2021	2:17:24 pm	4																								81	4	80	4	82	4	76	4
10/06/2021	2:17:44 pm	4																								81	4	80	4	80	4	75	4
10/06/2021	2:18:04 pm	4																								80	4	80	4	80	4	74	4
10/06/2021	2:18:24 pm	4																								80	4	79	4	79	4	73	4
10/06/2021	2:18:44 pm	4																								80	4	79	4	78	4	72	4
10/06/2021	2:19:04 pm	4																								80	4	79	4	78	4	72	4
10/06/2021	2:19:24 pm	4																								80	4	80	4	77	4	71	4
10/06/2021	2:19:44 pm	4																								80	4	78	4	76	4	71	4
10/06/2021	2:20:04 pm	4																								79	4	76	4	76	4	73	4
10/06/2021	2:20:24 pm	4																								78	4	76	4	75	4	73	4
10/06/2021	2:20:44 pm	4																								78	4	75	4	74	4	72	4
10/06/2021	2:21:04 pm	4																								78	4	74	4	74	4	71	4
10/06/2021	2:21:24 pm	4																								77	4	76	4	74	4	71	4
10/06/2021	2:21:44 pm	4																								78	4	75	4	74	4	71	4
10/06/2021	2:22:04 pm	4																								78	4	76	4	74	4	71	4
10/06/2021	2:22:24 pm	4																								79	4	76	4	75	4	70	4
10/06/2021	2:22:44 pm	4																								78	4	76	4	75	4	71	4
10/06/2021	2:23:04 pm	4																								78	4	75	4	75	4	71	4
10/06/2021	2:23:24 pm	4																								78	4	76	4	75	4	71	4
10/06/2021	2:23:44 pm	4																								78	4	76	4	74	4	72	4
10/06/2021	2:24:04 pm	4																								79	4	77	4	75	4	72	4
10/06/2021	2:24:24 pm	4																								79	4	77	4	75	4	73	4
10/06/2021	2:24:44 pm	4																								80	4	78	4	75	4	73	4
10/06/2021	2:25:04 pm	4																								80	4	78	4	77	4	73	4
10/06/2021	2:25:24 pm	4																								80	4	78	4	77	4	73	4
10/06/2021	2:25:44 pm	4																								81	4	80	4	77	4	73	4
10/06/2021	2:26:04 pm	4																								81	4	79	4	77	4	73	4
10/06/2021	2:26:24 pm	4																								81	4	80	4	77	4	72	4
10/06/2021	2:26:44 pm	4																								81	4	80	4	77	4	71	4
10/06/2021	2:27:04 pm	4																								81	4	79	4	77	4	71	4
10/06/2021	2:27:24 pm	4																								81	4	79	4	77	4	71	4
10/06/2021	2:27:44 pm	4																								81	4	79	4	76	4	70	4
10/06/2021	2:28:04 pm	4																								81	4	80	4	76	4	70	4
10/06/2021	2:28:24 pm	4																								81	4	79	4	76	4	70	4
10/06/2021	2:28:44 pm	4																								81	4	79	4	75	4	71	4
10/06/2021	2:29:04 pm	4																								81	4	79	4	75	4	71	4
10/06/2021	2:29:24 pm	4																								82	4	80	4	76	4	71	4
10/06/2021	2:29:44 pm	4																								82	4	80	4	76	4	71	4
10/06/2021	2:30:04 pm	4																								81	4	80	4	76	4	71	4
10/06/2021	2:30:24 pm	4																								81	4	80	4	75	4	71	4
10/06/2021	2:30:44 pm	4																								81	4	80	4	75	4	70	4
10/06/2021	2:31:04 pm	4																								81	4	79	4	75	4	70	4
10/06/2021	2:31:24 pm	4																								80	4	79	4	75	4	70	4
10/06/2021	2:31:44 pm	4																								80	4	78	4	75	4	70	4
10/06/2021	2:32:04 pm	4																								81	4	79	4	75	4	70	4
10/06/2021	2:32:24 pm	4																								81	4	79	4	75	4	70	4
10/06/2021	2:32:44 pm	4																								81	4	79	4	75	4	70	4
10/06/2021	2:33:04 pm	4																								82	4	79	4	74	4	71	4
10/06/2021	2:33:24 pm	4																								82	4	79	4	75	4	71	4
10/06/2021	2:33:44 pm	4																								82	4	79	4	76	4	71	4
10/06/2021	2:34:04 pm	4																								82	4	79	4	76	4	71	4
10/06/2021	2:34:24 pm	4																								82	4	78	4	76	4	71	4
10/06/2021	2:34:44 pm	4																								81	4	79	4	76	4	71	4
10/06/2021	2:35:04 pm	4																								82	4	79	4	76	4	72	4
10/06/2021	2:35:24 pm	4																								82	4	79	4	77	4	72	4
10/06/2021	2:35:44 pm	4																								83	4	80	4	79	4	73	4
10/06/2021	2:36:04 pm	4																								83	4	80	4	80	4	74	4
10/06/2021	2:36:24 pm	4																								83	4	80	4	80	4	74	4
10/06/2021	2:36:44 pm	4																								84	4	80	4	81	4	75	4
10/06/2021	2:37:04 pm	4																								84	4	81	4	81	4	76	4
10/06/2021	2:37:24 pm	4																								83	4	81	4	82	4	76	4
10/06/2021	2:37:44 pm	4																								84	4	80	4	82	4	76	4
10/06/2021	2:38:04 pm	4																								84	4	80	4	82	4	76	4
10/06/2021	2:38:24 pm	4																								83	4	80	4	82	4	75	4
10/06/2021	2:38:44 pm	4																								83	4	80	4	82	4	75	4
10/06/2021	2:39:04 pm	4																								83	4	80	4	81	4	74	4
10/06/2021	2:39:24 pm	4																								84	4	80	4	82	4	75	4
10/06/2021	2:39:44 pm	4																								84	4	80	4	82	4	74	4
10/06/2021	2:40:04 pm	4																								83	4	80	4	81	4	74	4
10/06/2021	2:40:24 pm	4																								83	4	80	4	79	4	74	4
10/06/2021	2:40:44 pm	4																								82	4	81	4	79	4	73	4
10/06/2021	2:41:04 pm	4																								81	4	79	4	78	4	72	4
10/06/2021	2:41:24 pm	4																								81	4	79	4	76	4	72	4
10/06/2021	2:41:44 pm	4																								80	4	78	4	76	4	71	4
10/06/2021	2:42:04 pm	4																								80	4	78	4	75	4	71	4
10/06/2021	2:42:24 pm	4																								80	4	77	4	74	4	70	4
10/06/2021	2:42:44 pm	4																								79	4	78	4	74	4	70	4
10/06/2021	2:43:04 pm	4																								79	4	76	4	74	4	70	4
10/06/2021	2:43:24 pm	4																								79	4	76	4	74	4	70	4
10/06/2021	2:43:44 pm	4																								80	4	76	4	74	4	70	4
10/06/2021	2:44:04 pm	4																								80	4	76	4	74	4	70	4
10/06/2021	2:44:24 pm	4																								80	4	77	4	74	4	70	4
10/06/2021	2:44:44 pm	4																								80	4	77	4	73	4	69	4
10/06/2021	2:45:04 pm	4																								80	4	77	4	73	4	70	4
10/06/2021	2:45:24 pm	4																								79	4	76	4	74	4	69	4
10/06/2021	2:45:44 pm	4																								79	4	77	4	73	4	69	4
10/06/2021	2:46:04 pm	4																								79	4	76	4	72	4	70	4
10/06/2021	2:46:24 pm	4																								79	4	77	4	73	4	69	4
10/06/2021	2:46:44 pm	4																								79	4	76	4	74	4	70	4
10/06/2021	2:47:04 pm	4																								80	4	78	4	73	4	70	4
10/06/2021	2:47:24 pm	4																								80	4	77	4	75	4	72	4
10/06/2021	2:47:44 pm	4																								81	4	78	4	76	4	70	4
10/06/2021	2:48:04 pm	4																								80	4	78	4	76	4	72	4
10/06/2021	2:48:24 pm	4																								80	4	78	4	75	4	72	4
10/06/2021	2:48:44 pm	4																								80	4	77	4	76	4	72	4
10/06/2021	2:49:04 pm	4																								80	4	78	4	75	4	72	4
10/06/2021	2:49:24 pm	4																								80	4	78	4	76	4	73	4
10/06/2021	2:49:44 pm	4																								80	4	77	4	75	4	72	4
10/06/2021	2:50:04 pm	4																								80	4	78	4	77	4	72	4
10/06/2021	2:50:24 pm	4																								80	4	78	4	76	4	71	4
10/06/2021	2:50:44 pm	4																								81	4	79	4	77	4	72	4
10/06/2021	2:51:04 pm	4																								81	4	78	4	77	4	72	4
10/06/2021	2:51:24 pm	4																								81	4	79	4	77	4	72	4
10/06/2021	2:51:44 pm	4																								80	4	78	4	77	4	72	4
10/06/2021	2:52:04 pm	4																								81	4	79	4	78	4	72	4
10/06/2021	2:52:24 pm	4																								81	4	78	4	77	4	72	4
10/06/2021	2:52:44 pm	4																								81	4	78	4	77	4	71	4
10/06/2021	2:53:04 pm	4																								82	4	78	4	79	4	72	4

## Sheet: ID 4
Date	Time	Technology	CO	sCO	CI	sCI	SV	SVI	PR	SYSART	DIAART	MAP	SVR	SVRI	SVV	PRV	PPV	EDV	sEDV	EDVI	sEDVI	RVEF	sRVEF	ScvO₂/SvO₂	SQI	StO₂ A1	TPI A1	StO₂ A2	TPI A2	StO₂ B1	TPI B1	StO₂ B2	TPI B2
		1-F, 4-SG	L/min	L/min	L/min/m²	L/min/m²	mL/b	mL/b/m²	bpm	mmHg	mmHg	mmHg	dyne-s/cm⁵	dyne-s-m²/cm⁵	%		%	mL	mL	mL/m²	mL/m²	% EFU	% EFU	%		%		%		%		%
10/07/2021	9:09:21 am	4																									65535		65535		65535		65535
10/07/2021	9:09:41 am	4																									65535		65535		65535		65535
10/07/2021	9:10:01 am	4																									65535		65535		65535		65535
10/07/2021	9:10:21 am	4																									65535		65535		65535		65535
10/07/2021	9:10:41 am	4																									65535		65535		65535		65535
10/07/2021	9:11:01 am	4																									65535		65535		65535		65535
10/07/2021	9:11:21 am	4																									65535		65535		65535		65535
10/07/2021	9:11:41 am	4
10/07/2021	9:12:01 am	4
10/07/2021	9:12:21 am	4
10/07/2021	9:12:41 am	4
10/07/2021	9:13:01 am	4
10/07/2021	9:13:21 am	4
10/07/2021	9:13:41 am	4
10/07/2021	9:14:01 am	4
10/07/2021	9:14:21 am	4
10/07/2021	9:14:41 am	4
10/07/2021	9:15:01 am	4
10/07/2021	9:15:21 am	4
10/07/2021	9:15:41 am	4
10/07/2021	9:16:01 am	4
10/07/2021	9:16:21 am	4
10/07/2021	9:16:41 am	4
10/07/2021	9:17:01 am	4
10/07/2021	9:17:21 am	4
10/07/2021	9:17:41 am	4
10/07/2021	9:18:01 am	4
10/07/2021	9:18:21 am	4
10/07/2021	9:18:41 am	4
10/07/2021	9:19:01 am	4
10/07/2021	9:19:21 am	4
10/07/2021	9:19:41 am	4
10/07/2021	9:20:01 am	4
10/07/2021	9:20:21 am	4
10/07/2021	9:20:41 am	4
10/07/2021	9:21:01 am	4
10/07/2021	9:21:21 am	4
10/07/2021	9:21:41 am	4																								77	3	73	4	65	4	61	4
10/07/2021	9:22:01 am	4																								77	3	73	4	65	4	61	4
10/07/2021	9:22:21 am	4																								77	3	73	4	65	4	61	4
10/07/2021	9:22:41 am	4																								77	3	73	4	65	4	61	4
10/07/2021	9:23:01 am	4																								76	3	73	4	64	4	61	4
10/07/2021	9:23:21 am	4																								80	3	74	4	64	4	59	4
10/07/2021	9:23:41 am	4																								78	3	73	4	64	4	60	4
10/07/2021	9:24:01 am	4																								77	3	72	4	64	4	60	4
10/07/2021	9:24:21 am	4																								78	3	73	4	64	4	61	4
10/07/2021	9:24:41 am	4																								77	3	74	4	64	4	62	4
10/07/2021	9:25:01 am	4																								77	3	74	4	65	4	63	4
10/07/2021	9:25:21 am	4																								77	3	74	4	66	4	64	4
10/07/2021	9:25:41 am	4																								76	3	74	4	67	4	65	4
10/07/2021	9:26:01 am	4																								76	3	74	4	68	4	65	4
10/07/2021	9:26:21 am	4																								77	3	75	4	70	4	67	4
10/07/2021	9:26:41 am	4																								77	3	75	4	70	4	67	4
10/07/2021	9:27:01 am	4																								76	3	75	4	71	4	67	4
10/07/2021	9:27:21 am	4																								77	3	75	4	71	4	66	4
10/07/2021	9:27:41 am	4																								77	3	75	4	73	4	68	4
10/07/2021	9:28:01 am	4																								77	3	74	4	72	4	65	4
10/07/2021	9:28:21 am	4																								77	3	76	4	66	4	74	4
10/07/2021	9:28:41 am	4																								77	3	78	4	72	4	75	4
10/07/2021	9:29:01 am	4																								77	3	75	4	72	4	71	4
10/07/2021	9:29:21 am	4																								77	3	75	4	72	4	71	4
10/07/2021	9:29:41 am	4																								77	3	74	4	71	4	66	4
10/07/2021	9:30:01 am	4																								77	3	74	4	73	4	65	4
10/07/2021	9:30:21 am	4																								77	3	74	4	73	4	65	4
10/07/2021	9:30:41 am	4																								77	3	73	4	73	4	65	4
10/07/2021	9:31:01 am	4																								76	3	73	4	75	4	72	4
10/07/2021	9:31:21 am	4																								76	3	73	4	75	4	70	4
10/07/2021	9:31:41 am	4																								76	3	72	4	73	4	69	4
10/07/2021	9:32:01 am	4																								76	3	72	4	71	4	71	4
10/07/2021	9:32:21 am	4																								76	3	73	4	71	4	73	4
10/07/2021	9:32:41 am	4																								76	3	72	4	71	4	72	4
10/07/2021	9:33:01 am	4																								75	3	71	4	70	4	71	4
10/07/2021	9:33:21 am	4																								75	3	71	4	71	4	69	4
10/07/2021	9:33:41 am	4																								75	3	71	4	70	4	68	4
10/07/2021	9:34:01 am	4																								76	3	71	4	70	4	68	4
10/07/2021	9:34:21 am	4																								75	3	71	4	69	4	68	4
10/07/2021	9:34:41 am	4																								75	3	71	4	69	4	68	4
10/07/2021	9:35:01 am	4																								76	3	71	4	69	4	67	4
10/07/2021	9:35:21 am	4																								78	3	73	4	69	4	65	4
10/07/2021	9:35:41 am	4																								78	3	74	4	69	4	65	4
10/07/2021	9:36:01 am	4																								78	3	74	4	69	4	65	4
10/07/2021	9:36:21 am	4																								77	3	73	4	70	4	64	4
10/07/2021	9:36:41 am	4																								77	3	78	4	76	4	74	4
10/07/2021	9:37:01 am	4																								77	3	82	4	90	4	83	4
10/07/2021	9:37:21 am	4																								86	3	83	4	91	4	88	4
10/07/2021	9:37:41 am	4																								85	3	79	4	90	4	87	4
10/07/2021	9:38:01 am	4																								84	3	77	4	86	4	85	4
10/07/2021	9:38:21 am	4																								88	3	79	4	86	4	85	4
10/07/2021	9:38:41 am	4																								89	3	83	4	83	4	74	4
10/07/2021	9:39:01 am	4																								89	3	84	4	84	4	74	4
10/07/2021	9:39:21 am	4																								86	3	85	4	85	4	74	4
10/07/2021	9:39:41 am	4																								82	3	85	4	86	4	74	4
10/07/2021	9:40:01 am	4																								77	3	85	4	89	4	74	4
10/07/2021	9:40:21 am	4																								77	3	83	4	88	4	74	4
10/07/2021	9:40:41 am	4																								77	3	83	4	89	4	74	4
10/07/2021	9:41:01 am	4																								76	3	82	4	89	4	74	4
10/07/2021	9:41:21 am	4																								75	3	82	4	87	4	74	4
10/07/2021	9:41:41 am	4																								74	3	81	4	86	4	74	4
10/07/2021	9:42:01 am	4																								73	3	81	4	84	4	74	4
10/07/2021	9:42:21 am	4																								72	3	82	4	82	4	74	4
10/07/2021	9:42:41 am	4																								71	3	81	4	79	4	74	4
10/07/2021	9:43:01 am	4																								71	3	80	4	76	4	74	4
10/07/2021	9:43:21 am	4																								71	3	82	4	78	4	74	4
10/07/2021	9:43:41 am	4																								71	3	78	4	74	4	67	4
10/07/2021	9:44:01 am	4																								70	3	76	4	73	4	69	4
10/07/2021	9:44:21 am	4																								70	3	75	4	72	4	65	4
10/07/2021	9:44:41 am	4																								69	3	75	4	70	4	64	4
10/07/2021	9:45:01 am	4																								69	3	74	4	69	4	62	4
10/07/2021	9:45:21 am	4																								69	3	74	4	68	4	61	4
10/07/2021	9:45:41 am	4																								68	3	73	4	67	4	61	4
10/07/2021	9:46:01 am	4																								69	3	74	4	69	4	61	4
10/07/2021	9:46:21 am	4																								69	3	75	4	74	4	62	4
10/07/2021	9:46:41 am	4																								70	3	76	4	78	4	61	4
10/07/2021	9:47:01 am	4																								70	3	77	4	79	4	61	4
10/07/2021	9:47:21 am	4																								70	3	76	4	77	4	62	4
10/07/2021	9:47:41 am	4																								69	3	76	4	77	4	63	4
10/07/2021	9:48:01 am	4																								69	3	76	4	75	4	62	4
10/07/2021	9:48:21 am	4																								70	3	78	4	75	4	61	4
10/07/2021	9:48:41 am	4																								71	3	78	4	77	4	61	4
10/07/2021	9:49:01 am	4																								70	3	77	4	76	4	61	4
10/07/2021	9:49:21 am	4																								69	3	76	4	75	4	60	4
10/07/2021	9:49:41 am	4																								69	3	76	4	74	4	60	4
10/07/2021	9:50:01 am	4																								69	3	75	4	72	4	59	4
10/07/2021	9:50:21 am	4																								68	3	75	4	71	4	58	4
10/07/2021	9:50:41 am	4																								68	3	75	4	70	4	58	4
10/07/2021	9:51:01 am	4																								67	3	74	4	69	4	58	4
10/07/2021	9:51:21 am	4																								67	3	73	4	68	4	58	4
10/07/2021	9:51:41 am	4																								66	3	73	4	67	4	58	4
10/07/2021	9:52:01 am	4																								66	3	73	4	67	4	58	4
10/07/2021	9:52:21 am	4																								65	3	72	4	66	4	58	4
10/07/2021	9:52:41 am	4																								65	3	71	4	66	4	58	4
10/07/2021	9:53:01 am	4																								64	3	70	4	65	4	58	4
10/07/2021	9:53:21 am	4																								64	3	70	4	65	4	58	4
10/07/2021	9:53:41 am	4																								64	3	69	4	63	4	58	4
10/07/2021	9:54:01 am	4																								64	3	69	4	62	4	58	4
10/07/2021	9:54:21 am	4																								64	3	70	4	61	4	58	4
10/07/2021	9:54:41 am	4																								63	3	70	4	61	4	58	4
10/07/2021	9:55:01 am	4																								64	3	69	4	59	4	58	4
10/07/2021	9:55:21 am	4																								63	3	68	4	58	4	58	4
10/07/2021	9:55:41 am	4																								63	3	68	4	58	4	59	4
10/07/2021	9:56:01 am	4																								62	3	68	4	57	4	59	4
10/07/2021	9:56:21 am	4																								63	3	67	4	57	4	59	4
10/07/2021	9:56:41 am	4																								62	3	66	4	57	4	59	4
10/07/2021	9:57:01 am	4																								63	3	68	4	58	4	59	4
10/07/2021	9:57:21 am	4																								63	3	68	4	58	4	59	4
10/07/2021	9:57:41 am	4																								63	3	68	4	60	4	59	4
10/07/2021	9:58:01 am	4																								63	3	68	4	60	4	59	4
10/07/2021	9:58:21 am	4																								62	3	69	4	59	4	59	4
10/07/2021	9:58:41 am	4																								63	3	69	4	60	4	59	4
10/07/2021	9:59:01 am	4																								63	3	69	4	59	4	59	4
10/07/2021	9:59:21 am	4																								62	3	68	4	58	4	59	4
10/07/2021	9:59:41 am	4																								63	3	68	4	58	4	59	4
10/07/2021	10:00:01 am	4																								62	3	68	4	58	4	59	4
10/07/2021	10:00:21 am	4																								62	3	68	4	58	4	59	4
10/07/2021	10:00:41 am	4																								62	3	68	4	58	4	59	4
10/07/2021	10:01:01 am	4																								62	3	68	4	57	4	59	4
10/07/2021	10:01:21 am	4																								63	3	69	4	58	4	59	4
10/07/2021	10:01:41 am	4																								63	3	69	4	58	4	59	4
10/07/2021	10:02:01 am	4																								63	3	68	4	57	4	59	4
10/07/2021	10:02:21 am	4																								62	3	68	4	57	4	57	4
10/07/2021	10:02:41 am	4																								63	3	69	4	57	4	57	4
10/07/2021	10:03:01 am	4																								63	3	68	4	57	4	57	4
10/07/2021	10:03:21 am	4																								63	3	68	4	57	4	57	4
10/07/2021	10:03:41 am	4																								63	3	68	4	57	4	57	4
10/07/2021	10:04:01 am	4																								65	3	68	4	57	4	57	4
10/07/2021	10:04:21 am	4																								64	3	69	4	56	4	57	4
10/07/2021	10:04:41 am	4																								63	3	68	4	58	4	57	4
10/07/2021	10:05:01 am	4																								65	3	68	4	63	4	57	4
10/07/2021	10:05:21 am	4																								64	3	70	4	61	4	57	4
10/07/2021	10:05:41 am	4																								64	3	68	4	61	4	57	4
10/07/2021	10:06:01 am	4																								64	3	68	4	60	4	57	4
10/07/2021	10:06:21 am	4																								63	3	70	4	62	4	57	4
10/07/2021	10:06:41 am	4																								64	3	68	4	71	4	57	4
10/07/2021	10:07:01 am	4																								67	3	68	4	62	4	57	4
10/07/2021	10:07:21 am	4																								66	3	69	4	64	4	57	4
10/07/2021	10:07:41 am	4																								64	3	69	4	62	4	57	4
10/07/2021	10:08:01 am	4																								66	3	68	4	62	4	56	4
10/07/2021	10:08:21 am	4																								65	3	67	4	60	4	57	4
10/07/2021	10:08:41 am	4																								64	3	69	4	61	4	55	4
10/07/2021	10:09:01 am	4																								65	3	68	4	60	4	59	4
10/07/2021	10:09:21 am	4																								64	3	67	4	57	4	55	4
10/07/2021	10:09:41 am	4																								63	3	67	4	59	4	59	4
10/07/2021	10:10:01 am	4																								67	3	67	4	61	4	60	4
10/07/2021	10:10:21 am	4																								65	3	69	4	60	4	57	4
10/07/2021	10:10:41 am	4																								68	3	71	4	60	4	56	4
10/07/2021	10:11:01 am	4																								67	3	71	4	65	4	57	4
10/07/2021	10:11:21 am	4																								70	3	76	4	68	4	58	4
10/07/2021	10:11:41 am	4																								68	3	76	4	67	4	52	4
10/07/2021	10:12:01 am	4																								69	3	76	4	70	4	64	4
10/07/2021	10:12:21 am	4																								68	3	71	4	71	4	76	4
10/07/2021	10:12:41 am	4																								70	3	72	4	73	4	77	4
10/07/2021	10:13:01 am	4																								70	3	73	4	72	4	80	4
10/07/2021	10:13:21 am	4																								70	3	70	4	69	4	79	4
10/07/2021	10:13:41 am	4																								70	3	71	4	68	4	84	4
10/07/2021	10:14:01 am	4																								70	3	75	4	68	4	81	4
10/07/2021	10:14:21 am	4																								69	3	70	4	74	4	74	4
10/07/2021	10:14:41 am	4																								70	3	71	4	67	4	78	4
10/07/2021	10:15:01 am	4																								71	3	72	4	68	4	74	4
10/07/2021	10:15:21 am	4																								70	3	78	4	64	4	70	4
10/07/2021	10:15:41 am	4																								77	3	80	4	64	4	69	4
10/07/2021	10:16:01 am	4																								75	3	78	4	64	4	68	4
10/07/2021	10:16:21 am	4																								65	3	78	4	64	4	60	4
10/07/2021	10:16:41 am	4																								72	3	77	4	64	4	60	4
10/07/2021	10:17:01 am	4																								73	3	78	4	64	4	60	4
10/07/2021	10:17:21 am	4																								69	3	83	4	64	4	60	4
10/07/2021	10:17:41 am	4																								69	3	83	4	64	4	62	4
10/07/2021	10:18:01 am	4																								69	3	83	4	64	4	57	4
10/07/2021	10:18:21 am	4																								69	3	83	4	64	4	68	4
10/07/2021	10:18:41 am	4																								80	3	86	4	64	4	66	4
10/07/2021	10:19:01 am	4																								69	3	77	4	64	4	61	4
10/07/2021	10:19:21 am	4																								66	3	78	4	64	4	66	4
10/07/2021	10:19:41 am	4																								66	3	80	4	64	4	66	4
10/07/2021	10:20:01 am	4																								66	3	87	4	64	4	66	4
10/07/2021	10:20:21 am	4																								66	3	76	4	64	4	66	4
10/07/2021	10:20:41 am	4																								68	3	75	4	64	4	66	4
10/07/2021	10:21:01 am	4																								69	3	76	4	64	4	53	4
10/07/2021	10:21:21 am	4																								70	3	74	4	64	4	62	4
10/07/2021	10:21:41 am	4																								70	3	81	4	64	4	69	4
10/07/2021	10:22:01 am	4																								70	3	82	4	65	4	70	4
10/07/2021	10:22:21 am	4																								69	3	80	4	64	4	68	4
10/07/2021	10:22:41 am	4																								68	3	80	4	65	4	66	4
10/07/2021	10:23:01 am	4																								69	3	77	4	64	4	73	4
10/07/2021	10:23:21 am	4																								69	3	76	4	64	4	73	4
10/07/2021	10:23:41 am	4																								69	3	76	4	64	4	72	4
10/07/2021	10:24:01 am	4																								70	3	79	4	65	4	72	4
10/07/2021	10:24:21 am	4																								72	3	84	4	67	4	71	4
10/07/2021	10:24:41 am	4																								73	3	84	4	65	4	71	4
10/07/2021	10:25:01 am	4																								75	3	81	4	67	4	69	4
10/07/2021	10:25:21 am	4																								74	3	81	4	68	4	69	4
10/07/2021	10:25:41 am	4																								74	3	83	4	69	4	71	4
10/07/2021	10:26:01 am	4																								75	3	82	4	69	4	69	4
10/07/2021	10:26:21 am	4																								75	3	82	4	69	4	67	4
10/07/2021	10:26:41 am	4																								75	3	81	4	69	4	68	4
10/07/2021	10:27:01 am	4																								75	3	81	4	70	4	68	4
10/07/2021	10:27:21 am	4																								75	3	81	4	71	4	69	4
10/07/2021	10:27:41 am	4																								76	3	82	4	74	4	67	4
10/07/2021	10:28:01 am	4																								76	3	83	4	73	4	70	4
10/07/2021	10:28:21 am	4																								76	3	83	4	74	4	73	4
10/07/2021	10:28:41 am	4																								77	3	81	4	72	4	72	4
10/07/2021	10:29:01 am	4																								76	3	82	4	73	4	70	4
10/07/2021	10:29:21 am	4																								76	3	82	4	73	4	71	4
10/07/2021	10:29:41 am	4																								76	3	83	4	73	4	72	4
10/07/2021	10:30:01 am	4																								76	3	83	4	74	4	72	4
10/07/2021	10:30:21 am	4																								77	3	83	4	75	4	73	4
10/07/2021	10:30:41 am	4																								76	3	83	4	74	4	74	4
10/07/2021	10:31:01 am	4																								76	3	82	4	75	4	75	4
10/07/2021	10:31:21 am	4																								77	3	82	4	75	4	75	4
10/07/2021	10:31:41 am	4																								77	3	82	4	76	4	76	4
10/07/2021	10:32:01 am	4																								77	3	83	4	78	4	77	4
10/07/2021	10:32:21 am	4																								78	3	84	4	79	4	77	4
10/07/2021	10:32:41 am	4																								78	3	84	4	79	4	78	4
10/07/2021	10:33:01 am	4																								79	3	85	4	81	4	80	4
10/07/2021	10:33:21 am	4																								79	3	85	4	81	4	81	4
10/07/2021	10:33:41 am	4																								80	3	86	4	82	4	82	4
10/07/2021	10:34:01 am	4																								80	3	86	4	82	4	82	4
10/07/2021	10:34:21 am	4																								81	3	87	4	83	4	82	4
10/07/2021	10:34:41 am	4																								81	3	87	4	82	4	82	4
10/07/2021	10:35:01 am	4																								81	3	86	4	83	4	83	4
10/07/2021	10:35:21 am	4																								81	3	87	4	83	4	83	4
10/07/2021	10:35:41 am	4																								81	3	87	4	82	4	83	4
10/07/2021	10:36:01 am	4																								81	3	87	4	83	4	84	4
10/07/2021	10:36:21 am	4																								80	3	87	4	83	4	83	4
10/07/2021	10:36:41 am	4																								80	3	87	4	83	4	83	4
10/07/2021	10:37:01 am	4																								81	3	88	4	84	4	83	4
10/07/2021	10:37:21 am	4																								81	3	88	4	84	4	84	4
10/07/2021	10:37:41 am	4																								81	3	88	4	84	4	84	4
10/07/2021	10:38:01 am	4																								82	3	88	4	84	4	84	4
10/07/2021	10:38:21 am	4																								83	3	88	4	84	4	85	4
10/07/2021	10:38:41 am	4																								83	3	89	4	86	4	84	4
10/07/2021	10:39:01 am	4																								83	3	89	4	84	4	85	4
10/07/2021	10:39:21 am	4																								83	3	89	4	86	4	85	4
10/07/2021	10:39:41 am	4																								84	3	89	4	85	4	85	4
10/07/2021	10:40:01 am	4																								84	3	89	4	85	4	86	4
10/07/2021	10:40:21 am	4																								84	3	89	4	86	4	85	4
10/07/2021	10:40:41 am	4																								85	3	89	4	86	4	85	4
10/07/2021	10:41:01 am	4																								85	3	89	4	87	4	85	4
10/07/2021	10:41:21 am	4																								86	3	90	4	88	4	85	4
10/07/2021	10:41:41 am	4																								87	3	90	4	88	4	85	4
10/07/2021	10:42:01 am	4																								87	3	90	4	88	4	84	4
10/07/2021	10:42:21 am	4																								88	3	90	4	88	4	84	4
10/07/2021	10:42:41 am	4																								88	3	90	4	88	4	84	4
10/07/2021	10:43:01 am	4																								88	3	90	4	87	4	84	4
10/07/2021	10:43:21 am	4																								88	3	90	4	88	4	84	4
10/07/2021	10:43:41 am	4																								88	3	90	4	88	4	83	4
10/07/2021	10:44:01 am	4																								87	3	90	4	87	4	81	4
10/07/2021	10:44:21 am	4																								89	3	92	4	89	4	84	4
10/07/2021	10:44:41 am	4																								89	3	92	4	89	4	86	4
10/07/2021	10:45:01 am	4																								88	3	92	4	88	4	87	4
10/07/2021	10:45:21 am	4																								88	3	91	4	88	4	86	4
10/07/2021	10:45:41 am	4																								87	3	90	4	87	4	83	4
10/07/2021	10:46:01 am	4																								86	3	90	4	87	4	82	4
10/07/2021	10:46:21 am	4																								86	3	89	4	86	4	81	4
10/07/2021	10:46:41 am	4																								85	3	89	4	85	4	80	4
10/07/2021	10:47:01 am	4																								87	3	90	4	88	4	80	4
10/07/2021	10:47:21 am	4																								88	3	91	4	89	4	81	4
10/07/2021	10:47:41 am	4																								88	3	91	4	89	4	82	4
10/07/2021	10:48:01 am	4																								88	3	91	4	89	4	84	4
10/07/2021	10:48:21 am	4																								88	3	92	4	89	4	85	4
10/07/2021	10:48:41 am	4																								89	3	93	4	90	4	86	4
10/07/2021	10:49:01 am	4																								89	3	93	4	91	4	89	4
10/07/2021	10:49:21 am	4																								88	3	92	4	91	4	89	4
10/07/2021	10:49:41 am	4																								88	3	92	4	90	4	89	4
10/07/2021	10:50:01 am	4																								87	3	91	4	90	4	89	4
10/07/2021	10:50:21 am	4																								87	3	91	4	90	4	88	4
10/07/2021	10:50:41 am	4																								85	3	90	4	89	4	88	4
10/07/2021	10:51:01 am	4																								83	3	90	4	89	4	88	4
10/07/2021	10:51:21 am	4																								83	3	90	4	89	4	86	4
10/07/2021	10:51:41 am	4																								83	3	90	4	88	4	86	4
10/07/2021	10:52:01 am	4																								83	3	90	4	88	4	87	4
10/07/2021	10:52:21 am	4																								84	3	89	4	88	4	86	4
10/07/2021	10:52:41 am	4																								83	3	89	4	88	4	85	4
10/07/2021	10:53:01 am	4																								84	3	89	4	88	4	84	4
10/07/2021	10:53:21 am	4																								83	3	89	4	85	4	82	4
10/07/2021	10:53:41 am	4																								82	3	89	4	84	4	82	4
10/07/2021	10:54:01 am	4																								82	3	88	4	84	4	81	4
10/07/2021	10:54:21 am	4																								81	3	87	4	84	4	81	4
10/07/2021	10:54:41 am	4																								81	3	88	4	85	4	83	4
10/07/2021	10:55:01 am	4																								81	3	89	4	85	4	84	4
10/07/2021	10:55:21 am	4																								82	3	89	4	85	4	84	4
10/07/2021	10:55:41 am	4																								81	3	88	4	85	4	83	4
10/07/2021	10:56:01 am	4																								81	3	88	4	85	4	82	4
10/07/2021	10:56:21 am	4																								79	3	88	4	84	4	84	4
10/07/2021	10:56:41 am	4																								78	3	88	4	84	4	84	4
10/07/2021	10:57:01 am	4																								78	3	88	4	84	4	84	4
10/07/2021	10:57:21 am	4																								78	3	88	4	85	4	86	4
10/07/2021	10:57:41 am	4																								78	3	88	4	85	4	87	4
10/07/2021	10:58:01 am	4																								79	3	88	4	85	4	87	4
10/07/2021	10:58:21 am	4																								79	3	88	4	85	4	87	4
10/07/2021	10:58:41 am	4																								79	3	88	4	84	4	86	4
10/07/2021	10:59:01 am	4																								78	3	88	4	83	4	86	4
10/07/2021	10:59:21 am	4																								78	3	89	4	82	4	87	4
10/07/2021	10:59:41 am	4																								79	3	87	4	85	4	83	4
10/07/2021	11:00:01 am	4																								79	3	87	4	87	4	87	4
10/07/2021	11:00:21 am	4																								79	3	88	4	89	4	87	4
10/07/2021	11:00:41 am	4																								79	3	89	4	85	4	88	4
10/07/2021	11:01:01 am	4																								79	3	88	4	84	4	89	4
10/07/2021	11:01:21 am	4																								78	3	88	4	86	4	87	4
10/07/2021	11:01:41 am	4																								78	3	89	4	87	4	89	4
10/07/2021	11:02:01 am	4																								77	3	89	4	84	4	90	4
10/07/2021	11:02:21 am	4																								77	3	89	4	87	4	90	4
10/07/2021	11:02:41 am	4																								77	3	89	4	86	4	89	4
10/07/2021	11:03:01 am	4																								77	3	84	4	85	4	89	4
10/07/2021	11:03:21 am	4																								77	3	84	4	84	4	89	4
10/07/2021	11:03:41 am	4																								77	3	86	4	85	4	88	4
10/07/2021	11:04:01 am	4																								77	3	85	4	83	4	89	4
10/07/2021	11:04:21 am	4																								76	3	84	4	83	4	88	4
10/07/2021	11:04:41 am	4																								76	3	84	4	85	4	88	4
10/07/2021	11:05:01 am	4																								76	3	85	4	85	4	88	4
10/07/2021	11:05:21 am	4																								76	3	86	4	83	4	89	4
10/07/2021	11:05:41 am	4																								76	3	86	4	83	4	89	4
10/07/2021	11:06:01 am	4																								76	3	85	4	86	4	88	4
10/07/2021	11:06:21 am	4																								76	3	86	4	85	4	85	4
10/07/2021	11:06:41 am	4																								76	3	85	4	84	4	88	4
10/07/2021	11:07:01 am	4																								76	3	85	4	84	4	88	4
10/07/2021	11:07:21 am	4																								76	3	85	4	83	4	86	4
10/07/2021	11:07:41 am	4																								76	3	84	4	83	4	87	4
10/07/2021	11:08:01 am	4																								76	3	85	4	84	4	87	4
10/07/2021	11:08:21 am	4																								77	3	86	4	84	4	88	4
10/07/2021	11:08:41 am	4																								77	3	87	4	86	4	88	4
10/07/2021	11:09:01 am	4																								78	3	87	4	87	4	89	4
10/07/2021	11:09:21 am	4																								78	3	88	4	87	4	89	4
10/07/2021	11:09:41 am	4																								79	3	88	4	88	4	89	4
10/07/2021	11:10:01 am	4																								79	3	87	4	89	4	89	4
10/07/2021	11:10:21 am	4																								78	3	88	4	87	4	89	4
10/07/2021	11:10:41 am	4																								78	3	88	4	85	4	88	4
10/07/2021	11:11:01 am	4																								77	3	87	4	84	4	88	4
10/07/2021	11:11:21 am	4																								77	3	87	4	84	4	88	4
10/07/2021	11:11:41 am	4																								77	3	87	4	85	4	87	4
10/07/2021	11:12:01 am	4																								77	3	87	4	83	4	88	4
10/07/2021	11:12:21 am	4																								77	3	87	4	83	4	87	4
10/07/2021	11:12:41 am	4																								77	3	87	4	82	4	86	4
10/07/2021	11:13:01 am	4																								77	3	87	4	82	4	86	4
10/07/2021	11:13:21 am	4																								77	3	87	4	84	4	85	4
10/07/2021	11:13:41 am	4																								77	3	87	4	84	4	84	4
10/07/2021	11:14:01 am	4																								77	3	87	4	83	4	84	4
10/07/2021	11:14:21 am	4																								77	3	87	4	82	4	84	4
10/07/2021	11:14:41 am	4																								77	3	87	4	82	4	82	4
10/07/2021	11:15:01 am	4																								77	3	87	4	82	4	81	4
10/07/2021	11:15:21 am	4																								78	3	87	4	83	4	80	4
10/07/2021	11:15:41 am	4																								78	3	87	4	82	4	81	4
10/07/2021	11:16:01 am	4																								78	3	87	4	83	4	81	4
10/07/2021	11:16:21 am	4																								78	3	88	4	83	4	80	4
10/07/2021	11:16:41 am	4																								78	3	87	4	82	4	80	4
10/07/2021	11:17:01 am	4																								77	3	87	4	81	4	80	4
10/07/2021	11:17:21 am	4																								78	3	87	4	84	4	79	4
10/07/2021	11:17:41 am	4																								78	3	87	4	82	4	79	4
10/07/2021	11:18:01 am	4																								78	3	87	4	82	4	80	4
10/07/2021	11:18:21 am	4																								78	3	87	4	82	4	80	4
10/07/2021	11:18:41 am	4																								78	3	87	4	83	4	80	4
10/07/2021	11:19:01 am	4																								79	3	87	4	84	4	80	4
10/07/2021	11:19:21 am	4																								78	3	88	4	83	4	79	4
10/07/2021	11:19:41 am	4																								78	3	87	4	82	4	80	4
10/07/2021	11:20:01 am	4																								78	3	88	4	82	4	79	4
10/07/2021	11:20:21 am	4																								79	3	88	4	80	4	79	4
10/07/2021	11:20:41 am	4																								78	3	88	4	82	4	78	4
10/07/2021	11:21:01 am	4																								79	3	88	4	83	4	78	4
10/07/2021	11:21:21 am	4																								78	3	88	4	82	4	79	4
10/07/2021	11:21:41 am	4																								78	3	88	4	82	4	79	4
10/07/2021	11:22:01 am	4																								79	3	88	4	83	4	79	4
10/07/2021	11:22:21 am	4																								79	3	88	4	82	4	79	4
10/07/2021	11:22:41 am	4																								79	3	88	4	82	4	79	4
10/07/2021	11:23:01 am	4																								79	3	88	4	82	4	78	4
10/07/2021	11:23:21 am	4																								78	3	88	4	82	4	78	4
10/07/2021	11:23:41 am	4																								78	3	88	4	81	4	78	4
10/07/2021	11:24:01 am	4																								79	3	87	4	81	4	77	4
10/07/2021	11:24:21 am	4																								78	3	88	4	81	4	78	4
10/07/2021	11:24:41 am	4																								79	3	88	4	83	4	77	4
10/07/2021	11:25:01 am	4																								79	3	88	4	82	4	77	4
10/07/2021	11:25:21 am	4																								78	3	89	4	83	4	76	4
10/07/2021	11:25:41 am	4																								78	3	89	4	82	4	76	4
10/07/2021	11:26:01 am	4																								78	3	89	4	81	4	77	4
10/07/2021	11:26:21 am	4																								78	3	89	4	80	4	78	4
10/07/2021	11:26:41 am	4																								78	3	89	4	84	4	83	4
10/07/2021	11:27:01 am	4																								78	3	89	4	78	4	72	4
10/07/2021	11:27:21 am	4																								78	3	88	4	80	4	77	4
10/07/2021	11:27:41 am	4																								78	3	89	4	80	4	77	4
10/07/2021	11:28:01 am	4																								78	3	89	4	80	4	78	4
10/07/2021	11:28:21 am	4																								78	3	89	4	80	4	79	4
10/07/2021	11:28:41 am	4																								78	3	89	4	76	4	75	4
10/07/2021	11:29:01 am	4																								77	3	89	4	79	4	77	4
10/07/2021	11:29:21 am	4																								78	3	88	4	80	4	78	4
10/07/2021	11:29:41 am	4																								77	3	89	4	80	4	77	4
10/07/2021	11:30:01 am	4																								77	3	89	4	79	4	77	4
10/07/2021	11:30:21 am	4																								77	3	89	4	74	4	73	4
10/07/2021	11:30:41 am	4																								77	3	89	4	81	4	78	4
10/07/2021	11:31:01 am	4																								77	3	88	4	78	4	76	4
10/07/2021	11:31:21 am	4																								77	3	88	4	79	4	76	4
10/07/2021	11:31:41 am	4																								77	3	89	4	80	4	76	4
10/07/2021	11:32:01 am	4																								77	3	88	4	80	4	76	4
10/07/2021	11:32:21 am	4																								77	3	88	4	79	4	75	4
10/07/2021	11:32:41 am	4																								78	3	88	4	80	4	75	4
10/07/2021	11:33:01 am	4																								78	3	88	4	80	4	76	4
10/07/2021	11:33:21 am	4																								78	3	89	4	80	4	76	4
10/07/2021	11:33:41 am	4																								77	3	89	4	79	4	75	4
10/07/2021	11:34:01 am	4																								78	3	88	4	81	4	75	4
10/07/2021	11:34:21 am	4																								77	3	88	4	81	4	74	4
10/07/2021	11:34:41 am	4																								77	3	89	4	80	4	74	4
10/07/2021	11:35:01 am	4																								78	3	89	4	80	4	75	4
10/07/2021	11:35:21 am	4																								77	3	88	4	80	4	76	4
10/07/2021	11:35:41 am	4																								77	3	88	4	81	4	75	4
10/07/2021	11:36:01 am	4																								77	3	88	4	79	4	75	4
10/07/2021	11:36:21 am	4																								78	3	88	4	79	4	75	4
10/07/2021	11:36:41 am	4																								78	3	88	4	80	4	75	4
10/07/2021	11:37:01 am	4																								78	3	88	4	82	4	76	4
10/07/2021	11:37:21 am	4																								78	3	88	4	83	4	76	4
10/07/2021	11:37:41 am	4																								78	3	88	4	81	4	76	4
10/07/2021	11:38:01 am	4																								78	3	88	4	81	4	75	4
10/07/2021	11:38:21 am	4																								78	3	88	4	81	4	76	4
10/07/2021	11:38:41 am	4																								78	3	88	4	80	4	76	4
10/07/2021	11:39:01 am	4																								77	3	88	4	80	4	75	4
10/07/2021	11:39:21 am	4																								78	3	88	4	80	4	75	4
10/07/2021	11:39:41 am	4																								78	3	88	4	80	4	76	4
10/07/2021	11:40:01 am	4																								77	3	87	4	80	4	75	4
10/07/2021	11:40:21 am	4																								77	3	87	4	80	4	75	4
10/07/2021	11:40:41 am	4																								77	3	88	4	80	4	74	4
10/07/2021	11:41:01 am	4																								77	3	87	4	80	4	74	4
10/07/2021	11:41:21 am	4																								77	3	87	4	79	4	73	4
10/07/2021	11:41:41 am	4																								76	3	87	4	79	4	73	4
10/07/2021	11:42:01 am	4																								77	3	87	4	79	4	73	4
10/07/2021	11:42:21 am	4																								77	3	87	4	78	4	73	4
10/07/2021	11:42:41 am	4																								77	3	86	4	78	4	72	4
10/07/2021	11:43:01 am	4																								76	3	85	4	78	4	72	4
10/07/2021	11:43:21 am	4																								76	3	85	4	78	4	71	4
10/07/2021	11:43:41 am	4																								76	3	86	4	79	4	73	4
10/07/2021	11:44:01 am	4																								76	3	86	4	79	4	72	4
10/07/2021	11:44:21 am	4																								76	3	85	4	79	4	71	4
10/07/2021	11:44:41 am	4																								75	3	86	4	79	4	72	4
10/07/2021	11:45:01 am	4																								75	3	86	4	79	4	72	4
10/07/2021	11:45:21 am	4																								75	3	85	4	80	4	72	4
10/07/2021	11:45:41 am	4																								75	3	86	4	79	4	71	4
10/07/2021	11:46:01 am	4																								75	3	86	4	78	4	71	4
10/07/2021	11:46:21 am	4																								75	3	85	4	78	4	71	4
10/07/2021	11:46:41 am	4																								75	3	85	4	78	4	70	4
10/07/2021	11:47:01 am	4																								75	3	86	4	78	4	70	4
10/07/2021	11:47:21 am	4																								75	3	85	4	78	4	70	4
10/07/2021	11:47:41 am	4																								75	3	85	4	77	4	70	4
10/07/2021	11:48:01 am	4																								75	3	85	4	77	4	69	4
10/07/2021	11:48:21 am	4																								75	3	85	4	76	4	69	4
10/07/2021	11:48:41 am	4																								75	3	85	4	76	4	69	4
10/07/2021	11:49:01 am	4																								75	3	85	4	76	4	70	4
10/07/2021	11:49:21 am	4																								75	3	85	4	76	4	69	4
10/07/2021	11:49:41 am	4																								75	3	84	4	76	4	69	4
10/07/2021	11:50:01 am	4																								75	3	85	4	75	4	69	4
10/07/2021	11:50:21 am	4																								73	3	85	4	74	4	69	4
10/07/2021	11:50:41 am	4																								73	3	84	4	74	4	68	4
10/07/2021	11:51:01 am	4																								73	3	85	4	71	4	68	4
10/07/2021	11:51:21 am	4																								73	3	85	4	68	4	68	4
10/07/2021	11:51:41 am	4																								72	3	85	4	68	4	68	4
10/07/2021	11:52:01 am	4																								72	3	84	4	67	4	67	4
10/07/2021	11:52:21 am	4																								72	3	84	4	68	4	68	4
10/07/2021	11:52:41 am	4																								72	3	84	4	68	4	68	4
10/07/2021	11:53:01 am	4																								72	3	84	4	68	4	67	4
10/07/2021	11:53:21 am	4																								72	3	84	4	69	4	67	4
10/07/2021	11:53:41 am	4																								72	3	84	4	69	4	67	4
10/07/2021	11:54:01 am	4																								72	3	84	4	69	4	68	4
10/07/2021	11:54:21 am	4																								72	3	84	4	69	4	68	4
10/07/2021	11:54:41 am	4																								72	3	84	4	70	4	68	4
10/07/2021	11:55:01 am	4																								73	3	85	4	69	4	67	4
10/07/2021	11:55:21 am	4																								73	3	84	4	69	4	67	4
10/07/2021	11:55:41 am	4																								72	3	84	4	69	4	68	4
10/07/2021	11:56:01 am	4																								73	3	85	4	69	4	68	4
10/07/2021	11:56:21 am	4																								73	3	85	4	70	4	67	4
10/07/2021	11:56:41 am	4																								73	3	85	4	70	4	67	4
10/07/2021	11:57:01 am	4																								73	3	85	4	71	4	67	4
10/07/2021	11:57:21 am	4																								73	3	85	4	70	4	68	4
10/07/2021	11:57:41 am	4																								73	3	85	4	71	4	68	4
10/07/2021	11:58:01 am	4																								73	3	85	4	72	4	68	4
10/07/2021	11:58:21 am	4																								73	3	85	4	72	4	68	4
10/07/2021	11:58:41 am	4																								73	3	86	4	72	4	68	4
10/07/2021	11:59:01 am	4																								73	3	86	4	72	4	68	4
10/07/2021	11:59:21 am	4																								73	3	86	4	72	4	68	4
10/07/2021	11:59:41 am	4																								73	3	85	4	72	4	68	4
10/07/2021	12:00:01 pm	4																								73	3	85	4	72	4	68	4
10/07/2021	12:00:21 pm	4																								73	3	85	4	71	4	68	4
10/07/2021	12:00:41 pm	4																								73	3	85	4	71	4	68	4
10/07/2021	12:01:01 pm	4																								73	3	85	4	71	4	68	4
10/07/2021	12:01:21 pm	4																								73	3	85	4	71	4	68	4
10/07/2021	12:01:41 pm	4																								73	3	85	4	71	4	67	4
10/07/2021	12:02:01 pm	4																								73	3	85	4	71	4	67	4
10/07/2021	12:02:21 pm	4																								73	3	85	4	71	4	68	4
10/07/2021	12:02:41 pm	4																								73	3	85	4	72	4	68	4
10/07/2021	12:03:01 pm	4																								73	3	85	4	71	4	67	4
10/07/2021	12:03:21 pm	4																								73	3	85	4	71	4	67	4
10/07/2021	12:03:41 pm	4																								73	3	84	4	72	4	66	4
10/07/2021	12:04:01 pm	4																								73	3	85	4	72	4	67	4
10/07/2021	12:04:21 pm	4																								73	3	85	4	71	4	68	4
10/07/2021	12:04:41 pm	4																								73	3	85	4	72	4	67	4
10/07/2021	12:05:01 pm	4																								73	3	85	4	71	4	67	4
10/07/2021	12:05:21 pm	4																								73	3	85	4	72	4	67	4
10/07/2021	12:05:41 pm	4																								73	3	84	4	70	4	66	4
10/07/2021	12:06:01 pm	4																								73	3	85	4	66	4	67	4
10/07/2021	12:06:21 pm	4																								73	3	85	4	65	4	67	4
10/07/2021	12:06:41 pm	4																								73	3	85	4	65	4	67	4
10/07/2021	12:07:01 pm	4																								73	3	85	4	66	4	67	4
10/07/2021	12:07:21 pm	4																								72	3	85	4	66	4	67	4
10/07/2021	12:07:41 pm	4																								73	3	85	4	66	4	67	4
10/07/2021	12:08:01 pm	4																								73	3	85	4	66	4	67	4
10/07/2021	12:08:21 pm	4																								73	3	85	4	66	4	68	4
10/07/2021	12:08:41 pm	4																								73	3	85	4	66	4	67	4
10/07/2021	12:09:01 pm	4																								73	3	85	4	66	4	67	4
10/07/2021	12:09:21 pm	4																								74	3	85	4	66	4	67	4
10/07/2021	12:09:41 pm	4																								74	3	85	4	66	4	67	4
10/07/2021	12:10:01 pm	4																								74	3	86	4	66	4	67	4
10/07/2021	12:10:21 pm	4																								74	3	86	4	67	4	67	4
10/07/2021	12:10:41 pm	4																								74	3	86	4	67	4	67	4
10/07/2021	12:11:01 pm	4																								74	3	86	4	66	4	67	4
10/07/2021	12:11:21 pm	4																								74	3	86	4	66	4	68	4
10/07/2021	12:11:41 pm	4																								74	3	86	4	66	4	67	4
10/07/2021	12:12:01 pm	4																								74	3	86	4	66	4	67	4
10/07/2021	12:12:21 pm	4																								74	3	87	4	67	4	67	4
10/07/2021	12:12:41 pm	4																								74	3	86	4	67	4	67	4
10/07/2021	12:13:01 pm	4																								74	3	86	4	67	4	67	4
10/07/2021	12:13:21 pm	4																								75	3	85	4	71	4	67	4
10/07/2021	12:13:41 pm	4																								76	3	86	4	75	4	67	4
10/07/2021	12:14:01 pm	4																								76	3	87	4	76	4	68	4
10/07/2021	12:14:21 pm	4																								76	3	86	4	76	4	67	4
10/07/2021	12:14:41 pm	4																								76	3	86	4	78	4	68	4
10/07/2021	12:15:01 pm	4																								77	3	86	4	75	4	68	4
10/07/2021	12:15:21 pm	4																								75	3	86	4	78	4	68	4
10/07/2021	12:15:41 pm	4																								73	3	86	4	77	4	67	4
10/07/2021	12:16:01 pm	4																								72	3	85	4	74	4	66	4
10/07/2021	12:16:21 pm	4																								70	3	83	4	70	4	64	4
10/07/2021	12:16:41 pm	4																								69	3	80	4	66	4	62	4
10/07/2021	12:17:01 pm	4																								70	3	81	4	68	4	61	4
10/07/2021	12:17:21 pm	4																								71	3	80	4	70	4	61	4
10/07/2021	12:17:41 pm	4																								72	3	82	4	73	4	64	4
10/07/2021	12:18:01 pm	4																								74	3	83	4	73	4	64	4
10/07/2021	12:18:21 pm	4																								75	3	85	4	73	4	64	4
10/07/2021	12:18:41 pm	4																								75	3	86	4	73	4	64	4
10/07/2021	12:19:01 pm	4																								74	3	85	4	73	4	64	4
10/07/2021	12:19:21 pm	4																								74	3	85	4	73	4	64	4
10/07/2021	12:19:41 pm	4																								74	3	85	4	73	4	64	4
10/07/2021	12:20:01 pm	4																								74	3	85	4	73	4	64	4
10/07/2021	12:20:21 pm	4																								76	3	85	4	73	4	70	4
10/07/2021	12:20:41 pm	4																								78	3	86	4	73	4	58	4
10/07/2021	12:21:01 pm	4																								78	3	87	4	73	4	57	4
10/07/2021	12:21:21 pm	4																								77	3	86	4	73	4	72	4
10/07/2021	12:21:41 pm	4																								76	3	86	4	73	4	74	4
10/07/2021	12:22:01 pm	4																								76	3	87	4	78	4	70	4
10/07/2021	12:22:21 pm	4																								76	3	87	4	78	4	71	4
10/07/2021	12:22:41 pm	4																								76	3	86	4	78	4	90	4
10/07/2021	12:23:01 pm	4																								75	3	86	4	76	4	71	4
10/07/2021	12:23:21 pm	4																								75	3	87	4	76	4	81	4
10/07/2021	12:23:41 pm	4																								75	3	87	4	80	4	72	4
10/07/2021	12:24:01 pm	4																								75	3	88	4	76	4	72	4
10/07/2021	12:24:21 pm	4																								76	3	87	4	76	4	72	4
10/07/2021	12:24:41 pm	4																								76	3	87	4	76	4	72	4
10/07/2021	12:25:01 pm	4																								76	3	87	4	76	4	72	4
10/07/2021	12:25:21 pm	4																								75	3	87	4	76	4	72	4
10/07/2021	12:25:41 pm	4																								75	3	87	4	76	4	72	4
10/07/2021	12:26:01 pm	4																								75	3	88	4	76	4	70	4
10/07/2021	12:26:21 pm	4																								74	3	87	4	77	4	71	4
10/07/2021	12:26:41 pm	4																								75	3	88	4	78	4	72	4
10/07/2021	12:27:01 pm	4																								75	3	88	4	78	4	73	4
10/07/2021	12:27:21 pm	4																								75	3	88	4	78	4	73	4
10/07/2021	12:27:41 pm	4																								75	3	87	4	78	4	73	4
10/07/2021	12:28:01 pm	4																								75	3	87	4	78	4	73	4
10/07/2021	12:28:21 pm	4																								74	3	87	4	78	4	73	4
10/07/2021	12:28:41 pm	4																								75	3	87	4	78	4	72	4
10/07/2021	12:29:01 pm	4																								75	3	87	4	78	4	73	4
10/07/2021	12:29:21 pm	4																								74	3	87	4	78	4	73	4
10/07/2021	12:29:41 pm	4																								74	3	88	4	78	4	72	4
10/07/2021	12:30:01 pm	4																								74	3	88	4	79	4	72	4
10/07/2021	12:30:21 pm	4																								74	3	87	4	78	4	71	4
10/07/2021	12:30:41 pm	4																								74	3	87	4	79	4	72	4
10/07/2021	12:31:01 pm	4																								74	3	88	4	79	4	71	4
10/07/2021	12:31:21 pm	4																								74	3	88	4	80	4	72	4
10/07/2021	12:31:41 pm	4																								74	3	88	4	80	4	72	4
10/07/2021	12:32:01 pm	4																								74	3	88	4	79	4	72	4
10/07/2021	12:32:21 pm	4																								74	3	88	4	80	4	72	4
10/07/2021	12:32:41 pm	4																								74	3	87	4	80	4	72	4
10/07/2021	12:33:01 pm	4																								74	3	88	4	80	4	71	4
10/07/2021	12:33:21 pm	4																								75	3	88	4	80	4	70	4
10/07/2021	12:33:41 pm	4																								74	3	88	4	79	4	71	4
10/07/2021	12:34:01 pm	4																								73	3	88	4	79	4	71	4
10/07/2021	12:34:21 pm	4																								72	3	88	4	79	4	71	4
10/07/2021	12:34:41 pm	4																								72	3	88	4	79	4	71	4
10/07/2021	12:35:01 pm	4																								71	3	87	4	79	4	71	4
10/07/2021	12:35:21 pm	4																								71	3	86	4	79	4	71	4
10/07/2021	12:35:41 pm	4																								71	3	86	4	78	4	71	4
10/07/2021	12:36:01 pm	4																								71	3	87	4	79	4	72	4
10/07/2021	12:36:21 pm	4																								71	3	87	4	79	4	71	4
10/07/2021	12:36:41 pm	4																								71	3	86	4	79	4	72	4
10/07/2021	12:37:01 pm	4																								71	3	87	4	79	4	72	4
10/07/2021	12:37:21 pm	4																								71	3	86	4	79	4	72	4
10/07/2021	12:37:41 pm	4																								71	3	86	4	78	4	73	4
10/07/2021	12:38:01 pm	4																								70	3	85	4	78	4	73	4
10/07/2021	12:38:21 pm	4																								71	3	86	4	79	4	72	4
10/07/2021	12:38:41 pm	4																								70	3	85	4	79	4	73	4
10/07/2021	12:39:01 pm	4																								70	3	86	4	79	4	72	4
10/07/2021	12:39:21 pm	4																								70	3	86	4	79	4	72	4
10/07/2021	12:39:41 pm	4																								70	3	85	4	79	4	72	4
10/07/2021	12:40:01 pm	4																								70	3	85	4	78	4	73	4
10/07/2021	12:40:21 pm	4																								71	3	85	4	79	4	73	4
10/07/2021	12:40:41 pm	4																								71	3	86	4	79	4	73	4
10/07/2021	12:41:01 pm	4																								71	3	85	4	80	4	73	4
10/07/2021	12:41:21 pm	4																								71	3	86	4	80	4	73	4
10/07/2021	12:41:41 pm	4																								71	3	85	4	80	4	73	4
10/07/2021	12:42:01 pm	4																								71	3	85	4	80	4	73	4
10/07/2021	12:42:21 pm	4																								70	3	85	4	79	4	73	4
10/07/2021	12:42:41 pm	4																								71	3	85	4	80	4	73	4
10/07/2021	12:43:01 pm	4																								71	3	85	4	80	4	73	4
10/07/2021	12:43:21 pm	4																								71	3	85	4	80	4	73	4
10/07/2021	12:43:41 pm	4																								71	3	86	4	80	4	73	4
10/07/2021	12:44:01 pm	4																								71	3	86	4	80	4	73	4
10/07/2021	12:44:21 pm	4																								71	3	87	4	80	4	73	4
10/07/2021	12:44:41 pm	4																								71	3	87	4	80	4	72	4
10/07/2021	12:45:01 pm	4																								71	3	87	4	80	4	73	4
10/07/2021	12:45:21 pm	4																								71	3	87	4	80	4	73	4
10/07/2021	12:45:41 pm	4																								72	3	88	4	81	4	73	4
10/07/2021	12:46:01 pm	4																								72	3	88	4	81	4	74	4
10/07/2021	12:46:21 pm	4																								71	3	88	4	81	4	73	4
10/07/2021	12:46:41 pm	4																								72	3	88	4	81	4	74	4
10/07/2021	12:47:01 pm	4																								72	3	88	4	80	4	74	4
10/07/2021	12:47:21 pm	4																								72	3	88	4	81	4	73	4
10/07/2021	12:47:41 pm	4																								72	3	88	4	82	4	73	4
10/07/2021	12:48:01 pm	4																								72	3	88	4	81	4	73	4
10/07/2021	12:48:21 pm	4																								72	3	88	4	81	4	74	4
10/07/2021	12:48:41 pm	4																								73	3	88	4	81	4	74	4
10/07/2021	12:49:01 pm	4																								80	3	89	4	79	4	74	4
10/07/2021	12:49:21 pm	4																								73	3	88	4	77	4	74	4
10/07/2021	12:49:41 pm	4																								73	3	88	4	77	4	74	4
10/07/2021	12:50:01 pm	4																								73	3	89	4	77	4	75	4
10/07/2021	12:50:21 pm	4																								73	3	88	4	77	4	74	4
10/07/2021	12:50:41 pm	4																								73	3	89	4	78	4	75	4
10/07/2021	12:51:01 pm	4																								73	3	89	4	77	4	75	4
10/07/2021	12:51:21 pm	4																								73	3	89	4	78	4	75	4
10/07/2021	12:51:41 pm	4																								73	3	89	4	77	4	75	4
10/07/2021	12:52:01 pm	4																								75	3	89	4	81	4	75	4
10/07/2021	12:52:21 pm	4																								72	3	89	4	84	4	75	4
10/07/2021	12:52:41 pm	4																								71	3	89	4	84	4	76	4
10/07/2021	12:53:01 pm	4																								71	3	89	4	84	4	76	4
10/07/2021	12:53:21 pm	4																								69	3	89	4	84	4	74	4
10/07/2021	12:53:41 pm	4																								70	3	89	4	83	4	75	4
10/07/2021	12:54:01 pm	4																								70	3	89	4	83	4	76	4
10/07/2021	12:54:21 pm	4																								70	3	89	4	84	4	75	4
10/07/2021	12:54:41 pm	4																								70	3	89	4	83	4	76	4
10/07/2021	12:55:01 pm	4																								70	3	89	4	83	4	75	4
10/07/2021	12:55:21 pm	4																								73	3	89	4	85	4	76	4
10/07/2021	12:55:41 pm	4																								77	3	89	4	86	4	77	4
10/07/2021	12:56:01 pm	4																								77	3	89	4	85	4	77	4
10/07/2021	12:56:21 pm	4																								78	3	89	4	84	4	77	4
10/07/2021	12:56:41 pm	4																								78	3	90	4	83	4	76	4
10/07/2021	12:57:01 pm	4																								79	3	89	4	83	4	76	4
10/07/2021	12:57:21 pm	4																								78	3	90	4	85	4	76	4
10/07/2021	12:57:41 pm	4																								78	3	90	4	87	4	76	4
10/07/2021	12:58:01 pm	4																								78	3	90	4	87	4	75	4
10/07/2021	12:58:21 pm	4																								78	3	90	4	85	4	76	4
10/07/2021	12:58:41 pm	4																								77	3	90	4	86	4	75	4
10/07/2021	12:59:01 pm	4																								78	3	90	4	87	4	76	4
10/07/2021	12:59:21 pm	4																								79	3	90	4	87	4	76	4
10/07/2021	12:59:41 pm	4																								79	3	90	4	87	4	76	4
10/07/2021	1:00:01 pm	4																								79	3	91	4	88	4	76	4
10/07/2021	1:00:21 pm	4																								78	3	91	4	89	4	76	4
10/07/2021	1:00:41 pm	4																								78	3	90	4	88	4	76	4
10/07/2021	1:01:01 pm	4																								77	3	90	4	88	4	77	4
10/07/2021	1:01:21 pm	4																								78	3	90	4	88	4	76	4
10/07/2021	1:01:41 pm	4																								79	3	90	4	88	4	77	4
10/07/2021	1:02:01 pm	4																								79	3	90	4	88	4	78	4
10/07/2021	1:02:21 pm	4																								78	3	90	4	88	4	77	4
10/07/2021	1:02:41 pm	4																								78	3	90	4	89	4	78	4
10/07/2021	1:03:01 pm	4																								78	3	90	4	88	4	79	4
10/07/2021	1:03:21 pm	4																								78	3	90	4	87	4	79	4
10/07/2021	1:03:41 pm	4																								78	3	90	4	88	4	78	4
10/07/2021	1:04:01 pm	4																								78	3	90	4	88	4	77	4
10/07/2021	1:04:21 pm	4																								77	3	90	4	88	4	77	4
10/07/2021	1:04:41 pm	4																								77	3	90	4	88	4	77	4
10/07/2021	1:05:01 pm	4																								78	3	90	4	88	4	76	4
10/07/2021	1:05:21 pm	4																								77	3	90	4	88	4	75	4
10/07/2021	1:05:41 pm	4																								77	3	90	4	87	4	76	4
10/07/2021	1:06:01 pm	4																								77	3	90	4	88	4	75	4
10/07/2021	1:06:21 pm	4																								77	3	90	4	87	4	75	4
10/07/2021	1:06:41 pm	4																								76	3	89	4	88	4	74	4
10/07/2021	1:07:01 pm	4																								76	3	89	4	87	4	76	4
10/07/2021	1:07:21 pm	4																								75	3	89	4	86	4	74	4
10/07/2021	1:07:41 pm	4																								74	3	89	4	86	4	75	4
10/07/2021	1:08:01 pm	4																								75	3	89	4	86	4	75	4
10/07/2021	1:08:21 pm	4																								75	3	90	4	86	4	75	4
10/07/2021	1:08:41 pm	4																								75	3	89	4	87	4	74	4
10/07/2021	1:09:01 pm	4																								75	3	89	4	87	4	74	4
10/07/2021	1:09:21 pm	4																								75	3	89	4	86	4	74	4
10/07/2021	1:09:41 pm	4																								75	3	89	4	86	4	74	4
10/07/2021	1:10:01 pm	4																								75	3	89	4	87	4	74	4
10/07/2021	1:10:21 pm	4																								75	3	89	4	88	4	75	4
10/07/2021	1:10:41 pm	4																								76	3	89	4	87	4	75	4
10/07/2021	1:11:01 pm	4																								75	3	90	4	88	4	74	4
10/07/2021	1:11:21 pm	4																								73	3	89	4	86	4	73	4
10/07/2021	1:11:41 pm	4																								76	3	90	4	88	4	75	4
10/07/2021	1:12:01 pm	4																								76	3	90	4	88	4	74	4
10/07/2021	1:12:21 pm	4																								74	3	90	4	83	4	75	4
10/07/2021	1:12:41 pm	4																								73	3	90	4	80	4	75	4
10/07/2021	1:13:01 pm	4																								73	3	90	4	78	4	75	4
10/07/2021	1:13:21 pm	4																								73	3	89	4	77	4	75	4
10/07/2021	1:13:41 pm	4																								73	3	90	4	78	4	74	4
10/07/2021	1:14:01 pm	4																								73	3	90	4	77	4	75	4
10/07/2021	1:14:21 pm	4																								73	3	90	4	77	4	74	4
10/07/2021	1:14:41 pm	4																								80	3	90	4	80	4	74	4
10/07/2021	1:15:01 pm	4																								76	3	90	4	88	4	73	4
10/07/2021	1:15:21 pm	4																								75	3	90	4	89	4	73	4
10/07/2021	1:15:41 pm	4																								75	3	90	4	89	4	75	4
10/07/2021	1:16:01 pm	4																								76	3	90	4	89	4	75	4
10/07/2021	1:16:21 pm	4																								75	3	90	4	88	4	75	4
10/07/2021	1:16:41 pm	4																								76	3	90	4	88	4	76	4
10/07/2021	1:17:01 pm	4																								76	3	90	4	87	4	75	4
10/07/2021	1:17:21 pm	4																								76	3	90	4	87	4	75	4
10/07/2021	1:17:41 pm	4																								76	3	90	4	87	4	76	4
10/07/2021	1:18:01 pm	4																								76	3	90	4	87	4	76	4
10/07/2021	1:18:21 pm	4																								76	3	90	4	87	4	75	4
10/07/2021	1:18:41 pm	4																								76	3	90	4	87	4	76	4
10/07/2021	1:19:01 pm	4																								76	3	90	4	87	4	75	4
10/07/2021	1:19:21 pm	4																								76	3	90	4	87	4	75	4
10/07/2021	1:19:41 pm	4																								77	3	90	4	78	4	76	4
10/07/2021	1:20:01 pm	4																								77	3	90	4	78	4	76	4
10/07/2021	1:20:21 pm	4																								77	3	90	4	79	4	76	4
10/07/2021	1:20:41 pm	4																								77	3	91	4	79	4	76	4
10/07/2021	1:21:01 pm	4																								77	3	91	4	80	4	77	4
10/07/2021	1:21:21 pm	4																								77	3	90	4	80	4	77	4
10/07/2021	1:21:41 pm	4																								77	3	90	4	80	4	77	4
10/07/2021	1:22:01 pm	4																								77	3	90	4	80	4	77	4
10/07/2021	1:22:21 pm	4																								77	3	90	4	81	4	76	4
10/07/2021	1:22:41 pm	4																								77	3	90	4	81	4	76	4
10/07/2021	1:23:01 pm	4																								77	3	91	4	80	4	77	4
10/07/2021	1:23:21 pm	4																								77	3	91	4	79	4	77	4
10/07/2021	1:23:41 pm	4																								79	3	91	4	84	4	78	4
10/07/2021	1:24:01 pm	4																								78	3	91	4	90	4	78	4
10/07/2021	1:24:21 pm	4																								78	3	91	4	90	4	77	4
10/07/2021	1:24:41 pm	4																								78	3	91	4	90	4	77	4
10/07/2021	1:25:01 pm	4																								78	3	91	4	90	4	78	4
10/07/2021	1:25:21 pm	4																								78	3	91	4	90	4	78	4
10/07/2021	1:25:41 pm	4																								78	3	91	4	89	4	78	4
10/07/2021	1:26:01 pm	4																								78	3	91	4	89	4	78	4
10/07/2021	1:26:21 pm	4																								78	3	91	4	90	4	77	4
10/07/2021	1:26:41 pm	4																								78	3	91	4	89	4	77	4
10/07/2021	1:27:01 pm	4																								77	3	91	4	89	4	77	4
10/07/2021	1:27:21 pm	4																								77	3	91	4	88	4	77	4
10/07/2021	1:27:41 pm	4																								77	3	91	4	89	4	77	4
10/07/2021	1:28:01 pm	4																								79	3	91	4	89	4	77	4
10/07/2021	1:28:21 pm	4																								79	3	91	4	90	4	78	4
10/07/2021	1:28:41 pm	4																								80	3	91	4	90	4	78	4
10/07/2021	1:29:01 pm	4																								80	3	91	4	90	4	78	4
10/07/2021	1:29:21 pm	4																								80	3	91	4	90	4	78	4
10/07/2021	1:29:41 pm	4																								80	3	91	4	90	4	78	4
10/07/2021	1:30:01 pm	4																								80	3	91	4	90	4	78	4
10/07/2021	1:30:21 pm	4																								80	3	92	4	90	4	79	4
10/07/2021	1:30:41 pm	4																								80	3	92	4	90	4	78	4
10/07/2021	1:31:01 pm	4																								80	3	91	4	90	4	78	4
10/07/2021	1:31:21 pm	4																								80	3	91	4	90	4	78	4
10/07/2021	1:31:41 pm	4																								80	3	91	4	90	4	78	4
10/07/2021	1:32:01 pm	4																								80	3	91	4	90	4	78	4
10/07/2021	1:32:21 pm	4																								80	3	91	4	90	4	79	4
10/07/2021	1:32:41 pm	4																								80	3	91	4	90	4	80	4
10/07/2021	1:33:01 pm	4																								80	3	91	4	90	4	79	4
10/07/2021	1:33:21 pm	4																								80	3	91	4	90	4	79	4
10/07/2021	1:33:41 pm	4																								80	3	91	4	90	4	79	4
10/07/2021	1:34:01 pm	4																								80	3	91	4	90	4	79	4
10/07/2021	1:34:21 pm	4																								80	3	91	4	90	4	79	4
10/07/2021	1:34:41 pm	4																								80	3	91	4	90	4	79	4
10/07/2021	1:35:01 pm	4																								81	3	91	4	90	4	79	4
10/07/2021	1:35:21 pm	4																								82	3	91	4	89	4	80	4
10/07/2021	1:35:41 pm	4																								82	3	91	4	90	4	80	4
10/07/2021	1:36:01 pm	4																								82	3	91	4	90	4	79	4
10/07/2021	1:36:21 pm	4																								83	3	91	4	90	4	79	4
10/07/2021	1:36:41 pm	4																								83	3	91	4	90	4	80	4
10/07/2021	1:37:01 pm	4																								83	3	91	4	90	4	80	4
10/07/2021	1:37:21 pm	4																								83	3	91	4	90	4	80	4
10/07/2021	1:37:41 pm	4																								83	3	91	4	90	4	80	4
10/07/2021	1:38:01 pm	4																								83	3	91	4	90	4	80	4
10/07/2021	1:38:21 pm	4																								83	3	91	4	90	4	80	4
10/07/2021	1:38:41 pm	4																								83	3	91	4	90	4	80	4
10/07/2021	1:39:01 pm	4																								83	3	91	4	90	4	81	4
10/07/2021	1:39:21 pm	4																								84	3	91	4	90	4	81	4
10/07/2021	1:39:41 pm	4																								83	3	91	4	90	4	81	4
10/07/2021	1:40:01 pm	4																								83	3	91	4	90	4	80	4
10/07/2021	1:40:21 pm	4																								83	3	91	4	90	4	81	4
10/07/2021	1:40:41 pm	4																								83	3	91	4	90	4	81	4
10/07/2021	1:41:01 pm	4																								84	3	91	4	90	4	81	4

## Sheet: ID 5
Date	Time	Technology	CO	sCO	CI	sCI	SV	SVI	PR	SYSART	DIAART	MAP	SVR	SVRI	SVV	PRV	PPV	EDV	sEDV	EDVI	sEDVI	RVEF	sRVEF	ScvO₂/SvO₂	SQI	StO₂ A1	TPI A1	StO₂ A2	TPI A2	StO₂ B1	TPI B1	StO₂ B2	TPI B2
		1-F, 4-SG	L/min	L/min	L/min/m²	L/min/m²	mL/b	mL/b/m²	bpm	mmHg	mmHg	mmHg	dyne-s/cm⁵	dyne-s-m²/cm⁵	%		%	mL	mL	mL/m²	mL/m²	% EFU	% EFU	%		%		%		%		%
10/11/2021	8:44:13 am	4																									65535		65535		65535		65535
10/11/2021	8:44:33 am	4																									65535		65535		65535		65535
10/11/2021	8:44:53 am	4																									65535		65535		65535		65535
10/11/2021	8:45:13 am	4																									65535		65535		65535		65535
10/11/2021	8:45:33 am	4																									65535		65535		65535		65535
10/11/2021	8:45:53 am	4																									65535		65535		65535		65535
10/11/2021	8:46:13 am	4																									65535		65535		65535		65535
10/11/2021	8:46:33 am	4
10/11/2021	8:46:53 am	4
10/11/2021	8:47:13 am	4
10/11/2021	8:47:33 am	4
10/11/2021	8:47:53 am	4
10/11/2021	8:48:13 am	4
10/11/2021	8:48:33 am	4
10/11/2021	8:48:53 am	4
10/11/2021	8:49:13 am	4
10/11/2021	8:49:33 am	4
10/11/2021	8:49:53 am	4																								73	4	75	4	70	4	69	4
10/11/2021	8:50:13 am	4																								73	4	71	4	70	4	69	4
10/11/2021	8:50:33 am	4																								73	4	71	4	70	4	69	4
10/11/2021	8:50:53 am	4																								73	4	71	4	70	4	70	4
10/11/2021	8:51:13 am	4																								73	4	72	4	69	4	68	4
10/11/2021	8:51:33 am	4																								74	4	72	4	69	4	69	4
10/11/2021	8:51:53 am	4																								74	4	73	4	69	4	69	4
10/11/2021	8:52:13 am	4																								74	4	73	4	70	4	70	4
10/11/2021	8:52:33 am	4																								75	4	73	4	73	4	72	4
10/11/2021	8:52:53 am	4																								75	4	74	4	72	4	72	4
10/11/2021	8:53:13 am	4																								75	4	75	4	72	4	72	4
10/11/2021	8:53:33 am	4																								75	4	76	4	72	4	74	4
10/11/2021	8:53:53 am	4																								74	4	76	4	73	4	76	4
10/11/2021	8:54:13 am	4																								73	4	79	4	75	4	78	4
10/11/2021	8:54:33 am	4																								76	4	76	4	75	4	73	4
10/11/2021	8:54:53 am	4																								79	4	77	4	78	4	75	4
10/11/2021	8:55:13 am	4																								79	4	78	4	79	4	75	4
10/11/2021	8:55:33 am	4																								81	4	80	4	81	4	78	4
10/11/2021	8:55:53 am	4																								81	4	80	4	83	4	81	4
10/11/2021	8:56:13 am	4																								81	4	82	4	84	4	83	4
10/11/2021	8:56:33 am	4																								83	4	83	4	85	4	86	4
10/11/2021	8:56:53 am	4																								83	4	83	4	85	4	87	4
10/11/2021	8:57:13 am	4																								83	4	88	4	85	4	89	4
10/11/2021	8:57:33 am	4																								82	4	87	4	85	4	89	4
10/11/2021	8:57:53 am	4																								83	4	86	4	86	4	89	4
10/11/2021	8:58:13 am	4																								86	4	87	4	89	4	90	4
10/11/2021	8:58:33 am	4																								87	4	88	4	91	4	90	4
10/11/2021	8:58:53 am	4																								88	4	89	4	91	4	94	4
10/11/2021	8:59:13 am	4																								88	4	89	4	92	4	95	4
10/11/2021	8:59:33 am	4																								88	4	88	4	92	4	94	4
10/11/2021	8:59:53 am	4																								88	4	87	4	92	4	94	4
10/11/2021	9:00:13 am	4																								88	4	87	4	92	4	93	4
10/11/2021	9:00:33 am	4																								88	4	88	4	91	4	93	4
10/11/2021	9:00:53 am	4																								89	4	88	4	90	4	93	4
10/11/2021	9:01:13 am	4																								89	4	89	4	91	4	92	4
10/11/2021	9:01:33 am	4																								89	4	89	4	90	4	93	4
10/11/2021	9:01:53 am	4																								88	4	89	4	90	4	93	4
10/11/2021	9:02:13 am	4																								88	4	88	4	90	4	93	4
10/11/2021	9:02:33 am	4																								88	4	88	4	90	4	92	4
10/11/2021	9:02:53 am	4																								88	4	88	4	90	4	92	4
10/11/2021	9:03:13 am	4																								88	4	88	4	90	4	92	4
10/11/2021	9:03:33 am	4																								87	4	87	4	89	4	92	4
10/11/2021	9:03:53 am	4																								87	4	87	4	89	4	92	4
10/11/2021	9:04:13 am	4																								86	4	87	4	89	4	91	4
10/11/2021	9:04:33 am	4																								87	4	87	4	89	4	92	4
10/11/2021	9:04:53 am	4																								86	4	86	4	89	4	91	4
10/11/2021	9:05:13 am	4																								85	4	85	4	88	4	91	4
10/11/2021	9:05:33 am	4																								85	4	85	4	88	4	90	4
10/11/2021	9:05:53 am	4																								85	4	84	4	88	4	90	4
10/11/2021	9:06:13 am	4																								84	4	84	4	86	4	90	4
10/11/2021	9:06:33 am	4																								84	4	84	4	87	4	90	4
10/11/2021	9:06:53 am	4																								85	4	84	4	86	4	90	4
10/11/2021	9:07:13 am	4																								83	4	84	4	85	4	89	4
10/11/2021	9:07:33 am	4																								81	4	84	4	84	4	89	4
10/11/2021	9:07:53 am	4																								83	4	83	4	84	4	89	4
10/11/2021	9:08:13 am	4																								83	4	83	4	83	4	88	4
10/11/2021	9:08:33 am	4																								84	4	84	4	83	4	88	4
10/11/2021	9:08:53 am	4																								82	4	83	4	83	4	88	4
10/11/2021	9:09:13 am	4																								84	4	84	4	83	4	88	4
10/11/2021	9:09:33 am	4																								84	4	84	4	82	4	87	4
10/11/2021	9:09:53 am	4																								83	4	83	4	81	4	86	4
10/11/2021	9:10:13 am	4																								83	4	83	4	81	4	86	4
10/11/2021	9:10:33 am	4																								83	4	83	4	80	4	85	4
10/11/2021	9:10:53 am	4																								83	4	83	4	80	4	84	4
10/11/2021	9:11:13 am	4																								82	4	82	4	79	4	84	4
10/11/2021	9:11:33 am	4																								81	4	82	4	78	4	83	4
10/11/2021	9:11:53 am	4																								82	4	82	4	82	4	87	4
10/11/2021	9:12:13 am	4																								82	4	83	4	88	4	89	4
10/11/2021	9:12:33 am	4																								83	4	83	4	88	4	89	4
10/11/2021	9:12:53 am	4																								81	4	82	4	87	4	89	4
10/11/2021	9:13:13 am	4																								82	4	83	4	88	4	90	4
10/11/2021	9:13:33 am	4																								83	4	83	4	87	4	89	4
10/11/2021	9:13:53 am	4																								81	4	82	4	85	4	89	4
10/11/2021	9:14:13 am	4																								79	4	81	4	83	4	88	4
10/11/2021	9:14:33 am	4																								79	4	80	4	82	4	88	4
10/11/2021	9:14:53 am	4																								79	4	80	4	81	4	88	4
10/11/2021	9:15:13 am	4																								79	4	80	4	80	4	87	4
10/11/2021	9:15:33 am	4																								78	4	79	4	81	4	87	4
10/11/2021	9:15:53 am	4																								78	4	79	4	80	4	88	4
10/11/2021	9:16:13 am	4																								79	4	80	4	81	4	88	4
10/11/2021	9:16:33 am	4																								79	4	80	4	81	4	88	4
10/11/2021	9:16:53 am	4																								80	4	81	4	81	4	87	4
10/11/2021	9:17:13 am	4																								80	4	81	4	81	4	88	4
10/11/2021	9:17:33 am	4																								80	4	80	4	81	4	88	4
10/11/2021	9:17:53 am	4																								81	4	82	4	81	4	88	4
10/11/2021	9:18:13 am	4																								81	4	82	4	81	4	87	4
10/11/2021	9:18:33 am	4																								81	4	82	4	81	4	86	4
10/11/2021	9:18:53 am	4																								80	4	81	4	80	4	87	4
10/11/2021	9:19:13 am	4																								79	4	81	4	80	4	85	4
10/11/2021	9:19:33 am	4																								79	4	81	4	80	4	85	4
10/11/2021	9:19:53 am	4																								80	4	81	4	80	4	85	4
10/11/2021	9:20:13 am	4																								81	4	82	4	80	4	85	4
10/11/2021	9:20:33 am	4																								81	4	81	4	79	4	85	4
10/11/2021	9:20:53 am	4																								78	4	80	4	79	4	82	4
10/11/2021	9:21:13 am	4																								80	4	81	4	78	4	81	4
10/11/2021	9:21:33 am	4																								76	4	79	4	77	4	80	4
10/11/2021	9:21:53 am	4																								77	4	78	4	77	4	80	4
10/11/2021	9:22:13 am	4																								78	4	78	4	77	4	80	4
10/11/2021	9:22:33 am	4																								77	4	78	4	77	4	80	4
10/11/2021	9:22:53 am	4																								79	4	78	4	78	4	81	4
10/11/2021	9:23:13 am	4																								77	4	80	4	82	4	77	4
10/11/2021	9:23:33 am	4																								81	4	72	4	84	4	81	4
10/11/2021	9:23:53 am	4																								75	4	81	4	75	4	83	4
10/11/2021	9:24:13 am	4																								76	4	77	4	80	4	81	4
10/11/2021	9:24:33 am	4																								78	4	74	4	79	4	80	4
10/11/2021	9:24:53 am	4																								74	4	79	4	79	4	78	4
10/11/2021	9:25:13 am	4																								75	4	76	4	79	4	75	4
10/11/2021	9:25:33 am	4																								77	4	72	4	75	4	77	4
10/11/2021	9:25:53 am	4																								72	4	78	4	76	4	79	4
10/11/2021	9:26:13 am	4																								75	4	74	4	75	4	75	4
10/11/2021	9:26:33 am	4																								78	4	74	4	81	4	71	4
10/11/2021	9:26:53 am	4																								74	4	75	4	75	4	76	4
10/11/2021	9:27:13 am	4																								75	4	73	4	80	4	78	4
10/11/2021	9:27:33 am	4																								77	4	75	4	72	4	77	4
10/11/2021	9:27:53 am	4																								73	4	76	4	79	4	79	4
10/11/2021	9:28:13 am	4																								75	4	76	4	76	4	80	4
10/11/2021	9:28:33 am	4																								77	4	74	4	79	4	79	4
10/11/2021	9:28:53 am	4																								74	4	75	4	74	4	77	4
10/11/2021	9:29:13 am	4																								75	4	76	4	75	4	78	4
10/11/2021	9:29:33 am	4																								75	4	73	4	77	4	79	4
10/11/2021	9:29:53 am	4																								75	4	75	4	76	4	77	4
10/11/2021	9:30:13 am	4																								75	4	75	4	77	4	76	4
10/11/2021	9:30:33 am	4																								75	4	75	4	77	4	74	4
10/11/2021	9:30:53 am	4																								74	4	75	4	77	4	74	4
10/11/2021	9:31:13 am	4																								74	4	77	4	77	4	74	4
10/11/2021	9:31:33 am	4																								79	4	76	4	76	4	73	4
10/11/2021	9:31:53 am	4																								70	4	84	4	80	4	73	4
10/11/2021	9:32:13 am	4																								76	4	75	4	68	4	68	4
10/11/2021	9:32:33 am	4																								78	4	76	4	68	4	68	4
10/11/2021	9:32:53 am	4																								69	4	80	4	85	4	78	4
10/11/2021	9:33:13 am	4																								75	4	74	4	86	4	71	4
10/11/2021	9:33:33 am	4																								72	4	73	4	86	4	71	4
10/11/2021	9:33:53 am	4																								80	4	70	4	86	4	64	4
10/11/2021	9:34:13 am	4																								88	4	62	4	86	4	63	4
10/11/2021	9:34:33 am	4																								75	4	72	4	86	4	70	4
10/11/2021	9:34:53 am	4																								71	4	75	4	86	4	68	4
10/11/2021	9:35:13 am	4																								80	4	70	4	82	4	67	4
10/11/2021	9:35:33 am	4																								77	4	72	4	82	4	66	4
10/11/2021	9:35:53 am	4																								66	4	79	4	82	4	65	4
10/11/2021	9:36:13 am	4																								73	4	72	4	82	4	67	4
10/11/2021	9:36:33 am	4																								78	4	72	4	82	4	67	4
10/11/2021	9:36:53 am	4																								72	4	74	4	82	4	67	4
10/11/2021	9:37:13 am	4																								74	4	69	4	81	4	66	4
10/11/2021	9:37:33 am	4																								71	4	72	4	75	4	67	4
10/11/2021	9:37:53 am	4																								71	4	77	4	81	4	71	4
10/11/2021	9:38:13 am	4																								78	4	70	4	82	4	62	4
10/11/2021	9:38:33 am	4																								82	4	66	4	70	4	63	4
10/11/2021	9:38:53 am	4																								69	4	72	4	70	4	66	4
10/11/2021	9:39:13 am	4																								67	4	76	4	80	4	63	4
10/11/2021	9:39:33 am	4																								73	4	72	4	76	4	71	4
10/11/2021	9:39:53 am	4																								73	4	71	4	74	4	71	4
10/11/2021	9:40:13 am	4																								73	4	73	4	74	4	71	4
10/11/2021	9:40:33 am	4																								73	4	72	4	74	4	70	4
10/11/2021	9:40:53 am	4																								73	4	72	4	74	4	69	4
10/11/2021	9:41:13 am	4																								73	4	72	4	73	4	68	4
10/11/2021	9:41:33 am	4																								72	4	72	4	74	4	66	4
10/11/2021	9:41:53 am	4																								73	4	74	4	74	4	65	4
10/11/2021	9:42:13 am	4																								73	4	72	4	74	4	64	4
10/11/2021	9:42:33 am	4																								73	4	73	4	74	4	64	4
10/11/2021	9:42:53 am	4																								73	4	73	4	75	4	64	4
10/11/2021	9:43:13 am	4																								73	4	72	4	74	4	63	4
10/11/2021	9:43:33 am	4																								73	4	73	4	74	4	63	4
10/11/2021	9:43:53 am	4																								73	4	74	4	74	4	63	4
10/11/2021	9:44:13 am	4																								73	4	73	4	73	4	61	4
10/11/2021	9:44:33 am	4																								74	4	74	4	74	4	63	4
10/11/2021	9:44:53 am	4																								74	4	73	4	74	4	62	4
10/11/2021	9:45:13 am	4																								73	4	75	4	75	4	62	4
10/11/2021	9:45:33 am	4																								74	4	76	4	77	4	68	4
10/11/2021	9:45:53 am	4																								74	4	74	4	79	4	76	4
10/11/2021	9:46:13 am	4																								74	4	74	4	79	4	85	4
10/11/2021	9:46:33 am	4																								74	4	73	4	81	4	88	4
10/11/2021	9:46:53 am	4																								75	4	72	4	81	4	83	4
10/11/2021	9:47:13 am	4																								75	4	71	4	82	4	80	4
10/11/2021	9:47:33 am	4																								74	4	71	4	80	4	78	4
10/11/2021	9:47:53 am	4																								73	4	72	4	79	4	74	4
10/11/2021	9:48:13 am	4																								72	4	72	4	79	4	74	4
10/11/2021	9:48:33 am	4																								73	4	71	4	79	4	73	4
10/11/2021	9:48:53 am	4																								73	4	71	4	79	4	73	4
10/11/2021	9:49:13 am	4																								73	4	72	4	79	4	72	4
10/11/2021	9:49:33 am	4																								72	4	71	4	78	4	72	4
10/11/2021	9:49:53 am	4																								72	4	70	4	77	4	71	4
10/11/2021	9:50:13 am	4																								71	4	70	4	77	4	69	4
10/11/2021	9:50:33 am	4																								71	4	70	4	76	4	69	4
10/11/2021	9:50:53 am	4																								71	4	70	4	76	4	69	4
10/11/2021	9:51:13 am	4																								71	4	69	4	75	4	68	4
10/11/2021	9:51:33 am	4																								71	4	70	4	75	4	67	4
10/11/2021	9:51:53 am	4																								71	4	70	4	74	4	67	4
10/11/2021	9:52:13 am	4																								71	4	69	4	75	4	67	4
10/11/2021	9:52:33 am	4																								71	4	70	4	74	4	67	4
10/11/2021	9:52:53 am	4																								71	4	69	4	74	4	66	4
10/11/2021	9:53:13 am	4																								71	4	70	4	74	4	68	4
10/11/2021	9:53:33 am	4																								72	4	70	4	74	4	67	4
10/11/2021	9:53:53 am	4																								72	4	70	4	75	4	68	4
10/11/2021	9:54:13 am	4																								72	4	70	4	75	4	68	4
10/11/2021	9:54:33 am	4																								73	4	71	4	76	4	69	4
10/11/2021	9:54:53 am	4																								73	4	71	4	76	4	69	4
10/11/2021	9:55:13 am	4																								72	4	71	4	76	4	69	4
10/11/2021	9:55:33 am	4																								73	4	71	4	76	4	70	4
10/11/2021	9:55:53 am	4																								73	4	72	4	77	4	70	4
10/11/2021	9:56:13 am	4																								73	4	72	4	77	4	70	4
10/11/2021	9:56:33 am	4																								73	4	72	4	77	4	71	4
10/11/2021	9:56:53 am	4																								74	4	72	4	79	4	72	4
10/11/2021	9:57:13 am	4																								74	4	72	4	79	4	72	4
10/11/2021	9:57:33 am	4																								73	4	72	4	78	4	72	4
10/11/2021	9:57:53 am	4																								73	4	72	4	78	4	72	4
10/11/2021	9:58:13 am	4																								73	4	72	4	77	4	72	4
10/11/2021	9:58:33 am	4																								73	4	72	4	77	4	72	4
10/11/2021	9:58:53 am	4																								73	4	72	4	77	4	72	4
10/11/2021	9:59:13 am	4																								73	4	72	4	77	4	72	4
10/11/2021	9:59:33 am	4																								73	4	72	4	77	4	71	4
10/11/2021	9:59:53 am	4																								73	4	72	4	77	4	71	4
10/11/2021	10:00:13 am	4																								73	4	72	4	78	4	70	4
10/11/2021	10:00:33 am	4																								73	4	72	4	77	4	71	4
10/11/2021	10:00:53 am	4																								73	4	72	4	77	4	70	4
10/11/2021	10:01:13 am	4																								73	4	72	4	77	4	70	4
10/11/2021	10:01:33 am	4																								73	4	72	4	77	4	70	4
10/11/2021	10:01:53 am	4																								73	4	72	4	76	4	70	4
10/11/2021	10:02:13 am	4																								72	4	72	4	76	4	69	4
10/11/2021	10:02:33 am	4																								73	4	72	4	76	4	70	4
10/11/2021	10:02:53 am	4																								73	4	72	4	76	4	68	4
10/11/2021	10:03:13 am	4																								72	4	72	4	75	4	68	4
10/11/2021	10:03:33 am	4																								72	4	71	4	75	4	69	4
10/11/2021	10:03:53 am	4																								72	4	71	4	75	4	68	4
10/11/2021	10:04:13 am	4																								72	4	71	4	75	4	68	4
10/11/2021	10:04:33 am	4																								72	4	71	4	75	4	67	4
10/11/2021	10:04:53 am	4																								72	4	71	4	75	4	68	4
10/11/2021	10:05:13 am	4																								72	4	71	4	75	4	67	4
10/11/2021	10:05:33 am	4																								72	4	71	4	75	4	66	4
10/11/2021	10:05:53 am	4																								72	4	71	4	75	4	67	4
10/11/2021	10:06:13 am	4																								72	4	71	4	75	4	66	4
10/11/2021	10:06:33 am	4																								71	4	71	4	74	4	66	4
10/11/2021	10:06:53 am	4																								71	4	71	4	75	4	66	4
10/11/2021	10:07:13 am	4																								71	4	71	4	74	4	66	4
10/11/2021	10:07:33 am	4																								71	4	71	4	74	4	66	4
10/11/2021	10:07:53 am	4																								71	4	71	4	74	4	66	4
10/11/2021	10:08:13 am	4																								71	4	71	4	74	4	65	4
10/11/2021	10:08:33 am	4																								71	4	71	4	73	4	65	4
10/11/2021	10:08:53 am	4																								71	4	70	4	74	4	64	4
10/11/2021	10:09:13 am	4																								71	4	70	4	73	4	64	4
10/11/2021	10:09:33 am	4																								71	4	70	4	74	4	64	4
10/11/2021	10:09:53 am	4																								71	4	70	4	73	4	63	4
10/11/2021	10:10:13 am	4																								71	4	70	4	73	4	63	4
10/11/2021	10:10:33 am	4																								71	4	70	4	73	4	63	4
10/11/2021	10:10:53 am	4																								70	4	70	4	73	4	63	4
10/11/2021	10:11:13 am	4																								71	4	70	4	73	4	63	4
10/11/2021	10:11:33 am	4																								72	4	71	4	74	4	63	4
10/11/2021	10:11:53 am	4																								72	4	71	4	75	4	64	4
10/11/2021	10:12:13 am	4																								71	4	70	4	75	4	64	4
10/11/2021	10:12:33 am	4																								71	4	71	4	75	4	64	4
10/11/2021	10:12:53 am	4																								71	4	70	4	75	4	64	4
10/11/2021	10:13:13 am	4																								71	4	70	4	75	4	64	4
10/11/2021	10:13:33 am	4																								71	4	70	4	75	4	65	4
10/11/2021	10:13:53 am	4																								71	4	70	4	76	4	65	4
10/11/2021	10:14:13 am	4																								70	4	69	4	76	4	65	4
10/11/2021	10:14:33 am	4																								70	4	68	4	76	4	64	4
10/11/2021	10:14:53 am	4																								69	4	68	4	75	4	65	4
10/11/2021	10:15:13 am	4																								69	4	67	4	74	4	66	4
10/11/2021	10:15:33 am	4																								68	4	67	4	73	4	66	4
10/11/2021	10:15:53 am	4																								68	4	66	4	72	4	65	4
10/11/2021	10:16:13 am	4																								67	4	67	4	72	4	65	4
10/11/2021	10:16:33 am	4																								67	4	67	4	71	4	66	4
10/11/2021	10:16:53 am	4																								68	4	67	4	71	4	65	4
10/11/2021	10:17:13 am	4																								68	4	67	4	70	4	65	4
10/11/2021	10:17:33 am	4																								69	4	68	4	70	4	66	4
10/11/2021	10:17:53 am	4																								69	4	68	4	70	4	67	4
10/11/2021	10:18:13 am	4																								70	4	68	4	72	4	69	4
10/11/2021	10:18:33 am	4																								70	4	69	4	72	4	70	4
10/11/2021	10:18:53 am	4																								70	4	69	4	73	4	71	4
10/11/2021	10:19:13 am	4																								71	4	69	4	74	4	73	4
10/11/2021	10:19:33 am	4																								71	4	70	4	74	4	74	4
10/11/2021	10:19:53 am	4																								71	4	70	4	74	4	73	4
10/11/2021	10:20:13 am	4																								71	4	70	4	74	4	74	4
10/11/2021	10:20:33 am	4																								71	4	70	4	74	4	73	4
10/11/2021	10:20:53 am	4																								71	4	70	4	74	4	73	4
10/11/2021	10:21:13 am	4																								71	4	70	4	73	4	72	4
10/11/2021	10:21:33 am	4																								71	4	70	4	73	4	72	4
10/11/2021	10:21:53 am	4																								71	4	70	4	73	4	72	4
10/11/2021	10:22:13 am	4																								71	4	70	4	73	4	73	4
10/11/2021	10:22:33 am	4																								71	4	70	4	73	4	73	4
10/11/2021	10:22:53 am	4																								71	4	71	4	73	4	72	4
10/11/2021	10:23:13 am	4																								71	4	71	4	73	4	72	4
10/11/2021	10:23:33 am	4																								71	4	70	4	74	4	71	4
10/11/2021	10:23:53 am	4																								71	4	70	4	73	4	71	4
10/11/2021	10:24:13 am	4																								71	4	71	4	73	4	71	4
10/11/2021	10:24:33 am	4																								71	4	71	4	74	4	71	4
10/11/2021	10:24:53 am	4																								71	4	71	4	73	4	71	4
10/11/2021	10:25:13 am	4																								71	4	71	4	73	4	71	4
10/11/2021	10:25:33 am	4																								71	4	71	4	73	4	71	4
10/11/2021	10:25:53 am	4																								71	4	70	4	73	4	70	4
10/11/2021	10:26:13 am	4																								71	4	71	4	73	4	70	4
10/11/2021	10:26:33 am	4																								71	4	71	4	73	4	70	4
10/11/2021	10:26:53 am	4																								71	4	71	4	73	4	70	4
10/11/2021	10:27:13 am	4																								71	4	71	4	73	4	70	4
10/11/2021	10:27:33 am	4																								71	4	70	4	74	4	69	4
10/11/2021	10:27:53 am	4																								71	4	70	4	74	4	70	4
10/11/2021	10:28:13 am	4																								71	4	70	4	74	4	69	4
10/11/2021	10:28:33 am	4																								71	4	70	4	74	4	69	4
10/11/2021	10:28:53 am	4																								71	4	71	4	74	4	70	4
10/11/2021	10:29:13 am	4																								71	4	70	4	74	4	70	4
10/11/2021	10:29:33 am	4																								71	4	70	4	74	4	70	4
10/11/2021	10:29:53 am	4																								71	4	70	4	74	4	70	4
10/11/2021	10:30:13 am	4																								71	4	70	4	74	4	69	4
10/11/2021	10:30:33 am	4																								71	4	70	4	74	4	69	4
10/11/2021	10:30:53 am	4																								71	4	70	4	74	4	69	4
10/11/2021	10:31:13 am	4																								70	4	70	4	74	4	69	4
10/11/2021	10:31:33 am	4																								71	4	70	4	74	4	69	4
10/11/2021	10:31:53 am	4																								71	4	70	4	74	4	69	4
10/11/2021	10:32:13 am	4																								71	4	71	4	74	4	70	4
10/11/2021	10:32:33 am	4																								71	4	71	4	74	4	70	4
10/11/2021	10:32:53 am	4																								71	4	71	4	75	4	70	4
10/11/2021	10:33:13 am	4																								72	4	71	4	75	4	71	4
10/11/2021	10:33:33 am	4																								71	4	71	4	75	4	71	4
10/11/2021	10:33:53 am	4																								71	4	71	4	75	4	72	4
10/11/2021	10:34:13 am	4																								72	4	71	4	75	4	71	4
10/11/2021	10:34:33 am	4																								71	4	71	4	75	4	71	4
10/11/2021	10:34:53 am	4																								71	4	71	4	74	4	71	4
10/11/2021	10:35:13 am	4																								72	4	71	4	74	4	71	4
10/11/2021	10:35:33 am	4																								72	4	71	4	75	4	71	4
10/11/2021	10:35:53 am	4																								73	4	71	4	76	4	72	4
10/11/2021	10:36:13 am	4																								73	4	71	4	77	4	72	4
10/11/2021	10:36:33 am	4																								72	4	71	4	77	4	71	4
10/11/2021	10:36:53 am	4																								71	4	71	4	77	4	72	4
10/11/2021	10:37:13 am	4																								71	4	70	4	76	4	71	4
10/11/2021	10:37:33 am	4																								71	4	70	4	75	4	72	4
10/11/2021	10:37:53 am	4																								70	4	69	4	74	4	71	4
10/11/2021	10:38:13 am	4																								71	4	69	4	73	4	71	4
10/11/2021	10:38:33 am	4																								71	4	69	4	74	4	73	4
10/11/2021	10:38:53 am	4																								71	4	70	4	75	4	75	4
10/11/2021	10:39:13 am	4																								71	4	70	4	76	4	76	4
10/11/2021	10:39:33 am	4																								71	4	70	4	76	4	79	4
10/11/2021	10:39:53 am	4																								71	4	70	4	76	4	79	4
10/11/2021	10:40:13 am	4																								71	4	71	4	76	4	80	4
10/11/2021	10:40:33 am	4																								72	4	71	4	76	4	81	4
10/11/2021	10:40:53 am	4																								72	4	71	4	76	4	81	4
10/11/2021	10:41:13 am	4																								72	4	71	4	76	4	82	4
10/11/2021	10:41:33 am	4																								72	4	72	4	77	4	82	4
10/11/2021	10:41:53 am	4																								72	4	72	4	77	4	81	4
10/11/2021	10:42:13 am	4																								73	4	72	4	77	4	82	4
10/11/2021	10:42:33 am	4																								73	4	72	4	78	4	82	4
10/11/2021	10:42:53 am	4																								73	4	72	4	78	4	82	4
10/11/2021	10:43:13 am	4																								73	4	72	4	77	4	81	4
10/11/2021	10:43:33 am	4																								73	4	72	4	78	4	80	4
10/11/2021	10:43:53 am	4																								73	4	71	4	79	4	79	4
10/11/2021	10:44:13 am	4																								73	4	71	4	79	4	78	4
10/11/2021	10:44:33 am	4																								72	4	70	4	79	4	76	4
10/11/2021	10:44:53 am	4																								71	4	69	4	78	4	75	4
10/11/2021	10:45:13 am	4																								70	4	68	4	77	4	73	4
10/11/2021	10:45:33 am	4																								70	4	68	4	76	4	73	4
10/11/2021	10:45:53 am	4																								70	4	68	4	76	4	72	4
10/11/2021	10:46:13 am	4																								69	4	68	4	76	4	72	4
10/11/2021	10:46:33 am	4																								70	4	68	4	76	4	73	4
10/11/2021	10:46:53 am	4																								70	4	68	4	76	4	74	4
10/11/2021	10:47:13 am	4																								71	4	69	4	76	4	75	4
10/11/2021	10:47:33 am	4																								71	4	69	4	76	4	76	4
10/11/2021	10:47:53 am	4																								71	4	70	4	76	4	76	4
10/11/2021	10:48:13 am	4																								71	4	70	4	76	4	77	4
10/11/2021	10:48:33 am	4																								72	4	70	4	76	4	78	4
10/11/2021	10:48:53 am	4																								72	4	70	4	76	4	77	4
10/11/2021	10:49:13 am	4																								72	4	71	4	76	4	78	4
10/11/2021	10:49:33 am	4																								72	4	70	4	76	4	78	4
10/11/2021	10:49:53 am	4																								73	4	71	4	76	4	77	4
10/11/2021	10:50:13 am	4																								73	4	71	4	76	4	77	4
10/11/2021	10:50:33 am	4																								73	4	71	4	76	4	77	4
10/11/2021	10:50:53 am	4																								73	4	71	4	75	4	78	4
10/11/2021	10:51:13 am	4																								73	4	71	4	76	4	77	4
10/11/2021	10:51:33 am	4																								73	4	71	4	76	4	78	4
10/11/2021	10:51:53 am	4																								74	4	71	4	77	4	77	4
10/11/2021	10:52:13 am	4																								74	4	71	4	78	4	77	4
10/11/2021	10:52:33 am	4																								74	4	72	4	78	4	77	4
10/11/2021	10:52:53 am	4																								73	4	71	4	78	4	76	4
10/11/2021	10:53:13 am	4																								73	4	71	4	78	4	75	4
10/11/2021	10:53:33 am	4																								73	4	70	4	77	4	74	4
10/11/2021	10:53:53 am	4																								72	4	69	4	77	4	74	4
10/11/2021	10:54:13 am	4																								71	4	69	4	76	4	73	4
10/11/2021	10:54:33 am	4																								71	4	68	4	75	4	71	4
10/11/2021	10:54:53 am	4																								70	4	67	4	74	4	70	4
10/11/2021	10:55:13 am	4																								70	4	67	4	73	4	69	4
10/11/2021	10:55:33 am	4																								69	4	67	4	73	4	69	4
10/11/2021	10:55:53 am	4																								69	4	67	4	73	4	69	4
10/11/2021	10:56:13 am	4																								69	4	67	4	72	4	69	4
10/11/2021	10:56:33 am	4																								70	4	67	4	73	4	70	4
10/11/2021	10:56:53 am	4																								70	4	68	4	74	4	70	4
10/11/2021	10:57:13 am	4																								69	4	67	4	74	4	71	4
10/11/2021	10:57:33 am	4																								69	4	67	4	74	4	71	4
10/11/2021	10:57:53 am	4																								69	4	67	4	75	4	71	4
10/11/2021	10:58:13 am	4																								69	4	67	4	75	4	72	4
10/11/2021	10:58:33 am	4																								69	4	67	4	74	4	71	4
10/11/2021	10:58:53 am	4																								69	4	67	4	73	4	72	4
10/11/2021	10:59:13 am	4																								69	4	67	4	73	4	73	4
10/11/2021	10:59:33 am	4																								70	4	67	4	73	4	72	4
10/11/2021	10:59:53 am	4																								70	4	68	4	73	4	73	4
10/11/2021	11:00:13 am	4																								71	4	68	4	73	4	73	4
10/11/2021	11:00:33 am	4																								71	4	68	4	73	4	73	4
10/11/2021	11:00:53 am	4																								71	4	68	4	73	4	74	4
10/11/2021	11:01:13 am	4																								71	4	68	4	73	4	72	4
10/11/2021	11:01:33 am	4																								71	4	68	4	73	4	71	4
10/11/2021	11:01:53 am	4																								71	4	67	4	73	4	70	4
10/11/2021	11:02:13 am	4																								71	4	67	4	74	4	71	4
10/11/2021	11:02:33 am	4																								70	4	67	4	74	4	70	4
10/11/2021	11:02:53 am	4																								70	4	67	4	74	4	71	4
10/11/2021	11:03:13 am	4																								70	4	68	4	73	4	71	4
10/11/2021	11:03:33 am	4																								71	4	68	4	73	4	71	4
10/11/2021	11:03:53 am	4																								71	4	68	4	73	4	72	4
10/11/2021	11:04:13 am	4																								71	4	68	4	72	4	72	4
10/11/2021	11:04:33 am	4																								71	4	68	4	72	4	72	4
10/11/2021	11:04:53 am	4																								71	4	69	4	72	4	71	4
10/11/2021	11:05:13 am	4																								71	4	69	4	72	4	71	4
10/11/2021	11:05:33 am	4																								72	4	69	4	72	4	72	4
10/11/2021	11:05:53 am	4																								72	4	69	4	73	4	71	4
10/11/2021	11:06:13 am	4																								72	4	69	4	73	4	70	4
10/11/2021	11:06:33 am	4																								72	4	68	4	74	4	70	4
10/11/2021	11:06:53 am	4																								71	4	68	4	74	4	70	4
10/11/2021	11:07:13 am	4																								72	4	68	4	74	4	71	4
10/11/2021	11:07:33 am	4																								71	4	68	4	74	4	71	4
10/11/2021	11:07:53 am	4																								71	4	69	4	74	4	71	4
10/11/2021	11:08:13 am	4																								72	4	69	4	73	4	72	4
10/11/2021	11:08:33 am	4																								72	4	69	4	74	4	73	4
10/11/2021	11:08:53 am	4																								73	4	69	4	74	4	73	4
10/11/2021	11:09:13 am	4																								73	4	70	4	73	4	74	4
10/11/2021	11:09:33 am	4																								74	4	70	4	74	4	74	4
10/11/2021	11:09:53 am	4																								74	4	70	4	74	4	74	4
10/11/2021	11:10:13 am	4																								74	4	70	4	74	4	74	4
10/11/2021	11:10:33 am	4																								74	4	71	4	75	4	75	4
10/11/2021	11:10:53 am	4																								74	4	71	4	75	4	75	4
10/11/2021	11:11:13 am	4																								74	4	71	4	75	4	75	4
10/11/2021	11:11:33 am	4																								74	4	71	4	76	4	75	4
10/11/2021	11:11:53 am	4																								75	4	71	4	75	4	75	4
10/11/2021	11:12:13 am	4																								75	4	71	4	75	4	75	4
10/11/2021	11:12:33 am	4																								75	4	71	4	76	4	75	4
10/11/2021	11:12:53 am	4																								75	4	71	4	76	4	75	4
10/11/2021	11:13:13 am	4																								75	4	71	4	76	4	75	4
10/11/2021	11:13:33 am	4																								75	4	71	4	76	4	75	4
10/11/2021	11:13:53 am	4																								75	4	72	4	76	4	75	4
10/11/2021	11:14:13 am	4																								75	4	71	4	76	4	75	4
10/11/2021	11:14:33 am	4																								75	4	72	4	76	4	75	4
10/11/2021	11:14:53 am	4																								75	4	71	4	76	4	75	4
10/11/2021	11:15:13 am	4																								75	4	71	4	76	4	74	4
10/11/2021	11:15:33 am	4																								75	4	71	4	77	4	75	4
10/11/2021	11:15:53 am	4																								75	4	72	4	77	4	74	4
10/11/2021	11:16:13 am	4																								75	4	71	4	77	4	75	4
10/11/2021	11:16:33 am	4																								75	4	72	4	77	4	75	4
10/11/2021	11:16:53 am	4																								75	4	72	4	77	4	75	4
10/11/2021	11:17:13 am	4																								75	4	72	4	77	4	76	4
10/11/2021	11:17:33 am	4																								75	4	72	4	77	4	76	4
10/11/2021	11:17:53 am	4																								75	4	72	4	78	4	76	4
10/11/2021	11:18:13 am	4																								75	4	72	4	77	4	76	4
10/11/2021	11:18:33 am	4																								75	4	72	4	77	4	76	4
10/11/2021	11:18:53 am	4																								75	4	72	4	77	4	76	4
10/11/2021	11:19:13 am	4																								75	4	73	4	77	4	77	4
10/11/2021	11:19:33 am	4																								75	4	72	4	77	4	76	4
10/11/2021	11:19:53 am	4																								76	4	72	4	78	4	76	4
10/11/2021	11:20:13 am	4																								76	4	72	4	78	4	76	4
10/11/2021	11:20:33 am	4																								76	4	72	4	79	4	76	4
10/11/2021	11:20:53 am	4																								76	4	72	4	79	4	77	4
10/11/2021	11:21:13 am	4																								75	4	72	4	78	4	75	4
10/11/2021	11:21:33 am	4																								75	4	72	4	78	4	75	4
10/11/2021	11:21:53 am	4																								75	4	71	4	77	4	75	4
10/11/2021	11:22:13 am	4																								74	4	71	4	77	4	74	4
10/11/2021	11:22:33 am	4																								74	4	71	4	77	4	74	4
10/11/2021	11:22:53 am	4																								75	4	71	4	76	4	73	4
10/11/2021	11:23:13 am	4																								75	4	71	4	76	4	74	4
10/11/2021	11:23:33 am	4																								74	4	71	4	76	4	73	4
10/11/2021	11:23:53 am	4																								75	4	71	4	76	4	73	4
10/11/2021	11:24:13 am	4																								74	4	71	4	76	4	73	4
10/11/2021	11:24:33 am	4																								74	4	71	4	76	4	73	4
10/11/2021	11:24:53 am	4																								75	4	72	4	76	4	74	4
10/11/2021	11:25:13 am	4																								75	4	71	4	76	4	74	4
10/11/2021	11:25:33 am	4																								75	4	71	4	75	4	73	4
10/11/2021	11:25:53 am	4																								75	4	71	4	75	4	73	4
10/11/2021	11:26:13 am	4																								75	4	71	4	76	4	74	4
10/11/2021	11:26:33 am	4																								74	4	71	4	75	4	73	4
10/11/2021	11:26:53 am	4																								74	4	72	4	75	4	73	4
10/11/2021	11:27:13 am	4																								75	4	72	4	76	4	73	4
10/11/2021	11:27:33 am	4																								75	4	72	4	75	4	73	4
10/11/2021	11:27:53 am	4																								74	4	72	4	75	4	74	4
10/11/2021	11:28:13 am	4																								75	4	72	4	75	4	73	4
10/11/2021	11:28:33 am	4																								75	4	71	4	75	4	73	4
10/11/2021	11:28:53 am	4																								75	4	72	4	76	4	72	4
10/11/2021	11:29:13 am	4																								74	4	73	4	75	4	73	4
10/11/2021	11:29:33 am	4																								75	4	71	4	76	4	72	4
10/11/2021	11:29:53 am	4																								75	4	72	4	75	4	72	4
10/11/2021	11:30:13 am	4																								74	4	72	4	75	4	72	4
10/11/2021	11:30:33 am	4																								75	4	71	4	75	4	72	4
10/11/2021	11:30:53 am	4																								75	4	71	4	75	4	72	4
10/11/2021	11:31:13 am	4																								75	4	71	4	76	4	72	4
10/11/2021	11:31:33 am	4																								74	4	71	4	76	4	72	4
10/11/2021	11:31:53 am	4																								74	4	71	4	75	4	72	4
10/11/2021	11:32:13 am	4																								73	4	71	4	75	4	71	4
10/11/2021	11:32:33 am	4																								73	4	70	4	75	4	71	4
10/11/2021	11:32:53 am	4																								74	4	71	4	75	4	71	4
10/11/2021	11:33:13 am	4																								74	4	71	4	76	4	72	4
10/11/2021	11:33:33 am	4																								74	4	70	4	77	4	71	4
10/11/2021	11:33:53 am	4																								73	4	69	4	77	4	71	4
10/11/2021	11:34:13 am	4																								73	4	69	4	76	4	71	4
10/11/2021	11:34:33 am	4																								72	4	69	4	77	4	70	4
10/11/2021	11:34:53 am	4																								72	4	70	4	75	4	70	4
10/11/2021	11:35:13 am	4																								72	4	69	4	73	4	69	4
10/11/2021	11:35:33 am	4																								72	4	70	4	68	4	66	4
10/11/2021	11:35:53 am	4																								73	4	69	4	62	4	61	4
10/11/2021	11:36:13 am	4																								72	4	69	4	66	4	63	4
10/11/2021	11:36:33 am	4																								72	4	69	4	66	4	63	4
10/11/2021	11:36:53 am	4																								71	4	69	4	82	4	63	4
10/11/2021	11:37:13 am	4																								71	4	69	4	82	4	73	4
10/11/2021	11:37:33 am	4																								71	4	69	4	69	4	75	4
10/11/2021	11:37:53 am	4																								71	4	69	4	65	4	67	4
10/11/2021	11:38:13 am	4																								72	4	69	4	67	4	68	4
10/11/2021	11:38:33 am	4																								71	4	69	4	93	4	80	4
10/11/2021	11:38:53 am	4																								72	4	70	4	93	4	71	4
10/11/2021	11:39:13 am	4																								72	4	70	4	72	4	69	4
10/11/2021	11:39:33 am	4																								72	4	70	4	72	4	69	4
10/11/2021	11:39:53 am	4																								73	4	71	4	72	4	69	4
10/11/2021	11:40:13 am	4																								74	4	71	4	72	4	69	4
10/11/2021	11:40:33 am	4																								74	4	71	4	72	4	74	4
10/11/2021	11:40:53 am	4																								74	4	71	4	72	4	74	4
10/11/2021	11:41:13 am	4																								74	4	72	4	72	4	74	4
10/11/2021	11:41:33 am	4																								74	4	72	4	72	4	74	4
10/11/2021	11:41:53 am	4																								74	4	72	4	72	4	74	4
10/11/2021	11:42:13 am	4																								75	4	72	4	72	4	76	4
10/11/2021	11:42:33 am	4																								75	4	72	4	72	4	67	4
10/11/2021	11:42:53 am	4																								73	4	71	4	72	4	67	4
10/11/2021	11:43:13 am	4																								75	4	72	4	77	4	67	4
10/11/2021	11:43:33 am	4																								75	4	72	4	76	4	67	4
10/11/2021	11:43:53 am	4																								74	4	72	4	76	4	67	4
10/11/2021	11:44:13 am	4																								74	4	72	4	76	4	67	4
10/11/2021	11:44:33 am	4																								75	4	72	4	76	4	67	4
10/11/2021	11:44:53 am	4																								74	4	72	4	76	4	67	4
10/11/2021	11:45:13 am	4																								75	4	72	4	76	4	67	4
10/11/2021	11:45:33 am	4																								75	4	72	4	76	4	68	4
10/11/2021	11:45:53 am	4																								74	4	72	4	75	4	73	4
10/11/2021	11:46:13 am	4																								75	4	72	4	76	4	74	4
10/11/2021	11:46:33 am	4																								75	4	72	4	76	4	74	4
10/11/2021	11:46:53 am	4																								74	4	72	4	76	4	74	4
10/11/2021	11:47:13 am	4																								74	4	72	4	76	4	73	4
10/11/2021	11:47:33 am	4																								74	4	71	4	75	4	73	4
10/11/2021	11:47:53 am	4																								74	4	71	4	75	4	73	4
10/11/2021	11:48:13 am	4																								74	4	71	4	76	4	73	4
10/11/2021	11:48:33 am	4																								74	4	71	4	77	4	73	4
10/11/2021	11:48:53 am	4																								75	4	72	4	78	4	74	4
10/11/2021	11:49:13 am	4																								75	4	72	4	79	4	75	4
10/11/2021	11:49:33 am	4																								75	4	72	4	79	4	76	4
10/11/2021	11:49:53 am	4																								75	4	72	4	79	4	76	4
10/11/2021	11:50:13 am	4																								75	4	73	4	79	4	76	4
10/11/2021	11:50:33 am	4																								75	4	72	4	79	4	76	4
10/11/2021	11:50:53 am	4																								76	4	72	4	79	4	76	4
10/11/2021	11:51:13 am	4																								76	4	72	4	79	4	76	4
10/11/2021	11:51:33 am	4																								76	4	72	4	79	4	76	4
10/11/2021	11:51:53 am	4																								76	4	72	4	80	4	77	4
10/11/2021	11:52:13 am	4																								76	4	72	4	80	4	77	4
10/11/2021	11:52:33 am	4																								76	4	72	4	79	4	76	4
10/11/2021	11:52:53 am	4																								76	4	73	4	80	4	77	4
10/11/2021	11:53:13 am	4																								77	4	73	4	80	4	76	4
10/11/2021	11:53:33 am	4																								76	4	73	4	80	4	76	4
10/11/2021	11:53:53 am	4																								76	4	72	4	80	4	76	4
10/11/2021	11:54:13 am	4																								76	4	73	4	80	4	76	4
10/11/2021	11:54:33 am	4																								76	4	73	4	80	4	76	4
10/11/2021	11:54:53 am	4																								76	4	72	4	80	4	77	4
10/11/2021	11:55:13 am	4																								76	4	73	4	80	4	77	4
10/11/2021	11:55:33 am	4																								76	4	73	4	79	4	76	4
10/11/2021	11:55:53 am	4																								76	4	73	4	80	4	77	4
10/11/2021	11:56:13 am	4																								76	4	73	4	80	4	76	4
10/11/2021	11:56:33 am	4																								77	4	73	4	80	4	77	4
10/11/2021	11:56:53 am	4																								77	4	73	4	80	4	77	4
10/11/2021	11:57:13 am	4																								77	4	73	4	80	4	77	4
10/11/2021	11:57:33 am	4																								77	4	74	4	80	4	77	4
10/11/2021	11:57:53 am	4																								77	4	74	4	80	4	77	4
10/11/2021	11:58:13 am	4																								77	4	73	4	80	4	78	4
10/11/2021	11:58:33 am	4																								76	4	73	4	79	4	78	4
10/11/2021	11:58:53 am	4																								78	4	73	4	80	4	79	4
10/11/2021	11:59:13 am	4																								77	4	74	4	80	4	77	4
10/11/2021	11:59:33 am	4																								77	4	73	4	79	4	77	4
10/11/2021	11:59:53 am	4																								78	4	72	4	79	4	79	4
10/11/2021	12:00:13 pm	4																								77	4	75	4	80	4	77	4
10/11/2021	12:00:33 pm	4																								76	4	75	4	80	4	78	4
10/11/2021	12:00:53 pm	4																								77	4	73	4	79	4	77	4
10/11/2021	12:01:13 pm	4																								77	4	73	4	79	4	78	4
10/11/2021	12:01:33 pm	4																								77	4	73	4	79	4	77	4
10/11/2021	12:01:53 pm	4																								77	4	73	4	79	4	77	4
10/11/2021	12:02:13 pm	4																								77	4	74	4	79	4	78	4
10/11/2021	12:02:33 pm	4																								77	4	73	4	79	4	78	4
10/11/2021	12:02:53 pm	4																								77	4	73	4	79	4	77	4
10/11/2021	12:03:13 pm	4																								77	4	73	4	79	4	77	4
10/11/2021	12:03:33 pm	4																								77	4	73	4	79	4	77	4

## Sheet: ID 6
Date	Time	Technology	CO	sCO	CI	sCI	SV	SVI	PR	SYSART	DIAART	MAP	SVR	SVRI	SVV	PRV	PPV	EDV	sEDV	EDVI	sEDVI	RVEF	sRVEF	ScvO₂/SvO₂	SQI	StO₂ A1	TPI A1	StO₂ A2	TPI A2	StO₂ B1	TPI B1	StO₂ B2	TPI B2
		1-F, 4-SG	L/min	L/min	L/min/m²	L/min/m²	mL/b	mL/b/m²	bpm	mmHg	mmHg	mmHg	dyne-s/cm⁵	dyne-s-m²/cm⁵	%		%	mL	mL	mL/m²	mL/m²	% EFU	% EFU	%		%		%		%		%
10/11/2021	12:51:19 pm	4																									65535		65535		65535		65535
10/11/2021	12:51:39 pm	4																								67	4	72	4	72	4	64	4
10/11/2021	12:51:59 pm	4																								68	4	71	4	72	4	64	4
10/11/2021	12:52:19 pm	4																								67	4	72	4	72	4	63	4
10/11/2021	12:52:39 pm	4																								67	4	72	4	72	4	63	4
10/11/2021	12:52:59 pm	4																								66	4	72	4	72	4	63	4
10/11/2021	12:53:19 pm	4																								66	4	72	4	72	4	63	4
10/11/2021	12:53:39 pm	4																								66	4	72	4	72	4	62	4
10/11/2021	12:53:59 pm	4																								66	4	72	4	72	4	63	4
10/11/2021	12:54:19 pm	4																								66	4	72	4	72	4	63	4
10/11/2021	12:54:39 pm	4																								66	4	72	4	72	4	63	4
10/11/2021	12:54:59 pm	4																								67	4	72	4	73	4	64	4
10/11/2021	12:55:19 pm	4																								68	4	73	4	74	4	66	4
10/11/2021	12:55:39 pm	4																								69	4	73	4	76	4	69	4
10/11/2021	12:55:59 pm	4																								70	4	74	4	78	4	71	4
10/11/2021	12:56:19 pm	4																								71	4	75	4	79	4	72	4
10/11/2021	12:56:39 pm	4																								72	4	75	4	80	4	73	4
10/11/2021	12:56:59 pm	4																								72	4	75	4	79	4	73	4
10/11/2021	12:57:19 pm	4																								71	4	75	4	79	4	73	4
10/11/2021	12:57:39 pm	4																								72	4	75	4	80	4	74	4
10/11/2021	12:57:59 pm	4																								72	4	76	4	80	4	74	4
10/11/2021	12:58:19 pm	4																								73	4	76	4	80	4	73	4
10/11/2021	12:58:39 pm	4																								73	4	76	4	80	4	73	4
10/11/2021	12:58:59 pm	4																								72	4	76	4	80	4	73	4
10/11/2021	12:59:19 pm	4																								73	4	76	4	82	4	75	4
10/11/2021	12:59:39 pm	4																								73	4	76	4	82	4	75	4
10/11/2021	12:59:59 pm	4																								73	4	76	4	82	4	74	4
10/11/2021	1:00:19 pm	4																								74	4	76	4	82	4	75	4
10/11/2021	1:00:39 pm	4																								74	4	76	4	83	4	75	4
10/11/2021	1:00:59 pm	4																								75	4	76	4	83	4	75	4
10/11/2021	1:01:19 pm	4																								75	4	77	4	84	4	76	4
10/11/2021	1:01:39 pm	4																								75	4	77	4	83	4	76	4
10/11/2021	1:01:59 pm	4																								74	4	76	4	83	4	76	4
10/11/2021	1:02:19 pm	4																								74	4	76	4	83	4	76	4
10/11/2021	1:02:39 pm	4																								74	4	76	4	83	4	75	4
10/11/2021	1:02:59 pm	4																								74	4	76	4	83	4	76	4
10/11/2021	1:03:19 pm	4																								74	4	76	4	83	4	75	4
10/11/2021	1:03:39 pm	4																								74	4	76	4	82	4	75	4
10/11/2021	1:03:59 pm	4																								74	4	76	4	83	4	75	4
10/11/2021	1:04:19 pm	4																								74	4	76	4	82	4	75	4
10/11/2021	1:04:39 pm	4																								74	4	76	4	83	4	76	4
10/11/2021	1:04:59 pm	4																								74	4	76	4	82	4	74	4
10/11/2021	1:05:19 pm	4																								74	4	76	4	83	4	74	4
10/11/2021	1:05:39 pm	4																								76	4	78	4	85	4	79	4
10/11/2021	1:05:59 pm	4																								78	4	78	4	87	4	81	4
10/11/2021	1:06:19 pm	4																								77	4	79	4	87	4	81	4
10/11/2021	1:06:39 pm	4																								78	4	79	4	87	4	82	4
10/11/2021	1:06:59 pm	4																								78	4	78	4	87	4	81	4
10/11/2021	1:07:19 pm	4																								78	4	79	4	87	4	82	4
10/11/2021	1:07:39 pm	4																								79	4	78	4	87	4	82	4
10/11/2021	1:07:59 pm	4																								78	4	78	4	86	4	81	4
10/11/2021	1:08:19 pm	4																								77	4	78	4	85	4	80	4
10/11/2021	1:08:39 pm	4																								76	4	78	4	85	4	79	4
10/11/2021	1:08:59 pm	4																								74	4	77	4	84	4	79	4
10/11/2021	1:09:19 pm	4																								74	4	77	4	84	4	78	4
10/11/2021	1:09:39 pm	4																								74	4	77	4	83	4	76	4
10/11/2021	1:09:59 pm	4																								75	4	76	4	83	4	76	4
10/11/2021	1:10:19 pm	4																								76	4	74	4	82	4	75	4
10/11/2021	1:10:39 pm	4																								75	4	76	4	81	4	78	4
10/11/2021	1:10:59 pm	4																								75	4	76	4	80	4	78	4
10/11/2021	1:11:19 pm	4																								75	4	76	4	81	4	79	4
10/11/2021	1:11:39 pm	4																								75	4	77	4	81	4	79	4
10/11/2021	1:11:59 pm	4																								75	4	77	4	81	4	78	4
10/11/2021	1:12:19 pm	4																								75	4	77	4	80	4	78	4
10/11/2021	1:12:39 pm	4																								75	4	77	4	80	4	78	4
10/11/2021	1:12:59 pm	4																								75	4	76	4	80	4	77	4
10/11/2021	1:13:19 pm	4																								75	4	76	4	80	4	77	4
10/11/2021	1:13:39 pm	4																								77	4	76	4	81	4	77	4
10/11/2021	1:13:59 pm	4																								76	4	77	4	82	4	76	4
10/11/2021	1:14:19 pm	4																								75	4	77	4	82	4	76	4
10/11/2021	1:14:39 pm	4																								75	4	77	4	81	4	76	4
10/11/2021	1:14:59 pm	4																								78	4	77	4	82	4	76	4
10/11/2021	1:15:19 pm	4																								79	4	77	4	82	4	75	4
10/11/2021	1:15:39 pm	4																								79	4	76	4	82	4	74	4
10/11/2021	1:15:59 pm	4																								77	4	76	4	82	4	74	4
10/11/2021	1:16:19 pm	4																								76	4	76	4	82	4	73	4
10/11/2021	1:16:39 pm	4																								76	4	76	4	82	4	73	4
10/11/2021	1:16:59 pm	4																								76	4	76	4	82	4	72	4
10/11/2021	1:17:19 pm	4																								76	4	76	4	82	4	72	4
10/11/2021	1:17:39 pm	4																								76	4	76	4	82	4	72	4
10/11/2021	1:17:59 pm	4																								76	4	76	4	81	4	72	4
10/11/2021	1:18:19 pm	4																								76	4	76	4	82	4	72	4
10/11/2021	1:18:39 pm	4																								76	4	75	4	81	4	73	4
10/11/2021	1:18:59 pm	4																								76	4	76	4	82	4	73	4
10/11/2021	1:19:19 pm	4																								76	4	75	4	82	4	73	4
10/11/2021	1:19:39 pm	4																								76	4	75	4	82	4	73	4
10/11/2021	1:19:59 pm	4																								76	4	75	4	82	4	73	4
10/11/2021	1:20:19 pm	4																								76	4	75	4	82	4	74	4
10/11/2021	1:20:39 pm	4																								76	4	75	4	82	4	75	4
10/11/2021	1:20:59 pm	4																								76	4	75	4	83	4	73	4
10/11/2021	1:21:19 pm	4																								77	4	74	4	81	4	74	4
10/11/2021	1:21:39 pm	4																								76	4	74	4	82	4	72	4
10/11/2021	1:21:59 pm	4																								76	4	75	4	81	4	75	4
10/11/2021	1:22:19 pm	4																								76	4	75	4	82	4	73	4
10/11/2021	1:22:39 pm	4																								76	4	75	4	82	4	73	4
10/11/2021	1:22:59 pm	4																								76	4	75	4	82	4	73	4
10/11/2021	1:23:19 pm	4																								75	4	75	4	82	4	75	4
10/11/2021	1:23:39 pm	4																								75	4	75	4	82	4	74	4
10/11/2021	1:23:59 pm	4																								75	4	75	4	82	4	74	4
10/11/2021	1:24:19 pm	4																								75	4	75	4	82	4	74	4
10/11/2021	1:24:39 pm	4																								75	4	75	4	82	4	74	4
10/11/2021	1:24:59 pm	4																								74	4	75	4	81	4	74	4
10/11/2021	1:25:19 pm	4																								75	4	75	4	81	4	73	4
10/11/2021	1:25:39 pm	4																								76	4	75	4	81	4	73	4
10/11/2021	1:25:59 pm	4																								74	4	74	4	81	4	74	4
10/11/2021	1:26:19 pm	4																								75	4	75	4	82	4	73	4
10/11/2021	1:26:39 pm	4																								75	4	75	4	81	4	73	4
10/11/2021	1:26:59 pm	4																								76	4	74	4	81	4	72	4
10/11/2021	1:27:19 pm	4																								76	4	74	4	81	4	75	4
10/11/2021	1:27:39 pm	4																								75	4	74	4	82	4	73	4
10/11/2021	1:27:59 pm	4																								75	4	74	4	81	4	73	4
10/11/2021	1:28:19 pm	4																								76	4	74	4	81	4	72	4
10/11/2021	1:28:39 pm	4																								75	4	73	4	80	4	74	4
10/11/2021	1:28:59 pm	4																								74	4	74	4	82	4	73	4
10/11/2021	1:29:19 pm	4																								74	4	74	4	80	4	74	4
10/11/2021	1:29:39 pm	4																								74	4	74	4	81	4	72	4
10/11/2021	1:29:59 pm	4																								75	4	74	4	80	4	73	4
10/11/2021	1:30:19 pm	4																								74	4	74	4	81	4	72	4
10/11/2021	1:30:39 pm	4																								74	4	74	4	81	4	75	4
10/11/2021	1:30:59 pm	4																								74	4	74	4	81	4	73	4
10/11/2021	1:31:19 pm	4																								74	4	74	4	81	4	74	4
10/11/2021	1:31:39 pm	4																								74	4	74	4	81	4	72	4
10/11/2021	1:31:59 pm	4																								73	4	74	4	80	4	73	4
10/11/2021	1:32:19 pm	4																								73	4	74	4	81	4	72	4
10/11/2021	1:32:39 pm	4																								73	4	73	4	81	4	72	4
10/11/2021	1:32:59 pm	4																								73	4	74	4	80	4	72	4
10/11/2021	1:33:19 pm	4																								73	4	74	4	80	4	72	4
10/11/2021	1:33:39 pm	4																								73	4	74	4	80	4	72	4
10/11/2021	1:33:59 pm	4																								73	4	73	4	80	4	72	4
10/11/2021	1:34:19 pm	4																								73	4	73	4	80	4	71	4
10/11/2021	1:34:39 pm	4																								73	4	73	4	80	4	72	4
10/11/2021	1:34:59 pm	4																								73	4	73	4	80	4	72	4
10/11/2021	1:35:19 pm	4																								73	4	73	4	80	4	71	4
10/11/2021	1:35:39 pm	4																								72	4	73	4	80	4	72	4
10/11/2021	1:35:59 pm	4																								73	4	73	4	80	4	71	4
10/11/2021	1:36:19 pm	4																								72	4	73	4	80	4	71	4
10/11/2021	1:36:39 pm	4																								73	4	73	4	80	4	72	4
10/11/2021	1:36:59 pm	4																								73	4	73	4	80	4	72	4
10/11/2021	1:37:19 pm	4																								72	4	73	4	80	4	72	4
10/11/2021	1:37:39 pm	4																								72	4	73	4	80	4	72	4
10/11/2021	1:37:59 pm	4																								72	4	73	4	80	4	71	4
10/11/2021	1:38:19 pm	4																								72	4	73	4	80	4	72	4
10/11/2021	1:38:39 pm	4																								71	4	73	4	80	4	72	4
10/11/2021	1:38:59 pm	4																								72	4	73	4	80	4	72	4
10/11/2021	1:39:19 pm	4																								72	4	73	4	80	4	72	4
10/11/2021	1:39:39 pm	4																								72	4	72	4	80	4	71	4
10/11/2021	1:39:59 pm	4																								72	4	72	4	79	4	72	4
10/11/2021	1:40:19 pm	4																								72	4	72	4	79	4	71	4
10/11/2021	1:40:39 pm	4																								72	4	72	4	80	4	72	4
10/11/2021	1:40:59 pm	4																								72	4	72	4	79	4	72	4
10/11/2021	1:41:19 pm	4																								72	4	72	4	79	4	72	4
10/11/2021	1:41:39 pm	4																								72	4	72	4	79	4	72	4
10/11/2021	1:41:59 pm	4																								71	4	72	4	79	4	72	4
10/11/2021	1:42:19 pm	4																								72	4	72	4	79	4	72	4
10/11/2021	1:42:39 pm	4																								71	4	72	4	79	4	72	4
10/11/2021	1:42:59 pm	4																								71	4	72	4	79	4	71	4
10/11/2021	1:43:19 pm	4																								71	4	72	4	79	4	72	4
10/11/2021	1:43:39 pm	4																								71	4	72	4	79	4	71	4
10/11/2021	1:43:59 pm	4																								71	4	72	4	79	4	72	4
10/11/2021	1:44:19 pm	4																								71	4	72	4	79	4	71	4
10/11/2021	1:44:39 pm	4																								71	4	72	4	79	4	71	4
10/11/2021	1:44:59 pm	4																								71	4	71	4	79	4	71	4
10/11/2021	1:45:19 pm	4																								71	4	72	4	79	4	71	4
10/11/2021	1:45:39 pm	4																								71	4	71	4	79	4	71	4
10/11/2021	1:45:59 pm	4																								71	4	72	4	79	4	71	4
10/11/2021	1:46:19 pm	4																								72	4	72	4	79	4	72	4
10/11/2021	1:46:39 pm	4																								72	4	72	4	80	4	71	4
10/11/2021	1:46:59 pm	4																								72	4	72	4	80	4	72	4
10/11/2021	1:47:19 pm	4																								72	4	72	4	80	4	72	4
10/11/2021	1:47:39 pm	4																								73	4	72	4	80	4	71	4
10/11/2021	1:47:59 pm	4																								73	4	72	4	80	4	71	4
10/11/2021	1:48:19 pm	4																								73	4	72	4	80	4	71	4
10/11/2021	1:48:39 pm	4																								73	4	72	4	80	4	71	4
10/11/2021	1:48:59 pm	4																								73	4	72	4	80	4	71	4
10/11/2021	1:49:19 pm	4																								73	4	72	4	80	4	71	4
10/11/2021	1:49:39 pm	4																								72	4	72	4	80	4	70	4
10/11/2021	1:49:59 pm	4																								72	4	72	4	79	4	71	4
10/11/2021	1:50:19 pm	4																								72	4	72	4	79	4	70	4
10/11/2021	1:50:39 pm	4																								72	4	72	4	79	4	70	4
10/11/2021	1:50:59 pm	4																								72	4	72	4	79	4	70	4
10/11/2021	1:51:19 pm	4																								71	4	72	4	79	4	71	4
10/11/2021	1:51:39 pm	4																								71	4	72	4	79	4	70	4
10/11/2021	1:51:59 pm	4																								72	4	72	4	79	4	70	4
10/11/2021	1:52:19 pm	4																								71	4	72	4	79	4	70	4
10/11/2021	1:52:39 pm	4																								71	4	71	4	79	4	71	4
10/11/2021	1:52:59 pm	4																								71	4	71	4	79	4	71	4
10/11/2021	1:53:19 pm	4																								71	4	71	4	79	4	70	4
10/11/2021	1:53:39 pm	4																								71	4	71	4	79	4	70	4
10/11/2021	1:53:59 pm	4																								71	4	71	4	79	4	70	4
10/11/2021	1:54:19 pm	4																								71	4	71	4	79	4	70	4
10/11/2021	1:54:39 pm	4																								71	4	71	4	79	4	70	4
10/11/2021	1:54:59 pm	4																								71	4	71	4	79	4	70	4
10/11/2021	1:55:19 pm	4																								71	4	72	4	79	4	71	4
10/11/2021	1:55:39 pm	4																								71	4	72	4	79	4	71	4
10/11/2021	1:55:59 pm	4																								71	4	72	4	79	4	71	4
10/11/2021	1:56:19 pm	4																								71	4	72	4	79	4	71	4
10/11/2021	1:56:39 pm	4																								71	4	72	4	79	4	71	4
10/11/2021	1:56:59 pm	4																								71	4	72	4	79	4	71	4
10/11/2021	1:57:19 pm	4																								72	4	72	4	79	4	71	4
10/11/2021	1:57:39 pm	4																								71	4	72	4	79	4	71	4
10/11/2021	1:57:59 pm	4																								71	4	72	4	79	4	71	4
10/11/2021	1:58:19 pm	4																								72	4	71	4	79	4	71	4
10/11/2021	1:58:39 pm	4																								71	4	71	4	79	4	71	4
10/11/2021	1:58:59 pm	4																								71	4	71	4	79	4	71	4
10/11/2021	1:59:19 pm	4																								71	4	71	4	79	4	71	4
10/11/2021	1:59:39 pm	4																								71	4	71	4	79	4	71	4
10/11/2021	1:59:59 pm	4																								71	4	71	4	79	4	71	4
10/11/2021	2:00:19 pm	4																								70	4	71	4	79	4	71	4
10/11/2021	2:00:39 pm	4																								71	4	71	4	78	4	71	4
10/11/2021	2:00:59 pm	4																								70	4	71	4	79	4	70	4
10/11/2021	2:01:19 pm	4																								70	4	71	4	79	4	71	4
10/11/2021	2:01:39 pm	4																								70	4	71	4	78	4	71	4
10/11/2021	2:01:59 pm	4																								70	4	71	4	78	4	70	4
10/11/2021	2:02:19 pm	4																								70	4	71	4	78	4	71	4
10/11/2021	2:02:39 pm	4																								70	4	71	4	78	4	70	4
10/11/2021	2:02:59 pm	4																								70	4	71	4	78	4	70	4
10/11/2021	2:03:19 pm	4																								70	4	70	4	78	4	70	4
10/11/2021	2:03:39 pm	4																								69	4	70	4	78	4	70	4
10/11/2021	2:03:59 pm	4																								70	4	71	4	78	4	70	4
10/11/2021	2:04:19 pm	4																								69	4	70	4	78	4	70	4
10/11/2021	2:04:39 pm	4																								69	4	70	4	78	4	70	4
10/11/2021	2:04:59 pm	4																								69	4	70	4	77	4	70	4
10/11/2021	2:05:19 pm	4																								69	4	70	4	77	4	69	4
10/11/2021	2:05:39 pm	4																								69	4	70	4	77	4	70	4
10/11/2021	2:05:59 pm	4																								69	4	70	4	77	4	69	4
10/11/2021	2:06:19 pm	4																								69	4	70	4	77	4	69	4
10/11/2021	2:06:39 pm	4																								69	4	70	4	77	4	69	4
10/11/2021	2:06:59 pm	4																								69	4	70	4	77	4	69	4
10/11/2021	2:07:19 pm	4																								69	4	70	4	77	4	70	4
10/11/2021	2:07:39 pm	4																								68	4	70	4	77	4	69	4
10/11/2021	2:07:59 pm	4																								68	4	69	4	76	4	68	4
10/11/2021	2:08:19 pm	4																								68	4	70	4	77	4	69	4
10/11/2021	2:08:39 pm	4																								68	4	69	4	77	4	69	4
10/11/2021	2:08:59 pm	4																								68	4	69	4	77	4	69	4
10/11/2021	2:09:19 pm	4																								68	4	69	4	77	4	69	4
10/11/2021	2:09:39 pm	4																								68	4	69	4	77	4	69	4
10/11/2021	2:09:59 pm	4																								68	4	69	4	77	4	69	4
10/11/2021	2:10:19 pm	4																								68	4	69	4	77	4	69	4
10/11/2021	2:10:39 pm	4																								68	4	69	4	76	4	69	4
10/11/2021	2:10:59 pm	4																								68	4	69	4	77	4	69	4
10/11/2021	2:11:19 pm	4																								67	4	69	4	76	4	69	4
10/11/2021	2:11:39 pm	4																								67	4	69	4	76	4	69	4
10/11/2021	2:11:59 pm	4																								67	4	69	4	76	4	69	4
10/11/2021	2:12:19 pm	4																								67	4	69	4	76	4	68	4
10/11/2021	2:12:39 pm	4																								67	4	69	4	76	4	68	4
10/11/2021	2:12:59 pm	4																								67	4	69	4	76	4	68	4
10/11/2021	2:13:19 pm	4																								67	4	69	4	76	4	68	4
10/11/2021	2:13:39 pm	4																								66	4	69	4	76	4	68	4
10/11/2021	2:13:59 pm	4																								66	4	68	4	76	4	69	4
10/11/2021	2:14:19 pm	4																								66	4	68	4	76	4	68	4
10/11/2021	2:14:39 pm	4																								66	4	68	4	76	4	68	4
10/11/2021	2:14:59 pm	4																								66	4	68	4	75	4	68	4
10/11/2021	2:15:19 pm	4																								66	4	68	4	76	4	68	4
10/11/2021	2:15:39 pm	4																								66	4	68	4	75	4	67	4
10/11/2021	2:15:59 pm	4																								66	4	68	4	75	4	68	4
10/11/2021	2:16:19 pm	4																								66	4	68	4	75	4	67	4
10/11/2021	2:16:39 pm	4																								66	4	68	4	75	4	68	4
10/11/2021	2:16:59 pm	4																								66	4	68	4	75	4	68	4
10/11/2021	2:17:19 pm	4																								66	4	68	4	75	4	67	4
10/11/2021	2:17:39 pm	4																								66	4	68	4	75	4	68	4
10/11/2021	2:17:59 pm	4																								66	4	68	4	75	4	67	4
10/11/2021	2:18:19 pm	4																								65	4	68	4	75	4	67	4
10/11/2021	2:18:39 pm	4																								65	4	68	4	75	4	67	4
10/11/2021	2:18:59 pm	4																								66	4	68	4	75	4	68	4
10/11/2021	2:19:19 pm	4																								66	4	68	4	76	4	68	4
10/11/2021	2:19:39 pm	4																								66	4	68	4	76	4	68	4
10/11/2021	2:19:59 pm	4																								66	4	68	4	76	4	69	4
10/11/2021	2:20:19 pm	4																								66	4	68	4	76	4	69	4
10/11/2021	2:20:39 pm	4																								66	4	68	4	76	4	69	4
10/11/2021	2:20:59 pm	4																								66	4	68	4	76	4	69	4
10/11/2021	2:21:19 pm	4																								66	4	68	4	76	4	68	4
10/11/2021	2:21:39 pm	4																								66	4	68	4	76	4	68	4
10/11/2021	2:21:59 pm	4																								66	4	68	4	76	4	68	4
10/11/2021	2:22:19 pm	4																								66	4	68	4	76	4	69	4
10/11/2021	2:22:39 pm	4																								66	4	68	4	76	4	69	4
10/11/2021	2:22:59 pm	4																								66	4	68	4	76	4	68	4
10/11/2021	2:23:19 pm	4																								66	4	68	4	76	4	69	4
10/11/2021	2:23:39 pm	4																								66	4	68	4	76	4	69	4
10/11/2021	2:23:59 pm	4																								66	4	68	4	76	4	69	4
10/11/2021	2:24:19 pm	4																								66	4	68	4	76	4	69	4
10/11/2021	2:24:39 pm	4																								66	4	68	4	76	4	69	4
10/11/2021	2:24:59 pm	4																								66	4	68	4	76	4	69	4
10/11/2021	2:25:19 pm	4																								66	4	68	4	76	4	69	4
10/11/2021	2:25:39 pm	4																								66	4	68	4	76	4	69	4
10/11/2021	2:25:59 pm	4																								66	4	68	4	76	4	69	4
10/11/2021	2:26:19 pm	4																								66	4	68	4	76	4	69	4
10/11/2021	2:26:39 pm	4																								66	4	68	4	76	4	69	4
10/11/2021	2:26:59 pm	4																								66	4	68	4	76	4	69	4
10/11/2021	2:27:19 pm	4																								66	4	68	4	76	4	69	4
10/11/2021	2:27:39 pm	4																								66	4	68	4	76	4	69	4
10/11/2021	2:27:59 pm	4																								67	4	69	4	76	4	70	4
10/11/2021	2:28:19 pm	4																								68	4	69	4	76	4	70	4
10/11/2021	2:28:39 pm	4																								68	4	70	4	76	4	71	4
10/11/2021	2:28:59 pm	4																								69	4	70	4	77	4	70	4
10/11/2021	2:29:19 pm	4																								69	4	70	4	77	4	71	4
10/11/2021	2:29:39 pm	4																								69	4	70	4	76	4	70	4
10/11/2021	2:29:59 pm	4																								68	4	70	4	76	4	70	4
10/11/2021	2:30:19 pm	4																								68	4	70	4	76	4	69	4
10/11/2021	2:30:39 pm	4																								68	4	70	4	77	4	70	4
10/11/2021	2:30:59 pm	4																								69	4	70	4	77	4	70	4
10/11/2021	2:31:19 pm	4																								69	4	70	4	77	4	70	4
10/11/2021	2:31:39 pm	4																								69	4	70	4	77	4	70	4
10/11/2021	2:31:59 pm	4																								69	4	70	4	77	4	70	4
10/11/2021	2:32:19 pm	4																								69	4	70	4	77	4	71	4
10/11/2021	2:32:39 pm	4																								69	4	70	4	77	4	71	4
10/11/2021	2:32:59 pm	4																								69	4	70	4	77	4	71	4
10/11/2021	2:33:19 pm	4																								69	4	70	4	77	4	71	4
10/11/2021	2:33:39 pm	4																								69	4	70	4	77	4	71	4
10/11/2021	2:33:59 pm	4																								69	4	70	4	77	4	71	4
10/11/2021	2:34:19 pm	4																								68	4	70	4	77	4	71	4
10/11/2021	2:34:39 pm	4																								68	4	70	4	77	4	71	4
10/11/2021	2:34:59 pm	4																								68	4	70	4	77	4	71	4
10/11/2021	2:35:19 pm	4																								68	4	70	4	77	4	71	4
10/11/2021	2:35:39 pm	4																								68	4	69	4	77	4	71	4
10/11/2021	2:35:59 pm	4																								68	4	69	4	77	4	71	4
10/11/2021	2:36:19 pm	4																								68	4	69	4	77	4	70	4
10/11/2021	2:36:39 pm	4																								67	4	69	4	77	4	70	4
10/11/2021	2:36:59 pm	4																								67	4	69	4	77	4	70	4
10/11/2021	2:37:19 pm	4																								67	4	69	4	76	4	70	4
10/11/2021	2:37:39 pm	4																								67	4	69	4	76	4	70	4
10/11/2021	2:37:59 pm	4																								67	4	69	4	76	4	70	4
10/11/2021	2:38:19 pm	4																								67	4	69	4	76	4	70	4
10/11/2021	2:38:39 pm	4																								67	4	69	4	76	4	70	4
10/11/2021	2:38:59 pm	4																								67	4	69	4	76	4	70	4
10/11/2021	2:39:19 pm	4																								67	4	69	4	76	4	69	4
10/11/2021	2:39:39 pm	4																								67	4	69	4	76	4	69	4
10/11/2021	2:39:59 pm	4																								66	4	69	4	76	4	69	4
10/11/2021	2:40:19 pm	4																								66	4	69	4	76	4	69	4
10/11/2021	2:40:39 pm	4																								66	4	69	4	76	4	70	4
10/11/2021	2:40:59 pm	4																								67	4	69	4	76	4	70	4
10/11/2021	2:41:19 pm	4																								67	4	69	4	76	4	70	4
10/11/2021	2:41:39 pm	4																								66	4	69	4	76	4	70	4
10/11/2021	2:41:59 pm	4																								66	4	69	4	76	4	70	4
10/11/2021	2:42:19 pm	4																								66	4	68	4	76	4	69	4
10/11/2021	2:42:39 pm	4																								66	4	68	4	76	4	69	4
10/11/2021	2:42:59 pm	4																								66	4	68	4	76	4	69	4
10/11/2021	2:43:19 pm	4																								65	4	68	4	75	4	69	4
10/11/2021	2:43:39 pm	4																								65	4	68	4	75	4	69	4
10/11/2021	2:43:59 pm	4																								65	4	68	4	75	4	69	4
10/11/2021	2:44:19 pm	4																								65	4	68	4	75	4	68	4
10/11/2021	2:44:39 pm	4																								65	4	68	4	75	4	68	4
10/11/2021	2:44:59 pm	4																								65	4	68	4	75	4	68	4
10/11/2021	2:45:19 pm	4																								65	4	68	4	75	4	68	4
10/11/2021	2:45:39 pm	4																								65	4	68	4	75	4	68	4
10/11/2021	2:45:59 pm	4																								65	4	68	4	75	4	69	4
10/11/2021	2:46:19 pm	4																								65	4	68	4	75	4	69	4
10/11/2021	2:46:39 pm	4																								65	4	68	4	75	4	69	4
10/11/2021	2:46:59 pm	4																								65	4	68	4	75	4	69	4
10/11/2021	2:47:19 pm	4																								65	4	68	4	75	4	69	4
10/11/2021	2:47:39 pm	4																								65	4	68	4	75	4	69	4
10/11/2021	2:47:59 pm	4																								65	4	68	4	75	4	69	4
10/11/2021	2:48:19 pm	4																								65	4	68	4	75	4	69	4
10/11/2021	2:48:39 pm	4																								65	4	68	4	75	4	69	4
10/11/2021	2:48:59 pm	4																								65	4	68	4	75	4	69	4
10/11/2021	2:49:19 pm	4																								65	4	68	4	75	4	69	4
10/11/2021	2:49:39 pm	4																								65	4	68	4	75	4	69	4
10/11/2021	2:49:59 pm	4																								65	4	68	4	75	4	69	4
10/11/2021	2:50:19 pm	4																								65	4	68	4	75	4	70	4
10/11/2021	2:50:39 pm	4																								65	4	68	4	75	4	69	4
10/11/2021	2:50:59 pm	4																								65	4	68	4	75	4	69	4
10/11/2021	2:51:19 pm	4																								65	4	68	4	75	4	69	4
10/11/2021	2:51:39 pm	4																								65	4	68	4	75	4	69	4
10/11/2021	2:51:59 pm	4																								65	4	68	4	75	4	69	4
10/11/2021	2:52:19 pm	4																								65	4	68	4	75	4	69	4
10/11/2021	2:52:39 pm	4																								65	4	68	4	75	4	69	4
10/11/2021	2:52:59 pm	4																								65	4	68	4	75	4	69	4
10/11/2021	2:53:19 pm	4																								65	4	68	4	75	4	69	4
10/11/2021	2:53:39 pm	4																								65	4	68	4	75	4	69	4
10/11/2021	2:53:59 pm	4																								65	4	68	4	75	4	69	4
10/11/2021	2:54:19 pm	4																								65	4	68	4	75	4	69	4
10/11/2021	2:54:39 pm	4																								65	4	68	4	75	4	69	4
10/11/2021	2:54:59 pm	4																								65	4	68	4	75	4	69	4
10/11/2021	2:55:19 pm	4																								65	4	68	4	75	4	69	4
10/11/2021	2:55:39 pm	4																								65	4	68	4	75	4	69	4
10/11/2021	2:55:59 pm	4																								65	4	68	4	75	4	69	4
10/11/2021	2:56:19 pm	4																								65	4	68	4	75	4	69	4
10/11/2021	2:56:39 pm	4																								65	4	68	4	75	4	69	4
10/11/2021	2:56:59 pm	4																								65	4	68	4	75	4	70	4
10/11/2021	2:57:19 pm	4																								65	4	68	4	75	4	70	4
10/11/2021	2:57:39 pm	4																								65	4	68	4	75	4	70	4
10/11/2021	2:57:59 pm	4																								65	4	68	4	75	4	70	4
10/11/2021	2:58:19 pm	4																								65	4	68	4	75	4	69	4
10/11/2021	2:58:39 pm	4																								65	4	68	4	75	4	70	4
10/11/2021	2:58:59 pm	4																								65	4	68	4	75	4	70	4
10/11/2021	2:59:19 pm	4																								65	4	68	4	75	4	70	4
10/11/2021	2:59:39 pm	4																								65	4	68	4	75	4	69	4
10/11/2021	2:59:59 pm	4																								65	4	68	4	75	4	70	4
10/11/2021	3:00:19 pm	4																								65	4	68	4	75	4	70	4
10/11/2021	3:00:39 pm	4																								65	4	68	4	75	4	69	4
10/11/2021	3:00:59 pm	4																								65	4	68	4	75	4	69	4
10/11/2021	3:01:19 pm	4																								65	4	68	4	75	4	69	4
10/11/2021	3:01:39 pm	4																								65	4	68	4	75	4	70	4
10/11/2021	3:01:59 pm	4																								65	4	68	4	75	4	70	4
10/11/2021	3:02:19 pm	4																								65	4	68	4	75	4	70	4
10/11/2021	3:02:39 pm	4																								65	4	68	4	75	4	70	4
10/11/2021	3:02:59 pm	4																								65	4	68	4	75	4	70	4
10/11/2021	3:03:19 pm	4																								65	4	68	4	75	4	70	4
10/11/2021	3:03:39 pm	4																								65	4	68	4	75	4	70	4
10/11/2021	3:03:59 pm	4																								65	4	68	4	75	4	70	4
10/11/2021	3:04:19 pm	4																								65	4	68	4	75	4	70	4
10/11/2021	3:04:39 pm	4																								65	4	68	4	75	4	70	4
10/11/2021	3:04:59 pm	4																								65	4	68	4	75	4	70	4
10/11/2021	3:05:19 pm	4																								66	4	69	4	75	4	70	4
10/11/2021	3:05:39 pm	4																								66	4	69	4	76	4	70	4
10/11/2021	3:05:59 pm	4																								66	4	69	4	75	4	70	4
10/11/2021	3:06:19 pm	4																								66	4	69	4	75	4	70	4
10/11/2021	3:06:39 pm	4																								66	4	69	4	76	4	70	4
10/11/2021	3:06:59 pm	4																								66	4	69	4	76	4	70	4
10/11/2021	3:07:19 pm	4																								66	4	69	4	76	4	70	4
10/11/2021	3:07:39 pm	4																								65	4	69	4	76	4	70	4
10/11/2021	3:07:59 pm	4																								66	4	69	4	76	4	71	4
10/11/2021	3:08:19 pm	4																								66	4	69	4	76	4	71	4
10/11/2021	3:08:39 pm	4																								66	4	69	4	76	4	71	4
10/11/2021	3:08:59 pm	4																								66	4	69	4	76	4	71	4
10/11/2021	3:09:19 pm	4																								66	4	69	4	76	4	71	4
10/11/2021	3:09:39 pm	4																								66	4	69	4	76	4	71	4
10/11/2021	3:09:59 pm	4																								67	4	69	4	76	4	71	4
10/11/2021	3:10:19 pm	4																								67	4	69	4	76	4	71	4
10/11/2021	3:10:39 pm	4																								67	4	69	4	76	4	71	4
10/11/2021	3:10:59 pm	4																								67	4	69	4	76	4	71	4
10/11/2021	3:11:19 pm	4																								67	4	69	4	76	4	71	4
10/11/2021	3:11:39 pm	4																								67	4	69	4	76	4	71	4
10/11/2021	3:11:59 pm	4																								67	4	69	4	76	4	71	4
10/11/2021	3:12:19 pm	4																								67	4	69	4	76	4	72	4
10/11/2021	3:12:39 pm	4																								67	4	70	4	76	4	72	4
10/11/2021	3:12:59 pm	4																								67	4	70	4	76	4	72	4
10/11/2021	3:13:19 pm	4																								67	4	70	4	76	4	72	4
10/11/2021	3:13:39 pm	4																								68	4	70	4	77	4	72	4
10/11/2021	3:13:59 pm	4																								67	4	70	4	77	4	72	4
10/11/2021	3:14:19 pm	4																								68	4	70	4	77	4	72	4
10/11/2021	3:14:39 pm	4																								68	4	70	4	77	4	72	4
10/11/2021	3:14:59 pm	4																								68	4	70	4	77	4	72	4
10/11/2021	3:15:19 pm	4																								68	4	70	4	77	4	72	4
10/11/2021	3:15:39 pm	4																								68	4	70	4	77	4	72	4
10/11/2021	3:15:59 pm	4																								68	4	70	4	77	4	72	4
10/11/2021	3:16:19 pm	4																								68	4	70	4	77	4	72	4
10/11/2021	3:16:39 pm	4																								68	4	70	4	77	4	72	4
10/11/2021	3:16:59 pm	4																								68	4	70	4	77	4	73	4
10/11/2021	3:17:19 pm	4																								68	4	70	4	77	4	72	4
10/11/2021	3:17:39 pm	4																								68	4	70	4	77	4	72	4
10/11/2021	3:17:59 pm	4																								68	4	70	4	77	4	72	4
10/11/2021	3:18:19 pm	4																								68	4	70	4	77	4	73	4
10/11/2021	3:18:39 pm	4																								68	4	70	4	77	4	72	4
10/11/2021	3:18:59 pm	4																								68	4	70	4	77	4	72	4
10/11/2021	3:19:19 pm	4																								67	4	70	4	76	4	72	4
10/11/2021	3:19:39 pm	4																								68	4	70	4	77	4	71	4
10/11/2021	3:19:59 pm	4																								68	4	70	4	77	4	72	4
10/11/2021	3:20:19 pm	4																								67	4	70	4	77	4	72	4
10/11/2021	3:20:39 pm	4																								68	4	70	4	77	4	72	4
10/11/2021	3:20:59 pm	4																								68	4	70	4	77	4	72	4
10/11/2021	3:21:19 pm	4																								68	4	70	4	77	4	72	4
10/11/2021	3:21:39 pm	4																								67	4	70	4	77	4	72	4
10/11/2021	3:21:59 pm	4																								68	4	70	4	77	4	72	4
10/11/2021	3:22:19 pm	4																								68	4	70	4	77	4	72	4
10/11/2021	3:22:39 pm	4																								68	4	70	4	77	4	72	4
10/11/2021	3:22:59 pm	4																								68	4	70	4	77	4	72	4
10/11/2021	3:23:19 pm	4																								68	4	70	4	77	4	72	4
10/11/2021	3:23:39 pm	4																								68	4	70	4	77	4	73	4
10/11/2021	3:23:59 pm	4																								68	4	71	4	78	4	73	4
10/11/2021	3:24:19 pm	4																								69	4	71	4	78	4	74	4
10/11/2021	3:24:39 pm	4																								69	4	71	4	78	4	74	4
10/11/2021	3:24:59 pm	4																								69	4	71	4	78	4	73	4
10/11/2021	3:25:19 pm	4																								69	4	71	4	78	4	73	4
10/11/2021	3:25:39 pm	4																								69	4	71	4	78	4	73	4
10/11/2021	3:25:59 pm	4																								69	4	71	4	78	4	73	4
10/11/2021	3:26:19 pm	4																								69	4	71	4	78	4	74	4
10/11/2021	3:26:39 pm	4																								69	4	71	4	78	4	74	4
10/11/2021	3:26:59 pm	4																								69	4	71	4	78	4	74	4
10/11/2021	3:27:19 pm	4																								69	4	71	4	78	4	74	4
10/11/2021	3:27:39 pm	4																								69	4	71	4	78	4	73	4
10/11/2021	3:27:59 pm	4																								69	4	71	4	78	4	74	4
10/11/2021	3:28:19 pm	4																								68	4	71	4	78	4	73	4
10/11/2021	3:28:39 pm	4																								69	4	71	4	78	4	73	4
10/11/2021	3:28:59 pm	4																								69	4	71	4	78	4	73	4
10/11/2021	3:29:19 pm	4																								69	4	71	4	78	4	74	4
10/11/2021	3:29:39 pm	4																								69	4	71	4	78	4	73	4
10/11/2021	3:29:59 pm	4																								69	4	71	4	78	4	73	4
10/11/2021	3:30:19 pm	4																								69	4	71	4	78	4	74	4
10/11/2021	3:30:39 pm	4																								69	4	71	4	78	4	73	4
10/11/2021	3:30:59 pm	4																								69	4	71	4	78	4	73	4
10/11/2021	3:31:19 pm	4																								69	4	71	4	78	4	73	4
10/11/2021	3:31:39 pm	4																								69	4	71	4	78	4	73	4
10/11/2021	3:31:59 pm	4																								69	4	71	4	78	4	73	4
10/11/2021	3:32:19 pm	4																								69	4	71	4	78	4	73	4
10/11/2021	3:32:39 pm	4																								69	4	71	4	78	4	73	4
10/11/2021	3:32:59 pm	4																								69	4	71	4	77	4	72	4
10/11/2021	3:33:19 pm	4																								69	4	71	4	78	4	73	4
10/11/2021	3:33:39 pm	4																								69	4	71	4	78	4	73	4
10/11/2021	3:33:59 pm	4																								69	4	71	4	78	4	73	4
10/11/2021	3:34:19 pm	4																								69	4	71	4	78	4	73	4
10/11/2021	3:34:39 pm	4																								69	4	71	4	78	4	73	4
10/11/2021	3:34:59 pm	4																								69	4	71	4	78	4	74	4
10/11/2021	3:35:19 pm	4																								69	4	71	4	78	4	73	4
10/11/2021	3:35:39 pm	4																								69	4	71	4	78	4	74	4
10/11/2021	3:35:59 pm	4																								69	4	71	4	78	4	74	4
10/11/2021	3:36:19 pm	4																								69	4	71	4	78	4	73	4
10/11/2021	3:36:39 pm	4																								69	4	71	4	78	4	74	4
10/11/2021	3:36:59 pm	4																								69	4	71	4	78	4	74	4
10/11/2021	3:37:19 pm	4																								69	4	71	4	78	4	74	4
10/11/2021	3:37:39 pm	4																								69	4	71	4	78	4	74	4
10/11/2021	3:37:59 pm	4																								70	4	71	4	78	4	74	4
10/11/2021	3:38:19 pm	4																								70	4	71	4	78	4	73	4
10/11/2021	3:38:39 pm	4																								70	4	71	4	78	4	74	4
10/11/2021	3:38:59 pm	4																								70	4	71	4	78	4	74	4
10/11/2021	3:39:19 pm	4																								70	4	71	4	78	4	74	4
10/11/2021	3:39:39 pm	4																								70	4	71	4	78	4	74	4
10/11/2021	3:39:59 pm	4																								70	4	71	4	78	4	73	4
10/11/2021	3:40:19 pm	4																								70	4	71	4	78	4	73	4
10/11/2021	3:40:39 pm	4																								71	4	72	4	78	4	73	4
10/11/2021	3:40:59 pm	4																								70	4	71	4	78	4	72	4
10/11/2021	3:41:19 pm	4																								70	4	72	4	78	4	72	4
10/11/2021	3:41:39 pm	4																								71	4	72	4	78	4	73	4
10/11/2021	3:41:59 pm	4																								71	4	72	4	78	4	72	4
10/11/2021	3:42:19 pm	4																								71	4	72	4	78	4	72	4
10/11/2021	3:42:39 pm	4																								71	4	72	4	78	4	73	4
10/11/2021	3:42:59 pm	4																								71	4	72	4	78	4	72	4
10/11/2021	3:43:19 pm	4																								71	4	72	4	78	4	72	4
10/11/2021	3:43:39 pm	4																								71	4	72	4	78	4	73	4

## Sheet: ID 7
Date	Time	Technology	CO	sCO	CI	sCI	SV	SVI	PR	SYSART	DIAART	MAP	SVR	SVRI	SVV	PRV	PPV	EDV	sEDV	EDVI	sEDVI	RVEF	sRVEF	ScvO₂/SvO₂	SQI	StO₂ A1	TPI A1	StO₂ A2	TPI A2	StO₂ B1	TPI B1	StO₂ B2	TPI B2
		1-F, 4-SG	L/min	L/min	L/min/m²	L/min/m²	mL/b	mL/b/m²	bpm	mmHg	mmHg	mmHg	dyne-s/cm⁵	dyne-s-m²/cm⁵	%		%	mL	mL	mL/m²	mL/m²	% EFU	% EFU	%		%		%		%		%
10/18/2021	8:28:07 am	4																									65535		65535		65535		65535
10/18/2021	8:28:27 am	4																									65535		65535		65535		65535
10/18/2021	8:28:47 am	4																									65535		65535		65535		65535
10/18/2021	8:29:07 am	4																									65535		65535		65535		65535
10/18/2021	8:29:27 am	4																									65535		65535		65535		65535
10/18/2021	8:29:47 am	4																									65535		65535		65535		65535
10/18/2021	8:30:07 am	4																									65535		65535		65535		65535
10/18/2021	8:30:27 am	4
10/18/2021	8:30:47 am	4
10/18/2021	8:31:07 am	4
10/18/2021	8:31:27 am	4
10/18/2021	8:31:47 am	4
10/18/2021	8:32:07 am	4
10/18/2021	8:32:27 am	4
10/18/2021	8:32:47 am	4
10/18/2021	8:33:07 am	4
10/18/2021	8:33:27 am	4
10/18/2021	8:33:47 am	4
10/18/2021	8:34:07 am	4
10/18/2021	8:34:27 am	4
10/18/2021	8:34:47 am	4
10/18/2021	8:35:07 am	4
10/18/2021	8:35:27 am	4
10/18/2021	8:35:47 am	4
10/18/2021	8:36:07 am	4
10/18/2021	8:36:27 am	4
10/18/2021	8:36:47 am	4
10/18/2021	8:37:07 am	4
10/18/2021	8:37:27 am	4
10/18/2021	8:37:47 am	4
10/18/2021	8:38:07 am	4
10/18/2021	8:38:27 am	4
10/18/2021	8:38:47 am	4
10/18/2021	8:39:07 am	4
10/18/2021	8:39:27 am	4
10/18/2021	8:39:47 am	4
10/18/2021	8:40:07 am	4
10/18/2021	8:40:27 am	4
10/18/2021	8:40:47 am	4
10/18/2021	8:41:07 am	4
10/18/2021	8:41:27 am	4
10/18/2021	8:41:47 am	4
10/18/2021	8:42:07 am	4
10/18/2021	8:42:27 am	4
10/18/2021	8:42:47 am	4
10/18/2021	8:43:07 am	4
10/18/2021	8:43:27 am	4
10/18/2021	8:43:47 am	4
10/18/2021	8:44:07 am	4
10/18/2021	8:44:27 am	4
10/18/2021	8:44:47 am	4
10/18/2021	8:45:07 am	4
10/18/2021	8:45:27 am	4
10/18/2021	8:45:47 am	4
10/18/2021	8:46:07 am	4
10/18/2021	8:46:27 am	4
10/18/2021	8:46:47 am	4
10/18/2021	8:47:07 am	4
10/18/2021	8:47:27 am	4
10/18/2021	8:47:47 am	4
10/18/2021	8:48:07 am	4
10/18/2021	8:48:27 am	4
10/18/2021	8:48:47 am	4
10/18/2021	8:49:07 am	4
10/18/2021	8:49:27 am	4
10/18/2021	8:49:47 am	4
10/18/2021	8:50:07 am	4
10/18/2021	8:50:27 am	4
10/18/2021	8:50:47 am	4
10/18/2021	8:51:07 am	4
10/18/2021	8:51:27 am	4
10/18/2021	8:51:47 am	4
10/18/2021	8:52:07 am	4
10/18/2021	8:52:27 am	4
10/18/2021	8:52:47 am	4
10/18/2021	8:53:07 am	4
10/18/2021	8:53:27 am	4
10/18/2021	8:53:47 am	4
10/18/2021	8:54:07 am	4
10/18/2021	8:54:27 am	4
10/18/2021	8:54:47 am	4
10/18/2021	8:55:07 am	4
10/18/2021	8:55:27 am	4
10/18/2021	8:55:47 am	4
10/18/2021	8:56:07 am	4
10/18/2021	8:56:27 am	4
10/18/2021	8:56:47 am	4
10/18/2021	8:57:07 am	4
10/18/2021	8:57:27 am	4
10/18/2021	8:57:47 am	4
10/18/2021	8:58:07 am	4
10/18/2021	8:58:27 am	4
10/18/2021	8:58:47 am	4
10/18/2021	8:59:07 am	4
10/18/2021	8:59:27 am	4
10/18/2021	8:59:47 am	4
10/18/2021	9:00:07 am	4
10/18/2021	9:00:27 am	4
10/18/2021	9:00:47 am	4
10/18/2021	9:01:07 am	4
10/18/2021	9:01:27 am	4
10/18/2021	9:01:47 am	4
10/18/2021	9:02:07 am	4
10/18/2021	9:02:27 am	4
10/18/2021	9:02:47 am	4
10/18/2021	9:03:07 am	4
10/18/2021	9:03:27 am	4
10/18/2021	9:03:47 am	4
10/18/2021	9:04:07 am	4																								65	4	70	4	70	4	68	4
10/18/2021	9:04:27 am	4																								64	4	70	4	70	4	68	4
10/18/2021	9:04:47 am	4																								64	4	69	4	70	4	68	4
10/18/2021	9:05:07 am	4																								66	4	70	4	70	4	68	4
10/18/2021	9:05:27 am	4																								65	4	69	4	70	4	68	4
10/18/2021	9:05:47 am	4																								65	4	70	4	70	4	69	4
10/18/2021	9:06:07 am	4																								65	4	70	4	70	4	68	4
10/18/2021	9:06:27 am	4																								65	4	70	4	70	4	69	4
10/18/2021	9:06:47 am	4																								67	4	71	4	71	4	70	4
10/18/2021	9:07:07 am	4																								69	4	73	4	72	4	72	4
10/18/2021	9:07:27 am	4																								70	4	74	4	73	4	73	4
10/18/2021	9:07:47 am	4																								69	4	73	4	73	4	73	4
10/18/2021	9:08:07 am	4																								70	4	74	4	74	4	74	4
10/18/2021	9:08:27 am	4																								71	4	75	4	75	4	76	4
10/18/2021	9:08:47 am	4																								71	4	75	4	76	4	76	4
10/18/2021	9:09:07 am	4																								68	4	73	4	74	4	77	4
10/18/2021	9:09:27 am	4																								72	4	76	4	76	4	79	4
10/18/2021	9:09:47 am	4																								75	4	78	4	81	4	81	4
10/18/2021	9:10:07 am	4																								76	4	81	4	83	4	85	4
10/18/2021	9:10:27 am	4																								77	4	81	4	85	4	88	4
10/18/2021	9:10:47 am	4																								77	4	81	4	84	4	88	4
10/18/2021	9:11:07 am	4																								76	4	81	4	83	4	88	4
10/18/2021	9:11:27 am	4																								76	4	80	4	82	4	88	4
10/18/2021	9:11:47 am	4																								76	4	80	4	83	4	88	4
10/18/2021	9:12:07 am	4																								76	4	80	4	84	4	88	4
10/18/2021	9:12:27 am	4																								75	4	80	4	84	4	88	4
10/18/2021	9:12:47 am	4																								75	4	79	4	85	4	88	4
10/18/2021	9:13:07 am	4																								75	4	79	4	87	4	89	4
10/18/2021	9:13:27 am	4																								74	4	79	4	87	4	90	4
10/18/2021	9:13:47 am	4																								74	4	79	4	86	4	90	4
10/18/2021	9:14:07 am	4																								73	4	78	4	85	4	90	4
10/18/2021	9:14:27 am	4																								74	4	78	4	85	4	89	4
10/18/2021	9:14:47 am	4																								73	4	78	4	84	4	89	4
10/18/2021	9:15:07 am	4																								72	4	77	4	84	4	89	4
10/18/2021	9:15:27 am	4																								73	4	77	4	85	4	89	4
10/18/2021	9:15:47 am	4																								73	4	77	4	85	4	89	4
10/18/2021	9:16:07 am	4																								72	4	77	4	84	4	88	4
10/18/2021	9:16:27 am	4																								72	4	76	4	83	4	88	4
10/18/2021	9:16:47 am	4																								71	4	76	4	83	4	88	4
10/18/2021	9:17:07 am	4																								72	4	76	4	84	4	87	4
10/18/2021	9:17:27 am	4																								71	4	76	4	83	4	86	4
10/18/2021	9:17:47 am	4																								71	4	76	4	81	4	85	4
10/18/2021	9:18:07 am	4																								71	4	76	4	81	4	86	4
10/18/2021	9:18:27 am	4																								71	4	75	4	82	4	86	4
10/18/2021	9:18:47 am	4																								71	4	76	4	81	4	86	4
10/18/2021	9:19:07 am	4																								71	4	76	4	80	4	86	4
10/18/2021	9:19:27 am	4																								72	4	77	4	82	4	84	4
10/18/2021	9:19:47 am	4																								71	4	76	4	85	4	84	4
10/18/2021	9:20:07 am	4																								71	4	76	4	85	4	83	4
10/18/2021	9:20:27 am	4																								71	4	76	4	84	4	83	4
10/18/2021	9:20:47 am	4																								71	4	77	4	85	4	85	4
10/18/2021	9:21:07 am	4																								70	4	75	4	87	4	85	4
10/18/2021	9:21:27 am	4																								70	4	75	4	84	4	83	4
10/18/2021	9:21:47 am	4																								71	4	76	4	79	4	85	4
10/18/2021	9:22:07 am	4																								70	4	76	4	79	4	84	4
10/18/2021	9:22:27 am	4																								71	4	75	4	83	4	82	4
10/18/2021	9:22:47 am	4																								71	4	76	4	80	4	84	2
10/18/2021	9:23:07 am	4																								71	4	77	4	82	4	87	4
10/18/2021	9:23:27 am	4																								71	4	76	4	83	4	86	4
10/18/2021	9:23:47 am	4																								71	4	76	4	80	4	85	3
10/18/2021	9:24:07 am	4																								71	4	76	4	77	4	85	4
10/18/2021	9:24:27 am	4																								71	4	76	4	77	4	81	4
10/18/2021	9:24:47 am	4																								72	4	76	4	78	4	81	4
10/18/2021	9:25:07 am	4																								72	4	76	4	75	4	83	4
10/18/2021	9:25:27 am	4																								71	4	76	4	74	4	80	4
10/18/2021	9:25:47 am	4																								73	4	77	4	76	4	80	4
10/18/2021	9:26:07 am	4																								73	4	78	4	80	4	80	4
10/18/2021	9:26:27 am	4																								72	4	77	4	76	4	80	4
10/18/2021	9:26:47 am	4																								72	4	76	4	74	4	80	4
10/18/2021	9:27:07 am	4																								71	4	76	4	73	4	80	4
10/18/2021	9:27:27 am	4																								71	4	76	4	74	4	82	4
10/18/2021	9:27:47 am	4																								72	4	77	4	74	3	76	4
10/18/2021	9:28:07 am	4																								72	4	77	4	76	4	77	4
10/18/2021	9:28:27 am	4																								72	4	78	4	64	3	74	4
10/18/2021	9:28:47 am	4																								69	4	76	4	64	3	74	4
10/18/2021	9:29:07 am	4																								70	4	77	4	64	3	74	4
10/18/2021	9:29:27 am	4																								71	4	78	4	64	3	74	4
10/18/2021	9:29:47 am	4																								71	4	75	4	64	3	74	2
10/18/2021	9:30:07 am	4																								72	4	74	4	64	3	74	2
10/18/2021	9:30:27 am	4																								69	4	76	4	64	3	74	2
10/18/2021	9:30:47 am	4																								69	3	74	4	64	3	74	2
10/18/2021	9:31:07 am	4																								73	4	75	4	64	3	74	2
10/18/2021	9:31:27 am	4																								72	4	75	4	64	3	74	2
10/18/2021	9:31:47 am	4																								72	4	77	4	64	3	74	3
10/18/2021	9:32:07 am	4																								71	4	73	4	64	3	74	3
10/18/2021	9:32:27 am	4																								70	4	78	4	64	3	74	3
10/18/2021	9:32:47 am	4																								68	4	77	4	64	3	74	3
10/18/2021	9:33:07 am	4																								72	4	75	4	64	3	74	3
10/18/2021	9:33:27 am	4																								74	4	72	3	64	3	74	3
10/18/2021	9:33:47 am	4																								71	4	76	4	64	3	74	4
10/18/2021	9:34:07 am	4																								70	4	79	4	64	3	74	2
10/18/2021	9:34:27 am	4																								70	4	78	4	64	3	70	2
10/18/2021	9:34:47 am	4																								72	4	78	4	64	3	72	2
10/18/2021	9:35:07 am	4																								73	4	74	4	64	3	72	2
10/18/2021	9:35:27 am	4																								72	4	75	4	64	3	72	4
10/18/2021	9:35:47 am	4																								70	4	76	4	64	3	72	4
10/18/2021	9:36:07 am	4																								69	4	78	4	64	3	72	4
10/18/2021	9:36:27 am	4																								71	4	77	4	64	3	72	4
10/18/2021	9:36:47 am	4																								71	4	76	4	69	3	71	4
10/18/2021	9:37:07 am	4																								71	4	76	4	69	4	71	4
10/18/2021	9:37:27 am	4																								71	4	76	4	68	4	71	4
10/18/2021	9:37:47 am	4																								71	4	76	4	68	4	71	4
10/18/2021	9:38:07 am	4																								70	4	76	4	68	4	71	4
10/18/2021	9:38:27 am	4																								70	4	75	4	68	4	70	4
10/18/2021	9:38:47 am	4																								71	4	76	4	67	4	71	4
10/18/2021	9:39:07 am	4																								71	4	76	4	68	4	71	4
10/18/2021	9:39:27 am	4																								71	4	75	4	67	4	70	4
10/18/2021	9:39:47 am	4																								71	4	76	4	68	4	71	4
10/18/2021	9:40:07 am	4																								71	4	75	4	68	4	70	4
10/18/2021	9:40:27 am	4																								70	4	75	4	68	4	70	4
10/18/2021	9:40:47 am	4																								70	4	75	4	68	4	70	4
10/18/2021	9:41:07 am	4																								70	4	75	4	67	3	70	4
10/18/2021	9:41:27 am	4																								70	4	75	4	67	3	70	4
10/18/2021	9:41:47 am	4																								70	4	75	4	68	3	70	4
10/18/2021	9:42:07 am	4																								70	4	75	4	67	3	70	4
10/18/2021	9:42:27 am	4																								70	4	75	4	67	3	69	4
10/18/2021	9:42:47 am	4																								71	4	75	4	68	3	71	4
10/18/2021	9:43:07 am	4																								71	4	76	4	68	3	71	4
10/18/2021	9:43:27 am	4																								71	4	76	4	68	3	71	4
10/18/2021	9:43:47 am	4																								70	4	75	4	68	3	70	4
10/18/2021	9:44:07 am	4																								71	4	76	4	68	3	71	4
10/18/2021	9:44:27 am	4																								71	4	76	4	68	3	71	4
10/18/2021	9:44:47 am	4																								71	4	76	4	68	3	71	4
10/18/2021	9:45:07 am	4																								71	4	76	4	68	3	71	4
10/18/2021	9:45:27 am	4																								72	4	76	4	69	3	72	4
10/18/2021	9:45:47 am	4																								71	4	76	4	68	3	71	4
10/18/2021	9:46:07 am	4																								71	4	76	4	69	3	72	4
10/18/2021	9:46:27 am	4																								72	4	76	4	69	3	72	4
10/18/2021	9:46:47 am	4																								72	4	76	4	69	3	71	4
10/18/2021	9:47:07 am	4																								72	4	76	4	69	3	71	4
10/18/2021	9:47:27 am	4																								72	4	76	4	69	3	72	4
10/18/2021	9:47:47 am	4																								72	4	76	4	70	3	72	4
10/18/2021	9:48:07 am	4																								72	4	76	4	70	3	72	4
10/18/2021	9:48:27 am	4																								72	4	76	4	69	3	72	4
10/18/2021	9:48:47 am	4																								72	4	77	4	69	3	72	4
10/18/2021	9:49:07 am	4																								72	4	76	4	69	3	72	4
10/18/2021	9:49:27 am	4																								72	4	76	4	70	3	72	4
10/18/2021	9:49:47 am	4																								72	4	76	4	69	3	71	4
10/18/2021	9:50:07 am	4																								72	4	76	4	70	3	72	4
10/18/2021	9:50:27 am	4																								72	4	76	4	70	4	72	4
10/18/2021	9:50:47 am	4																								72	4	77	4	71	3	72	4
10/18/2021	9:51:07 am	4																								72	4	77	4	71	4	72	4
10/18/2021	9:51:27 am	4																								72	4	76	4	71	4	72	4
10/18/2021	9:51:47 am	4																								72	4	77	4	70	4	72	4
10/18/2021	9:52:07 am	4																								73	4	77	4	70	4	73	4
10/18/2021	9:52:27 am	4																								72	4	77	4	72	4	72	4
10/18/2021	9:52:47 am	4																								72	4	77	4	71	4	73	4
10/18/2021	9:53:07 am	4																								73	4	77	4	71	4	73	4
10/18/2021	9:53:27 am	4																								73	4	77	4	72	4	73	4
10/18/2021	9:53:47 am	4																								72	4	77	4	72	4	73	4
10/18/2021	9:54:07 am	4																								73	4	77	4	72	4	73	4
10/18/2021	9:54:27 am	4																								73	4	77	4	73	4	73	4
10/18/2021	9:54:47 am	4																								73	4	77	4	73	4	73	4
10/18/2021	9:55:07 am	4																								73	4	77	4	73	4	73	4
10/18/2021	9:55:27 am	4																								72	4	77	4	73	4	73	4
10/18/2021	9:55:47 am	4																								73	4	78	4	73	4	74	4
10/18/2021	9:56:07 am	4																								73	4	78	4	73	4	74	4
10/18/2021	9:56:27 am	4																								73	4	77	4	73	4	74	4
10/18/2021	9:56:47 am	4																								73	4	77	4	73	4	74	4
10/18/2021	9:57:07 am	4																								73	4	78	4	74	4	74	4
10/18/2021	9:57:27 am	4																								73	4	77	4	73	4	74	4
10/18/2021	9:57:47 am	4																								73	4	77	4	73	4	74	4
10/18/2021	9:58:07 am	4																								73	4	77	4	73	4	74	4
10/18/2021	9:58:27 am	4																								73	4	78	4	74	4	75	4
10/18/2021	9:58:47 am	4																								73	4	78	4	73	4	74	4
10/18/2021	9:59:07 am	4																								73	4	77	4	74	4	74	4
10/18/2021	9:59:27 am	4																								73	4	77	4	73	4	74	4
10/18/2021	9:59:47 am	4																								73	4	78	4	73	4	74	4
10/18/2021	10:00:07 am	4																								73	4	77	4	73	4	74	4
10/18/2021	10:00:27 am	4																								73	4	77	4	73	4	73	4
10/18/2021	10:00:47 am	4																								73	4	77	4	74	4	74	4
10/18/2021	10:01:07 am	4																								73	4	77	4	73	4	74	4
10/18/2021	10:01:27 am	4																								72	4	77	4	74	4	74	4
10/18/2021	10:01:47 am	4																								72	4	77	4	73	4	74	4
10/18/2021	10:02:07 am	4																								72	4	77	4	73	4	73	4
10/18/2021	10:02:27 am	4																								73	4	77	4	73	4	73	4
10/18/2021	10:02:47 am	4																								72	4	77	4	73	4	73	4
10/18/2021	10:03:07 am	4																								73	4	77	4	73	4	74	4
10/18/2021	10:03:27 am	4																								73	4	77	4	73	4	74	4
10/18/2021	10:03:47 am	4																								72	4	77	4	73	4	74	4
10/18/2021	10:04:07 am	4																								72	4	77	4	73	4	73	4
10/18/2021	10:04:27 am	4																								73	4	77	4	73	4	73	4
10/18/2021	10:04:47 am	4																								72	4	77	4	73	4	74	4
10/18/2021	10:05:07 am	4																								72	4	77	4	73	4	73	4
10/18/2021	10:05:27 am	4																								73	4	77	4	74	4	74	4
10/18/2021	10:05:47 am	4																								73	4	77	4	73	4	74	4
10/18/2021	10:06:07 am	4																								73	4	77	4	73	4	74	4
10/18/2021	10:06:27 am	4																								72	4	77	4	73	4	73	4
10/18/2021	10:06:47 am	4																								73	4	77	4	74	4	75	4
10/18/2021	10:07:07 am	4																								73	4	78	4	74	4	75	4
10/18/2021	10:07:27 am	4																								73	4	78	4	74	4	75	4
10/18/2021	10:07:47 am	4																								73	4	78	4	74	4	75	4
10/18/2021	10:08:07 am	4																								73	4	77	4	74	4	74	4
10/18/2021	10:08:27 am	4																								73	4	77	4	73	4	74	4
10/18/2021	10:08:47 am	4																								73	4	78	4	74	4	75	4
10/18/2021	10:09:07 am	4																								73	4	78	4	74	4	75	4
10/18/2021	10:09:27 am	4																								73	4	78	4	74	4	75	4
10/18/2021	10:09:47 am	4																								74	4	78	4	75	4	76	4
10/18/2021	10:10:07 am	4																								73	4	78	4	75	4	75	4
10/18/2021	10:10:27 am	4																								74	4	78	4	75	4	76	4
10/18/2021	10:10:47 am	4																								73	4	78	4	74	4	75	4
10/18/2021	10:11:07 am	4																								73	4	78	4	74	4	76	4
10/18/2021	10:11:27 am	4																								73	4	78	4	74	4	75	4
10/18/2021	10:11:47 am	4																								74	4	78	4	74	4	76	4
10/18/2021	10:12:07 am	4																								74	4	78	4	74	4	76	4
10/18/2021	10:12:27 am	4																								74	4	78	4	74	4	76	4
10/18/2021	10:12:47 am	4																								74	4	78	4	73	4	76	4
10/18/2021	10:13:07 am	4																								73	4	78	4	73	4	75	4
10/18/2021	10:13:27 am	4																								73	4	77	4	73	4	74	4
10/18/2021	10:13:47 am	4																								74	4	79	4	74	4	76	4
10/18/2021	10:14:07 am	4																								74	4	79	4	74	4	76	4
10/18/2021	10:14:27 am	4																								74	4	78	4	74	4	75	4
10/18/2021	10:14:47 am	4																								74	4	78	4	74	4	75	4
10/18/2021	10:15:07 am	4																								74	4	78	4	73	4	75	4
10/18/2021	10:15:27 am	4																								74	4	78	4	73	4	75	4
10/18/2021	10:15:47 am	4																								73	4	78	4	73	4	75	4
10/18/2021	10:16:07 am	4																								72	4	77	4	72	4	73	4
10/18/2021	10:16:27 am	4																								73	4	78	4	72	4	75	4
10/18/2021	10:16:47 am	4																								74	4	78	4	72	4	75	4
10/18/2021	10:17:07 am	4																								74	4	78	4	73	4	75	4
10/18/2021	10:17:27 am	4																								74	4	78	4	73	3	75	4
10/18/2021	10:17:47 am	4																								74	4	78	4	73	3	75	4
10/18/2021	10:18:07 am	4																								73	4	78	4	73	4	75	4
10/18/2021	10:18:27 am	4																								74	4	78	4	73	4	75	4
10/18/2021	10:18:47 am	4																								74	4	78	4	73	3	75	4
10/18/2021	10:19:07 am	4																								73	4	78	4	73	4	74	4
10/18/2021	10:19:27 am	4																								74	4	78	4	74	3	75	4
10/18/2021	10:19:47 am	4																								74	4	78	4	74	3	75	4
10/18/2021	10:20:07 am	4																								74	4	78	4	74	3	75	4
10/18/2021	10:20:27 am	4																								74	4	78	4	74	3	75	4
10/18/2021	10:20:47 am	4																								74	4	78	4	74	4	75	4
10/18/2021	10:21:07 am	4																								73	4	78	4	74	3	75	4
10/18/2021	10:21:27 am	4																								74	4	78	4	74	3	75	4
10/18/2021	10:21:47 am	4																								74	4	78	4	74	3	75	4
10/18/2021	10:22:07 am	4																								74	4	78	4	74	3	75	4
10/18/2021	10:22:27 am	4																								73	4	78	4	74	4	75	4
10/18/2021	10:22:47 am	4																								74	4	78	4	74	3	75	4
10/18/2021	10:23:07 am	4																								74	4	78	4	74	3	76	4
10/18/2021	10:23:27 am	4																								75	4	79	4	74	3	76	4
10/18/2021	10:23:47 am	4																								74	4	78	4	75	3	76	4
10/18/2021	10:24:07 am	4																								74	4	78	4	75	3	75	4
10/18/2021	10:24:27 am	4																								74	4	78	4	75	3	75	4
10/18/2021	10:24:47 am	4																								74	4	79	4	75	3	76	4
10/18/2021	10:25:07 am	4																								74	4	79	4	75	3	76	4
10/18/2021	10:25:27 am	4																								74	4	78	4	74	4	76	4
10/18/2021	10:25:47 am	4																								75	4	79	4	75	3	76	4
10/18/2021	10:26:07 am	4																								75	4	79	4	76	3	77	4
10/18/2021	10:26:27 am	4																								74	4	79	4	75	3	76	4
10/18/2021	10:26:47 am	4																								74	4	79	4	75	3	76	4
10/18/2021	10:27:07 am	4																								74	4	78	4	76	3	76	4
10/18/2021	10:27:27 am	4																								74	4	79	4	75	3	76	4
10/18/2021	10:27:47 am	4																								74	4	79	4	75	4	76	4
10/18/2021	10:28:07 am	4																								74	4	79	4	76	3	77	4
10/18/2021	10:28:27 am	4																								74	4	78	4	75	3	76	4
10/18/2021	10:28:47 am	4																								74	4	78	4	76	3	76	4
10/18/2021	10:29:07 am	4																								74	4	78	4	76	3	76	4
10/18/2021	10:29:27 am	4																								74	4	78	4	76	3	76	4
10/18/2021	10:29:47 am	4																								74	4	79	4	76	4	76	4
10/18/2021	10:30:07 am	4																								74	4	78	4	76	4	76	4
10/18/2021	10:30:27 am	4																								74	4	78	4	76	3	75	4
10/18/2021	10:30:47 am	4																								74	4	78	4	76	3	76	4
10/18/2021	10:31:07 am	4																								73	4	78	4	76	3	76	4
10/18/2021	10:31:27 am	4																								73	4	78	4	76	3	76	4
10/18/2021	10:31:47 am	4																								74	4	78	4	76	3	76	4
10/18/2021	10:32:07 am	4																								74	4	78	4	76	3	76	4
10/18/2021	10:32:27 am	4																								74	4	78	4	76	3	76	4
10/18/2021	10:32:47 am	4																								73	4	78	4	75	3	75	4
10/18/2021	10:33:07 am	4																								74	4	78	4	76	3	76	4
10/18/2021	10:33:27 am	4																								74	4	78	4	76	3	75	4
10/18/2021	10:33:47 am	4																								74	4	78	4	77	3	76	4
10/18/2021	10:34:07 am	4																								75	4	79	4	77	3	77	4
10/18/2021	10:34:27 am	4																								75	4	79	4	78	3	76	4
10/18/2021	10:34:47 am	4																								75	4	79	4	79	3	77	4
10/18/2021	10:35:07 am	4																								75	4	79	4	79	3	77	4
10/18/2021	10:35:27 am	4																								75	4	79	4	78	3	77	4
10/18/2021	10:35:47 am	4																								75	4	79	4	79	3	77	4
10/18/2021	10:36:07 am	4																								72	4	77	4	77	3	74	4
10/18/2021	10:36:27 am	4																								72	4	77	4	78	3	74	4
10/18/2021	10:36:47 am	4																								72	4	77	4	78	3	75	4
10/18/2021	10:37:07 am	4																								72	4	76	4	79	3	74	4
10/18/2021	10:37:27 am	4																								73	4	77	4	79	3	75	4
10/18/2021	10:37:47 am	4																								73	4	77	4	80	3	76	4
10/18/2021	10:38:07 am	4																								73	4	77	4	81	3	76	4
10/18/2021	10:38:27 am	4																								73	4	77	4	81	3	76	4
10/18/2021	10:38:47 am	4																								73	4	77	4	81	3	76	4
10/18/2021	10:39:07 am	4																								73	4	77	4	82	3	76	4
10/18/2021	10:39:27 am	4																								73	4	77	4	81	3	76	4
10/18/2021	10:39:47 am	4																								73	4	77	4	82	3	76	4
10/18/2021	10:40:07 am	4																								73	4	77	4	81	3	76	4
10/18/2021	10:40:27 am	4																								73	4	77	4	81	3	76	4
10/18/2021	10:40:47 am	4																								73	4	77	4	81	3	76	4
10/18/2021	10:41:07 am	4																								73	4	77	4	81	3	76	4
10/18/2021	10:41:27 am	4																								74	4	78	4	82	3	77	4
10/18/2021	10:41:47 am	4																								73	4	78	4	82	3	77	4
10/18/2021	10:42:07 am	4																								73	4	77	4	82	3	77	4
10/18/2021	10:42:27 am	4																								73	4	77	4	81	3	76	4
10/18/2021	10:42:47 am	4																								73	4	77	4	81	3	76	4
10/18/2021	10:43:07 am	4																								73	4	77	4	81	3	76	4
10/18/2021	10:43:27 am	4																								72	4	77	4	80	3	75	4
10/18/2021	10:43:47 am	4																								72	4	76	4	80	3	75	4
10/18/2021	10:44:07 am	4																								72	4	77	4	81	3	75	4
10/18/2021	10:44:27 am	4																								72	4	76	4	78	3	74	4
10/18/2021	10:44:47 am	4																								72	4	77	4	78	3	75	4
10/18/2021	10:45:07 am	4																								73	4	77	4	79	3	75	4
10/18/2021	10:45:27 am	4																								72	4	77	4	79	3	74	4
10/18/2021	10:45:47 am	4																								72	4	77	4	78	3	74	4
10/18/2021	10:46:07 am	4																								72	4	77	4	78	3	75	4
10/18/2021	10:46:27 am	4																								71	4	76	4	78	3	74	4
10/18/2021	10:46:47 am	4																								72	4	76	4	78	4	74	4
10/18/2021	10:47:07 am	4																								72	4	77	4	77	4	75	4
10/18/2021	10:47:27 am	4																								72	4	77	4	77	3	75	4
10/18/2021	10:47:47 am	4																								73	4	77	4	80	4	75	4
10/18/2021	10:48:07 am	4																								74	4	79	4	80	4	78	4
10/18/2021	10:48:27 am	4																								74	4	78	4	80	3	76	4
10/18/2021	10:48:47 am	4																								73	4	77	4	80	3	75	4
10/18/2021	10:49:07 am	4																								72	4	76	4	78	4	74	4
10/18/2021	10:49:27 am	4																								72	4	76	4	77	3	73	4
10/18/2021	10:49:47 am	4																								72	4	76	4	77	3	73	4
10/18/2021	10:50:07 am	4																								72	4	76	4	78	4	73	4
10/18/2021	10:50:27 am	4																								72	4	77	4	78	3	74	4
10/18/2021	10:50:47 am	4																								71	4	75	4	78	3	72	4
10/18/2021	10:51:07 am	4																								72	4	76	4	78	3	74	4
10/18/2021	10:51:27 am	4																								73	4	77	4	78	3	76	4
10/18/2021	10:51:47 am	4																								73	4	78	4	83	3	76	4
10/18/2021	10:52:07 am	4																								73	4	78	4	81	4	77	4
10/18/2021	10:52:27 am	4																								74	4	78	4	81	3	78	4
10/18/2021	10:52:47 am	4																								74	4	78	4	82	3	78	4
10/18/2021	10:53:07 am	4																								73	4	77	4	84	3	76	4
10/18/2021	10:53:27 am	4																								74	4	78	4	83	3	79	4
10/18/2021	10:53:47 am	4																								74	4	78	4	84	3	78	4
10/18/2021	10:54:07 am	4																								75	4	78	4	84	3	78	4

## Sheet: ID 8
Date	Time	Technology	CO	sCO	CI	sCI	SV	SVI	PR	SYSART	DIAART	MAP	SVR	SVRI	SVV	PRV	PPV	EDV	sEDV	EDVI	sEDVI	RVEF	sRVEF	ScvO₂/SvO₂	SQI	StO₂ A1	TPI A1	StO₂ A2	TPI A2	StO₂ B1	TPI B1	StO₂ B2	TPI B2
		1-F, 4-SG	L/min	L/min	L/min/m²	L/min/m²	mL/b	mL/b/m²	bpm	mmHg	mmHg	mmHg	dyne-s/cm⁵	dyne-s-m²/cm⁵	%		%	mL	mL	mL/m²	mL/m²	% EFU	% EFU	%		%		%		%		%
10/20/2021	9:13:51 am	4																									65535		65535		65535		65535
10/20/2021	9:14:11 am	4																									65535		65535		65535		65535
10/20/2021	9:14:31 am	4																									65535		65535		65535		65535
10/20/2021	9:14:51 am	4																									65535		65535		65535		65535
10/20/2021	9:15:11 am	4																								70	4	70	4	75	3	76	3
10/20/2021	9:15:31 am	4																								70	4	70	4	75	3	76	3
10/20/2021	9:15:51 am	4																								70	4	70	4	82	3	77	3
10/20/2021	9:16:11 am	4																								70	4	70	4	80	3	79	3
10/20/2021	9:16:31 am	4																								70	4	69	4	73	3	83	3
10/20/2021	9:16:51 am	4																								70	4	69	4	73	3	83	3
10/20/2021	9:17:11 am	4																								70	4	69	4	78	3	83	3
10/20/2021	9:17:31 am	4																								70	4	68	4	80	3	83	3
10/20/2021	9:17:51 am	4																								70	4	69	4	73	3	83	3
10/20/2021	9:18:11 am	4																								68	4	67	4	77	3	83	3
10/20/2021	9:18:31 am	4																								70	4	68	4	80	3	83	3
10/20/2021	9:18:51 am	4																								70	4	69	4	68	3	83	3
10/20/2021	9:19:11 am	4																								69	4	68	4	67	3	81	3
10/20/2021	9:19:31 am	4																								68	4	67	4	75	3	82	3
10/20/2021	9:19:51 am	4																								69	4	68	4	84	3	82	3
10/20/2021	9:20:11 am	4																								71	4	70	4	84	3	82	3
10/20/2021	9:20:31 am	4																								72	4	71	4	85	3	82	3
10/20/2021	9:20:51 am	4																								72	4	72	4	84	3	82	3
10/20/2021	9:21:11 am	4																								74	4	73	4	86	3	82	3
10/20/2021	9:21:31 am	4																								73	4	72	4	87	3	82	3
10/20/2021	9:21:51 am	4																								73	4	72	4	88	3	82	3
10/20/2021	9:22:11 am	4																								73	4	72	4	88	3	82	3
10/20/2021	9:22:31 am	4																								73	4	73	4	85	3	82	3
10/20/2021	9:22:51 am	4																								73	4	72	4	88	3	82	3
10/20/2021	9:23:11 am	4																								73	4	72	4	89	3	82	3
10/20/2021	9:23:31 am	4																								73	4	72	4	89	3	82	3
10/20/2021	9:23:51 am	4																								72	4	72	4	88	3	82	3
10/20/2021	9:24:11 am	4																								70	4	69	4	73	3	82	3
10/20/2021	9:24:31 am	4																								72	4	73	3	73	3	82	3
10/20/2021	9:24:51 am	4																								75	3	79	3	73	3	82	3
10/20/2021	9:25:11 am	4																								76	4	80	3	70	3	82	3
10/20/2021	9:25:31 am	4																								76	4	79	2	89	3	91	3
10/20/2021	9:25:51 am	4																								76	4	82	2	91	3	91	3
10/20/2021	9:26:11 am	4																								80	3	89	1	92	3	92	3
10/20/2021	9:26:31 am	4																								79	3	88	2	91	3	91	3
10/20/2021	9:26:51 am	4																								78	3	87	2	89	3	90	3
10/20/2021	9:27:11 am	4																								78	3	87	2	88	3	90	3
10/20/2021	9:27:31 am	4																								76	3	87	1	86	3	89	3
10/20/2021	9:27:51 am	4																								76	4	84	2	84	3	89	3
10/20/2021	9:28:11 am	4																								77	4	86	2	81	3	89	3
10/20/2021	9:28:31 am	4																								77	3	80	4	81	3	89	3
10/20/2021	9:28:51 am	4																								77	3	78	4	81	3	89	3
10/20/2021	9:29:11 am	4																								77	3	78	4	81	3	89	3
10/20/2021	9:29:31 am	4																								77	3	78	4	81	3	89	3
10/20/2021	9:29:51 am	4																								77	3	78	4	81	3	89	3
10/20/2021	9:30:11 am	4																								76	3	78	4	81	3	89	3
10/20/2021	9:30:31 am	4																								76	3	78	4	81	3	89	3
10/20/2021	9:30:51 am	4																								75	3	77	4	81	3	89	3
10/20/2021	9:31:11 am	4																								75	3	77	4	81	3	89	3
10/20/2021	9:31:31 am	4																								75	3	76	4	81	3	89	3
10/20/2021	9:31:51 am	4																								75	3	77	4	81	3	89	3
10/20/2021	9:32:11 am	4																								74	3	76	4	81	3	89	3
10/20/2021	9:32:31 am	4																								74	3	76	4	81	3	89	3
10/20/2021	9:32:51 am	4																								74	3	76	4	81	3	89	3
10/20/2021	9:33:11 am	4																								74	3	76	4	81	3	89	3
10/20/2021	9:33:31 am	4																								74	3	76	4	81	3	89	3
10/20/2021	9:33:51 am	4																								74	3	75	4	81	3	89	3
10/20/2021	9:34:11 am	4																								74	3	75	4	81	3	89	3
10/20/2021	9:34:31 am	4																								73	3	75	4	81	3	89	3
10/20/2021	9:34:51 am	4																								73	3	75	4	81	3	89	3
10/20/2021	9:35:11 am	4																								73	3	74	4	81	3	89	3
10/20/2021	9:35:31 am	4																								73	3	75	4	81	3	89	3
10/20/2021	9:35:51 am	4																								72	3	74	4	81	3	89	3
10/20/2021	9:36:11 am	4																								72	3	74	4	81	3	89	3
10/20/2021	9:36:31 am	4																								72	3	74	4	81	3	89	3
10/20/2021	9:36:51 am	4																								72	3	74	4	81	3	89	3
10/20/2021	9:37:11 am	4																								71	3	74	4	81	3	89	3
10/20/2021	9:37:31 am	4																								71	3	73	4	81	3	85	3
10/20/2021	9:37:51 am	4																								71	3	73	3	81	3	85	3
10/20/2021	9:38:11 am	4																								71	3	73	4	81	3	85	3
10/20/2021	9:38:31 am	4																								71	3	73	4	77	3	85	3
10/20/2021	9:38:51 am	4																								71	3	73	4	77	3	85	3
10/20/2021	9:39:11 am	4																								70	3	72	4	77	3	85	3
10/20/2021	9:39:31 am	4																								69	3	72	4	77	3	85	3
10/20/2021	9:39:51 am	4																								72	3	73	3	77	3	85	3
10/20/2021	9:40:11 am	4																								72	3	74	4	77	3	85	3
10/20/2021	9:40:31 am	4																								72	3	74	4	77	3	85	3
10/20/2021	9:40:51 am	4																								71	3	74	3	77	3	85	3
10/20/2021	9:41:11 am	4																								71	3	73	4	77	3	85	3
10/20/2021	9:41:31 am	4																								70	3	73	4	77	3	85	3
10/20/2021	9:41:51 am	4																								70	3	73	4	77	3	85	3
10/20/2021	9:42:11 am	4																								70	3	73	3	78	3	85	3
10/20/2021	9:42:31 am	4																								70	3	73	4	78	3	85	3
10/20/2021	9:42:51 am	4																								70	3	73	4	78	3	85	3
10/20/2021	9:43:11 am	4																								70	3	73	4	78	3	85	3
10/20/2021	9:43:31 am	4																								70	3	73	3	78	3	85	3
10/20/2021	9:43:51 am	4																								70	3	73	3	78	3	85	3
10/20/2021	9:44:11 am	4																								70	3	73	3	78	3	85	3
10/20/2021	9:44:31 am	4																								70	3	73	3	78	3	85	3
10/20/2021	9:44:51 am	4																								70	3	72	3	78	3	85	3
10/20/2021	9:45:11 am	4																								73	3	73	4	78	3	85	3
10/20/2021	9:45:31 am	4																								74	3	73	3	78	3	85	3
10/20/2021	9:45:51 am	4																								73	3	74	3	78	3	85	3
10/20/2021	9:46:11 am	4																								73	3	74	3	78	3	85	3
10/20/2021	9:46:31 am	4																								73	3	74	3	78	3	85	3
10/20/2021	9:46:51 am	4																								73	3	73	4	78	3	82	3
10/20/2021	9:47:11 am	4																								73	3	74	4	78	3	82	3
10/20/2021	9:47:31 am	4																								72	3	73	3	78	3	82	3
10/20/2021	9:47:51 am	4																								73	3	74	3	78	3	82	3
10/20/2021	9:48:11 am	4																								73	3	74	3	78	3	82	3
10/20/2021	9:48:31 am	4																								73	3	74	3	78	3	82	3
10/20/2021	9:48:51 am	4																								73	3	74	3	79	3	82	3
10/20/2021	9:49:11 am	4																								73	3	74	3	79	3	82	3
10/20/2021	9:49:31 am	4																								73	3	74	3	79	3	82	3
10/20/2021	9:49:51 am	4																								72	3	73	3	79	3	82	3
10/20/2021	9:50:11 am	4																								72	3	74	3	79	3	82	3
10/20/2021	9:50:31 am	4																								72	3	73	4	79	3	82	3
10/20/2021	9:50:51 am	4																								72	3	73	3	79	3	82	3
10/20/2021	9:51:11 am	4																								72	3	73	3	79	3	82	3
10/20/2021	9:51:31 am	4																								72	3	72	4	79	3	82	3
10/20/2021	9:51:51 am	4																								73	3	73	4	79	3	82	3
10/20/2021	9:52:11 am	4																								74	3	72	4	79	3	82	3
10/20/2021	9:52:31 am	4																								73	3	71	4	79	3	82	3
10/20/2021	9:52:51 am	4																								73	3	72	4	79	3	82	3
10/20/2021	9:53:11 am	4																								73	3	71	4	79	3	82	3
10/20/2021	9:53:31 am	4																								74	3	73	4	79	3	82	3
10/20/2021	9:53:51 am	4																								74	3	73	4	79	3	82	3
10/20/2021	9:54:11 am	4																								73	3	72	4	79	3	82	3
10/20/2021	9:54:31 am	4																								73	3	72	4	79	3	82	3
10/20/2021	9:54:51 am	4																								72	3	73	4	79	3	82	3
10/20/2021	9:55:11 am	4																								72	3	72	4	79	3	82	3
10/20/2021	9:55:31 am	4																								72	3	72	4	79	3	82	3
10/20/2021	9:55:51 am	4																								72	3	72	4	79	3	82	3
10/20/2021	9:56:11 am	4																								74	3	74	3	79	3	82	3
10/20/2021	9:56:31 am	4																								74	3	73	4	79	3	82	3
10/20/2021	9:56:51 am	4																								73	3	73	3	79	3	82	3
10/20/2021	9:57:11 am	4																								72	4	73	3	79	3	82	3
10/20/2021	9:57:31 am	4																								73	3	72	4	79	3	82	3
10/20/2021	9:57:51 am	4																								71	3	72	4	79	3	82	3
10/20/2021	9:58:11 am	4																								71	4	72	4	79	3	82	3
10/20/2021	9:58:31 am	4																								69	1	75	4	79	3	78	3
10/20/2021	9:58:51 am	4																								62	0	67	4	79	3	78	3
10/20/2021	9:59:11 am	4																								62	1	67	4	79	3	78	3
10/20/2021	9:59:31 am	4																								56	1	67	4	79	3	78	3
10/20/2021	9:59:51 am	4																								71	3	67	3	79	3	78	3
10/20/2021	10:00:11 am	4																								69	4	67	3	79	3	78	3
10/20/2021	10:00:31 am	4																								67	3	67	3	79	3	78	3
10/20/2021	10:00:51 am	4																								59	2	67	3	79	3	72	3
10/20/2021	10:01:11 am	4																								59	4	67	3	79	3	72	3
10/20/2021	10:01:31 am	4																								55	4	67	3	79	3	72	3
10/20/2021	10:01:51 am	4																								68	3	67	3	79	3	72	3
10/20/2021	10:02:11 am	4																								60	4	67	3	79	3	72	3
10/20/2021	10:02:31 am	4																								56	3	67	3	79	3	72	3
10/20/2021	10:02:51 am	4																								70	4	67	3	79	3	72	3
10/20/2021	10:03:11 am	4																								70	4	67	3	79	3	76	3
10/20/2021	10:03:31 am	4																								70	1	67	3	78	3	76	3
10/20/2021	10:03:51 am	4																								70	4	67	3	78	3	76	3
10/20/2021	10:04:11 am	4																								70	1	67	3	78	3	76	3
10/20/2021	10:04:31 am	4																								70	1	67	3	78	3	76	3
10/20/2021	10:04:51 am	4																								70	4	67	3	78	3	76	3
10/20/2021	10:05:11 am	4																								70	1	67	3	78	3	76	3
10/20/2021	10:05:31 am	4																								70	1	67	3	78	3	76	3
10/20/2021	10:05:51 am	4																								70	4	67	3	78	3	76	3
10/20/2021	10:06:11 am	4																								70	1	67	3	78	3	76	3
10/20/2021	10:06:31 am	4																								70	1	67	3	78	3	76	3
10/20/2021	10:06:51 am	4																								61	3	67	3	72	3	76	3
10/20/2021	10:07:11 am	4																								64	3	67	3	72	3	76	3
10/20/2021	10:07:31 am	4																								65	3	67	3	72	3	76	3
10/20/2021	10:07:51 am	4																								63	4	67	3	72	3	76	3
10/20/2021	10:08:11 am	4																								67	2	67	3	72	3	76	3
10/20/2021	10:08:31 am	4																								58	1	67	4	72	3	76	3
10/20/2021	10:08:51 am	4																								61	2	67	3	72	3	76	3
10/20/2021	10:09:11 am	4																								66	1	67	3	72	3	76	3
10/20/2021	10:09:31 am	4																								66	1	67	3	72	3	76	3
10/20/2021	10:09:51 am	4																								75	1	67	3	72	3	76	3
10/20/2021	10:10:11 am	4																								61	1	67	3	72	3	76	3
10/20/2021	10:10:31 am	4																								67	3	67	4	72	3	76	3
10/20/2021	10:10:51 am	4																								71	3	67	4	78	3	76	3
10/20/2021	10:11:11 am	4																								70	3	67	4	78	3	76	3
10/20/2021	10:11:31 am	4																								70	4	67	4	78	3	76	3
10/20/2021	10:11:51 am	4																								70	4	67	4	78	3	76	3
10/20/2021	10:12:11 am	4																								70	4	68	4	78	3	76	3
10/20/2021	10:12:31 am	4																								70	4	67	4	78	3	76	3
10/20/2021	10:12:51 am	4																								70	4	67	4	78	3	74	3
10/20/2021	10:13:11 am	4																								71	4	68	4	78	3	74	3
10/20/2021	10:13:31 am	4																								71	4	67	4	78	3	74	3
10/20/2021	10:13:51 am	4																								71	4	68	4	78	3	74	3
10/20/2021	10:14:11 am	4																								71	4	68	4	78	3	74	3
10/20/2021	10:14:31 am	4																								70	4	68	4	78	3	74	3
10/20/2021	10:14:51 am	4																								70	4	68	4	78	3	74	3
10/20/2021	10:15:11 am	4																								70	4	69	4	78	3	74	3
10/20/2021	10:15:31 am	4																								69	4	70	4	78	3	74	3
10/20/2021	10:15:51 am	4																								69	4	69	4	78	3	74	3
10/20/2021	10:16:11 am	4																								69	4	68	4	78	3	74	3
10/20/2021	10:16:31 am	4																								69	4	69	4	78	3	74	3
10/20/2021	10:16:51 am	4																								70	4	69	4	78	3	74	3
10/20/2021	10:17:11 am	4																								70	4	69	4	78	3	74	3
10/20/2021	10:17:31 am	4																								70	4	69	4	78	3	74	3
10/20/2021	10:17:51 am	4																								70	3	69	4	78	3	74	3
10/20/2021	10:18:11 am	4																								70	3	69	4	78	3	74	3
10/20/2021	10:18:31 am	4																								70	4	69	4	78	3	74	3
10/20/2021	10:18:51 am	4																								71	3	69	4	78	3	74	3
10/20/2021	10:19:11 am	4																								71	3	69	4	78	3	74	3
10/20/2021	10:19:31 am	4																								70	4	70	4	78	3	78	3
10/20/2021	10:19:51 am	4																								70	4	71	4	78	3	78	3
10/20/2021	10:20:11 am	4																								69	3	70	4	76	3	78	3
10/20/2021	10:20:31 am	4																								69	3	71	4	76	3	78	3
10/20/2021	10:20:51 am	4																								69	3	70	4	76	3	78	3
10/20/2021	10:21:11 am	4																								70	3	70	4	76	3	78	3
10/20/2021	10:21:31 am	4																								71	3	70	4	76	3	78	3
10/20/2021	10:21:51 am	4																								71	3	70	4	76	3	78	3
10/20/2021	10:22:11 am	4																								71	4	71	4	76	3	78	3
10/20/2021	10:22:31 am	4																								70	4	71	4	76	3	78	3
10/20/2021	10:22:51 am	4																								70	4	71	4	76	3	78	3
10/20/2021	10:23:11 am	4																								70	4	72	4	76	3	78	3
10/20/2021	10:23:31 am	4																								70	4	73	4	76	3	78	3
10/20/2021	10:23:51 am	4																								70	4	73	4	76	3	78	3
10/20/2021	10:24:11 am	4																								70	4	72	4	76	3	78	3
10/20/2021	10:24:31 am	4																								70	3	72	4	76	3	78	3
10/20/2021	10:24:51 am	4																								69	3	73	4	74	3	78	3
10/20/2021	10:25:11 am	4																								68	4	71	4	74	3	78	3
10/20/2021	10:25:31 am	4																								67	3	70	4	74	3	78	3
10/20/2021	10:25:51 am	4																								68	4	70	4	74	3	78	3
10/20/2021	10:26:11 am	4																								69	3	68	4	74	3	76	3
10/20/2021	10:26:31 am	4																								69	4	68	4	74	3	76	3
10/20/2021	10:26:51 am	4																								69	3	68	4	74	3	76	3
10/20/2021	10:27:11 am	4																								69	3	68	4	74	3	76	3
10/20/2021	10:27:31 am	4																								69	3	68	4	74	3	76	3
10/20/2021	10:27:51 am	4																								69	4	68	4	74	3	76	3
10/20/2021	10:28:11 am	4																								69	4	68	4	74	3	76	3
10/20/2021	10:28:31 am	4																								69	3	70	4	74	3	76	3
10/20/2021	10:28:51 am	4																								68	3	69	4	74	3	76	3
10/20/2021	10:29:11 am	4																								68	3	69	4	74	3	76	3
10/20/2021	10:29:31 am	4																								67	3	68	4	74	3	76	3
10/20/2021	10:29:51 am	4																								67	3	67	4	74	3	76	3
10/20/2021	10:30:11 am	4																								68	3	66	4	74	3	76	3
10/20/2021	10:30:31 am	4																								69	3	66	4	74	3	76	3
10/20/2021	10:30:51 am	4																								69	3	67	4	74	3	76	3
10/20/2021	10:31:11 am	4																								69	4	68	4	74	3	76	3
10/20/2021	10:31:31 am	4																								68	4	69	4	74	3	76	3
10/20/2021	10:31:51 am	4																								68	4	70	4	74	3	76	3
10/20/2021	10:32:11 am	4																								68	3	70	4	74	3	76	3
10/20/2021	10:32:31 am	4																								68	3	70	4	74	3	76	3
10/20/2021	10:32:51 am	4																								68	3	69	4	74	3	74	3
10/20/2021	10:33:11 am	4																								68	3	68	4	74	3	74	3
10/20/2021	10:33:31 am	4																								68	4	67	4	74	3	74	3
10/20/2021	10:33:51 am	4																								67	3	67	4	74	3	74	3
10/20/2021	10:34:11 am	4																								67	3	67	4	74	3	74	3
10/20/2021	10:34:31 am	4																								67	3	67	4	74	3	74	3
10/20/2021	10:34:51 am	4																								67	3	66	4	74	3	74	3
10/20/2021	10:35:11 am	4																								69	4	66	4	74	3	74	3
10/20/2021	10:35:31 am	4																								69	4	67	4	74	3	74	3
10/20/2021	10:35:51 am	4																								68	4	68	4	74	3	74	3
10/20/2021	10:36:11 am	4																								68	4	69	4	73	3	74	3
10/20/2021	10:36:31 am	4																								67	4	69	4	73	3	74	3
10/20/2021	10:36:51 am	4																								67	3	69	4	73	3	74	3
10/20/2021	10:37:11 am	4																								67	3	68	4	73	3	74	3
10/20/2021	10:37:31 am	4																								68	3	67	4	73	3	74	3
10/20/2021	10:37:51 am	4																								68	3	66	4	73	3	74	3
10/20/2021	10:38:11 am	4																								66	3	65	4	73	3	74	3
10/20/2021	10:38:31 am	4																								65	4	64	4	73	3	74	3
10/20/2021	10:38:51 am	4																								65	4	66	4	73	3	74	3
10/20/2021	10:39:11 am	4																								66	4	66	4	73	3	74	3
10/20/2021	10:39:31 am	4																								66	3	67	4	73	3	74	3
10/20/2021	10:39:51 am	4																								67	3	67	4	73	3	74	3
10/20/2021	10:40:11 am	4																								67	3	68	4	73	3	74	3
10/20/2021	10:40:31 am	4																								67	3	68	4	73	3	74	3
10/20/2021	10:40:51 am	4																								66	3	68	4	73	3	74	3
10/20/2021	10:41:11 am	4																								66	3	68	4	73	3	74	3
10/20/2021	10:41:31 am	4																								66	3	67	4	73	3	74	3
10/20/2021	10:41:51 am	4																								68	3	67	4	73	3	74	3
10/20/2021	10:42:11 am	4																								68	3	68	4	73	3	74	3
10/20/2021	10:42:31 am	4																								67	3	68	4	73	3	74	3
10/20/2021	10:42:51 am	4																								67	4	68	4	73	3	74	3
10/20/2021	10:43:11 am	4																								68	4	68	4	73	3	74	3
10/20/2021	10:43:31 am	4																								67	3	69	4	73	3	73	3
10/20/2021	10:43:51 am	4																								67	3	69	4	72	3	73	3
10/20/2021	10:44:11 am	4																								67	3	68	4	72	3	73	3
10/20/2021	10:44:31 am	4																								66	3	68	4	72	3	73	3
10/20/2021	10:44:51 am	4																								66	3	68	4	72	3	73	3
10/20/2021	10:45:11 am	4																								66	3	67	4	72	3	73	3
10/20/2021	10:45:31 am	4																								66	3	67	4	72	3	73	3
10/20/2021	10:45:51 am	4																								67	3	67	4	72	3	73	3
10/20/2021	10:46:11 am	4																								67	3	67	4	72	3	73	3
10/20/2021	10:46:31 am	4																								67	4	67	4	72	3	73	3
10/20/2021	10:46:51 am	4																								66	3	67	4	72	3	73	3
10/20/2021	10:47:11 am	4																								67	3	67	4	72	3	73	3
10/20/2021	10:47:31 am	4																								67	3	68	4	72	3	73	3
10/20/2021	10:47:51 am	4																								67	3	68	4	72	3	73	3
10/20/2021	10:48:11 am	4																								66	3	66	4	72	3	73	3
10/20/2021	10:48:31 am	4																								66	3	65	4	72	3	73	3
10/20/2021	10:48:51 am	4																								68	3	65	4	72	3	73	3
10/20/2021	10:49:11 am	4																								69	3	68	4	72	3	73	3
10/20/2021	10:49:31 am	4																								70	3	68	4	72	3	73	3
10/20/2021	10:49:51 am	4																								69	3	69	4	72	3	73	3
10/20/2021	10:50:11 am	4																								69	3	69	4	72	3	73	3
10/20/2021	10:50:31 am	4																								69	3	69	4	72	3	73	3
10/20/2021	10:50:51 am	4																								69	3	69	4	72	3	73	3
10/20/2021	10:51:11 am	4																								69	3	70	4	72	3	73	3
10/20/2021	10:51:31 am	4																								68	4	69	4	72	3	73	3
10/20/2021	10:51:51 am	4																								68	3	69	4	72	3	73	3
10/20/2021	10:52:11 am	4																								68	3	69	4	72	3	73	3
10/20/2021	10:52:31 am	4																								70	3	68	4	72	3	73	3
10/20/2021	10:52:51 am	4																								70	3	68	4	72	3	73	3
10/20/2021	10:53:11 am	4																								70	3	68	4	72	3	73	3
10/20/2021	10:53:31 am	4																								70	4	68	4	72	3	73	3
10/20/2021	10:53:51 am	4																								70	4	69	4	72	3	73	3
10/20/2021	10:54:11 am	4																								70	3	69	4	72	3	73	3
10/20/2021	10:54:31 am	4																								70	3	70	4	72	3	73	3
10/20/2021	10:54:51 am	4																								69	3	69	4	72	3	73	3
10/20/2021	10:55:11 am	4																								69	4	68	4	72	3	73	3
10/20/2021	10:55:31 am	4																								70	3	69	4	72	3	73	3
10/20/2021	10:55:51 am	4																								70	3	68	4	72	3	73	3
10/20/2021	10:56:11 am	4																								71	3	70	4	72	3	73	3
10/20/2021	10:56:31 am	4																								71	3	70	4	72	3	73	3
10/20/2021	10:56:51 am	4																								69	4	71	4	72	3	73	3
10/20/2021	10:57:11 am	4																								69	4	71	4	72	3	73	3
10/20/2021	10:57:31 am	4																								71	4	74	4	72	3	73	3
10/20/2021	10:57:51 am	4																								72	4	75	4	72	3	73	3
10/20/2021	10:58:11 am	4																								73	4	76	4	71	3	73	3
10/20/2021	10:58:31 am	4																								74	4	77	4	74	3	73	3
10/20/2021	10:58:51 am	4																								74	4	77	4	76	3	73	3
10/20/2021	10:59:11 am	4																								74	4	76	4	76	3	73	3
10/20/2021	10:59:31 am	4																								74	4	76	4	74	3	73	3
10/20/2021	10:59:51 am	4																								75	4	76	4	70	3	73	3
10/20/2021	11:00:11 am	4																								74	4	75	4	70	3	73	3
10/20/2021	11:00:31 am	4																								74	4	74	4	66	3	70	3
10/20/2021	11:00:51 am	4																								73	4	73	4	66	3	70	3
10/20/2021	11:01:11 am	4																								74	4	74	4	66	3	70	3
10/20/2021	11:01:31 am	4																								73	4	74	4	66	3	70	3
10/20/2021	11:01:51 am	4																								73	4	73	4	66	3	70	3
10/20/2021	11:02:11 am	4																								73	4	73	4	66	3	70	3
10/20/2021	11:02:31 am	4																								72	4	73	4	66	3	70	3
10/20/2021	11:02:51 am	4																								72	4	73	4	66	3	70	3
10/20/2021	11:03:11 am	4																								72	4	73	4	62	3	70	3
10/20/2021	11:03:31 am	4																								71	4	72	4	63	3	70	3
10/20/2021	11:03:51 am	4																								72	4	72	4	64	3	70	3
10/20/2021	11:04:11 am	4																								71	4	72	4	64	3	70	3
10/20/2021	11:04:31 am	4																								70	4	71	4	64	3	70	3
10/20/2021	11:04:51 am	4																								70	4	71	4	64	3	70	3
10/20/2021	11:05:11 am	4																								70	4	70	4	64	3	70	3
10/20/2021	11:05:31 am	4																								69	4	69	4	64	3	70	3
10/20/2021	11:05:51 am	4																								70	4	71	4	64	3	66	3
10/20/2021	11:06:11 am	4																								69	4	71	4	64	3	66	3
10/20/2021	11:06:31 am	4																								70	4	71	4	64	3	66	3
10/20/2021	11:06:51 am	4																								68	4	69	4	64	3	66	3
10/20/2021	11:07:11 am	4																								69	4	70	4	64	3	66	3
10/20/2021	11:07:31 am	4																								70	4	70	4	64	3	66	3
10/20/2021	11:07:51 am	4																								69	4	69	4	64	3	66	3
10/20/2021	11:08:11 am	4																								70	4	69	4	64	3	66	3
10/20/2021	11:08:31 am	4																								69	4	69	4	64	3	66	3
10/20/2021	11:08:51 am	4																								69	4	69	4	64	3	66	3
10/20/2021	11:09:11 am	4																								68	4	69	4	64	3	66	3
10/20/2021	11:09:31 am	4																								68	4	69	4	64	3	66	3
10/20/2021	11:09:51 am	4																								68	4	70	4	64	3	66	3
10/20/2021	11:10:11 am	4																								67	4	68	4	64	3	66	3
10/20/2021	11:10:31 am	4																								69	4	68	4	64	3	66	3
10/20/2021	11:10:51 am	4																								70	4	70	4	64	3	66	3
10/20/2021	11:11:11 am	4																								70	4	70	4	64	3	66	3
10/20/2021	11:11:31 am	4																								70	4	71	4	64	3	66	3
10/20/2021	11:11:51 am	4																								69	4	69	4	64	3	66	3
10/20/2021	11:12:11 am	4																								70	4	70	4	64	3	66	3
10/20/2021	11:12:31 am	4																								69	4	70	4	64	3	66	3
10/20/2021	11:12:51 am	4																								69	4	69	4	64	3	66	3
10/20/2021	11:13:11 am	4																								69	4	69	4	64	3	66	3
10/20/2021	11:13:31 am	4																								69	4	68	4	64	3	66	3
10/20/2021	11:13:51 am	4																								67	4	67	4	64	3	66	3
10/20/2021	11:14:11 am	4																								68	4	69	4	64	3	66	3
10/20/2021	11:14:31 am	4																								68	4	68	4	64	3	66	3
10/20/2021	11:14:51 am	4																								68	4	69	4	64	3	66	3
10/20/2021	11:15:11 am	4																								67	4	69	4	64	3	66	3
10/20/2021	11:15:31 am	4																								67	4	68	4	64	3	66	3
10/20/2021	11:15:51 am	4																								67	4	67	4	64	3	66	3
10/20/2021	11:16:11 am	4																								68	4	68	4	60	3	62	3
10/20/2021	11:16:31 am	4																								67	4	67	4	60	3	62	3
10/20/2021	11:16:51 am	4																								67	4	68	4	60	3	62	3
10/20/2021	11:17:11 am	4																								67	4	69	4	60	3	62	3
10/20/2021	11:17:31 am	4																								68	4	69	4	60	3	62	3
10/20/2021	11:17:51 am	4																								67	4	69	4	60	3	62	3
10/20/2021	11:18:11 am	4																								67	4	68	4	60	3	62	3
10/20/2021	11:18:31 am	4																								67	4	69	4	60	3	62	3
10/20/2021	11:18:51 am	4																								67	4	68	4	60	3	62	3
10/20/2021	11:19:11 am	4																								67	4	68	4	60	3	62	3
10/20/2021	11:19:31 am	4																								67	4	68	4	60	3	62	3
10/20/2021	11:19:51 am	4																								66	4	68	4	60	3	62	3
10/20/2021	11:20:11 am	4																								67	4	68	4	60	3	62	3
10/20/2021	11:20:31 am	4																								67	4	68	4	60	3	62	3
10/20/2021	11:20:51 am	4																								67	4	68	4	60	3	62	3
10/20/2021	11:21:11 am	4																								67	4	68	4	60	3	62	3
10/20/2021	11:21:31 am	4																								67	4	68	4	60	3	62	3
10/20/2021	11:21:51 am	4																								67	4	68	4	60	3	62	3
10/20/2021	11:22:11 am	4																								67	4	68	4	60	3	62	3
10/20/2021	11:22:31 am	4																								67	4	69	4	60	3	62	3
10/20/2021	11:22:51 am	4																								67	4	68	4	60	3	62	3
10/20/2021	11:23:11 am	4																								67	4	69	4	60	3	62	3
10/20/2021	11:23:31 am	4																								66	4	67	4	60	3	62	3
10/20/2021	11:23:51 am	4																								67	4	68	4	60	3	62	3
10/20/2021	11:24:11 am	4																								67	4	68	4	60	3	62	3
10/20/2021	11:24:31 am	4																								66	4	67	4	60	3	62	3
10/20/2021	11:24:51 am	4																								67	4	69	4	60	3	62	3
10/20/2021	11:25:11 am	4																								67	4	68	4	60	3	62	3
10/20/2021	11:25:31 am	4																								67	4	68	4	60	3	62	3
10/20/2021	11:25:51 am	4																								68	4	69	4	60	3	62	3
10/20/2021	11:26:11 am	4																								67	4	67	4	60	3	62	3
10/20/2021	11:26:31 am	4																								67	4	68	4	60	3	62	3
10/20/2021	11:26:51 am	4																								67	4	67	4	60	3	62	3
10/20/2021	11:27:11 am	4																								69	4	69	4	61	3	62	3
10/20/2021	11:27:31 am	4																								70	4	71	4	66	3	67	3
10/20/2021	11:27:51 am	4																								71	4	72	4	64	3	67	3
10/20/2021	11:28:11 am	4																								71	4	72	4	64	3	67	3
10/20/2021	11:28:31 am	4																								72	4	71	4	64	3	67	3
10/20/2021	11:28:51 am	4																								72	4	70	4	64	3	67	3
10/20/2021	11:29:11 am	4																								72	4	70	4	64	3	67	3
10/20/2021	11:29:31 am	4																								72	4	71	4	64	3	67	3
10/20/2021	11:29:51 am	4																								72	4	71	4	64	3	67	3
10/20/2021	11:30:11 am	4																								72	4	72	4	64	3	67	3
10/20/2021	11:30:31 am	4																								72	4	72	4	64	3	67	3
10/20/2021	11:30:51 am	4																								71	4	71	4	64	3	67	3
10/20/2021	11:31:11 am	4																								70	4	70	4	64	3	67	3
10/20/2021	11:31:31 am	4																								71	4	71	4	70	3	69	3
10/20/2021	11:31:51 am	4																								71	4	71	4	71	3	69	3
10/20/2021	11:32:11 am	4																								70	4	70	4	73	3	69	3
10/20/2021	11:32:31 am	4																								70	4	70	4	73	3	69	3
10/20/2021	11:32:51 am	4																								71	4	72	4	75	3	69	3
10/20/2021	11:33:11 am	4																								71	4	72	4	74	3	69	3
10/20/2021	11:33:31 am	4																								71	4	72	4	74	3	69	3
10/20/2021	11:33:51 am	4																								71	4	73	4	72	3	69	3
10/20/2021	11:34:11 am	4																								71	4	73	4	70	3	69	3
10/20/2021	11:34:31 am	4																								71	4	72	4	69	3	69	3
10/20/2021	11:34:51 am	4																								71	4	72	4	66	3	69	3
10/20/2021	11:35:11 am	4																								71	4	72	4	65	3	66	3
10/20/2021	11:35:31 am	4																								71	4	71	4	65	3	66	3
10/20/2021	11:35:51 am	4																								71	4	71	4	66	3	66	3
10/20/2021	11:36:11 am	4																								71	4	70	4	66	3	66	3
10/20/2021	11:36:31 am	4																								72	4	70	4	67	3	66	3
10/20/2021	11:36:51 am	4																								72	4	70	4	66	3	66	3
10/20/2021	11:37:11 am	4																								71	4	71	4	65	3	66	3
10/20/2021	11:37:31 am	4																								71	4	71	4	64	3	66	3
10/20/2021	11:37:51 am	4																								70	4	71	4	62	3	66	3
10/20/2021	11:38:11 am	4																								70	4	70	4	60	3	64	3
10/20/2021	11:38:31 am	4																								69	4	70	4	60	3	64	3
10/20/2021	11:38:51 am	4																								70	4	71	4	60	3	64	3
10/20/2021	11:39:11 am	4																								70	4	71	4	60	3	64	3
10/20/2021	11:39:31 am	4																								70	4	71	4	60	3	64	3
10/20/2021	11:39:51 am	4																								70	4	70	4	60	3	64	3
10/20/2021	11:40:11 am	4																								70	4	71	4	60	3	64	3
10/20/2021	11:40:31 am	4																								70	4	70	4	60	3	64	3
10/20/2021	11:40:51 am	4																								70	4	70	4	60	3	64	3
10/20/2021	11:41:11 am	4																								70	4	70	4	60	3	64	3
10/20/2021	11:41:31 am	4																								70	4	70	4	60	3	64	3
10/20/2021	11:41:51 am	4																								70	4	70	4	60	3	64	3
10/20/2021	11:42:11 am	4																								70	4	70	4	60	3	64	3
10/20/2021	11:42:31 am	4																								69	4	70	4	60	3	64	3
10/20/2021	11:42:51 am	4																								69	4	70	4	60	3	64	3
10/20/2021	11:43:11 am	4																								69	4	70	4	60	3	64	3
10/20/2021	11:43:31 am	4																								69	4	70	4	60	3	64	3
10/20/2021	11:43:51 am	4																								69	4	70	4	60	3	64	3
10/20/2021	11:44:11 am	4																								68	4	69	4	60	3	64	3
10/20/2021	11:44:31 am	4																								68	4	69	4	60	3	64	3
10/20/2021	11:44:51 am	4																								68	4	69	4	60	3	64	3
10/20/2021	11:45:11 am	4																								68	4	69	4	60	3	64	3
10/20/2021	11:45:31 am	4																								68	4	69	4	60	3	64	3
10/20/2021	11:45:51 am	4																								68	4	68	4	60	3	64	3
10/20/2021	11:46:11 am	4																								68	4	68	4	60	3	64	3
10/20/2021	11:46:31 am	4																								67	4	68	4	60	3	64	3
10/20/2021	11:46:51 am	4																								67	4	68	4	60	3	64	3
10/20/2021	11:47:11 am	4																								67	4	68	4	60	3	64	3
10/20/2021	11:47:31 am	4																								67	4	68	4	60	3	64	3
10/20/2021	11:47:51 am	4																								67	4	68	4	60	3	64	3
10/20/2021	11:48:11 am	4																								67	4	68	4	60	3	64	3
10/20/2021	11:48:31 am	4																								67	4	68	4	60	3	64	3
10/20/2021	11:48:51 am	4																								67	4	68	4	62	3	64	3
10/20/2021	11:49:11 am	4																								66	4	67	4	62	3	64	3
10/20/2021	11:49:31 am	4																								67	4	67	4	62	3	64	3
10/20/2021	11:49:51 am	4																								66	4	67	4	62	3	64	3
10/20/2021	11:50:11 am	4																								66	4	67	4	62	3	64	3
10/20/2021	11:50:31 am	4																								66	4	67	4	62	3	64	3
10/20/2021	11:50:51 am	4																								66	4	67	4	62	3	64	3
10/20/2021	11:51:11 am	4																								66	4	67	4	62	3	64	3
10/20/2021	11:51:31 am	4																								66	4	67	4	62	3	64	3
10/20/2021	11:51:51 am	4																								66	4	67	4	62	3	64	3
10/20/2021	11:52:11 am	4																								66	4	66	4	62	3	64	3
10/20/2021	11:52:31 am	4																								65	4	66	4	60	3	64	3
10/20/2021	11:52:51 am	4																								65	4	66	4	60	3	64	3
10/20/2021	11:53:11 am	4																								65	4	66	4	60	3	64	3
10/20/2021	11:53:31 am	4																								65	4	65	4	60	3	64	3
10/20/2021	11:53:51 am	4																								65	4	66	4	60	3	64	3
10/20/2021	11:54:11 am	4																								65	4	65	4	60	3	64	3
10/20/2021	11:54:31 am	4																								65	4	66	4	60	3	64	3
10/20/2021	11:54:51 am	4																								65	4	65	4	60	3	64	3
10/20/2021	11:55:11 am	4																								65	4	65	4	60	3	64	3
10/20/2021	11:55:31 am	4																								65	4	65	4	60	3	64	3
10/20/2021	11:55:51 am	4																								65	4	65	4	60	3	64	3
10/20/2021	11:56:11 am	4																								64	4	65	4	60	3	64	3
10/20/2021	11:56:31 am	4																								65	4	65	4	60	3	64	3
10/20/2021	11:56:51 am	4																								64	4	64	4	60	3	64	3
10/20/2021	11:57:11 am	4																								64	4	65	4	60	3	64	3
10/20/2021	11:57:31 am	4																								64	4	64	4	60	3	64	3
10/20/2021	11:57:51 am	4																								64	4	64	4	60	3	64	3
10/20/2021	11:58:11 am	4																								64	4	65	4	60	3	64	3
10/20/2021	11:58:31 am	4																								63	4	64	4	60	3	64	3
10/20/2021	11:58:51 am	4																								64	4	64	4	58	3	60	3
10/20/2021	11:59:11 am	4																								63	4	64	4	58	3	60	3
10/20/2021	11:59:31 am	4																								63	4	63	4	58	3	60	3
10/20/2021	11:59:51 am	4																								63	4	64	4	58	3	60	3
10/20/2021	12:00:11 pm	4																								63	4	63	4	58	3	60	3
10/20/2021	12:00:31 pm	4																								63	4	63	4	58	3	60	3
10/20/2021	12:00:51 pm	4																								62	4	63	4	58	3	60	3
10/20/2021	12:01:11 pm	4																								63	4	64	4	58	3	60	3
10/20/2021	12:01:31 pm	4																								63	4	63	4	58	3	60	3
10/20/2021	12:01:51 pm	4																								62	4	63	4	58	3	60	3
10/20/2021	12:02:11 pm	4																								62	4	63	4	58	3	60	3
10/20/2021	12:02:31 pm	4																								62	4	63	4	58	3	60	3
10/20/2021	12:02:51 pm	4																								62	4	63	4	58	3	60	3
10/20/2021	12:03:11 pm	4																								62	4	63	4	58	3	60	3
10/20/2021	12:03:31 pm	4																								62	4	63	4	58	3	60	3
10/20/2021	12:03:51 pm	4																								62	4	63	4	58	3	60	3
10/20/2021	12:04:11 pm	4																								61	4	63	4	58	3	60	3
10/20/2021	12:04:31 pm	4																								62	4	63	4	58	3	60	3
10/20/2021	12:04:51 pm	4																								62	4	63	4	58	3	60	3
10/20/2021	12:05:11 pm	4																								62	4	62	4	58	3	60	3
10/20/2021	12:05:31 pm	4																								62	4	63	4	58	3	60	3
10/20/2021	12:05:51 pm	4																								62	4	63	4	58	3	60	3
10/20/2021	12:06:11 pm	4																								61	4	63	4	56	3	60	3
10/20/2021	12:06:31 pm	4																								61	4	63	4	56	3	60	3
10/20/2021	12:06:51 pm	4																								62	4	63	4	56	3	60	3
10/20/2021	12:07:11 pm	4																								62	4	63	4	56	3	60	3
10/20/2021	12:07:31 pm	4																								62	4	63	4	56	3	60	3
10/20/2021	12:07:51 pm	4																								61	4	62	4	56	3	60	3
10/20/2021	12:08:11 pm	4																								62	4	62	4	56	3	60	3
10/20/2021	12:08:31 pm	4																								62	4	62	4	56	3	60	3
10/20/2021	12:08:51 pm	4																								62	4	63	4	56	3	60	3
10/20/2021	12:09:11 pm	4																								62	4	62	4	56	3	60	3
10/20/2021	12:09:31 pm	4																								62	4	63	4	56	3	60	3
10/20/2021	12:09:51 pm	4																								62	4	62	4	56	3	60	3
10/20/2021	12:10:11 pm	4																								62	4	63	4	56	3	60	3
10/20/2021	12:10:31 pm	4																								62	4	63	4	56	3	60	3
10/20/2021	12:10:51 pm	4																								62	4	63	4	56	3	60	3
10/20/2021	12:11:11 pm	4																								61	4	62	4	56	3	60	3
10/20/2021	12:11:31 pm	4																								62	4	63	4	58	3	60	3
10/20/2021	12:11:51 pm	4																								62	4	63	4	58	3	60	3
10/20/2021	12:12:11 pm	4																								62	4	63	4	58	3	60	3
10/20/2021	12:12:31 pm	4																								62	4	63	4	58	3	60	3
10/20/2021	12:12:51 pm	4																								62	4	63	4	58	3	60	3
10/20/2021	12:13:11 pm	4																								62	4	64	4	58	3	60	3
10/20/2021	12:13:31 pm	4																								62	4	63	4	58	3	60	3
10/20/2021	12:13:51 pm	4																								62	4	63	4	58	3	60	3
10/20/2021	12:14:11 pm	4																								62	4	63	4	58	3	60	3
10/20/2021	12:14:31 pm	4																								62	4	63	4	58	3	60	3
10/20/2021	12:14:51 pm	4																								63	4	63	4	58	3	60	3
10/20/2021	12:15:11 pm	4																								62	4	63	4	58	3	60	3
10/20/2021	12:15:31 pm	4																								62	4	63	4	58	3	60	3
10/20/2021	12:15:51 pm	4																								63	4	64	4	58	3	60	3
10/20/2021	12:16:11 pm	4																								63	4	64	4	58	3	60	3
10/20/2021	12:16:31 pm	4																								63	4	63	4	58	3	60	3
10/20/2021	12:16:51 pm	4																								63	4	64	4	58	3	60	3
10/20/2021	12:17:11 pm	4																								63	4	63	4	58	3	60	3
10/20/2021	12:17:31 pm	4																								63	4	64	4	58	3	60	3
10/20/2021	12:17:51 pm	4																								63	4	64	4	58	3	60	3
10/20/2021	12:18:11 pm	4																								63	4	64	4	58	3	60	3
10/20/2021	12:18:31 pm	4																								63	4	64	4	60	3	60	3
10/20/2021	12:18:51 pm	4																								63	4	64	4	60	3	60	3
10/20/2021	12:19:11 pm	4																								63	4	64	4	60	3	60	3
10/20/2021	12:19:31 pm	4																								63	4	64	4	60	3	60	3
10/20/2021	12:19:51 pm	4																								63	4	64	4	60	3	60	3
10/20/2021	12:20:11 pm	4																								63	4	64	4	60	3	60	3
10/20/2021	12:20:31 pm	4																								63	4	64	4	60	3	60	3
10/20/2021	12:20:51 pm	4																								63	4	64	4	60	3	60	3
10/20/2021	12:21:11 pm	4																								63	4	64	4	60	3	60	3
10/20/2021	12:21:31 pm	4																								63	4	64	4	60	3	60	3
10/20/2021	12:21:51 pm	4																								63	4	64	4	60	3	60	3
10/20/2021	12:22:11 pm	4																								63	4	64	4	60	3	60	3
10/20/2021	12:22:31 pm	4																								63	4	64	4	60	3	60	3
10/20/2021	12:22:51 pm	4																								63	4	64	4	60	3	60	3
10/20/2021	12:23:11 pm	4																								63	4	64	4	60	3	60	3
10/20/2021	12:23:31 pm	4																								64	4	64	4	60	3	60	3
10/20/2021	12:23:51 pm	4																								63	4	64	4	60	3	60	3
10/20/2021	12:24:11 pm	4																								64	4	64	4	60	3	60	3
10/20/2021	12:24:31 pm	4																								64	4	64	4	60	3	60	3
10/20/2021	12:24:51 pm	4																								64	4	64	4	60	3	60	3
10/20/2021	12:25:11 pm	4																								63	4	64	4	60	3	60	3
10/20/2021	12:25:31 pm	4																								64	4	64	4	60	3	60	3
10/20/2021	12:25:51 pm	4																								64	4	64	4	60	3	60	3
10/20/2021	12:26:11 pm	4																								64	4	65	4	60	3	60	3
10/20/2021	12:26:31 pm	4																								64	4	64	4	60	3	60	3
10/20/2021	12:26:51 pm	4																								64	4	65	4	60	3	60	3
10/20/2021	12:27:11 pm	4																								64	4	64	4	60	3	60	3
10/20/2021	12:27:31 pm	4																								64	4	64	4	60	3	60	3
10/20/2021	12:27:51 pm	4																								64	4	64	4	60	3	60	3
10/20/2021	12:28:11 pm	4																								64	4	64	4	60	3	60	3
10/20/2021	12:28:31 pm	4																								64	4	64	4	60	3	60	3
10/20/2021	12:28:51 pm	4																								64	4	64	4	60	3	60	3
10/20/2021	12:29:11 pm	4																								64	4	64	4	60	3	60	3
10/20/2021	12:29:31 pm	4																								64	4	64	4	60	3	60	3
10/20/2021	12:29:51 pm	4																								64	4	64	4	60	3	60	3
10/20/2021	12:30:11 pm	4																								64	4	64	4	60	3	60	3
10/20/2021	12:30:31 pm	4																								64	4	65	4	58	3	60	3
10/20/2021	12:30:51 pm	4																								64	4	64	4	58	3	60	3
10/20/2021	12:31:11 pm	4																								64	4	64	4	58	3	60	3
10/20/2021	12:31:31 pm	4																								64	4	65	4	58	3	60	3
10/20/2021	12:31:51 pm	4																								64	4	64	4	58	3	60	3
10/20/2021	12:32:11 pm	4																								64	4	64	4	58	3	60	3
10/20/2021	12:32:31 pm	4																								64	4	64	4	58	3	60	3
10/20/2021	12:32:51 pm	4																								64	4	65	4	58	3	60	3
10/20/2021	12:33:11 pm	4																								64	4	64	4	58	3	60	3
10/20/2021	12:33:31 pm	4																								64	4	64	4	58	3	60	3
10/20/2021	12:33:51 pm	4																								64	4	65	4	58	3	60	3
10/20/2021	12:34:11 pm	4																								64	4	65	4	58	3	60	3
10/20/2021	12:34:31 pm	4																								64	4	64	4	58	3	60	3
10/20/2021	12:34:51 pm	4																								64	4	64	4	58	3	60	3
10/20/2021	12:35:11 pm	4																								64	4	64	4	58	3	60	3
10/20/2021	12:35:31 pm	4																								64	4	64	4	58	3	60	3
10/20/2021	12:35:51 pm	4																								64	4	64	4	58	3	60	3
10/20/2021	12:36:11 pm	4																								64	4	64	4	58	3	60	3
10/20/2021	12:36:31 pm	4																								64	4	64	4	58	3	60	3
10/20/2021	12:36:51 pm	4																								63	4	64	4	58	3	60	3
10/20/2021	12:37:11 pm	4																								63	4	64	4	58	3	60	3
10/20/2021	12:37:31 pm	4																								63	4	64	4	58	3	60	3
10/20/2021	12:37:51 pm	4																								63	4	64	4	58	3	60	3
10/20/2021	12:38:11 pm	4																								63	4	64	4	58	3	60	3
10/20/2021	12:38:31 pm	4																								63	4	64	4	58	3	60	3
10/20/2021	12:38:51 pm	4																								63	4	63	4	58	3	60	3
10/20/2021	12:39:11 pm	4																								63	4	63	4	58	3	60	3
10/20/2021	12:39:31 pm	4																								63	4	64	4	58	3	60	3
10/20/2021	12:39:51 pm	4																								63	4	63	4	58	3	60	3
10/20/2021	12:40:11 pm	4																								63	4	63	4	58	3	60	3
10/20/2021	12:40:31 pm	4																								62	4	63	4	58	3	60	3
10/20/2021	12:40:51 pm	4																								62	4	63	4	58	3	60	3
10/20/2021	12:41:11 pm	4																								62	4	63	4	58	3	60	3
10/20/2021	12:41:31 pm	4																								62	4	63	4	58	3	60	3
10/20/2021	12:41:51 pm	4																								62	4	63	4	58	3	60	3
10/20/2021	12:42:11 pm	4																								62	4	62	4	58	3	60	3
10/20/2021	12:42:31 pm	4																								62	4	63	4	58	3	60	3
10/20/2021	12:42:51 pm	4																								62	4	62	4	58	3	60	3
10/20/2021	12:43:11 pm	4																								62	4	62	4	58	3	60	3
10/20/2021	12:43:31 pm	4																								62	4	63	4	58	3	60	3
10/20/2021	12:43:51 pm	4																								62	4	62	4	58	3	60	3
10/20/2021	12:44:11 pm	4																								62	4	62	4	58	3	60	3
10/20/2021	12:44:31 pm	4																								62	4	62	4	58	3	60	3
10/20/2021	12:44:51 pm	4																								62	4	62	4	58	3	60	3
10/20/2021	12:45:11 pm	4																								62	4	62	4	58	3	60	3
10/20/2021	12:45:31 pm	4																								62	4	62	4	58	3	60	3
10/20/2021	12:45:51 pm	4																								62	4	62	4	58	3	60	3
10/20/2021	12:46:11 pm	4																								62	4	62	4	58	3	60	3
10/20/2021	12:46:31 pm	4																								62	4	62	4	58	3	60	3
10/20/2021	12:46:51 pm	4																								62	4	63	4	58	3	60	3
10/20/2021	12:47:11 pm	4																								62	4	62	4	58	3	60	3
10/20/2021	12:47:31 pm	4																								63	4	63	4	58	3	60	3
10/20/2021	12:47:51 pm	4																								63	4	63	4	58	3	60	3
10/20/2021	12:48:11 pm	4																								63	4	63	4	58	3	60	3
10/20/2021	12:48:31 pm	4																								63	4	63	4	58	3	60	3
10/20/2021	12:48:51 pm	4																								63	4	63	4	58	3	60	3
10/20/2021	12:49:11 pm	4																								63	4	63	4	58	3	60	3
10/20/2021	12:49:31 pm	4																								63	4	63	4	58	3	60	3
10/20/2021	12:49:51 pm	4																								63	4	63	4	58	3	60	3
10/20/2021	12:50:11 pm	4																								63	4	63	4	58	3	60	3
10/20/2021	12:50:31 pm	4																								63	4	63	4	58	3	60	3
10/20/2021	12:50:51 pm	4																								63	4	63	4	58	3	60	3
10/20/2021	12:51:11 pm	4																								63	4	63	4	58	3	60	3
10/20/2021	12:51:31 pm	4																								63	4	63	4	58	3	60	3
10/20/2021	12:51:51 pm	4																								63	4	63	4	58	3	60	3
10/20/2021	12:52:11 pm	4																								62	4	62	4	58	3	60	3
10/20/2021	12:52:31 pm	4																								62	4	63	4	58	3	60	3
10/20/2021	12:52:51 pm	4																								62	4	62	4	58	3	60	3
10/20/2021	12:53:11 pm	4																								62	4	62	4	58	3	60	3
10/20/2021	12:53:31 pm	4																								62	4	62	4	58	3	60	3
10/20/2021	12:53:51 pm	4																								62	4	62	4	58	3	60	3
10/20/2021	12:54:11 pm	4																								63	4	63	4	58	3	60	3
10/20/2021	12:54:31 pm	4																								63	4	63	4	58	3	60	3
10/20/2021	12:54:51 pm	4																								64	4	63	4	58	3	60	3
10/20/2021	12:55:11 pm	4																								64	4	64	4	58	3	60	3
10/20/2021	12:55:31 pm	4																								65	4	64	4	58	3	60	3
10/20/2021	12:55:51 pm	4																								65	4	64	4	58	3	60	3
10/20/2021	12:56:11 pm	4																								65	4	65	4	58	3	60	3
10/20/2021	12:56:31 pm	4																								66	4	66	4	58	3	60	3
10/20/2021	12:56:51 pm	4																								66	4	66	4	56	3	60	3
10/20/2021	12:57:11 pm	4																								67	4	66	4	58	3	60	3
10/20/2021	12:57:31 pm	4																								66	4	67	4	59	3	60	3
10/20/2021	12:57:51 pm	4																								67	4	67	4	59	3	60	3
10/20/2021	12:58:11 pm	4																								67	4	67	4	58	3	60	3
10/20/2021	12:58:31 pm	4																								66	4	66	4	59	3	60	3
10/20/2021	12:58:51 pm	4																								66	4	67	4	58	3	60	3
10/20/2021	12:59:11 pm	4																								66	4	66	4	57	3	60	3
10/20/2021	12:59:31 pm	4																								66	4	66	4	55	3	60	3
10/20/2021	12:59:51 pm	4																								66	4	66	4	54	3	60	3
10/20/2021	1:00:11 pm	4																								66	4	66	4	53	3	60	3
10/20/2021	1:00:31 pm	4																								66	4	67	4	53	3	60	3
10/20/2021	1:00:51 pm	4																								66	4	66	4	53	3	60	3
10/20/2021	1:01:11 pm	4																								66	4	67	4	54	3	60	3
10/20/2021	1:01:31 pm	4																								66	4	67	4	55	3	60	3
10/20/2021	1:01:51 pm	4																								67	4	67	4	57	3	60	3
10/20/2021	1:02:11 pm	4																								67	4	67	4	60	3	60	3
10/20/2021	1:02:31 pm	4																								67	4	67	4	62	3	60	3
10/20/2021	1:02:51 pm	4																								67	4	68	4	64	3	60	3
10/20/2021	1:03:11 pm	4																								67	4	68	4	66	3	60	3
10/20/2021	1:03:31 pm	4																								67	4	68	4	67	3	60	3
10/20/2021	1:03:51 pm	4																								67	4	69	4	67	3	60	3
10/20/2021	1:04:11 pm	4																								67	4	69	4	67	3	60	3
10/20/2021	1:04:31 pm	4																								68	4	69	4	67	3	60	3
10/20/2021	1:04:51 pm	4																								67	4	69	4	68	3	60	3
10/20/2021	1:05:11 pm	4																								68	4	69	4	68	3	60	3
10/20/2021	1:05:31 pm	4																								68	4	69	4	69	3	60	3
10/20/2021	1:05:51 pm	4																								68	4	70	4	70	3	60	3
10/20/2021	1:06:11 pm	4																								68	4	69	4	72	3	60	3
10/20/2021	1:06:31 pm	4																								68	4	70	4	72	3	60	3
10/20/2021	1:06:51 pm	4																								68	4	70	4	73	3	60	3
10/20/2021	1:07:11 pm	4																								68	4	70	4	75	3	60	3
10/20/2021	1:07:31 pm	4																								68	4	70	4	75	3	60	3
10/20/2021	1:07:51 pm	4																								68	4	70	4	75	3	60	3
10/20/2021	1:08:11 pm	4																								68	4	70	4	74	3	60	3
10/20/2021	1:08:31 pm	4																								68	4	70	4	74	3	60	3
10/20/2021	1:08:51 pm	4																								68	4	70	4	73	3	60	3
10/20/2021	1:09:11 pm	4																								67	4	69	4	72	3	60	3
10/20/2021	1:09:31 pm	4																								67	4	69	4	66	3	60	3
10/20/2021	1:09:51 pm	4																								68	4	70	4	71	3	60	3
10/20/2021	1:10:11 pm	4																								66	4	68	4	72	3	60	3
10/20/2021	1:10:31 pm	4																								67	4	69	4	70	3	60	3
10/20/2021	1:10:51 pm	4																								64	4	65	4	67	3	60	3
10/20/2021	1:11:11 pm	4																								62	4	64	4	63	3	60	3
10/20/2021	1:11:31 pm	4																								61	4	63	4	57	3	60	3
10/20/2021	1:11:51 pm	4																								59	4	61	4	57	3	60	3
10/20/2021	1:12:11 pm	4																								59	4	61	4	57	3	60	3
10/20/2021	1:12:31 pm	4																								59	4	60	4	57	3	60	3
10/20/2021	1:12:51 pm	4																								60	4	62	4	57	3	60	3
10/20/2021	1:13:11 pm	4																								62	4	63	4	56	3	60	3
10/20/2021	1:13:31 pm	4																								62	4	64	4	64	3	60	3
10/20/2021	1:13:51 pm	4																								63	4	64	4	61	3	60	3
10/20/2021	1:14:11 pm	4																								64	4	66	4	59	3	60	3
10/20/2021	1:14:31 pm	4																								65	4	67	4	57	3	60	3
10/20/2021	1:14:51 pm	4																								66	4	69	4	56	3	60	3
10/20/2021	1:15:11 pm	4																								66	4	69	4	56	3	60	3
10/20/2021	1:15:31 pm	4																								66	4	69	4	58	3	60	3
10/20/2021	1:15:51 pm	4																								67	4	69	4	58	3	60	3
10/20/2021	1:16:11 pm	4																								67	4	70	4	60	3	60	3
10/20/2021	1:16:31 pm	4																								67	4	70	4	59	3	60	3
10/20/2021	1:16:51 pm	4																								68	4	70	4	60	3	60	3
10/20/2021	1:17:11 pm	4																								67	4	70	4	61	3	60	3
10/20/2021	1:17:31 pm	4																								68	4	69	4	58	3	60	3
10/20/2021	1:17:51 pm	4																								67	4	70	4	63	3	60	3
10/20/2021	1:18:11 pm	4																								67	4	71	4	66	3	60	3
10/20/2021	1:18:31 pm	4																								68	4	72	4	66	3	60	3
10/20/2021	1:18:51 pm	4																								68	4	71	4	65	3	60	3
10/20/2021	1:19:11 pm	4																								68	4	71	4	64	3	60	3
10/20/2021	1:19:31 pm	4																								68	4	71	4	61	3	60	3
10/20/2021	1:19:51 pm	4																								67	4	70	4	57	3	60	3
10/20/2021	1:20:11 pm	4																								68	4	70	4	54	3	60	3
10/20/2021	1:20:31 pm	4																								67	4	70	4	52	3	60	3
10/20/2021	1:20:51 pm	4																								68	4	70	4	52	3	60	3
10/20/2021	1:21:11 pm	4																								68	4	70	4	55	3	60	3
10/20/2021	1:21:31 pm	4																								68	4	71	4	56	3	60	3
10/20/2021	1:21:51 pm	4																								68	4	70	4	59	3	60	3
10/20/2021	1:22:11 pm	4																								68	4	69	4	62	3	60	3
10/20/2021	1:22:31 pm	4																								66	4	68	4	61	3	60	3
10/20/2021	1:22:51 pm	4																								66	4	69	4	56	3	60	3
10/20/2021	1:23:11 pm	4																								66	4	69	4	54	3	60	3
10/20/2021	1:23:31 pm	4																								67	4	69	4	57	3	60	3
10/20/2021	1:23:51 pm	4																								67	4	69	4	58	3	60	3
10/20/2021	1:24:11 pm	4																								67	4	69	4	62	3	60	3
10/20/2021	1:24:31 pm	4																								66	4	69	4	62	3	60	3
10/20/2021	1:24:51 pm	4																								66	4	69	4	60	3	60	3
10/20/2021	1:25:11 pm	4																								66	4	69	4	57	3	60	3
10/20/2021	1:25:31 pm	4																								66	4	68	4	56	3	60	3
10/20/2021	1:25:51 pm	4																								65	4	68	4	55	3	60	3
10/20/2021	1:26:11 pm	4																								65	4	67	4	55	3	60	3
10/20/2021	1:26:31 pm	4																								65	4	67	4	55	3	60	3
10/20/2021	1:26:51 pm	4																								65	4	67	4	55	3	60	3
10/20/2021	1:27:11 pm	4																								65	4	67	4	55	3	60	3
10/20/2021	1:27:31 pm	4																								65	4	67	4	55	3	60	3
10/20/2021	1:27:51 pm	4																								65	4	68	4	55	3	60	3
10/20/2021	1:28:11 pm	4																								66	4	68	4	55	3	60	3
10/20/2021	1:28:31 pm	4																								67	4	69	4	64	3	60	3
10/20/2021	1:28:51 pm	4																								69	4	72	4	73	3	60	3
10/20/2021	1:29:11 pm	4																								70	4	74	4	72	3	66	3
10/20/2021	1:29:31 pm	4																								70	4	74	4	70	3	66	3
10/20/2021	1:29:51 pm	4																								71	4	74	4	68	3	66	3
10/20/2021	1:30:11 pm	4																								70	4	75	4	65	3	66	3
10/20/2021	1:30:31 pm	4																								70	4	74	4	64	3	66	3
10/20/2021	1:30:51 pm	4																								71	4	74	4	64	3	66	3
10/20/2021	1:31:11 pm	4																								71	4	75	4	63	3	66	3
10/20/2021	1:31:31 pm	4																								72	4	74	4	61	3	66	3
10/20/2021	1:31:51 pm	4																								72	4	74	4	61	3	66	3
10/20/2021	1:32:11 pm	4																								71	4	74	4	62	3	66	3
10/20/2021	1:32:31 pm	4																								71	4	75	4	63	3	66	3
10/20/2021	1:32:51 pm	4																								71	4	75	4	64	3	66	3
10/20/2021	1:33:11 pm	4																								72	4	74	4	64	3	66	3
10/20/2021	1:33:31 pm	4																								71	4	73	4	64	3	66	3
10/20/2021	1:33:51 pm	4																								70	4	73	4	70	3	66	3
10/20/2021	1:34:11 pm	4																								71	4	74	4	85	3	71	3
10/20/2021	1:34:31 pm	4																								72	4	74	4	88	3	75	3
10/20/2021	1:34:51 pm	4																								72	4	74	4	88	3	76	3
10/20/2021	1:35:11 pm	4																								72	4	74	4	85	3	72	3
10/20/2021	1:35:31 pm	4																								72	4	74	4	79	3	71	3
10/20/2021	1:35:51 pm	4																								71	4	75	4	74	3	70	3
10/20/2021	1:36:11 pm	4																								72	4	74	4	73	3	70	3
10/20/2021	1:36:31 pm	4																								72	4	74	4	68	3	70	3
10/20/2021	1:36:51 pm	4																								72	4	75	4	67	3	70	3
10/20/2021	1:37:11 pm	4																								72	4	75	4	65	3	70	3
10/20/2021	1:37:31 pm	4																								72	4	75	4	65	3	68	3
10/20/2021	1:37:51 pm	4																								72	4	74	4	64	3	68	3
10/20/2021	1:38:11 pm	4																								72	4	75	4	64	3	68	3
10/20/2021	1:38:31 pm	4																								72	4	75	4	64	3	68	3
10/20/2021	1:38:51 pm	4																								73	4	75	4	63	3	68	3
10/20/2021	1:39:11 pm	4																								72	4	76	4	64	3	68	3
10/20/2021	1:39:31 pm	4																								72	4	75	4	63	3	68	3
10/20/2021	1:39:51 pm	4																								73	4	74	4	63	3	68	3
10/20/2021	1:40:11 pm	4																								73	4	75	4	63	3	68	3
10/20/2021	1:40:31 pm	4																								72	4	75	4	63	3	68	3
10/20/2021	1:40:51 pm	4																								72	4	75	4	63	3	68	3
10/20/2021	1:41:11 pm	4																								73	4	74	4	63	3	68	3
10/20/2021	1:41:31 pm	4																								73	4	74	4	63	3	68	3
10/20/2021	1:41:51 pm	4																								72	4	74	4	63	3	68	3
10/20/2021	1:42:11 pm	4																								72	4	74	4	63	3	68	3
10/20/2021	1:42:31 pm	4																								72	4	74	4	63	3	68	3
10/20/2021	1:42:51 pm	4																								72	4	74	4	63	3	68	3
10/20/2021	1:43:11 pm	4																								73	4	74	4	63	3	66	3
10/20/2021	1:43:31 pm	4																								72	4	73	4	63	3	66	3
10/20/2021	1:43:51 pm	4																								72	4	73	4	63	3	66	3
10/20/2021	1:44:11 pm	4																								71	4	73	4	63	3	66	3
10/20/2021	1:44:31 pm	4																								71	4	72	4	63	3	66	3
10/20/2021	1:44:51 pm	4																								71	4	71	4	63	3	66	3
10/20/2021	1:45:11 pm	4																								70	4	71	4	63	3	66	3
10/20/2021	1:45:31 pm	4																								71	4	71	4	63	3	66	3
10/20/2021	1:45:51 pm	4																								71	4	71	4	63	3	66	3
10/20/2021	1:46:11 pm	4																								71	4	71	4	63	3	66	3
10/20/2021	1:46:31 pm	4																								71	4	71	4	63	3	66	3
10/20/2021	1:46:51 pm	4																								70	4	71	4	63	3	66	3
10/20/2021	1:47:11 pm	4																								70	4	71	4	63	3	66	3
10/20/2021	1:47:31 pm	4																								70	4	70	4	63	3	66	3
10/20/2021	1:47:51 pm	4																								70	4	70	4	63	3	66	3
10/20/2021	1:48:11 pm	4																								70	4	70	4	64	3	66	3
10/20/2021	1:48:31 pm	4																								69	4	70	4	64	3	66	3
10/20/2021	1:48:51 pm	4																								68	4	69	4	64	3	66	3
10/20/2021	1:49:11 pm	4																								69	4	69	4	64	3	66	3
10/20/2021	1:49:31 pm	4																								69	4	69	4	64	3	66	3
10/20/2021	1:49:51 pm	4																								68	4	69	4	64	3	66	3
10/20/2021	1:50:11 pm	4																								69	4	69	4	64	3	66	3
10/20/2021	1:50:31 pm	4																								69	4	69	4	64	3	66	3
10/20/2021	1:50:51 pm	4																								67	4	69	4	64	3	66	3
10/20/2021	1:51:11 pm	4																								68	4	68	4	64	3	66	3
10/20/2021	1:51:31 pm	4																								67	4	68	4	64	3	66	3
10/20/2021	1:51:51 pm	4																								68	4	68	4	64	3	64	3
10/20/2021	1:52:11 pm	4																								68	4	68	4	64	3	64	3
10/20/2021	1:52:31 pm	4																								68	4	69	4	64	3	64	3
10/20/2021	1:52:51 pm	4																								68	4	69	4	64	3	64	3
10/20/2021	1:53:11 pm	4																								68	4	68	4	64	3	64	3
10/20/2021	1:53:31 pm	4																								68	4	68	4	64	3	64	3
10/20/2021	1:53:51 pm	4																								68	4	68	4	64	3	64	3
10/20/2021	1:54:11 pm	4																								68	4	68	4	64	3	64	3
10/20/2021	1:54:31 pm	4																								68	4	68	4	64	3	64	3
10/20/2021	1:54:51 pm	4																								67	4	67	4	64	3	64	3
10/20/2021	1:55:11 pm	4																								67	4	68	4	64	3	64	3
10/20/2021	1:55:31 pm	4																								67	4	67	4	64	3	64	3
10/20/2021	1:55:51 pm	4																								67	4	67	4	64	3	64	3
10/20/2021	1:56:11 pm	4																								67	4	67	4	64	3	64	3
10/20/2021	1:56:31 pm	4																								67	4	67	4	64	3	64	3
10/20/2021	1:56:51 pm	4																								67	4	67	4	64	3	64	3
10/20/2021	1:57:11 pm	4																								66	4	66	4	64	3	64	3
10/20/2021	1:57:31 pm	4																								67	4	67	4	62	3	64	3
10/20/2021	1:57:51 pm	4																								66	4	66	4	62	3	64	3
10/20/2021	1:58:11 pm	4																								65	4	66	4	62	3	64	3
10/20/2021	1:58:31 pm	4																								66	4	66	4	62	3	64	3
10/20/2021	1:58:51 pm	4																								66	4	66	4	62	3	64	3
10/20/2021	1:59:11 pm	4																								66	4	66	4	62	3	64	3
10/20/2021	1:59:31 pm	4																								66	4	66	4	62	3	64	3
10/20/2021	1:59:51 pm	4																								66	4	66	4	62	3	64	3
10/20/2021	2:00:11 pm	4																								66	4	66	4	62	3	64	3
10/20/2021	2:00:31 pm	4																								66	4	66	4	62	3	64	3
10/20/2021	2:00:51 pm	4																								66	4	66	4	62	3	64	3
10/20/2021	2:01:11 pm	4																								66	4	66	4	62	3	64	3
10/20/2021	2:01:31 pm	4																								66	4	65	4	62	3	63	3
10/20/2021	2:01:51 pm	4																								66	4	65	4	62	3	63	3
10/20/2021	2:02:11 pm	4																								66	4	65	4	62	3	63	3
10/20/2021	2:02:31 pm	4																								66	4	65	4	62	3	63	3
10/20/2021	2:02:51 pm	4																								65	4	65	4	62	3	63	3
10/20/2021	2:03:11 pm	4																								65	4	64	4	62	3	63	3
10/20/2021	2:03:31 pm	4																								65	4	64	4	62	3	63	3
10/20/2021	2:03:51 pm	4																								64	4	63	4	62	3	63	3
10/20/2021	2:04:11 pm	4																								64	4	63	4	62	3	63	3
10/20/2021	2:04:31 pm	4																								64	4	63	4	62	3	63	3
10/20/2021	2:04:51 pm	4																								64	4	63	4	62	3	63	3
10/20/2021	2:05:11 pm	4																								64	4	63	4	62	3	63	3
10/20/2021	2:05:31 pm	4																								63	4	63	4	62	3	63	3
10/20/2021	2:05:51 pm	4																								63	4	63	4	62	3	63	3
10/20/2021	2:06:11 pm	4																								64	4	63	4	62	3	63	3
10/20/2021	2:06:31 pm	4																								64	4	64	4	62	3	63	3
10/20/2021	2:06:51 pm	4																								64	4	64	4	62	3	63	3
10/20/2021	2:07:11 pm	4																								64	4	63	4	62	3	63	3
10/20/2021	2:07:31 pm	4																								64	4	63	4	62	3	63	3
10/20/2021	2:07:51 pm	4																								64	4	64	4	62	3	63	3
10/20/2021	2:08:11 pm	4																								64	4	64	4	62	3	63	3
10/20/2021	2:08:31 pm	4																								64	4	64	4	62	3	63	3
10/20/2021	2:08:51 pm	4																								64	4	64	4	62	3	63	3
10/20/2021	2:09:11 pm	4																								64	4	64	4	62	3	63	3
10/20/2021	2:09:31 pm	4																								64	4	64	4	62	3	63	3
10/20/2021	2:09:51 pm	4																								64	4	65	4	62	3	63	3
10/20/2021	2:10:11 pm	4																								64	4	64	4	62	3	63	3
10/20/2021	2:10:31 pm	4																								64	4	64	4	62	3	63	3
10/20/2021	2:10:51 pm	4																								64	4	65	4	62	3	63	3
10/20/2021	2:11:11 pm	4																								64	4	64	4	62	3	63	3
10/20/2021	2:11:31 pm	4																								65	4	65	4	62	3	63	3
10/20/2021	2:11:51 pm	4																								65	4	65	4	62	3	63	3
10/20/2021	2:12:11 pm	4																								65	4	65	4	62	3	63	3
10/20/2021	2:12:31 pm	4																								65	4	65	4	62	3	63	3
10/20/2021	2:12:51 pm	4																								65	4	64	4	62	3	63	3
10/20/2021	2:13:11 pm	4																								65	4	65	4	62	3	63	3
10/20/2021	2:13:31 pm	4																								65	4	65	4	62	3	63	3
10/20/2021	2:13:51 pm	4																								65	4	65	4	62	3	63	3
10/20/2021	2:14:11 pm	4																								65	4	65	4	62	3	63	3
10/20/2021	2:14:31 pm	4																								65	4	64	4	62	3	63	3
10/20/2021	2:14:51 pm	4																								65	4	64	4	62	3	63	3
10/20/2021	2:15:11 pm	4																								64	4	64	4	62	3	63	3
10/20/2021	2:15:31 pm	4																								64	4	64	4	62	3	63	3
10/20/2021	2:15:51 pm	4																								64	4	64	4	62	3	63	3
10/20/2021	2:16:11 pm	4																								64	4	64	4	62	3	63	3
10/20/2021	2:16:31 pm	4																								64	4	64	4	62	3	63	3
10/20/2021	2:16:51 pm	4																								64	4	63	4	62	3	63	3
10/20/2021	2:17:11 pm	4																								64	4	64	4	62	3	63	3
10/20/2021	2:17:31 pm	4																								64	4	63	4	62	3	63	3
10/20/2021	2:17:51 pm	4																								64	4	64	4	62	3	63	3
10/20/2021	2:18:11 pm	4																								64	4	63	4	62	3	63	3
10/20/2021	2:18:31 pm	4																								64	4	63	4	62	3	63	3
10/20/2021	2:18:51 pm	4																								64	4	63	4	62	3	63	3
10/20/2021	2:19:11 pm	4																								64	4	63	4	62	3	63	3
10/20/2021	2:19:31 pm	4																								64	4	63	4	62	3	63	3
10/20/2021	2:19:51 pm	4																								64	4	63	4	62	3	63	3
10/20/2021	2:20:11 pm	4																								64	4	63	4	62	3	63	3
10/20/2021	2:20:31 pm	4																								64	4	63	4	62	3	63	3
10/20/2021	2:20:51 pm	4																								64	4	63	4	62	3	63	3
10/20/2021	2:21:11 pm	4																								63	4	63	4	62	3	63	3

## Sheet: ID 9
Date	Time	Technology	CO	sCO	CI	sCI	SV	SVI	PR	SYSART	DIAART	MAP	SVR	SVRI	SVV	PRV	PPV	EDV	sEDV	EDVI	sEDVI	RVEF	sRVEF	ScvO₂/SvO₂	SQI	StO₂ A1	TPI A1	StO₂ A2	TPI A2	StO₂ B1	TPI B1	StO₂ B2	TPI B2
		1-F, 4-SG	L/min	L/min	L/min/m²	L/min/m²	mL/b	mL/b/m²	bpm	mmHg	mmHg	mmHg	dyne-s/cm⁵	dyne-s-m²/cm⁵	%		%	mL	mL	mL/m²	mL/m²	% EFU	% EFU	%		%		%		%		%
10/25/2021	8:22:45 am	4																									65535		65535		65535		65535
10/25/2021	8:23:05 am	4																									65535		65535		65535		65535
10/25/2021	8:23:25 am	4																									65535		65535		65535		65535
10/25/2021	8:23:45 am	4																									65535		65535		65535		65535
10/25/2021	8:24:05 am	4																									65535		65535		65535		65535
10/25/2021	8:24:25 am	4																									65535		65535		65535		65535
10/25/2021	8:24:45 am	4																									65535		65535		65535		65535
10/25/2021	8:25:05 am	4
10/25/2021	8:25:25 am	4
10/25/2021	8:25:45 am	4
10/25/2021	8:26:05 am	4
10/25/2021	8:26:25 am	4
10/25/2021	8:26:45 am	4
10/25/2021	8:27:05 am	4
10/25/2021	8:27:25 am	4
10/25/2021	8:27:45 am	4
10/25/2021	8:28:05 am	4
10/25/2021	8:28:25 am	4
10/25/2021	8:28:45 am	4
10/25/2021	8:29:05 am	4
10/25/2021	8:29:25 am	4
10/25/2021	8:29:45 am	4
10/25/2021	8:30:05 am	4
10/25/2021	8:30:25 am	4
10/25/2021	8:30:45 am	4
10/25/2021	8:31:05 am	4
10/25/2021	8:31:25 am	4
10/25/2021	8:31:45 am	4
10/25/2021	8:32:05 am	4
10/25/2021	8:32:25 am	4
10/25/2021	8:32:45 am	4
10/25/2021	8:33:05 am	4
10/25/2021	8:33:25 am	4
10/25/2021	8:33:45 am	4
10/25/2021	8:34:05 am	4
10/25/2021	8:34:25 am	4
10/25/2021	8:34:45 am	4
10/25/2021	8:35:05 am	4
10/25/2021	8:35:25 am	4
10/25/2021	8:35:45 am	4
10/25/2021	8:36:05 am	4
10/25/2021	8:36:25 am	4
10/25/2021	8:36:45 am	4
10/25/2021	8:37:05 am	4
10/25/2021	8:37:25 am	4
10/25/2021	8:37:45 am	4
10/25/2021	8:38:05 am	4
10/25/2021	8:38:25 am	4
10/25/2021	8:38:45 am	4
10/25/2021	8:39:05 am	4
10/25/2021	8:39:25 am	4
10/25/2021	8:39:45 am	4
10/25/2021	8:40:05 am	4
10/25/2021	8:40:25 am	4
10/25/2021	8:40:45 am	4
10/25/2021	8:41:05 am	4
10/25/2021	8:41:25 am	4
10/25/2021	8:41:45 am	4
10/25/2021	8:42:05 am	4
10/25/2021	8:42:25 am	4
10/25/2021	8:42:45 am	4
10/25/2021	8:43:05 am	4
10/25/2021	8:43:25 am	4
10/25/2021	8:43:45 am	4
10/25/2021	8:44:05 am	4
10/25/2021	8:44:25 am	4
10/25/2021	8:44:45 am	4
10/25/2021	8:45:05 am	4
10/25/2021	8:45:25 am	4
10/25/2021	8:45:45 am	4
10/25/2021	8:46:05 am	4
10/25/2021	8:46:25 am	4
10/25/2021	8:46:45 am	4
10/25/2021	8:47:05 am	4
10/25/2021	8:47:25 am	4
10/25/2021	8:47:45 am	4
10/25/2021	8:48:05 am	4
10/25/2021	8:48:25 am	4
10/25/2021	8:48:45 am	4
10/25/2021	8:49:05 am	4
10/25/2021	8:49:25 am	4
10/25/2021	8:49:45 am	4
10/25/2021	8:50:05 am	4
10/25/2021	8:50:25 am	4
10/25/2021	8:50:45 am	4
10/25/2021	8:51:05 am	4
10/25/2021	8:51:25 am	4
10/25/2021	8:51:45 am	4
10/25/2021	8:52:05 am	4
10/25/2021	8:52:25 am	4
10/25/2021	8:52:45 am	4																								64	4	69	4	56	3	62	3
10/25/2021	8:53:05 am	4																								63	4	69	4	56	3	62	3
10/25/2021	8:53:25 am	4																								64	4	69	4	56	3	62	3
10/25/2021	8:53:45 am	4																								63	4	69	4	56	2	62	3
10/25/2021	8:54:05 am	4																								63	4	68	4	56	3	62	3
10/25/2021	8:54:25 am	4																								64	4	68	4	56	3	58	4
10/25/2021	8:54:45 am	4																								64	4	69	4	56	3	56	4
10/25/2021	8:55:05 am	4																								64	4	70	4	56	3	54	4
10/25/2021	8:55:25 am	4																								64	4	70	4	56	3	58	4
10/25/2021	8:55:45 am	4																								65	4	70	4	54	3	58	4
10/25/2021	8:56:05 am	4																								65	4	69	4	60	3	64	4
10/25/2021	8:56:25 am	4																								66	4	69	4	60	3	64	4
10/25/2021	8:56:45 am	4																								65	4	69	4	56	3	60	4
10/25/2021	8:57:05 am	4																								65	4	69	4	58	3	60	4
10/25/2021	8:57:25 am	4																								65	4	69	4	55	3	58	4
10/25/2021	8:57:45 am	4																								65	4	70	4	57	3	61	4
10/25/2021	8:58:05 am	4																								65	4	70	4	62	3	63	4
10/25/2021	8:58:25 am	4																								66	4	70	4	61	3	64	4
10/25/2021	8:58:45 am	4																								66	4	71	4	63	3	68	4
10/25/2021	8:59:05 am	4																								66	4	71	4	64	3	68	4
10/25/2021	8:59:25 am	4																								66	4	71	4	66	3	69	4
10/25/2021	8:59:45 am	4																								66	4	71	4	66	3	69	4
10/25/2021	9:00:05 am	4																								66	4	71	4	63	3	67	4
10/25/2021	9:00:25 am	4																								67	4	71	4	63	3	66	4
10/25/2021	9:00:45 am	4																								67	4	72	4	65	3	66	4
10/25/2021	9:01:05 am	4																								67	4	72	4	67	3	69	4
10/25/2021	9:01:25 am	4																								67	4	71	4	69	3	70	4
10/25/2021	9:01:45 am	4																								67	4	72	4	67	3	68	4
10/25/2021	9:02:05 am	4																								67	4	72	4	71	3	71	4
10/25/2021	9:02:25 am	4																								66	4	71	4	71	3	70	4
10/25/2021	9:02:45 am	4																								66	4	71	4	68	3	67	4
10/25/2021	9:03:05 am	4																								66	4	71	4	71	3	70	4
10/25/2021	9:03:25 am	4																								66	4	71	4	68	3	68	4
10/25/2021	9:03:45 am	4																								66	4	71	4	68	3	69	4
10/25/2021	9:04:05 am	4																								66	4	71	4	68	3	67	4
10/25/2021	9:04:25 am	4																								66	4	71	4	69	3	69	4
10/25/2021	9:04:45 am	4																								65	4	71	4	67	3	65	4
10/25/2021	9:05:05 am	4																								65	4	71	4	66	3	64	4
10/25/2021	9:05:25 am	4																								65	4	70	4	66	3	65	4
10/25/2021	9:05:45 am	4																								65	4	70	4	65	3	65	4
10/25/2021	9:06:05 am	4																								64	4	70	4	65	3	63	4
10/25/2021	9:06:25 am	4																								64	4	70	4	58	2	62	4
10/25/2021	9:06:45 am	4																								64	4	70	4	60	2	64	4
10/25/2021	9:07:05 am	4																								64	4	70	4	56	3	61	4
10/25/2021	9:07:25 am	4																								65	4	71	4	57	3	59	4
10/25/2021	9:07:45 am	4																								65	4	71	4	55	3	59	4
10/25/2021	9:08:05 am	4																								65	4	72	4	61	3	64	4
10/25/2021	9:08:25 am	4																								66	4	71	4	57	3	61	4
10/25/2021	9:08:45 am	4																								66	4	71	4	56	3	58	4
[truncated: 794 more rows]

[truncated: 12 more sheets: ID 10x, ID 11, ID 12, ID 13, ID 14, ID 15, ID 16, ID 17, ID18, ID 19, ID 20x, ID 21]
